## **Cross-compartment signal propagation in the Mitotic Exit Network.**

Xiaoxue Zhou<sup>1,\*</sup>, Wenxue Li<sup>2</sup>, Yansheng Liu<sup>2</sup>, Angelika Amon<sup>1,\*</sup>

<sup>1</sup>David H. Koch Institute for Integrative Cancer Research, Howard Hughes Medical Institute, Massachusetts Institute of Technology, Cambridge, MA 02139, USA

<sup>2</sup>Yale Cancer Biology Institute, Department of Pharmacology, Yale University, West Haven, CT 06516, USA

\*Correspondence to: [xiaoxue@mit.edu](mailto:xiaoxue@mit.edu) and [angelika@mit.edu](mailto:angelika@mit.edu)

1 **ABSTRACT (150 words)**

2 In budding yeast, the Mitotic Exit Network (MEN), a GTPase signaling cascade integrates  
3 spatial and temporal cues to promote exit from mitosis. This signal integration requires  
4 transmission of a signal generated on the cytoplasmic face of spindle pole bodies (SPBs; yeast  
5 equivalent of centrosomes) to the nucleolus, where the MEN effector protein Cdc14 resides.  
6 Here, we show that the MEN activating signal at SPBs is relayed to Cdc14 in the nucleolus  
7 through the dynamic localization of its terminal kinase complex Dbf2-Mob1. Cdc15, the protein  
8 kinase that activates Dbf2-Mob1 at SPBs, also regulates its nuclear access. Once in the nucleus,  
9 priming phosphorylation of Cfi1/Net1, the nucleolar anchor of Cdc14, by the Polo-like kinase  
10 Cdc5 targets Dbf2-Mob1 to the nucleolus. Nucleolar Dbf2-Mob1 then phosphorylates Cfi1/Net1  
11 and Cdc14, activating Cdc14. The kinase-primed transmission of the MEN signal from the  
12 cytoplasm to the nucleolus exemplifies how signaling cascades can bridge distant inputs and  
13 responses.  
14

## 15 INTRODUCTION

16 In cellular signaling, the sensing of signals (i.e. binding of signaling molecules at cell surface)  
17 and the response (i.e. transcription in the nucleus) often occur in different cellular compartments.  
18 Determining how signals are transmitted across compartments is thus essential for understanding  
19 signal transmission. The Mitotic Exit Network (MEN), a Ras-like GTPase kinase signaling  
20 cascade and budding yeast homolog of the Hippo pathway (Hergovich and Hemmings, 2012),  
21 represents such an example for signaling across cellular compartments. The MEN-activating  
22 signal is sensed and processed at the cytoplasmic face of spindle pole bodies (SPBs; yeast  
23 functional equivalent of the centrosomes), whereas the MEN effector protein Cdc14 resides in  
24 the nucleolus (Figure 1A). Because budding yeast undergo a closed mitosis without  
25 disassembling the nuclear envelope and nucleolus, the MEN must transmit a signal generated at  
26 the cytoplasmic face of SPBs, across the nuclear envelope and into the nucleolus to activate its  
27 effector Cdc14. The molecular mechanisms governing this cross-compartment signaling process  
28 remain largely unknown.

29 The central function of the MEN is to couple the final cell cycle transition, exit from  
30 mitosis (when the mitotic spindle is disassembled, chromosomes decondense and cytokinesis  
31 ensues), to nuclear/spindle position. In many organisms such as budding yeast, fission yeast as  
32 well as some plant species, the site of cytokinesis/division plane (i.e. the bud neck) is determined  
33 prior to mitosis (Guertin et al., 2002). Thus, the mitotic spindle must be positioned accordingly  
34 to ensure accurate genome partitioning between the daughter cells. In addition, these organisms  
35 have evolved surveillance mechanisms to monitor spindle position and regulate cell cycle  
36 progression in response. This surveillance mechanism is best understood in budding yeast where  
37 spindle position controls the activity of the MEN.

38 The MEN senses spindle position through a Ras-like GTPase Tem1. Tem1 is activated  
39 when a SPB enters the bud (Bardin et al., 2000; Pereira et al., 2000). Together with the Polo-like  
40 kinase Cdc5, Tem1 activates its effector, the Hippo-like protein kinase Cdc15, presumably by  
41 recruiting Cdc15 to the SPBs (Rock and Amon, 2011) (Figure 1A). Cdc15 then activates the  
42 LATS/NDR kinase Dbf2-Mob1 via a two-step process (Rock et al., 2013). Cdc15 first  
43 phosphorylates the MEN scaffold Nud1, a core component of the SPB outer plaque. This creates  
44 a docking site for Dbf2-Mob1 on Nud1 and facilitates subsequent phosphorylation of Dbf2-  
45 Mob1 by Cdc15 which activates Dbf2-Mob1 (Mah et al., 2001; Rock et al., 2013).

46 In addition to sensing spindle position, the MEN also integrates cues of cell cycle  
47 progression through the downstream kinases Cdc15 and Dbf2-Mob1 (Campbell et al., 2019).  
48 Two cell cycle events are sensed by the MEN: (1) Activity of the Polo-like kinase Cdc5:  
49 activation of Cdc15 depends on Cdc5 activity (Rock and Amon, 2011) which occurs only in  
50 mitosis (Cheng et al., 1998); (2) Initiation of anaphase: cyclin-dependent kinases (CDKs)  
51 phosphorylate Cdc15 and Mob1 thereby inhibiting their activity (Jaspersen and Morgan, 2000;  
52 König et al., 2010). At the onset of anaphase, CDK activity declines due to cyclin degradation,  
53 which lifts this inhibition. This loss of inhibition by CDKs creates a state whereby the MEN is  
54 poised for activation.

55 Once activated, the MEN promotes exit from mitosis by activating the phosphatase  
56 Cdc14. As an antagonist of CDKs, Cdc14 reverses CDK-dependent phosphorylation and  
57 promotes mitotic CDK inactivation thereby returning the cell to a G1 state (reviewed in  
58 Stegmeier and Amon, 2004). Given the central role of Cdc14 in promoting mitotic exit, it is not  
59 surprising that the phosphatase is tightly regulated. Cdc14 is sequestered in the nucleolus by its  
60 inhibitor Cfi1/Net1 from G1 until the onset of anaphase (Shou et al., 1999; Visintin et al., 1999).  
61 During anaphase, Cdc14 is released from its inhibitor, spreads throughout the nucleus and  
62 cytoplasm to dephosphorylate its targets.

63 Two pathways, the Cdc fourteen early anaphase release (FEAR) network and the MEN  
64 promote the dissociation of Cdc14 from its inhibitor during anaphase. Upon anaphase entry,  
65 Cdc14 is transiently released from the nucleolus by the FEAR network (reviewed in Rock and  
66 Amon, 2009). The FEAR network promotes dissociation of Cdc14 from Cfi1/Net1 through  
67 facilitating phosphorylation of Cfi1/Net1 by mitotic CDKs (Azzam, 2004; Queralt et al., 2006).  
68 This transient release, although not essential for exit from mitosis, is crucial for the timely  
69 execution of several anaphase events such as segregation of the nucleolus (D'Amours et al.,  
70 2004; Sullivan et al., 2004; Torres-Rosell et al., 2004) and MEN activation by counteracting  
71 CDK inhibition of MEN kinases (Campbell et al., 2019; Jaspersen and Morgan, 2000; König et  
72 al., 2010). In late anaphase, the activated MEN drives a more sustained and complete release of  
73 Cdc14 from the nucleolus which ultimately results in exit from mitosis. In the absence of MEN  
74 activity, Cdc14, after a transient FEAR network-mediated release from the nucleolus during  
75 early anaphase, is re-sequestered in the nucleolus and cells arrest in late anaphase.



76           Despite our extensive knowledge of the MEN and Cdc14, how the MEN promotes the  
77 sustained release of Cdc14 from its inhibitor in the nucleolus is not well understood. One  
78 contributing mechanism involves the phosphorylation of the nuclear localization signal (NLS)  
79 sequence in the C-terminus of Cdc14 by the MEN kinase Dbf2-Mob1 (Mohl et al., 2009).  
80 Inactivation of the NLS by the MEN promotes redistribution of Cdc14 via its nuclear export  
81 signal (NES) from the nucleus to the cytoplasm. However, retention of Cdc14 in the cytoplasm is  
82 not required for mitotic exit (Bembenek et al., 2005; Kuilman et al., 2015; Mohl et al., 2009).  
83 Furthermore, a Cdc14 mutant lacking the Dbf2 phosphorylation sites within its NLS is still  
84 released from the nucleolus in late anaphase (Mohl et al., 2009). These results suggest that MEN-  
85 mediated cytoplasmic retention of Cdc14 is not the main mechanism whereby the MEN activates  
86 Cdc14. Rather, the MEN must also disrupt the interaction between Cdc14 and its inhibitor  
87 Cfi1/Net1 in the nucleolus.

88           How does the MEN, activated at the outer plaque of SPBs in the cytosol, liberate Cdc14  
89 from its inhibitor in the nucleolus? Here, we demonstrate that the terminal kinase in the MEN,  
90 Dbf2-Mob1, serves as the molecular messenger traveling between the SPBs and the nucleolus to  
91 release Cdc14 from its inhibitor. We show that Dbf2-Mob1, normally kept out of the nucleus by  
92 Crm1, gains access to the nucleus following activation by Cdc15. We further demonstrate that  
93 Dbf2-Mob1 utilizes a nucleolar docking site created by the Polo-like kinase Cdc5 in order to  
94 phosphorylate Cfi1/Net1, resulting in Cdc14 liberation. These findings define the molecular  
95 mechanisms of cross-compartment signal transmission in the MEN and provide a novel  
96 paradigm for how signaling can occur across organelle boundaries.

97

## 98 **RESULTS**

### 99 *Dbf2-Mob1 dynamically associates with SPBs.*

100 When the MEN is activated in anaphase, Dbf2-Mob1 is recruited to the outer plaque of SPBs by  
101 binding to Cdc15-phosphorylated Nud1 (Rock et al., 2013). However, immobilizing Dbf2-Mob1  
102 at SPBs by fusing Mob1 to Nud1 disrupts MEN activity (Rock et al., 2013), suggesting that  
103 Dbf2-Mob1 is likely needed away from the SPBs for the MEN to function. Additionally, a small  
104 fraction of Dbf2-Mob1 was found to enter mitotic nuclei (Stoepel et al., 2005). We thus  
105 hypothesized that the MEN liberates Cdc14 from its nucleolar inhibitor through the dynamic  
106 shuttling of Dbf2-Mob1 between the outer plaque of the SPB and the nucleolus. We reasoned

107 that as a messenger between the SPB and nucleolus, Dbf2-Mob1 needs to be mobile at the SPB.  
108 To test this, we performed fluorescence recovery after photobleaching (FRAP) analysis on eGFP  
109 tagged Mob1 in anaphase cells (Figure 1B). We observed a rapid recovery of fluorescence with a  
110 half-recovery time of  $4.6 \pm 0.7$  s (mean  $\pm$  std,  $n = 6$  cells) after photobleaching of Mob1-eGFP  
111 fluorescence either at the daughter (dSPB) or the mother (mSPB) SPB. This fast turnover rate  
112 ( $\sim 1/500$  of the total duration for Dbf2-Mob1's SPB localization in anaphase) indicates that Dbf2-  
113 Mob1 is highly mobile at SPBs.

114

### 115 ***Dbf2-Mob1 transiently localizes to the nucleolus during anaphase.***

116 We next investigated whether Dbf2-Mob1 localizes to the nucleolus by live-cell fluorescence  
117 microscopy. Although subtle, we observed transient localization of Mob1-eGFP to the nucleolus  
118 in some cells as judged by co-localization with the nucleolar protein Cfi1/Net1. Importantly, this  
119 nucleolar localization was only observed in late anaphase cells after nucleolar segregation, when  
120 the MEN is normally active (Figure 1C).

121 It was reported previously that two N-terminally truncated Mob1 mutant proteins,  
122 Mob1 $\Delta$ 78 and Mob1 $\Delta$ 132 (Mob1 missing the first 78 and 132 amino acids, respectively),  
123 localize more prominently to the nucleus (Stoepel et al., 2005). We found that they also  
124 displayed increased nucleolar localization (Figure 1D-F). We hypothesize that the N-terminus of  
125 Mob1 harbors auto-inhibitory sequences that prevent access of the protein to the nucleolus.  
126 Hence, deleting these sequences ought to cause hyperactivation of Dbf2-Mob1. Indeed, we found  
127 that N-terminal truncation mutants of Mob1 partially suppressed temperature sensitive alleles of  
128 upstream MEN components (*cdc15-2* and *tem1-3*; Figure S1B). This suppression was not a result  
129 of elevated Mob1 protein levels because overexpression of Mob1 from the *GPD* promoter did  
130 not suppress the growth defect of *cdc15-2* or *tem1-3* mutants (Figure S1A-B), nor did it increase  
131 Mob1's nucleolar localization (Figure S1C). We conclude that N-terminal truncations result in  
132 enhanced nucleolar localization and hyperactivation of Mob1.

133 To further characterize the cellular localization of Dbf2-Mob1, we quantified the relative  
134 enrichment of full-length and truncated GFP-Mob1 at SPBs and in the nucleolus during the cell  
135 cycle (Figure 1E). Full-length Mob1 localized to SPBs and the nucleolus during anaphase.  
136 Mob1 $\Delta$ 78's localization to SPBs was similar to that of full-length Mob1 while Mob1 $\Delta$ 132's  
137 dissociation from SPBs was slightly delayed. The nucleolar localization of Mob1 and truncated

138 Mob1 (Figure 1E) correlated with MEN activation, as judged by Mob1 association with SPBs,  
139 translocation of the MEN activity reporter NLS<sub>Cdc14</sub> (Campbell et al., 2019) into the cytoplasm,  
140 and Cdc14 release from the nucleolus (Figure S2). Consistent with earlier observations, the  
141 Mob1 truncations displayed significantly greater nucleolar enrichment relative to full-length  
142 Mob1 in anaphase (~30% and 120% increase on average for Mob1 $\Delta$ 78 and Mob1 $\Delta$ 132  
143 respectively, Figure 1F). Mob1 $\Delta$ 78 localization to the nucleolus was, like full-length Mob1,  
144 restricted to anaphase but accumulated in the nucleolus to higher levels. In contrast, Mob1 $\Delta$ 132  
145 displayed both greater and earlier nucleolar enrichment, evident already in metaphase. We  
146 conclude that Dbf2-Mob1 localizes to the nucleolus during anaphase when the MEN is active. N-  
147 terminal truncation mutants of Mob1 exhibit enhanced nucleolar localization and are  
148 hypermorphic. Given that the nucleolar localization of full-length Mob1 is quite subtle, we used  
149 the Mob1 truncation mutants as tools to study Dbf2-Mob1's nucleolar localization.

150

#### 151 ***Dbf2-Mob1 localizes to the nucleolus through interacting with Cfi1/Net1.***

152 To validate the nucleolar localization of Mob1 we observed by microscopy and to identify the  
153 potential nucleolar receptor for Dbf2-Mob1, we performed TurboID proximity-based labeling  
154 (Branon et al., 2018). We fused the promiscuous biotin ligase TurboID to the MEN components  
155 Mob1, Dbf2, Tem1 and Cdc15, and identified their protein interactors by streptavidin pull-down  
156 followed by mass spectrometry (MS) (Figure S3A). In this experiment, we identified the  
157 nucleolar protein Cfi1/Net1 as the top hit for Mob1- and Dbf2-TurboID labeling (Figure 2A,  
158 S3B, Table S3). Biotinylation of Cfi1/Net1 by Mob1-TurboID was further confirmed by the  
159 detection of a biotinylated peptide of Cfi1/Net1 (Figure S3C). Importantly, Cfi1/Net1 was only  
160 detected in the labeling experiments where Mob1 or Dbf2 were tagged with TurboID but not  
161 when Tem1 or Cdc15 were used as baits (Figure 2A). In contrast, Nud1, the MEN scaffold  
162 protein at SPBs, was detected in the TurboID labeling experiments for all MEN proteins (Figure  
163 2A).

164 We validated these MS findings using streptavidin gel-shift assays (Fairhead and  
165 Howarth, 2015; Housley et al., 2014). To monitor whether a target protein was biotinylated by  
166 the TurboID-tagged bait protein *in vivo*, we treated the denatured cell lysates with excess  
167 streptavidin prior to immunoblotting. Biotinylated form(s) of the target protein will migrate more  
168 slowly in SDS-PAGE due to binding of streptavidin, with each added biotin molecule causing a

169 theoretical size increase of up to 53 kD, the size of a streptavidin tetramer (Figure S3D). Using  
170 this assay, we observed a slower migrating form of Nud1 in cell lysates from cells expressing all  
171 TurboID-tagged MEN proteins (Figure 2B). Slower migrating forms of Cfi1/Net1 were only  
172 observed in lysates obtained from cells expressing Mob1-TurboID (Figure 2B).

173 To determine whether Cfi1/Net1 was the sole receptor for Mob1 in the nucleolus, we  
174 characterized the localization of Mob1 $\Delta$ 78 and Mob1 $\Delta$ 132 in cells lacking *CFII/NET1*. While  
175 still localized to SPBs, Mob1 $\Delta$ 78 and Mob1 $\Delta$ 132 no longer accumulated in the nucleolus during  
176 anaphase in *cfi1/net1* $\Delta$  cells (Figure 2C-D). Furthermore, when we overexpressed *CFII/NET1*  
177 from the strong galactose-inducible *GALI-10* promoter, nucleolar localization of both full-length  
178 and N-terminal truncation mutants of Mob1 was increased by at least 50% (full-length) up to  
179 300% (truncations) (Figure 2E-F). Interestingly, this increase in nucleolar localization was  
180 accompanied by a decrease in Mob1's SPB localization (Figure 2F). We conclude that Dbf2-  
181 Mob1 localization in the nucleolus during anaphase is mediated by interactions with Cfi1/Net1.

182

### 183 ***Nucleolar localization of Dbf2-Mob1 depends on MEN activation.***

184 The localization pattern of Dbf2-Mob1 leads to the model where Dbf2-Mob1 is activated by  
185 Cdc15 at SPBs. Active Dbf2-Mob1 then binds to and phosphorylates Cfi1/Net1, promoting the  
186 dissociation of Cdc14 from its inhibitor to carry out mitotic exit. This model predicts that the  
187 nucleolar localization of Dbf2-Mob1 depends on MEN activity. To test this prediction, we  
188 employed an analog-sensitive allele of *CDC15*, *cdc15-as1* (Bishop et al., 2000; D'Aquino et al.,  
189 2005). As expected, inhibition of *cdc15-as1* (through addition of the analog 1-NA-PP1)  
190 prevented localization of Mob1 to SPBs and translocation of the MEN activity reporter NLS<sub>Cdc14</sub>  
191 into the cytoplasm (Figure 3A). Nucleolar localization of full-length Mob1 was also significantly  
192 reduced (Figure 3A). Nucleolar localization of the N-terminally truncated Mob1 $\Delta$ 78 and  
193 Mob1 $\Delta$ 132 mutants, on the other hand, was only moderately reduced (Figure 3A), which is  
194 consistent with the finding that these alleles partially suppress the temperature sensitive growth  
195 defect of *cdc15-2* cells (Figure S1B). We conclude that Mob1 localization to the nucleolus  
196 depends on MEN activity. The N-terminal hyperactive truncation mutations in Mob1 are less  
197 reliant on upstream MEN kinases for their nucleolar localization.

198

### 199 ***Cdc15 regulates nuclear access of Dbf2-Mob1.***

200 How does Cdc15 cause Dbf2-Mob1 to localize to the nucleolus? To reach the nucleolus, Dbf2-  
201 Mob1 must first enter the nucleus. Considering that the size of the complex (102 kD) is above  
202 the passive diffusion limit of the nuclear envelope (~40-60 kD) (Knockenbauer and Schwartz,  
203 2016), we hypothesized that nuclear access of Dbf2-Mob1 is regulated. We explored this  
204 possibility using the PhyB-PIF based light-inducible organelle targeting system (Yang et al.,  
205 2013) (Figure S4A). We fused Mob1-eGFP to the PIF protein, which binds PhyB upon exposure  
206 to red light (650 nm). Using this system, we successfully recruited Mob1-eGFP-PIF to various  
207 subcellular locations such as SPBs or the outer mitochondrial membrane (Figure S4B).

208 To gauge Dbf2-Mob1's nuclear access in different cell cycle stages, we created a trap for  
209 nuclear Dbf2-Mob1 using nucleolar-anchored PhyB (PhyB-Sik1, Figure 3B). If Dbf2-Mob1 was  
210 shuttling between the nucleus and cytoplasm, PhyB-Sik1 would capture nuclear Mob1-eGFP-PIF  
211 when activated by light. Interestingly, in pre-anaphase cells, we were not able to capture a  
212 notable amount of nuclear Dbf2-Mob1 after 2 minutes of red-light activation. In contrast, in  
213 anaphase cells in which the MEN is active, Dbf2-Mob1 was readily recruited to the nucleolus  
214 within 2 minutes (Figure 3C). We obtained similar results with a Dbf2-PIF fusion (Figure S4C).  
215 Furthermore, when we activated PhyB every 15 minutes for 2 minutes to recruit Mob1 to the  
216 nucleolus in cells progressing through the cell cycle, Mob1 was only recruited to the nucleolus  
217 by light during anaphase when the protein was also present at SPBs (Figure S4D). By  
218 comparison, we were not able to recruit the upstream kinase Cdc15 to the nucleolus in any cell  
219 cycle stage (Figure S4C). Given that (1) Dbf2-Mob1 protein levels do not fluctuate considerably  
220 during the cell cycle (Visintin and Amon, 2001), that (2) the interaction between other PIF  
221 fusions and PhyB-Sik1 are not cell cycle regulated (Yang et al., 2013) and that (3) Mob1 can be  
222 recruited to cytoplasmic targets throughout the cell cycle (Figure S4B), we conclude that nuclear  
223 access of Dbf2-Mob1 is cell cycle regulated.

224 Because nuclear access of Dbf2-Mob1 correlates with MEN activation, we next tested  
225 whether it was regulated by the MEN by quantifying the relative enrichment of Mob1 in the  
226 nucleolus as a function of PhyB activation time (exposure to 650 nm light) in *CDC15* or *cdc15-2*  
227 cells. In cells with wild-type *CDC15*, light-induced nucleolar recruitment of Mob1 was higher in  
228 anaphase than pre-anaphase cells. In contrast, in *cdc15-2* cells this difference was abolished  
229 (Figure 3D). We conclude that in addition to activating Dbf2's kinase activity (Mah et al., 2001),  
230 Cdc15 regulates Dbf2-Mob1's nuclear access. Consistent with this notion, we find that

231 Mob1 $\Delta$ 78, which partially suppresses the temperature sensitivity of the *cdc15-2* allele, displayed  
232 increased nuclear access in all cell cycle stages (Figure S4E).

233

### 234 ***Dbf2-Mob1 is exported from the nucleus by Crm1.***

235 Dbf2-Mob1 is a substrate of the nuclear exportin Crm1 *in vitro* (Kırlı et al., 2015). To  
236 determine whether Crm1 plays a role in controlling Dbf2-Mob1 localization *in vivo*, we  
237 quantified the nucleolar localization of full-length and truncated Mob1 in cells carrying an allele  
238 of *CRM1* (*crm1T539C*) that is sensitive to the nuclear export inhibitor leptomycin B (LMB)  
239 (Neville, 1999). Treatment of *crm1T539C* cells with LMB led to an increase in nucleolar  
240 localization of both full-length and N-terminally truncated Mob1 (Figure S5A), suggesting that  
241 Crm1 controls nuclear export of Dbf2-Mob1.

242 Crm1 recognizes substrates with a leucine-rich nuclear export signal (NES). To test  
243 whether there was a functional NES in Dbf2 or Mob1, we overexpressed Dbf2 or Mob1 from the  
244 galactose-inducible *GALI-10* promoter. Overexpressed Mob1 was enriched in the nucleus  
245 (Figure S5B) similar to what we observed for *pGPD-GFP-MOB1* (Figure S1C). In contrast,  
246 when we overexpressed Mob1 together with Dbf2, Mob1 was no longer nuclear enriched,  
247 suggesting that Dbf2 not Mob1 harbors a NES. Consistently, when overexpressed on its own,  
248 Dbf2 exhibited diffuse localization but inhibition of *crm1T539C* with LMB led to accumulation  
249 of Dbf2 in the nucleus (Figure S5C).

250 Sequence analysis identified a putative NES sequence in the N-terminus of Dbf2  
251 beginning with L12 (Figure S5D). Incidentally, we noticed that this leucine was mutated to  
252 methionine in a previously isolated hyperactive allele of *DBF2* (*DBF2-HyA*) (Geymonat et al.,  
253 2009). Dbf2-HyA, when overexpressed, was nuclear enriched (Figure S5E). Inspired by this  
254 observation, we overexpressed *DBF2* mutants where L12 had been mutated to either methionine  
255 (*dbf2-L12M*) or alanine (*dbf2-L12A*). Both mutants accumulated in the nucleus (Figure S5E).  
256 Furthermore, we found that the first 23 amino acids of Dbf2 were sufficient to drive nuclear  
257 export of eGFP (Figure S5E, G). To test whether the NES in Dbf2 influences Dbf2-Mob1's  
258 nucleolar localization in anaphase under normal expression level, we characterized Mob1's  
259 cellular localization in *dbf2-L12A* and observed an increase in nucleolar localization by at least  
260 40% for both full-length and N-terminally truncated Mob1 (Figure 3E).



261 A previous phospho-proteomics study reported that S17 and S20 within the NES of Dbf2  
262 are phosphorylated in anaphase-arrested cells (Holt et al., 2009). We found that mutating S17  
263 and S20 to phospho-mimetic residues (S17,20D or S17,20E) disrupted the NES while mutating  
264 these residues to alanine (S17,20A) retained the NES activity of Dbf2 (Figure S5F, G). We  
265 propose that phosphorylation of S17 and S20 is regulated, possibly by Cdc15, to control nuclear  
266 access of Dbf2-Mob1. This is consistent with the observation that *dbf2-S17,20A* exacerbated the  
267 temperature sensitivity of *cdc15-2* (Figure S6A). In addition, nucleolar localization of Mob1,  
268 particularly of Mob1 $\Delta$ 78, was reduced in cells harboring the *dbf2-S17,20A* allele compared to  
269 cells with wild-type *DBF2* (Figure S6B). However, cells carrying the *dbf2-S17,20A* allele, while  
270 exhibiting reduced nuclear access of Mob1 during all cell cycle stages, still showed differential  
271 nuclear access between pre-anaphase and anaphase, as is observed in *DBF2* cells (Figure S6C).  
272 This observation suggests that additional regulatory mechanism(s) control Dbf2-Mob1's nuclear  
273 access. In contrast, cells harboring the *dbf2-S17,20D* allele exhibited increased nuclear access of  
274 Mob1 during all cell cycle stages (Figure S6C), confirming that Dbf2-Mob1 is normally kept out  
275 of the nucleus through Dbf2's NES. The NES sequence in Dbf2 is well conserved among  
276 *Saccharomyces* (Figure S5D) suggesting that regulated nuclear access of Dbf2-Mob1 is  
277 conserved at least across this class of fungi.

278

### 279 ***Nucleolar localization of Dbf2-Mob1 is regulated by Cdc5.***

280 The analysis of nuclear access and nucleolar localization of the N-terminal truncations of Mob1  
281 indicated that the MEN is not the only pathway controlling Dbf2-Mob1's nucleolar localization.  
282 The truncation mutants localize to the nucleolus in a manner largely independent of the MEN,  
283 yet their nucleolar localization is still restricted to metaphase and anaphase (Figure 3A). This  
284 restriction of nucleolar localization is not due to limited nuclear access. Truncated Mob1 mutants  
285 have increased nuclear access prior to anaphase (Figure S4E). These data indicate that nucleolar  
286 localization or the interaction between Dbf2-Mob1 with Cfi1/Net1 is regulated by additional  
287 factors.

288 An obvious candidate for this additional regulator is the Polo-like kinase Cdc5, which is  
289 active throughout mitosis and plays multiple essential roles in mitotic exit (Lee et al., 2005). As  
290 part of both the FEAR network (Rock and Amon, 2009; Stegmeier et al., 2002) and the MEN,  
291 Cdc5 is indispensable for Cdc14's nucleolar release. However, the exact role(s) of Cdc5 during

292 this process is not fully understood. To determine whether Cdc5 regulated binding of Dbf2-  
293 Mob1 to Cfi1/Net1, we examined the consequences of inhibiting Cdc5's kinase activity on  
294 nucleolar localization of Dbf2-Mob1 using an analog-sensitive allele of *CDC5* (*cdc5-as1*).  
295 Consistent with the known functions of Cdc5 in MEN activation, we observed loss of Mob1's  
296 SPB localization and Dbf2-Mob1's kinase activity as monitored by translocation of the NLS<sub>Cdc14</sub>  
297 reporter into the cytoplasm when Cdc5 was inhibited (Figure 4A). Nucleolar localization of  
298 Mob1, Mob1 $\Delta$ 78 and Mob1 $\Delta$ 132 was also lost in cells lacking Cdc5 activity (Figure 4A). This is  
299 in direct contrast to Cdc15 inhibition, where the nucleolar localization of N-terminal Mob1  
300 truncation mutants particularly Mob1 $\Delta$ 132 was only partially reduced (Figure 3A). These results  
301 suggested that Cdc5 regulates Dbf2-Mob1's nucleolar localization independently of its role in  
302 activating Cdc15.

303 To directly determine whether *CDC5* regulated Dbf2-Mob1's nucleolar localization  
304 independently of the MEN, we took advantage of a hyperactive *CDC15* allele, *GAL-CDC15(1-*  
305 *750)* (Bardin et al., 2003), which is active even in the absence of *CDC5* (Rock and Amon, 2011).  
306 When *GAL-CDC15(1-750)* was expressed, Mob1's SPB localization and Dbf2-Mob1's kinase  
307 activity was no longer restricted to anaphase but rather was high throughout the cell cycle as a  
308 result of MEN hyper-activation (Figure 4B). Interestingly, *GAL-CDC15(1-750)* did not abolish  
309 cell-cycle regulation of Mob1's nucleolar localization but rather advanced it to early anaphase  
310 and metaphase (Figure 4B). In cells expressing *GAL-CDC15(1-750)*, inactivation of *CDC5* still  
311 abolished nucleolar localization of both full-length and the hyperactive N-terminally truncated  
312 Mob1 while Mob1 binding to SPBs was unaffected (Figure 4B). These results demonstrate that  
313 nucleolar localization of Dbf2-Mob1 directly depends on Cdc5 independently of its role in MEN  
314 activation.

315 Could *CDC5* regulate the nucleolar localization of Dbf2-Mob1 through its role in the  
316 FEAR network? To test this, we quantified Mob1's nucleolar localization in cells lacking the  
317 FEAR network component *SLK19* (*slk19 $\Delta$ ) or carrying a temperature sensitive allele of the  
318 FEAR network effector *CDC14* (*cdc14-3*). MEN activation (as determined by Mob1 localization  
319 to the dSPB and nuclear release of the NLS<sub>Cdc14</sub> reporter) and as a result mitotic exit were  
320 considerably delayed and more variable in *slk19 $\Delta$  cells (Figure S7A). Consistent with a delay in  
321 MEN activation, nucleolar localization of Mob1 and Mob1 $\Delta$ 78 but not Mob1 $\Delta$ 132 was also  
322 delayed. Importantly, maximum enrichment of Mob1 in the nucleolus was not reduced in *slk19 $\Delta$***



323 cells for all three forms of Mob1 (Figure S7A). We observed similar results in *cdc14-3* mutants  
324 (Figure S7B). We conclude that Cdc5 regulates Dbf2-Mob1's nucleolar localization through  
325 mechanisms in addition to its role in the MEN and the FEAR network.

326

### 327 ***Cdc5 and Dbf2-Mob1 phosphorylate Cfi1/Net1 at distinct sites.***

328 Our results suggest a model where Cdc5 promotes the interaction between Dbf2-Mob1 and its  
329 nucleolar receptor Cfi1/Net1, likely through phosphorylating Cfi1/Net1. This interaction then  
330 facilitates phosphorylation of Cfi1/Net1 by Dbf2-Mob1 to bring about the release of Cdc14 from  
331 Cfi1/Net1. Cfi1/Net1 is a highly phosphorylated protein with 64 known phosphorylation sites *in*  
332 *vivo* (Holt et al., 2009; Swaney et al., 2013). About one fifth of these sites were identified as  
333 CDK targets (Holt et al., 2009) including six key CDK sites whose phosphorylation is controlled  
334 by the FEAR network (Azzam, 2004). To map sites in Cfi1/Net1 that are phosphorylated in a  
335 *CDC5* or MEN-dependent manner, we performed phosphoproteomics analyses on wild-type  
336 anaphase cells and cells in which Cdc5 or Cdc15 were inhibited using the *cdc5-as1* and *cdc15-*  
337 *as1* alleles, respectively (Figure S8A). This analysis identified 44 of the 64 previously known  
338 sites in Cfi1/Net1 and 18 new sites (Table S4). To achieve complete or close to complete  
339 coverage of Cfi1/Net1's phosphorylation sites in anaphase, we also performed  
340 immunoprecipitation-mass spectrometry (IP-MS) for Cfi1/Net1 in anaphase enriched cultures  
341 and identified 9 additional sites (Table S4) resulting in an astonishing total of 91 phosphorylation  
342 sites in Cfi1/Net1. These phosphorylation sites appear to cluster in regions of disorder as  
343 predicted by the PONDR score (Romero et al., 1997) (Figure 5A).

344 By comparing the peptide signals between wild-type, *cdc15-as1* and *cdc5-as1* cells in our  
345 quantitative phosphoproteomics dataset, we identified phosphorylation sites that depended on  
346 Cdc15 or Cdc5 activity or both (Figure S8B-E). Among them, we found 11 *CDC15*-dependent  
347 and 22 *CDC5*-dependent sites in Cfi1/Net1. Six of the *CDC15*-dependent sites fit Dbf2-Mob1's  
348 preferred sequence motif RXXS\* (\* represents the phosphorylation site) (Mah et al., 2005),  
349 supporting our model that Dbf2-Mob1 phosphorylates Cfi1/Net1. Given that Cdc5 activates  
350 Cdc15, sites that depended on *CDC15* ought to also depend on *CDC5*. This was indeed the case  
351 for 10 of the 11 *CDC15*-dependent phosphorylation sites in Cfi1/Net1.

352 To identify sites that only depended on *CDC5* but not *CDC15*, we subtracted *CDC15*-  
353 dependent sites from *CDC5*-dependent sites yielding 12 sites (denoted as *CDC5*-only, Figure

354 5A). Based on the distribution of all 91 phosphorylation sites and degree of disorder, we divided  
355 Cfi1/Net1 into four zones: residues 31-69 (z1, 7 sites), 160-615 (z2, 53 sites), 676-840 (z3, 12  
356 sites) and 1017-1166 (z4, 19 sites) (Figure 5A). *CDC15*-dependent phosphorylation sites were  
357 concentrated in zone 2, whereas *CDC5*-dependent sites were also found in zones 1 and 3. In  
358 contrast to Cfi1/Net1, all the *CDC5*-dependent phosphorylation sites in Dbf2 and Mob1 were  
359 also *CDC15*-dependent (Figure S8F). These data indicate that Cdc5 and Dbf2-Mob1 directly  
360 phosphorylate Cfi1/Net1. Dbf2-Mob1 on the other hand is a direct substrate of Cdc15 but not  
361 Cdc5.

362

### 363 ***Cdc5 promotes Dbf2-Mob1's nucleolar localization by phosphorylating Cfi1/Net1.***

364 Having identified the phosphorylation sites within Cfi1/Net1 we next asked whether they were  
365 important for the interaction between Cfi1/Net1 and Dbf2-Mob1. We generated a *CFII* allele in  
366 which all 91 phosphorylation sites were mutated to alanine (*cfi1-91A*). Cells harboring this allele  
367 as the sole source of *CFII/NET1* were viable and progressed through anaphase with only a slight  
368 delay in mitotic exit as judged by the timing of Mob1's dissociation from the SPBs (Figure 5B).  
369 Interestingly, Mob1 $\Delta$ 132, which showed the most pronounced nucleolar localization among all  
370 Mob1 alleles analyzed, still localized to the SPBs during anaphase in *cfi1-91A* cells, but failed to  
371 accumulate in the nucleolus (Figure 5B-C, S9A). We conclude that Cfi1/Net1 phosphorylation is  
372 required for interacting with Dbf2-Mob1.

373 Next, we tested whether *CDC5*-dependent phosphorylation of Cfi1/Net1 regulated Dbf2-  
374 Mob1's nucleolar localization. We focused our analysis on zone 2 of Cfi1/Net1 because previous  
375 studies had shown that the first 621 amino acids of the protein are sufficient to confer Cdc14  
376 regulation (Azzam, 2004). We further note that mutating phosphorylation sites in zone 1 and 3 of  
377 Cfi1/Net1 did not affect the nucleolar localization of Mob1 $\Delta$ 132 (Figure 5B-C, S9A). We  
378 generated a *CFII/NET1* allele with mutated phosphorylation sites in zone 2 that were  
379 phosphorylated in a *CDC5*-dependent but *CDC15*-independent manner (henceforth *cfi1-*  
380 *Cdc5only(z2)*). For comparison we generated a *CFII/NET1* allele in which we only mutated sites  
381 that were phosphorylated in a *CDC15*-dependent manner (henceforth *cfi1-Cdc15(z2)*). Analysis  
382 of Mob1 $\Delta$ 132 localization in these mutants revealed that, similar to inhibition of Cdc5, *cfi1-*  
383 *Cdc5only(z2)* abolished the nucleolar localization of Mob1 $\Delta$ 132, while *cfi1-Cdc15(z2)* slightly  
384 increased nucleolar localization of the protein (Figure 5D-E, S9B). To validate these findings, we

385 performed TurboID labeling experiments followed by Streptavidin gel-shift assays to probe the  
386 interaction between TurboID tagged full-length Mob1 and 13Myc tagged Cfi1/Net1. The slower  
387 migrating form corresponding to biotinylated Cfi1/Net1 was absent in cells expressing *cfi1-*  
388 *Cdc5only(z2)* but present in cells expressing *CFI* or *cfi1-Cdc15(z2)* (Figure 5F). We conclude  
389 that phosphorylation of Cfi1/Net1 by Cdc5 is required for Dbf2-Mob1 binding to the protein.

390 Three lines of evidence indicate that Cdc5 directly phosphorylates Cfi1/Net1. First,  
391 consistent with the finding that Cdc5 is already active in metaphase, 10 out of 12 *CDC5*-only  
392 sites identified in anaphase cells are already phosphorylated in cells arrested in metaphase using  
393 the microtubule depolymerizing drug nocodazole (Figure S10) with 6 of them also determined to  
394 be *CDC5*-dependent in metaphase (Figure S10E). Second, we found considerable overlap  
395 between *CDC5*-dependent phosphorylation sites *in vivo* and sites identified *in vitro* (Loughrey  
396 Chen et al., 2002; Shou et al., 2002). Four out of five *in vivo* Cdc5only sites in region 1-341 were  
397 previously found to be phosphorylated by Cdc5 *in vitro* (Table S4). Third, Cdc5 and Cfi1/Net1  
398 interact with each other *in vivo* as determined by TurboID labeling (Figure S11A). The  
399 biotinylation of Cfi1/Net1 by Cdc5-TurboID was further confirmed by the detection of  
400 biotinylated peptides in Cfi1/Net1 as well as the streptavidin gel-shift assay (Figure S11B-C).  
401 We conclude that Cdc5 phosphorylates Cfi1/Net1 at the onset of metaphase which serves as a  
402 priming event for Dbf2-Mob1 binding to Cfi1/Net1 in anaphase. We note that these findings also  
403 explain why Mob1 $\Delta$ 132's nucleolar localization is already evident in metaphase (Figure 4B).

404

405 ***Dbf2-Mob1 promotes the release of Cdc14 from the nucleolus through Cdc5-mediated priming***  
406 ***of Cfi1/Net1.***

407 To determine whether the *CDC5* and MEN-dependent phosphorylation sites in Cfi1/Net1  
408 regulate the interaction between Cfi1/Net1 and Cdc14 as our model predicted, we examined the  
409 consequences of disrupting these phosphorylation sites on the release of Cdc14 from the  
410 nucleolus. We first determined which region of Cfi1/Net1 was mediating phospho-regulation of  
411 this interaction. We mutated all phosphorylation sites in the individual zones as well as in  
412 combination and analyzed the effects on Cdc14 release from the nucleolus (Figure S12A-B).  
413 This analysis revealed that only phosphorylation in zone 2 controlled Cdc14 release from  
414 Cfi1/Net1 (Figure S12A-B). It is important to note that mutating the phosphorylation sites in  
415 zone 2 also affected the ability of Cfi1/Net1 to bind Cdc14, as judged by the lower degree of

416 Cdc14 nucleolar sequestration prior to anaphase and localization of Cdc14 to the dSPB prior to  
417 anaphase (Figure S12C). This finding indicates that the same residues involved in regulating the  
418 interaction between Cfi1/Net1 and Cdc14 are also important for forming the complex in the first  
419 place and mutating them to alanine weakens this interaction. Alternatively, mutating so many  
420 residues at once (53 sites in zone 2) could change the structure of Cfi1/Net1 and thus disrupt  
421 binding to Cdc14. Nevertheless, the increased level of free Cdc14 in the cell with *cfi1-91A* and  
422 the zone 2-phosphomutant explains why such severe defect in Cdc14 release from the nucleolus  
423 did not cause a significant anaphase delay as assayed by the kinetics of Cdc14 re-sequestration.

424 Next, we examined kinase-specific phospho-mutants in Cfi1/Net1. There are three known  
425 kinases that phosphorylate Cfi1/Net1 to regulate binding to Cdc14: mitotic CDKs (mainly Clb2-  
426 Cdk1), Cdc5 and Dbf2-Mob1. CDK phosphorylation of Cfi1/Net1 during early anaphase  
427 underlies FEAR network-dependent release of Cdc14 from its inhibitor (Azzam, 2004). In FEAR  
428 network mutants such as *slk19Δ*, Cdc14 release from the nucleolus and anaphase progression are  
429 delayed and are accompanied by increased cell-to-cell variability (Figure 6A). As reported  
430 previously (Azzam, 2004), cells harboring a *CFII/NET1* allele with 6 CDK sites mutated to  
431 alanine, *cfi1/net1-6Cdk*, caused Cdc14 release defects similar to those of FEAR network mutants  
432 (Figure 6B).

433 Inactivation of the MEN using the *cdc15-as1* allele led to the previously described  
434 pattern of Cdc14 localization, where Cdc14 is initially released from the nucleolus by the FEAR  
435 network during early anaphase but is then re-sequestered in the nucleolus during later stages of  
436 anaphase (Stegmeier et al., 2002) (Figure 6A). Mutating the *CDC15*-dependent phosphorylation  
437 sites in zone 2 (*cfi1-Cdc15(z2)*) resulted in a significant reduction of Cdc14 release from the  
438 nucleolus but only recapitulated ~50% of the effect of inactivating *CDC15* (compare Figure 6A  
439 and B). As previously reported (Visintin et al., 2008), inhibition of the analog sensitive *cdc5-as1*  
440 allele caused defects in both FEAR network and MEN-mediated release of Cdc14 from the  
441 nucleolus (Figure 6A). Mutating the *CDC5*-only phosphorylation sites in zone 2 (*cfi1-*  
442 *Cdc5only(z2)*) resulted in a similar reduction of Cdc14 release from the nucleolus (Figure 6B).  
443 Finally, combining *cfi1-Cdc5only(z2)* with *cfi1-Cdc15(z2)* (*cfi1-Cdc15&Cdc5(z2)*) caused an  
444 even greater defect in Cdc14 release from the nucleolus than either mutant alone (Figure 6B,  
445 S13). These results confirmed our model where Cdc5, in addition to activating the MEN, directly

446 phosphorylates Cfi1/Net1 to target Dbf2-Mob1 to Cfi1/Net1. Phosphorylation of Cfi1/Net1 by  
447 Dbf2-Mob1 then promotes the dissociation of Cdc14 from Cfi1/Net1.

448

449 ***Phosphorylation of Cfi1/Net1 by Cdc5 and Dbf2-Mob1 promotes mitotic exit.***

450 Preventing the dissociation of Cdc14 from its inhibitor during anaphase ought to interfere  
451 with mitotic exit. Indeed, we observed a delay in all mutants analyzed (Figure 6C, S14). Both  
452 *cfi1-Cdc15(z2)* and *cfi1-Cdc5only(z2)* mutant cells exited mitosis with an average delay of ~6  
453 minutes (~25% increase, Figure 6C, S14C). In addition, consistent with Cdc5's role in the FEAR  
454 network, we observed a significant delay in nucleolar segregation in *cfi1-Cdc5only(z2)* mutant  
455 cells (Figure 6C, S14C). Surprisingly, *cfi1-Cdc15&Cdc5(z2)* double mutant cells which had the  
456 most severe defect in Cdc14 release from the nucleolus exhibited a similar delay in mitotic exit  
457 as the *cfi1-Cdc15(z2)* and *cfi1-Cdc5only(z2)* single mutants and a less severe defect in nucleolar  
458 segregation compared to *cfi1-Cdc5only(z2)* (Figure 6C). This relatively short delay in mitotic  
459 exit is likely due to the fact that Cdc14 was not tightly sequestered in this mutant prior to  
460 anaphase. We observed elevated levels of Cdc14 at dSPB in both *cfi1-Cdc15(z2)* and *cfi1-*  
461 *Cdc15&Cdc5(z2)* cells prior to anaphase (Figure 6D, S13). It appears that mutating *CDC15-*  
462 dependent sites in Cfi1/Net1 interferes with its ability to bind Cdc14. Nonetheless, the majority  
463 (>60%) of Cdc14 was not released during anaphase in cells harboring *cfi1-Cdc15&Cdc5*.

464 One possible explanation for the apparently discrepancy between the severity of the  
465 Cdc14 release defect and the more subtle delay in mitotic exit is that in addition to Cfi1/Net1,  
466 MEN also promotes cytoplasmic retention of Cdc14 by phosphorylating its NLS (Mohl et al.,  
467 2009). To determine the contribution of this MEN function to promoting mitotic exit in  
468 *Cfi1/Net1* mutants, we constructed a *CDC14* mutant (*cdc14-3A*) in which all three potential  
469 Dbf2-Mob1 phosphorylation sites capable of driving translocation of the NLS<sub>Cdc14</sub> reporter into  
470 the cytoplasm were mutated to alanine (Figure S15A). Interestingly, cells expressing *cdc14-3A*  
471 instead of *CDC14* exited from mitosis 3 minutes faster (Figure S15B) indicating that cytoplasmic  
472 retention of Cdc14 delays rather than promotes mitotic exit.

473 Another possibility is that some MEN-dependent phosphorylation sites in Cfi1/Net1  
474 eluded our MS analysis. However, given that Cdc14 is a potent phosphatase, we favor the idea  
475 that, incomplete sequestration of Cdc14 prior to anaphase and the residual release of Cdc14 from  
476 the nucleolus during anaphase combined with a functional FEAR network-mediated release of

477 Cdc14 from the nucleolus during early anaphase is sufficient to promote exit from mitosis with  
478 only a modest delay in the *cfi1-Cdc15&Cdc5* mutant. Consistent with this idea, we found that the  
479 *cfi1-Cdc5only(z2)* mutant, which does not display defects in sequestering Cdc14 prior to  
480 anaphase, was synthetic lethal with the FEAR network mutants *slk19Δ* and *spo12Δ* (Figure 6E).  
481 We conclude that CDC5 and MEN-dependent phosphorylation of Cfi1/Net1 controls the  
482 protein's binding to Cdc14 and exit from mitosis.

483

## 484 **DISCUSSION**

485 As a model system for mitotic exit control and cellular signaling in eukaryotes, the MEN has  
486 been studied extensively for decades. Yet, how the MEN activates its effector Cdc14 to promote  
487 exit from mitosis has remained an enigma. Furthermore, the spatial aspect of signal transmission  
488 in the MEN, namely how a signal generated at the outer plaque of the SPBs in the cytosol  
489 reaches its target in the nucleolus, was largely unexplored. Our study provides mechanistic  
490 insights into these questions and together with prior observations lead to a model for Cdc14  
491 regulation and mitotic exit in budding yeast (Figure 7).

492

### 493 ***The role of the Polo-like kinase Cdc5 in regulating Cdc14 activation.***

494 The Polo-like kinase Cdc5 is essential for Cdc14 activation and is part of both the FEAR  
495 network and the MEN. However, the exact role(s) of Cdc5 in regulating Cdc14's nucleolar  
496 release has remained elusive due to its multiple functions in the MEN and the FEAR network.  
497 Using an allele that bypasses CDC5's role in MEN activation, we revealed a novel function of  
498 Cdc5 as a priming kinase that targets Dbf2-Mob1 to its substrate Cfi1/Net1.

499 It was hypothesized that phosphorylation of Cfi1/Net1 by Cdc5 weakens the interaction  
500 between Cfi1/Net1 and Cdc14. Additional phosphorylation by mitotic CDKs or Dbf2-Mob1  
501 were thought to further reduce the interaction resulting in the dissociation of Cdc14 from its  
502 inhibitor. Our results suggest an alternative model. Instead of, or at least in addition to,  
503 weakening the Cfi1/Net1-Cdc14 interaction, Cdc5 phosphorylation targets Dbf2-Mob1 to  
504 Cfi1/Net1. Mutating the Cdc5-only phosphorylation sites in Cfi1/Net1 abolished nucleolar  
505 enrichment of Dbf2-Mob1 and resulted in a reduction in MEN-mediated dissociation of Cdc14  
506 from Cfi1/Net1. Interestingly, this mutation also caused severe defects in the FEAR network



507 mediated release of Cdc14 from Cfi1/Net1. We thus propose that Cdc5 priming phosphorylation  
508 is required not only for Dbf2-Mob1 to phosphorylate Cfi1/Net1 but also for mitotic CDKs  
509 (Figure 7). Consistent with this hypothesis, we found that most Cdc5 phosphorylation sites in  
510 Cfi1/Net1 are already phosphorylated by Cdc5 in metaphase (Figure S10E). This observation  
511 indicates that the docking site(s) on Cfi1/Net1 for Dbf2-Mob1 (and mitotic CDKs) is already  
512 present in metaphase prior to the activation of the FEAR network and the MEN (Figure 7). This  
513 model is further supported by the observation that inhibition of Cdc5 eliminates CDK mediated  
514 phosphorylation of T212 in Cfi1/Net1 (Azzam, 2004). Cdc5 activity is regulated by the DNA  
515 damage checkpoint (Cheng et al., 1998; Sanchez, 1999). We speculate that making FEAR  
516 network and MEN-mediated release of Cdc14 from the nucleolus dependent on Cdc5's priming  
517 activity ensures that DNA damage has been repaired and the checkpoint silenced prior to exit  
518 from mitosis.

519

### 520 ***The FEAR network and the MEN regulate Cdc14 binding to Cfi1/Net1 by different*** 521 ***mechanisms.***

522 While both mitotic CDKs and Dbf2-Mob1 appear to require CDC5-dependent priming  
523 phosphorylation of Cfi1/Net1, the mechanism whereby mitotic CDKs and Dbf2-Mob1 disrupt  
524 the interaction between Cfi1/Net1 and Cdc14 is quite different. Mitotic CDKs phosphorylate  
525 Cfi1/Net1 mainly on S166, T212, S252, T297 and T304; Dbf2-Mob1 targets sites S259, S295,  
526 S362, S439 and S497 (Figure 5A, Table S4). Given that mitotic CDKs and Dbf2-Mob1 target  
527 different sites, we propose that increasing the acidity of aa160–500 within Cfi1/Net1 rather than  
528 site-specific phosphorylation disrupts the interaction between Cdc14 and its inhibitor. Cfi1/Net1  
529 is an integral part of the nucleolus, which has recently been described as a phase-separated  
530 structure (Feric et al., 2016; Shin and Brangwynne, 2017). Overall phosphorylation rather than  
531 phosphorylation of specific sites has been shown to disrupt interactions within such structures  
532 (Carpenter et al., 2018; Owen and Shewmaker, 2019). Perhaps extraction of Cdc14 from the  
533 nucleolar phase requires a similar mechanism.

534

### 535 ***The MEN as a model for cross-compartment signaling.***

536 The MEN, most closely related to the Hippo pathway, employs most, if not all, of the principles  
537 governing classic receptor tyrosine signaling logic to convey a signal generated at SPBs to the

538 MEN effector Cdc14 in the nucleolus: (1) scaffold assisted signaling (at the SPB), (2) signal  
539 transmission across organelle boundaries - from the cytoplasm to the nucleus, and (3) activation  
540 of the effector in a sub-compartment (the nucleolus). As such, we believe that the molecular  
541 mechanisms governing MEN activity are broadly applicable to intracellular signal transmission  
542 in general.

543

#### 544 ***(1) Dynamic scaffold assisted signaling.***

545 Scaffold assisted assembly of signaling complexes is a widespread phenomenon in eukaryotic  
546 signal transduction cascades (Good et al., 2011). We find that in the MEN, assembly of Cdc15-  
547 (Dbf2-Mob1) signaling complex on the scaffold Nud1 is highly dynamic and this dynamicity is  
548 crucial for effector activation. We propose that this dynamicity also serves to amplify the signal.  
549 Cdc15 is the limiting enzyme of the pathway: it is the least abundant component of the MEN and  
550 hyperactivating Cdc15 increases Dbf2-Mob1's kinase activity by > 40-fold (Rock and Amon,  
551 2011). We further hypothesize that the relatively low affinity of Mob1 for phosphorylated-Nud1  
552 ( $K_d = 2.4 \mu\text{M}$ ; note that for an optimal Mob1 binding phosphopeptide the  $K_d$  is 174 nM) (Rock et  
553 al., 2013) is selected for to facilitate the fast turnover rate of Dbf2-Mob1 at SPBs and thus to  
554 promote release of the kinase and signal amplification. In this model, the binding  
555 affinity/kinetics of kinases to their signaling scaffolds is an important parameter that cells fine-  
556 tune to generate desirable signaling properties of scaffold-assisted signaling pathways.

557

#### 558 ***(2) Regulated compartment access.***

559 Most signals, be they generated outside or within the cell, ultimately, result in a nuclear  
560 response. As such, signals have to be propagated from the cytoplasm into the nucleus. Our  
561 studies have led to the discovery that in the MEN, this nuclear access is cell cycle regulated.  
562 Prior to anaphase, Dbf2-Mob1 is actively exported out of the nucleus by Crm1 through the  
563 conserved NES within the N-terminus of Dbf2. Upon MEN activation, nuclear partitioning of  
564 Dbf2-Mob1 increases, likely a result of both increased nuclear import through modification of  
565 Mob1 and decreased nuclear export through modification of Dbf2.

566 Disrupting the NES resulted in an increase in nuclear/nucleolar localization of Dbf2-  
567 Mob1 in all cell cycle stages, interestingly, including anaphase (Figure 3E). This suggests that  
568 only a small fraction of Dbf2-Mob1 is activated by Cdc15 at any given time during anaphase due



569 to limited levels of Cdc15 as discussed earlier. In addition, active Dbf2-Mob1 is likely needed in  
570 the cytosol to phosphorylate substrates other than Cfi1/Net1 such as those involved in  
571 cytokinesis. We speculate that fine-tuning the balance of nuclear versus cytosolic Dbf2-Mob1,  
572 possibly through maintaining a dynamic shuttling of active Dbf-Mob1 between the nucleus and  
573 cytoplasm, is important for the timing of late cell cycle events. The dynamic shuttling of Dbf2-  
574 Mob1 in combination with the relatively small fraction of active Dbf2-Mob1 would also explain  
575 the absence of visible nuclear translocation of Dbf2-Mob1 upon activation. Interestingly,  
576 mammalian Dbf2, known as LATS which are thought to mainly function in the cytosol (Yu and  
577 Guan, 2013), has been found to localize to the nucleus (Britschgi et al., 2017; Li et al., 2014),  
578 indicating nuclear shuttling of kinases might play a role in Hippo signaling as well.

579

### 580 ***(3) Substrate targeting by priming phosphorylation.***

581 Upon entry into the nucleus, Dbf2-Mob1 specifically functions in the nucleolus to promote the  
582 dissociation of Cdc14 from its inhibitor Cfi1/Net1. Priming phosphorylation by Cdc5 on  
583 Cfi1/Net1 ensures that Dbf2-Mob1 executes this function effectively. Dbf2-Mob1 binds to  
584 Cdc15-phosphorylated Nud1 through Mob1's phosphoserine-threonine binding domain (Rock et  
585 al., 2013). We propose that a similar mechanism mediates the interaction between Dbf2-Mob1  
586 and Cdc5-phosphorylated Cfi1/Net1. This hypothesis is supported by the finding that during  
587 cytokinesis, phosphorylation of Dbf2-Mob1's substrate Hof1 by Cdc5 facilitates the binding of  
588 Hof1 to Mob1 (Meitinger et al., 2011; Rock et al., 2013). Based on our observation that a quarter  
589 of potential Dbf2-Mob1 substrates are also targets of Cdc5 (Figure S8E) we further speculate  
590 that priming phosphorylation by Cdc5 is a general mechanism for targeting Dbf2-Mob1 to its  
591 substrates.

592 It is worth noting that Cdc5's consensus motif with an acidic residue at the -2 position of  
593 the pS/T (Kettenbach et al., 2011; Nakajima et al., 2003) does not fit well with the optimal Mob1  
594 binding motif which prefers Y/F at the -2 position of the pS/T (Rock et al., 2013). This is likely  
595 beneficial as a low affinity between Dbf2-Mob1 and its substrates would increase substrate  
596 turnover and prevent sequestration of active Dbf2-Mob1. This low affinity would also explain  
597 the weak and transient localization of Dbf2-Mob1 in the nucleolus that evaded detection  
598 previously. Mob1's phosphoserine-threonine binding domain is well conserved from yeast to

599 humans (Rock et al., 2013) suggesting that substrate targeting through priming phosphorylation  
600 might occur for LATS-MOB1 in the Hippo pathway as well.

601         Priming phosphorylation is a widely used mechanism to ensure effective kinase action at  
602 a particular site in the cell. Perhaps the best studied example for priming is the Polo-like kinases  
603 whose polo-box domain directs the kinase to specific subcellular structures and substrates that  
604 have been previously phosphorylated by a priming kinase such as CDKs (Elia et al., 2003;  
605 Lowery et al., 2005). Although MAP kinases are mainly directed to their substrates through  
606 specialized docking motifs (Bardwell, 2006; Cargnello and Roux, 2011) without priming, it has  
607 been demonstrated that successive phosphorylation through priming could contribute to the  
608 sensing of MAPK signal duration and strength (Murphy et al., 2002). These examples together  
609 with our findings for Dbf2-Mob1 underscore the importance of priming phosphorylation as a  
610 conserved paradigm for achieving specificity and efficiency in cellular signal transduction.

611

612 **ACKNOWLEDGEMENTS**

613 We thank F. Luca (Philadelphia, USA), R. Deshaies (Caltech, USA), E. Schiebel (ZMBH,  
614 Germany), E. Unal (Berkeley, USA) and J. Haber (Waltham, USA) for strains and reagents; R.  
615 Schiavoni and the Biopolymers & Proteomics Facility at Koch Institute Swanson Biotechnology  
616 Center for processing samples for the TurboID-MS experiments; members of our laboratory for  
617 their critical reading of the manuscript. This work was supported by National Institute of General  
618 Medical Science (GM 118066 to A.A.) and the Eunice Kennedy Shriver National Institute of  
619 Child Health and Human Development (HD085866 to A.A.). X.Z. was supported by a Helen  
620 Hay Whitney postdoctoral fellowship. A.A. is also investigator of the Howard Hughes Medical  
621 Institute and the Paul F. Glenn Center for Biology of Aging Research at MIT.

622

623 **AUTHOR CONTRIBUTIONS**

624 X.Z. and A.A. conceived the study. X.Z. performed all experiments. W.L. and Y.L. provided the  
625 phosphoproteomic analysis. X.Z. and A.A. wrote the manuscript with input from all coauthors.

626

627 **COMPETING INTERESTS**

628 The authors declare no competing interests.

629

630 **FIGURES**

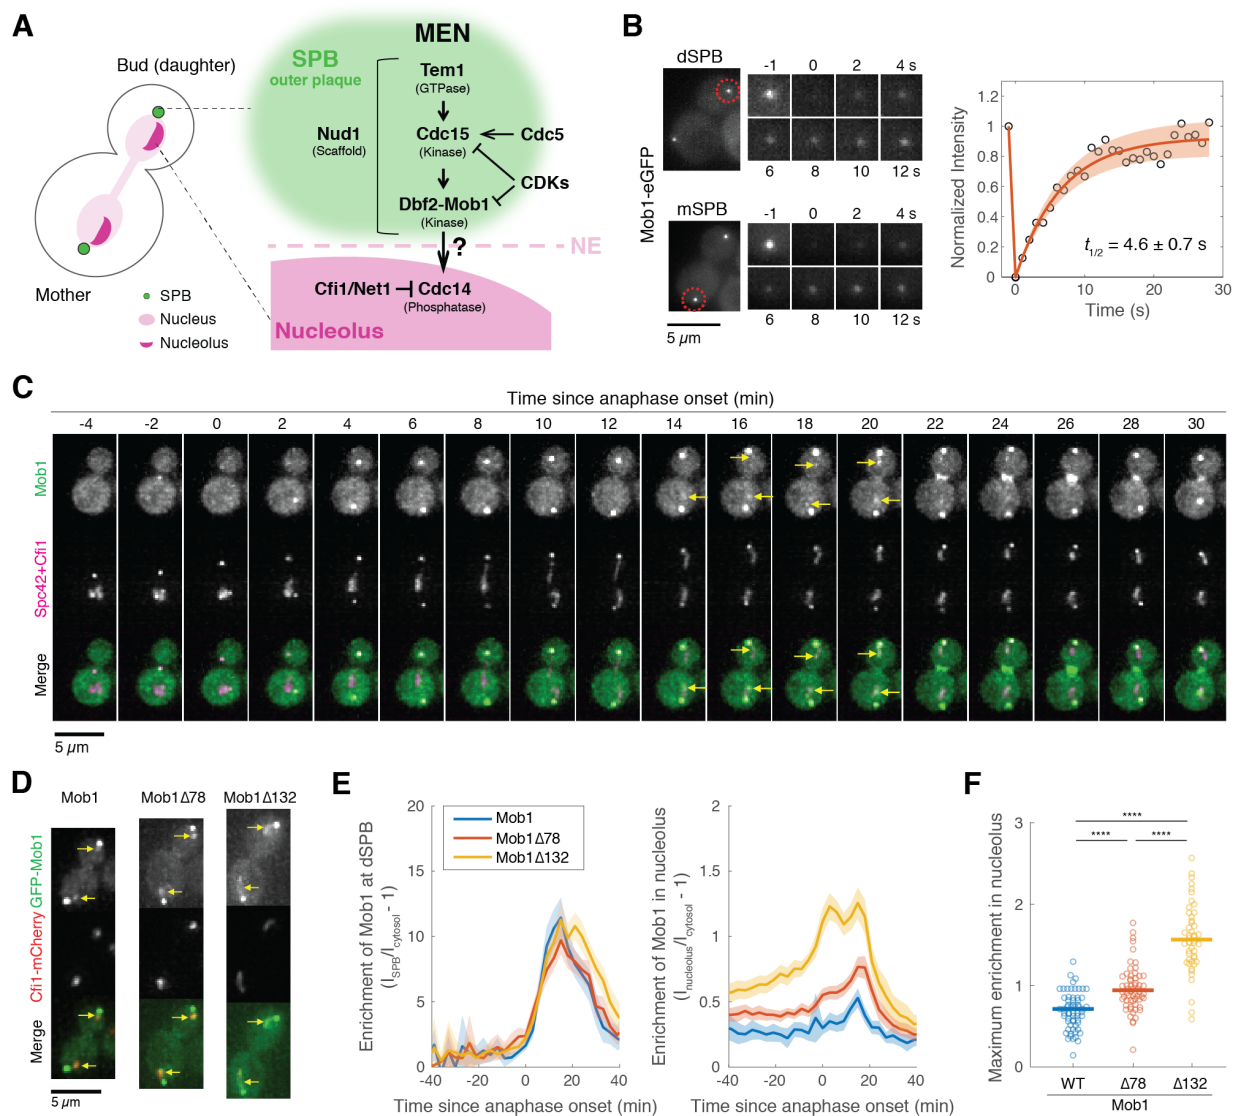

631  
 632 **Figure 1. Dbf2-Mob1 transiently localizes to the nucleolus in late anaphase.**  
 633 (A) Major components of the MEN and their subcellular localization.  
 634 (B) FRAP analysis of Mob1-eGFP (A39695). Red circles indicate the area of photo-bleaching.  
 635 Cells were grown and imaged at room temperature in SC medium + 2% glucose. Graph to the  
 636 right represents average measurements of double normalized fluorescence intensities ( $n = 6$  cells)  
 637 after correcting for photo-bleaching during acquisition. Red curve is the average fit and shaded  
 638 area represents standard deviation (SD) of the fits. Half recovery time  $t_{1/2} \pm$  SD is indicated.

639 (C) Localization of Mob1 during the cell cycle. A40257 (with Mob1-eGFP, Cfi1-mCherry and  
640 Spc42-mCherry) cells were grown at room temperature in SC medium + 2% glucose and imaged  
641 every minute for 2 hours. Arrows highlight the nucleolar localization.

642 (D) Nucleolar localization of full-length (A39931) and N-terminally truncated (A39933 and  
643 A39935) Mob1. Cells were grown at room temperature in SC medium + 2% glucose and imaged  
644 every 3 minutes for 4 hours. Arrows highlight the nucleolar localization.

645 (E) Enrichment of Mob1 (A41211,  $n = 62$  cells), Mob1 $\Delta$ 78 (A41212,  $n = 60$  cells) and  
646 Mob1 $\Delta$ 132 (A41213,  $n = 48$  cells) at the dSPB (left) and in the nucleolus (right) as a function of  
647 cell cycle progression. Cells were grown at 25°C in SC medium + 2% glucose and imaged every  
648 3 minutes for 4 hours. Single cell traces were aligned based on anaphase onset, as defined as  
649 spindle length  $> 3 \mu\text{m}$  (measured based on SPB marker Spc42-mCherry), and averaged. Solid  
650 lines represent the average, shaded areas represent 95% confidence intervals.

651 (F) Maximum enrichment of full-length Mob1 (WT) and truncated Mob1 (Mob1 $\Delta$ 78 and  
652 Mob1 $\Delta$ 132) in the nucleolus in anaphase of cells in (E). Solid lines represent the median. \*\*\*\* $P$   
653  $< 0.0001$  by two-sided Wilcoxon rank sum test.

654

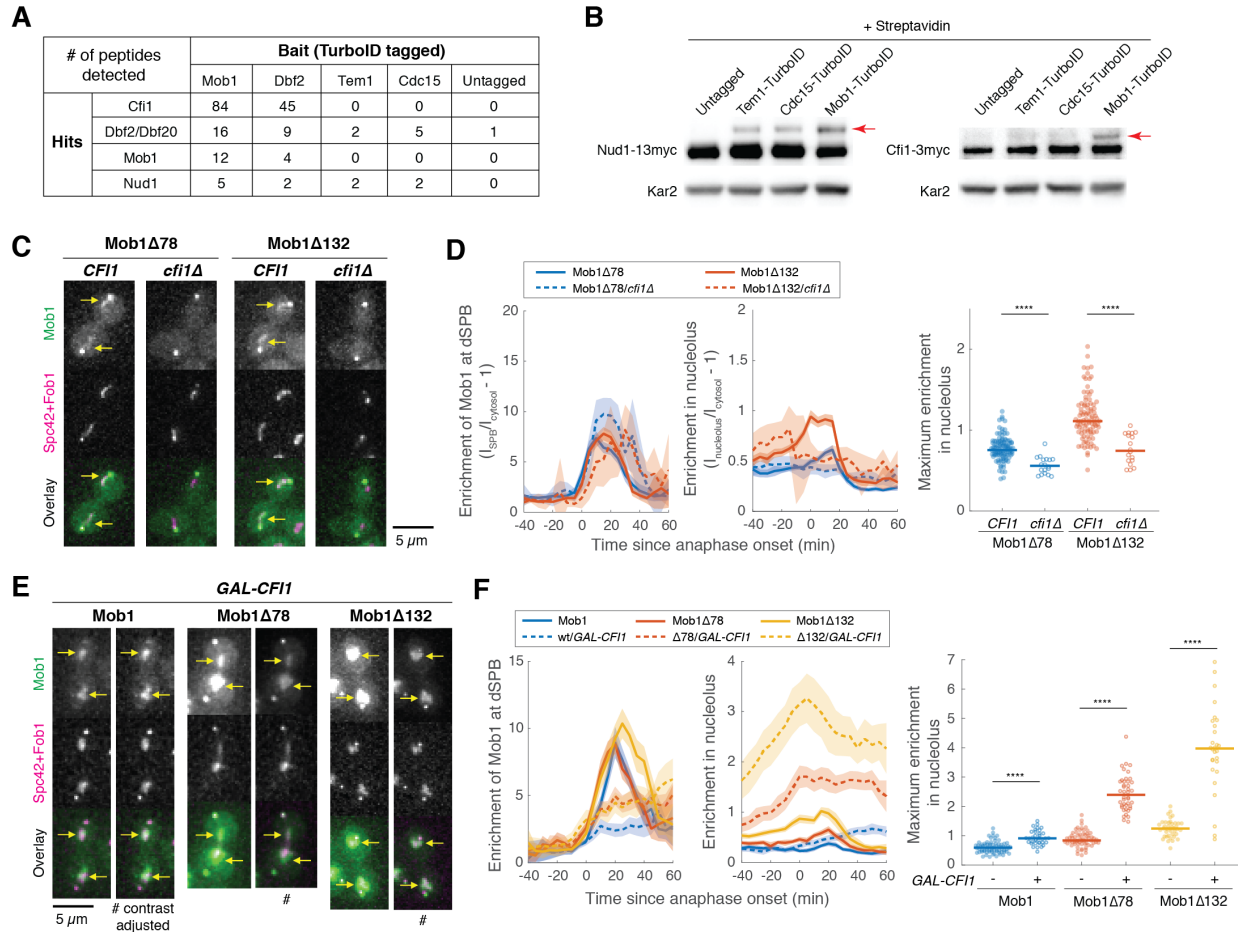

655

656 **Figure 2. Dbf2-Mob1 localizes to the nucleolus through interacting with Cfi1/Net1.**

657 (A) Results of proximity-based biotinylation with TurboID for MEN proteins (A41367, A41370,  
658 A41368, A41369 and A2588). Cells were grown at room temperature in YEP + 2% glucose + 50  
659 μM biotin.

660 (B) Streptavidin gel-shift assays to probe the interactions of TurboID-labeled MEN proteins with  
661 the MEN scaffold Nud1 (left, A11869, A41381, A41382 and A41380) or Cfi1/Net1 (right,  
662 A1638, A41406, A41407 and A41372). Cells were grown at room temperature in YEP + 2%  
663 glucose and lysates were treated with streptavidin and immunoblotted as indicated. Red arrows  
664 highlight biotinylated proteins.

665 (C and D) Representative images (C) and quantification (D) of Mob1Δ78 localization in wild-  
666 type *CFII/NET1* (A41344,  $n = 106$  cells) or *cfi1/net1Δ* (A41347,  $n = 18$  cells) cells and  
667 Mob1Δ132 localization in *CFII/NET1* (A41345,  $n = 95$  cells) or *cfi1/net1Δ* (A41348,  $n = 18$

668 cells) cells. Cells were grown at 25°C in SC medium + 2% glucose and imaged every 5 minutes  
669 for 4 hours. Arrows highlight nucleolar localization.  
670 (E and F) Representative images (E) and quantification (F) of Mob1 localization in wild-type  
671 (A41343,  $n = 110$  cells) or *GAL-CFII/NET1* expressing cells (A41340,  $n = 71$  cells), Mob1 $\Delta$ 78  
672 localization in wild-type (A41344,  $n = 103$  cells) or *GAL-CFII/NET1* expressing cells (A41341,  
673  $n = 68$  cells), and Mob1 $\Delta$ 132 localization in wild-type (A41345,  $n = 71$  cells) or cells expressing  
674 *GAL-CFII/NET1* (A41342,  $n = 53$  cells). # denotes that the image was linearly contrast adjusted  
675 to avoid over-saturation for Mob1 $\Delta$ 78 and Mob1 $\Delta$ 132. Cells were first grown at room  
676 temperature in SC medium + 2% raffinose. Cells were then mounted onto agarose pads made  
677 with SC medium + 1% raffinose + 1% galactose and imaged every 5 minutes for 5 hours at  
678 25°C. Arrows highlight nucleolar localization. Solid lines represent the average of single cell  
679 traces aligned to anaphase onset while shaded areas represent 95% confidence intervals. For  
680 maximum enrichment, each dot represents a single cell. The solid lines represent the median.  
681 \*\*\*\* $P < 0.0001$  by two-sided Wilcoxon rank sum test.



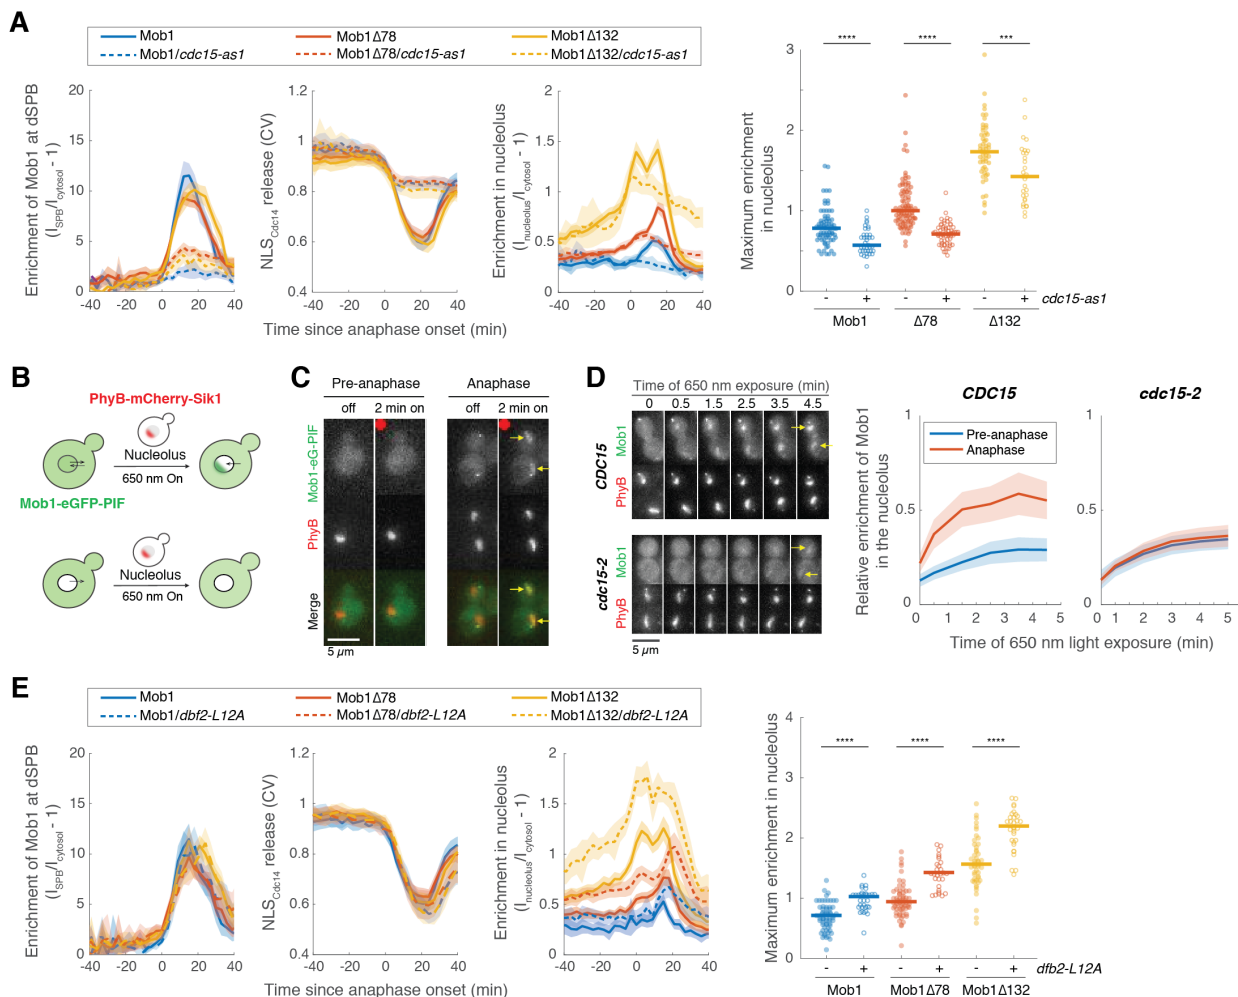

682

683 **Figure 3. CDC15 regulates nuclear access of Dbf2-Mob1.**

684 (A) Enrichment of Mob1 at the dSPB, in the nucleolus, and Dbf2-Mob1's kinase activity were  
 685 determined in cells going through anaphase in *CDC15* (A41211, A41212, and A41213;  $n = 74$ ,  
 686 94, and 55 cells respectively) or *cdc15-as1* (A41214, A41215, and A41216;  $n = 37$ , 63, and 30  
 687 cells respectively) cells. Cells were grown at 25°C in SC medium + 2% glucose and 10  $\mu$ M 1-  
 688 NA-PP1 and imaged every 3 minutes for 4 hours.

689 (B) Probing Dbf2-Mob1's nuclear access by recruiting Mob1 to the nucleolus with the PhyB-PIF  
 690 optogenetics system. By anchoring PhyB to the nucleolus, diffuse nuclear Dbf2-Mob1, if  
 691 present, can be visualized by recruiting Mob1-eGFP-PIF to the nucleolus.

692 (C) Recruiting Mob1 to the nucleolus at different cell cycle stages. A40260 cells were grown at  
 693 25°C in SC medium + 2% glucose, imaged after a 2-hour incubation with 12.5  $\mu$ M PCB in the



694 dark. Red dot denotes the frame where 650 nm light was applied to activate PhyB. Yellow  
695 arrows highlight the light-induced recruitment.

696 **(D)** Recruitment of Mob1 to the nucleolus in *CDC15* (A41360) or *cdc15-2* (A41361) cells.

697 Quantifications of Mob1's enrichment in the nucleolus as a function of PhyB activation time in  
698 *CDC15* (A41360,  $n = 27$  and 16 cells for pre-anaphase and anaphase respectively) or *cdc15-2*  
699 (A41361,  $n = 14$  and 36 cells for pre-anaphase and anaphase respectively) cells. Cells were  
700 grown at room temperature in SC medium + 2% glucose, incubated with 12.5  $\mu$ M PCB for 2  
701 hours in the dark, and shifted to 34 °C for 50 minutes before imaging.

702 **(E)** Nucleolar enrichment of wild-type and truncated Mob1 in wild-type and *dbf2-L12A* cells  
703 (A41394, A41395 and A41396;  $n = 32, 28$  and 31 cells respectively). Wild-type traces for  
704 comparison were the same as in Fig. 1E. Cells were grown similarly as in Fig. 1E.

705 For graphs in (A) and (E), solid lines represent the average of single cell traces aligned to  
706 anaphase onset. Shaded areas represent 95% confidence intervals. For maximum enrichment,  
707 each dot represents a single cell. Solid lines represent the median. \*\*\*\* $P < 0.0001$ ; \*\*\* $P < 0.001$   
708 by two-sided Wilcoxon rank sum test.

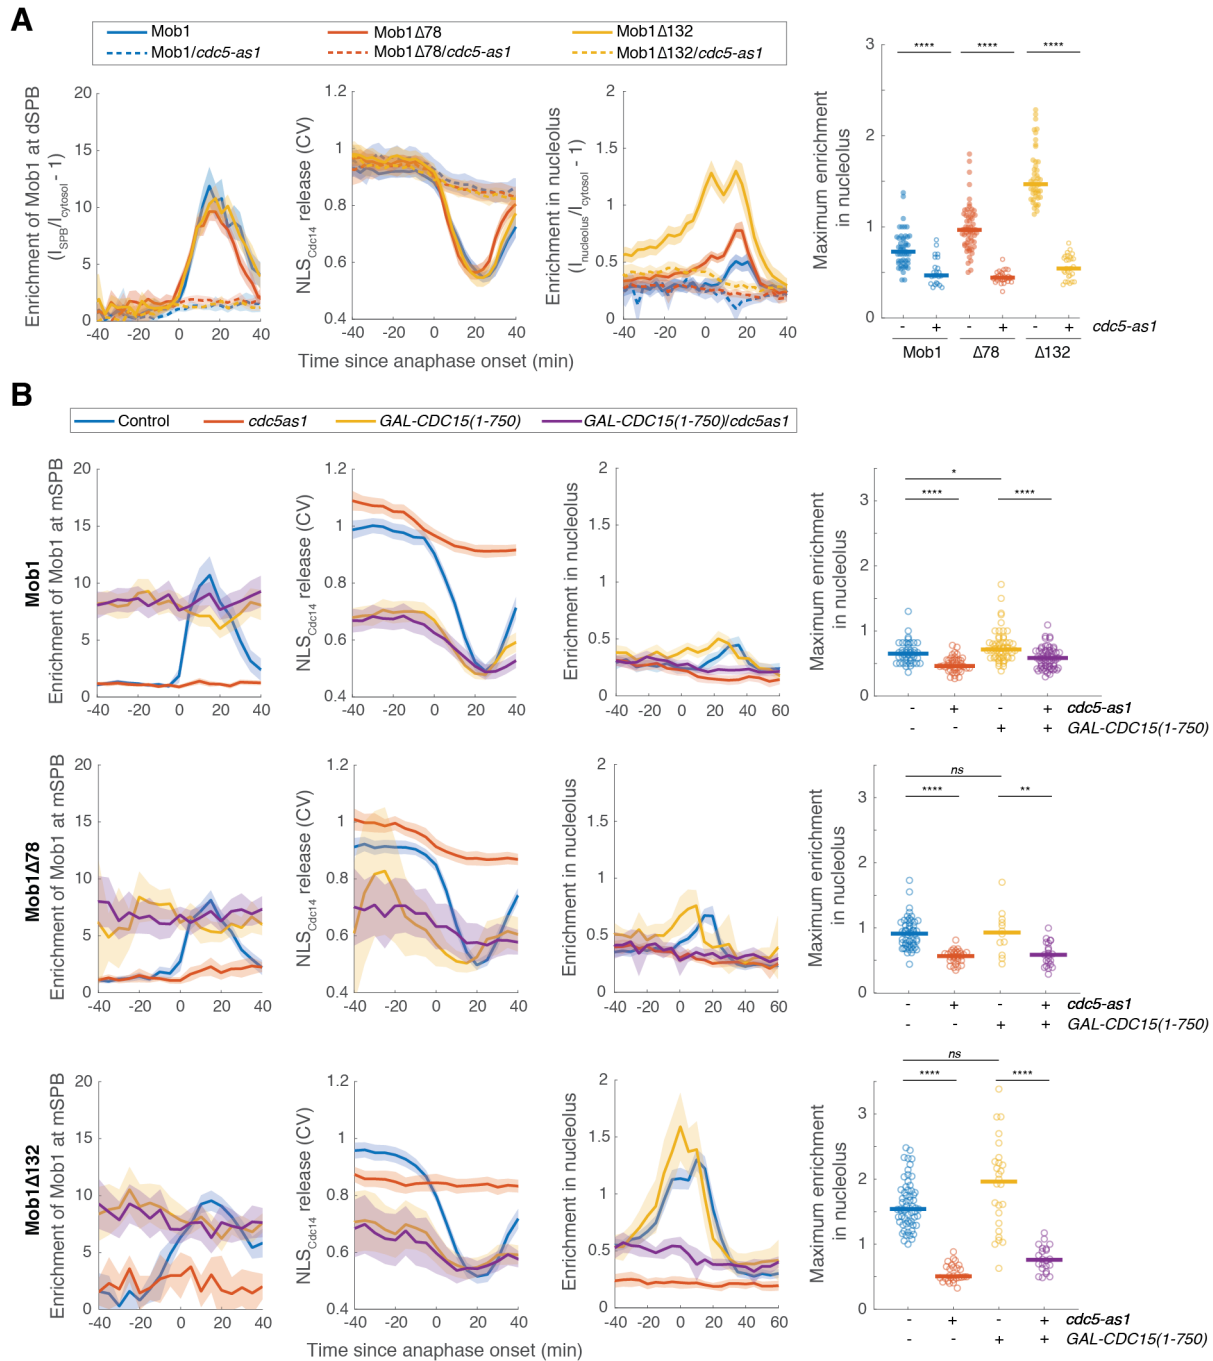

715 respectively). Cells were grown at 25°C in SC medium + 2% glucose and 5 μM CMK and  
716 imaged every 3 minutes for 4 hours.

717 **(B)** Cells harboring *GAL-CDC15(1-750)* and *cdc5-as1* either containing *eGFP-MOB1* (A41211,  
718 A41334, A41376 and A41337;  $n = 44, 41, 58$  and  $61$  cells respectively), or *eGFP-MOB1Δ78*  
719 (A41212, A41335, A41377, and A41338;  $n = 54, 30, 12$  and  $22$  cells respectively), or *eGFP-*  
720 *MOB1Δ132* (A41213, A41336, A41378 and A41339;  $n = 62, 28, 26$  and  $22$  cells respectively)  
721 were analyzed to determine Mob1 localization. Localization to the mSPB instead of dSPB was  
722 quantified here because cells expressing *GAL-CDC15(1-750)* often exit from mitosis in the  
723 mother (without movement of a SPB into the bud). For cells exited with two SPBs in the mother  
724 cell, maximum intensities of the two SPBs were used. Cells were grown at 25°C in SC medium +  
725 1% raffinose, 1% galactose and 5 μM CMK and imaged every 5 minutes for 5 hours. Solid lines  
726 represent the average of single cell traces aligned to anaphase onset. Shaded areas represent 95%  
727 confidence intervals. For maximum enrichment, each dot represents a single cell. Solid lines  
728 represent the median. \*\*\*\* $P < 0.0001$ ; \*\* $P < 0.01$ ; \* $P < 0.05$  by two-sided Wilcoxon rank sum  
729 test.

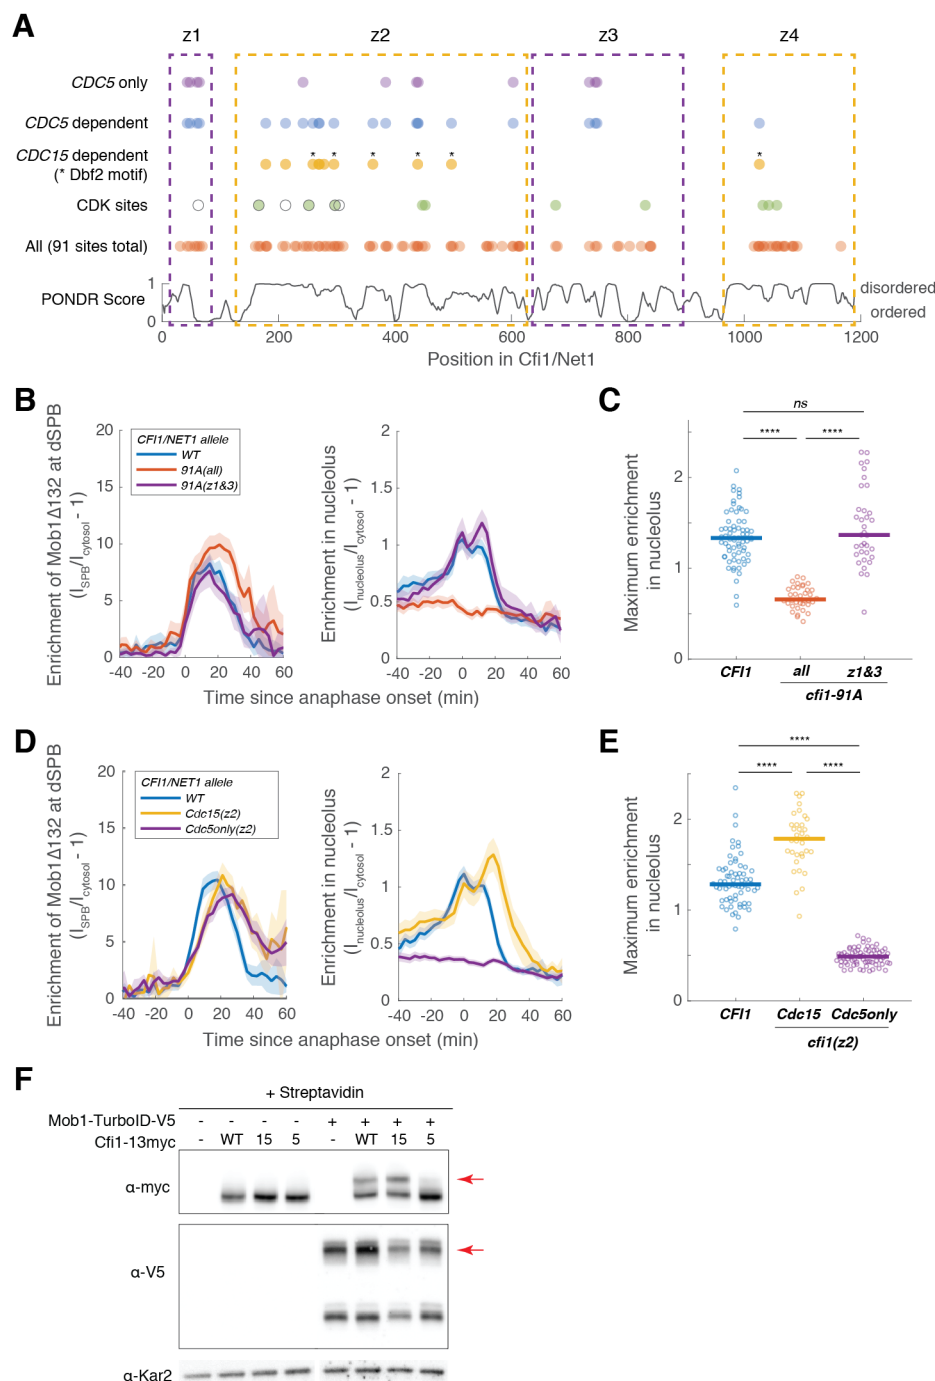

730

731 **Figure 5. Cdc5 promotes Dbf2-Mob1's nucleolar localization by phosphorylating**

732 **Cfi1/Net1.**

733 (A) Distribution of all, CDK sites, *CDC15*- and *CDC5*-dependent phosphorylation sites (Table

734 S4) and disordered regions in Cfi1/Net1. For CDK sites, open circles represent sites identified

735 and mutated in Azzam et al. 2004 (*cf1/net1-6Cdk*) and filled circles represent sites identified in

736 Holt et al. 2009. Dashed boxes denote the four zones.

737 **(B-E)** Localization of Mob1 $\Delta$ 132 in *CFII/NETI* (A41411,  $n = 67$  cells for B-C and 66 cells for  
738 D-E), *cfi1-91A* mutants (A41412 and A41413,  $n = 36$  and 35 cells), *cfi1-Cdc15(z2)* (A41593,  $n =$   
739 34 cells) or *cfi1-Cdc5only(z2)* (A41594,  $n = 69$  cells). Cells were grown at 25°C in SC medium +  
740 2% glucose and imaged every 3 minutes for 4 hours. Solid lines represent the average of single  
741 cell traces aligned to anaphase onset. Shaded areas represent 95% confidence intervals. For  
742 maximum enrichment, each dot represents a single cell. Solid lines represent the median. \*\*\*\* $P$   
743  $< 0.0001$  by two-sided Wilcoxon rank sum test.

744 **(F)** Streptavidin gel-shift assays to probe the interactions between TurboID-tagged Mob1 and  
745 different *CFII/NETI* alleles (from left to right: A2587, A41596, A41597, A41598, A41379,  
746 A41611, A41612, A41613). Cells were grown at room temperature in YEP + 2% glucose and  
747 lysates were treated with streptavidin and immunoblotted as indicated. Red arrows highlight  
748 biotinylated proteins.

749

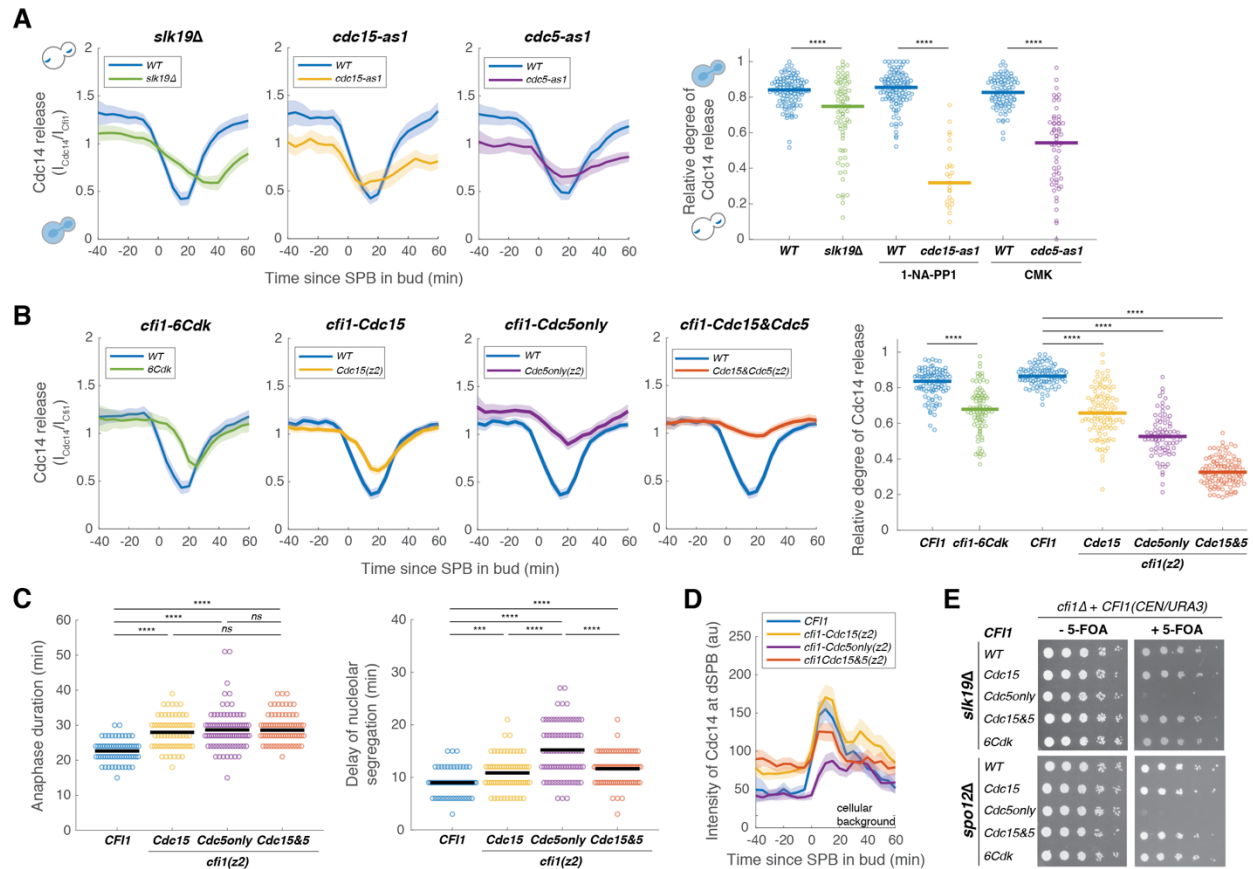

750

751 **Figure 6. MEN and Cdc5 promote release of Cdc14 from the nucleolus by phosphorylating**  
 752 **Cfi1/Net1.**

753 (A) Cdc14 nucleolar release kinetics in wild-type (A41387,  $n = 134$ , 123 and 96 cells for each  
 754 condition), *slk19Δ* (A41410,  $n = 86$  cells), *cdc15-as1* (A41408,  $n = 38$  cells) or *cdc5-as1*  
 755 (A41409,  $n = 61$  cells). Cells were grown at 25°C in SC medium + 2% glucose with  
 756 corresponding inhibitors and imaged every 5 minutes for 5 hours. Release of Cdc14 from the  
 757 nucleolus was quantified as the ratio of fluorescence intensity of Cdc14-eGFP to Cfi1/Net1-  
 758 mScarlet in the nucleolus ( $I_{Cdc14}/I_{Cfi1}$ ). Relative degree of Cdc14 release from the nucleolus  
 759 was calculated as the normalized minimal Cdc14 level in the nucleolus:  $(I_{Cdc14}(t_{min})/I_{Cfi1}(t_{min}))/$   
 760  $(I_{Cdc14}(t_{-20})/I_{Cfi1}(t_{-20}))$  where  $t_{min}$  represents the frame with minimal Cdc14 level in the nucleolus  
 761 and  $t_{-20}$  represent 20 min before movement of the SPB into bud.

762 (B) Cdc14 nucleolar release kinetics in cells harboring wild-type *CFI1/NET1* (A41387,  $n = 102$   
 763 and 114 cells) or *CFI1/NET1* phospho-mutants for CDK sites (A41420,  $n = 95$  cells), Cdc15  
 764 sites (A41587,  $n = 104$  cells), Cdc5 sites (A441588,  $n = 86$  cells), and Cdc15&Cdc5 sites

765 (A41589,  $n = 131$  cells). Cells were grown at 25°C in SC medium + 2% glucose and imaged  
766 every 5 minutes for 5 hours.

767 (C) Distribution of anaphase duration and relative delay of nucleolar segregation for different  
768 *CFII/NET1* phospho-mutants (A41436, A41590, A41591 and A41592;  $n = 76, 85, 99, 92$  cells  
769 respectively) measured using the SPB marker Spc42-eGFP and the nucleolar marker Cfi1/Net1-  
770 mScarlet- I (see Figure S14 for details). Cells were grown at 25°C in SC medium + 2% glucose  
771 and imaged every 3 minutes for 4 hours.

772 (D) Intensities of Cdc14-eGFP at dSPBs in different *CFII/NET1* phospho-mutant cells (A41387,  
773 A41587, A441588 and A41589;  $n = 80, 82, 77$  and 89 cells respectively). Cells were grown and  
774 imaged as in (B).

775 (E) Genetic interactions between different *CFII/NET1* phospho-mutants and *slk19Δ* (A41645,  
776 A41646, A41647, A41648, A41649) or *spo12Δ* (A41650, A41651, A41652, A41653, A41654)  
777 analyzed by plasmid shuffling (see Methods for details). 5-fold serial dilutions were spotted onto  
778 plates with or without 5'-fluoroorotic acid (5-FOA) and incubated at 25°C for 2 to 3 days. The  
779 presence of 5-FOA selects cells that are viable after losing the *CFII(URA3/CEN)* plasmid.

780 For all graphs, single cell traces were aligned to the frame where the dSPB entered the bud and  
781 averaged. Solid lines represent the average. Shaded areas represent 95% confidence intervals.

782 For distributions, each dot represents a single cell. Solid lines represent the median for (A-B) and  
783 the mean for (C). \*\*\*\* $P < 0.0001$ ; \*\*\* $P < 0.001$ ; \*\* $P < 0.01$ ; \* $P < 0.05$  by two-sided Wilcoxon  
784 rank sum test.

785

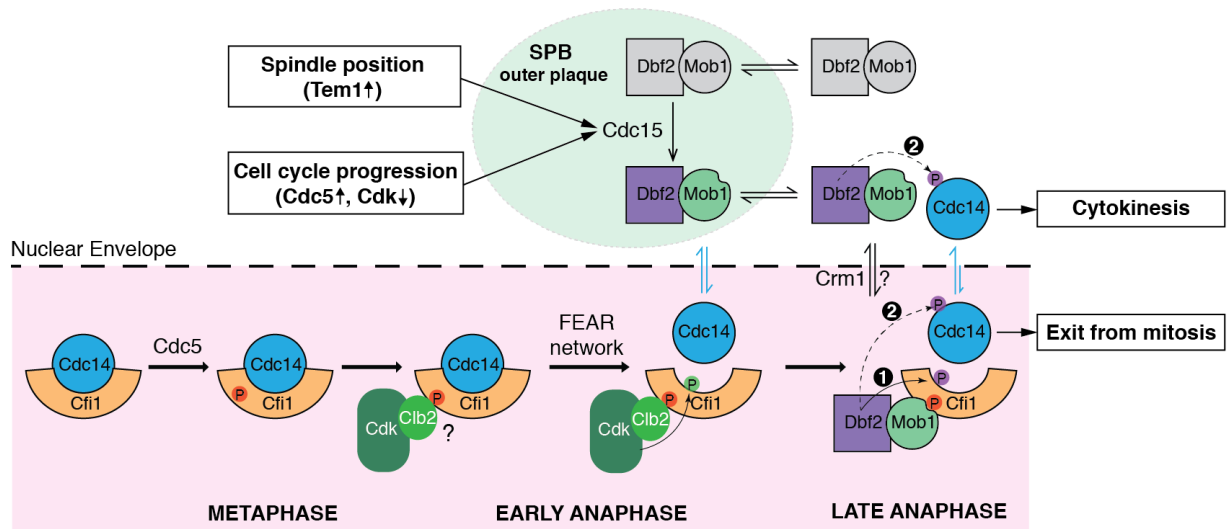

786

787 **Figure 7. Phosphorylation of Cfi1/Net1 by Cdc5 and Dbf2-Mob1 promotes mitotic exit.**

788 A model for Cdc14 activation. In metaphase, Cdc5 phosphorylates Cfi1/Net1 in the nucleolus to  
 789 prepare for Cdc14 release/activation in anaphase. Upon anaphase onset, the FEAR network  
 790 promotes phosphorylation of Cfi1/Net1 by Clb2-Cdk1 which results in transient release of Cdc14  
 791 from the nucleolus. In the meantime, the MEN kinase Cdc15 is activated integrating inputs from  
 792 both spindle position (via Tem1) and cell cycle progression (via Cdc5 and CDK activities).  
 793 Activated (SPB-localized) Cdc15 phosphorylates the SPB outer plaque protein Nud1 which  
 794 creates a dynamic docking site for the MEN terminal kinase complex Dbf2-Mob1 and facilitates  
 795 phosphorylation and activation of Dbf2-Mob1 by Cdc15. Activated Dbf2-Mob1 gains access to  
 796 the nucleus and is targeted to the nucleolus by interacting with Cdc5-primed Cfi1/Net1.  
 797 Nucleolar Dbf2-Mob1 then phosphorylates Cfi1/Net1, keeping Cdc14 dissociated from its  
 798 nucleolar inhibitor to trigger exit from mitosis. In addition, active Dbf2-Mob1 in the nucleolus  
 799 and/or cytoplasm phosphorylates Cdc14 at its NLS resulting in cytoplasmic retention of Cdc14  
 800 to facilitate cytokinesis.

801



## 802 MATERIALS AND METHODS

### 803 *Construction of Yeast strains and plasmids*

804 All *Saccharomyces cerevisiae* yeast strains used in this study are derivatives of W303 (A2587)  
805 and are listed in Table S1. All plasmids used in this study are listed in Table S2. Yeast were  
806 cultured in standard YEP media (1% yeast extract, 2% peptone) with 2% D-glucose, or in  
807 standard Synthetic Complete media (SC) with either 2% D-glucose or 2% raffinose prior to  
808 induction of *GALI/10* promoters with 1% raffinose + 1% galactose as indicated in the figure  
809 legends. Cells were cultured at 25°C unless noted otherwise.

810 C-terminal fusions were constructed using standard PCR-based methods. N-terminal  
811 truncation of *MOB1* mutants were made by first constructing the truncations with N-terminal  
812 eGFP fusion in plasmids (pA2828-2830) based on pRS305H-*MOB1* (König et al., 2010). PCR  
813 products of the fusion with 500bp upstream promoter region and 300bp downstream of the  
814 *MOB1* ORF as well as the hphMX6 marker were transformed and integrated at the *MOB1* locus.  
815 Correct integration and mutations were confirmed by PCR and sequencing. The NLS<sub>Cdc14</sub>  
816 reporter was made by Gibson assembly. NLS<sub>Cdc14</sub> (Cdc14aa450-551) from pA2725 (Mohl et al.,  
817 2009) and synthesized yeast codon optimized miRFP670 (Shcherbakova and Verkhusha, 2013)  
818 (denoted as ymiRFP670) were assembled into the p404TEF1 vector (pA2726) which yielded  
819 pA2786 for integration at the *trp1* locus. The PhyB constructs were integrated at the *leu2* locus  
820 as single integrants (Yang et al., 2013). The eGFP-PIF C-terminal tagging plasmid (pA2821) was  
821 made by replacing the mCitrine in pA2721 with eGFP and correcting the frame shift mutation  
822 (missing a G at codon#2) in the *natMx6* coding sequence in the original plasmid acquired from  
823 Addgene. The TurboID tagging plasmid (pA2859) was constructed by inserting the TurboID-V5  
824 sequence from pA2847 (Branon et al., 2018) into the vector backbone of pA2821 between the  
825 linker and natMx6.

826 Point mutations and truncations in the *GAL-DBF2* plasmids were made using Q5 site-  
827 directed mutagenesis (NEB). Single point mutation in *DBF2* (*dbf2-L12A*) was introduced at the  
828 endogenous locus using Cas9-mediated gene editing based on previously published protocols  
829 (Anand et al., 2017) with modifications. Briefly, BpII cut plasmid pA2911 containing Cas9 and  
830 gRNA missing the 20 bp target specific complementary sequence was transformed into A2587  
831 together with (1) a ~250 bp synthesized double stranded DNA (IDT) containing the 20 bp  
832 complementary sequence for *DBF2* (TGCTCATATTGCCTGCCAAG) sandwiched with

833 homologous sequences to the gRNA sequence in plasmid pA2911 for gap repair, and (2) an  
834 80mer single strand DNA harboring *dbf2-L12A* mutation as the repair template. Successfully  
835 edited clones were checked by sequencing and cured of the Cas9 plasmid. Phospho-mutants of  
836 *DBF2* (*dbf2-S17,20A* and *dbf2-S17,20D*) were first constructed in plasmids (pA2948, pA2953  
837 and pA2954) by Q5 site-directed mutagenesis. The *DBF2* ORF as well as the *URA3* marker were  
838 then PCR amplified and transformed into A32629 to integrate at the *DBF2* locus as the sole copy  
839 of *DBF2*. Correct integration and mutations were confirmed by PCR and sequencing.

840 To generate *CFII/NET1* phospho-mutants, a fusion of wild-type *CFII/NET1* and  
841 mScarlet-I with ~300 bp upstream and downstream regions of *CFII/NET1* were first Gibson  
842 assembled into a single-integration vector backbone to generate plasmid pA2898. *CFII/NET1*  
843 phospho-mutants were synthesized (Twist Bioscience) in two segments (aa25-624 and aa617-  
844 1173) and Gibson assembled into the vector backbone of pA2898 to replace wild-type  
845 *CFII/NET1*. These *CFII/NET1* constructs were integrated into strain A41362 harboring a  
846 heterozygous deletion of *CFII/NET1* and haploid strains with *cfi1Δ* and different phospho-mutant  
847 forms of *CFII/NET1* integrated as a single copy at the *leu2* locus as the sole source of  
848 *CFII/NET1* were obtained through tetrad dissection.

849 Phospho-mutants in the NLS<sub>Cdc14</sub> reporter were made by first introducing the point  
850 mutations into the integration plasmid (pA2735) with Q5 site-directed mutagenesis and then  
851 transformed and integrated at the *ura3* locus. The triple mutants of *CDC14* (S531,537,546A) was  
852 introduced at the endogenous locus of *CDC14-eGFP* (A34515) using Cas9-mediated gene  
853 editing as described above. The 20 bp complementary sequence for the gRNA used to target  
854 *CDC14* was GGAGAGTAACGTCAGGGAGA.

855

### 856 ***FRAP analysis***

857 FRAP analysis was performed on a DeltaVision-OMX Super-Resolution Microscope (Applied  
858 Precision, GE Healthcare Bio-Sciences) using a 60x oil objective and a 488 nm laser adjusted to  
859 bleach an area of approximately 0.5 μm in radius. Two prebleach images were acquired followed  
860 by a laser pulse (100% intensity) of 0.02 s duration and postbleach images were acquired at 1  
861 s/frame for 30 s. Images at each time points were maximum projections of 7 z stacks with 0.5 μm  
862 spacing. Images were analyzed with a custom MATLAB script. After subtracting the  
863 background, fluorescence intensities in the cytosol,  $I_{cytosol}(t)$ , and at the SPB,  $I_{SPB}(t)$  were

864 measured after segmenting the cell and SPBs. Photobleaching was corrected by normalizing  $I_{SPB}$   
865 ( $t$ ) with  $I_{cytosol}(t)$ ,  $I_{SPB\_norm}(t) = I_{SPB}(t) / I_{cytosol}(t)$ . Double normalization for FRAP was calculated  
866 to scale the photobleaching effect between 0 and 1:  $I_{SPB\_FRAP}(t) = [I_{SPB\_norm}(t) - I_{SPB\_norm}(0)] /$   
867  $[I_{SPB\_norm}(pre) - I_{SPB\_norm}(0)]$ , where  $t = 0$  is the time point (frame) right after photobleaching and  
868  $t = pre$  is the time point (frame) right before photobleaching. The double normalized FRAP  
869 curves were then fitted to a single exponential curve:  $y = y_{max} \left( 1 - e^{\left( -\ln 2 / t_{1/2} \right) t} \right)$ , where  $y_{max}$   
870 is the fraction recovered while  $t_{1/2}$  is the half-recovery time.

871

### 872 ***Microscopy and image analysis***

873 For live-cell microscopy, cells were imaged on agarose pads (2% agarose in SC medium + 2%  
874 glucose, unless otherwise noted) affixed to a glass slide and covered with a coverslip. Imaging  
875 was performed on a DeltaVision Elite platform (GE Healthcare Bio-Sciences) with an InsightSSI  
876 solid state light source, an UltimateFocus hardware autofocus system and a model IX-71,  
877 Olympus microscope controlled by SoftWoRx software. A 60x Plan APO 1.42NA objective and  
878 CoolSNAP HQ2 camera were used for image acquisition. For each time point, 7 z sections with  
879 1  $\mu$ m spacing were collect for each channel and were deconvolved. Maximum projections of the  
880 deconvolved z stack were used for fluorescence quantification.

881 Image analysis was performed with custom scripts in MATLAB. First, yeast cells were  
882 segmented and tracked through time using the bright-field image stacks and a previously  
883 reported algorism (Riccova et al., 2013). A few modifications were made for the tracking  
884 process. Images were first aligned to correct for drift in the xy plane and cell segmentations in the  
885 last frame of the time-lapse series were used as the reference for tracking. Next, fluorescence  
886 images of cell cycle markers (such as Spc42 and or Cfi1/Net1) were segmented and tracked  
887 based on cell segmentation. Appearance of a cell cycle marker in a cell during the acquisition  
888 period was used to identify buds (daughter cells) and cell division events. Tracking of the cell  
889 cycle markers that migrated into the buds were used to identify the corresponding mother cells.  
890 Finally, for each division event identified, localization of Mob1 (or Cdc14) at regions defined by  
891 the cell cycle markers was quantified.

892 For Mob1 localization at the SPBs ( $I_{SPB}$ ), maximum intensity of Mob1 at SPBs (dilated  
893 from the SPB area based on segmentation of Spc42) was used given that the size of SPBs (~100

894 nm) is within the diffraction limit of light microscopy. For Mob1 localization in the nucleolus  
895 ( $I_{nucleolus}$ ), the median intensity of Mob1 in the nucleolus as segmented by Cfi1/Net1 was used.  
896 To calculate the relative enrichment of Mob1 at the SPB or in the nucleolus, Mob1 intensities at  
897 these sites as defined above were normalized to the median intensity of Mob1 in the cytosol  
898 which was defined as the cell area with cell cycle marker area subtracted ( $I_{cytosol}$ ):  
899  $I_{SPB \text{ or } nucleolus} / I_{cytosol} - 1$ . For the Dbf2-Mob1 kinase activity reporter, NLS<sub>Cdc14</sub>, its  
900 translocation from the nucleus into the cytoplasm was quantified with the coefficient of variation  
901 (CV) of the pixel intensities within the dividing cell. CV is defined as the standard deviation  
902 divided by the mean.

903 To quantify Cdc14 release from the nucleolus, the ratio of Cdc14 intensity to Cfi1/Net1  
904 intensity ( $I_{Cdc14} / I_{Cfi1}$ ) was calculated for each pixel within the nucleolus as segmented using  
905 Cfi1/Net1 and averaged.

906 Single cell traces were aligned based on the timing of anaphase onset or the movement of  
907 a SPB into the bud as indicated in figures, and averaged. 95% confidence intervals were  
908 calculated as  $\mu \pm 1.96 * \sigma / \sqrt{n}$ , where  $\mu$  and  $\sigma$  denote the mean and standard deviation  
909 respectively and  $n$  is the number of cells measured.

910

### 911 ***Immunoblot analysis***

912 Log-phase cultures of cells grown in YEP + 2% glucose were harvested and treated with  
913 5% TCA at 4°C overnight. TCA treated cell pellets were washed with acetone, air dried, and  
914 resuspended in lysis buffer (10 mM Tris, 1 mM EDTA, 2.75 mM DTT, pH = 8). Cells were  
915 lysed by bead-beating using a Multivortexer (max speed, 20 minutes) and glass beads at 4°C and  
916 followed by boiling in SDS PAGE protein loading buffer for 5 minutes. Lysates were clarified  
917 by centrifugation and were resolved on a 15-well NuPAGE 4-12% Bis-Tris protein gel (Thermo  
918 Fisher Scientific) prior to transfer onto nitrocellulose membranes. GFP-Mob1 and variants were  
919 detected using an anti-GFP antibody (Clontech, JL-8) at a 1:1000 dilution. Nud1-13myc and  
920 Cfi1/Net1-3myc were detected using an anti-Myc antibody (abcam, 9E10) at a 1:500 dilution.  
921 Mob1-V5-TurboID was detected using an anti-V5 antibody (Invitrogen) at a 1:2000 dilution.  
922 Kar2 was detected using a rabbit anti-Kar2 antiserum at a 1:200,000 dilution. Secondary  
923 antibodies were used at a 1 :10,000 dilution. Blots were imaged using the ECL Plus system (GE  
924 Healthcare).

925

926 ***TurboID-MS and streptavidin gel-shift assay***

927 To identify biotinylated proteins as a result of interaction or physical proximity with TurboID  
928 tagged bait protein by mass spectrometry (MS), log-phase cells with TurboID tagged bait and  
929 untagged control cells were grown in YEP + 2% glucose + 50  $\mu$ M biotin at room temperature for  
930 3.5 h (~ two doublings). ~40 OD of cells were harvested for each sample and were treated with  
931 5% trichloroacetic acid (TCA) at 4°C for a minimum of 10 minutes. TCA treated cells were  
932 pelleted, washed with 50 mM Tris (pH = 7.5) and acetone, and dried. Dried cell pellets were  
933 resuspended in lysis buffer (50 mM Tris, pH 7.5, 1 mM EDTA, 5 mM DTT, 1 mM PMSF, and  
934 complete mini protease inhibitor cocktail by Roche) and were lysed by bead-beating with chilled  
935 MiniBeadbeater (Biospec) and glass beads for 5 minutes followed by boiling in 1% SDS for 5  
936 minutes. Lysates were diluted with RIPA buffer (50 mM Tris, pH 7.5, 150 mM NaCl, 0.1% SDS,  
937 0.5% sodium deoxycholate, 1% NP40) and clarified by centrifugation. Protein concentration of  
938 the lysates was measured by Bradford assay. 350  $\mu$ l MyOne streptavidin C1 dynabeads (Thermo  
939 Fisher Scientific) were washed twice with RIPA buffer, incubated with clarified lysates  
940 containing ~ 3 mg of total protein for each sample with rotation for 1 hour at room temperature,  
941 then moved to 4°C and incubated overnight with rotation. On the second day, the supernatants  
942 (flow through) were removed and the beads were washed twice with 1 ml of 0.1 M Na<sub>2</sub>CO<sub>3</sub>,  
943 once with 1 ml of 2 M urea in 10 mM Tris (pH = 7.5), and twice with 1 ml RIPA buffer. Bound  
944 proteins were eluted by boiling the beads in 30  $\mu$ l 3x protein loading buffer supplemented with 2  
945 mM biotin. Small aliquots of samples were saved along the process to monitor for the  
946 enrichment for biotinylated proteins by immunoblotting for V5 (included in the TurboID tagged  
947 bait) and biotin.

948 Eluted proteins were resolved on a 10-well NuPAGE 4-12% Bis-Tris protein gel (Thermo  
949 Fisher Scientific), stained with Coomassie (Imperial Protein Stain, Thermo Fisher Scientific) and  
950 entire gel lanes were excised and cut into 1-mm pieces. Proteins were reduced with 20 mM  
951 dithiothreitol (Sigma) for 1 hour at 56°C and then alkylated with 60 mM iodoacetamide (Sigma)  
952 for 1 hour at 25°C in the dark. Proteins were then digested with 12.5 ng/ $\mu$ L modified trypsin  
953 (Promega) in 50  $\mu$ L 100 mM ammonium bicarbonate, pH 8.9 at 25°C overnight. Peptides were  
954 extracted by incubating the gel pieces with 5% formic acid in 50% acetonitrile then 100 mM  
955 ammonium bicarbonate, repeated twice followed by incubating the gel pieces with 100%

956 acetonitrile then 100 mM ammonium bicarbonate, repeated twice. Each fraction was collected,  
957 combined, and reduced to near dryness in a vacuum centrifuge. Peptides were desalted using  
958 C18 SpinTips (Protea, Morgantown, WV).

959 Peptides were separated by reverse phase HPLC (Thermo Easy nLC1000) using a  
960 precolumn (made in house, 6 cm of 10  $\mu$ m C18) and a self-pack 5  $\mu$ m tip analytical column (12  
961 cm of 5  $\mu$ m C18, New Objective) over a 140-minute gradient before nanoelectrospray using a  
962 QExactive HF-X mass spectrometer (Thermo). Raw mass spectral data files (.raw) were searched  
963 using Proteome Discoverer (Thermo) and Mascot version 2.4.1 (Matrix Science). Mascot search  
964 parameters were: 10 ppm mass tolerance for precursor ions; 15 mmu for fragment ion mass  
965 tolerance; 2 missed cleavages of trypsin; fixed modification was carbamidomethylation of  
966 cysteine; variable modifications were methionine oxidation and lysine biotinylation. Only  
967 peptides with a Mascot score greater than or equal to 25 and an isolation interference less than or  
968 equal to 30 were included in the data analysis.

969 There are several endogenous biotinylated proteins in yeast. To identify specific proteins  
970 enriched in the TurboID labeling experiments (hits), total peptides identified for each protein in  
971 cells with TurboID tagged bait were compared with the unlabeled control cells to calculate the  
972 ratio of enrichment. A threshold of 10 standard deviations above the average ratio of enrichment  
973 for all proteins in each sample was used to identify hits (see Figure S3B).

974 For the streptavidin gel-shift assays, cell lysates were prepared as for typical  
975 immunoblotting experiments. Prior to loading samples onto protein gels, 20  $\mu$ l of lysates for each  
976 sample was incubated with 2  $\mu$ l of 10 mg/ml streptavidin for 10 min at room temperature with  
977 rotation. Treated samples were then resolved by SDS-PAGE gel at 4°C and processed for  
978 immunoblotting as described above.

979

### 980 ***PhyB-PIF based optogenetics***

981 The PhyB-PIF based optogenetics experiments were performed based on previous reports (Jost  
982 and Weiner, 2015; Yang et al., 2013). Cells grown to log phase in 1x SC medium + 2% glucose  
983 were incubated with 31.25  $\mu$ M (0.5  $\mu$ l of 12.5 mM stock in 200  $\mu$ l culture) Phycocyanobilin  
984 (PCB, Santa Cruz Biotechnology) for 2 hours at room temperature in the dark. Cells were then  
985 pelleted and resuspended in fresh medium without PCB and were mounted onto an agarose pad  
986 with 2x SC medium + 2% glucose for imaging. To apply the light, we attached one 650 nm and



987 one 750 nm light-emitting diode (LED, Light-speed Technologies) onto the microscope  
988 condenser. Light was controlled manually during the experiments. For the continuous exposure  
989 of 650 nm light during time-course experiments, the light was briefly turned off for each image  
990 acquisition. To quantify the relative enrichment of target protein in the PhyB-anchored region,  
991 pixel intensities of the target protein (Mob1-eGFP-PIF,  $I_{PIF}$ ) and PhyB (PhyB-mCherry,  $I_{PhyB}$ )  
992 inside the cell were fitted to a line ( $I_{PIF} = \alpha + \beta I_{PhyB}$ ). The slope of the fitted line ( $\beta$ ) was used  
993 to assess the extent of co-localization or enrichment of the target protein in the PhyB-anchored  
994 region. This method is robust against both photobleaching of the target protein during the time-  
995 course and difference in the shape and size of the anchored region (the nucleolus) at different cell  
996 cycle stages.

997

### 998 **Phosphoproteomics**

999 To map phosphorylation events that depend on *CDC5* or *CDC15* (MEN) activity, we used the  
1000 analog-sensitive alleles of *CDC5* (*cdc5-as1*) or *CDC15* (*cdc15-as1*) and compared  
1001 phosphopeptides with and without inhibiting the kinase in anaphase (and metaphase for Cdc5)  
1002 enriched cultures. To enrich for anaphase cells, we first synchronized cells in G1 with  $\alpha$ -factor (5  
1003  $\mu$ g/ml for 2.5 hours).  $\alpha$ -factor arrested cultures were then washed and released into YEP + 2%  
1004 glucose + inhibitor (5  $\mu$ M CMK for *CDC5/cdc5-as1* or 10  $\mu$ M 1-NAPP1 for *CDC5/cdc5-as1*) at  
1005 room temperature to progress to anaphase (~ 100 minutes). Synchronization and cell cycle stage  
1006 were assessed by monitoring budding and spindle length at various time points. Spindles were  
1007 visualized by immunofluorescence using an anti-tubulin antibody (Abcam ab6161). Cultures  
1008 collected for the anaphase experiment harbored 74% (*WT* + 1-NA-PP1), 95% (*cdc15-as1*, 1-NA-  
1009 PP1), 69% (*WT* + CMK), and 94% (*cdc5-as1* + CMK) cells with anaphase spindles.

1010 Phosphopeptide preparation was based on previous methods (Holt et al., 2009; Villén and  
1011 Gygi, 2008). ~25 ODs of cells were harvested for each replicate (6 replicates per samples for the  
1012 anaphase experiment and 3 replicates per sample for the metaphase experiment) by  
1013 centrifugation (5 min at 3000 rpm). Cell pellets were washed with cold 50 mM Tris (pH = 7.5)  
1014 and resuspended in cold lysis buffer containing 8 M urea in 50 mM Tris (pH = 7.5), 75 mM  
1015 NaCl, 50 mM NaF, 50 mM  $\beta$ -glycerophosphate, 1 mM sodium orthovanadate, 10 mM sodium  
1016 pyrophosphate and protease inhibitor cocktail (complete mini, EDTA-free, Roche). Cells were  
1017 lysed under denaturing conditions by bead-beating with a chilled MiniBeadbeater (Biospec, two



1018 rounds of 3 cycles of 90 s each) and glass beads. The protein extract was then separated from the  
1019 beads and insoluble material by centrifugation. Protein concentration of the lysate was  
1020 determined by BCA protein assay (Pierce).

1021 The protein extraction was ultrasonically lysed at 4°C for 2 minutes with six rounds using  
1022 a VialTweeter device (Hielscher-Ultrasound Technology). The proteins extracted were then  
1023 processed with a precipitation-based digestion protocol using trypsin (Promega) at a ratio of 1:20  
1024 as described previously(Collins et al., 2017). About 500 µg of resultant peptides from each  
1025 sample were subjected for phosphopeptide enrichment, using the High-Select™ Fe-NTA kit  
1026 (Thermo Scientific, A32992) according to the kit instruction, as described previously(Gao et al.,  
1027 2019). About 1.5 µg of phosphopeptides enriched from each sample were used for DIA-MS  
1028 measurement on an Orbitrap Fusion Lumos Tribrid mass spectrometer (Thermo Scientific)  
1029 platform coupled to a nanoelectrospray ion source, as described previously (Mehnert et al.,  
1030 2019). DIA-MS data analyses were performed using Spectronaut v13 (Bruderer et al., 2017)  
1031 using default setting, by searching against a database of 6632 yeast open reading frames(Hebert  
1032 et al., 2014) and the Swiss-prot yeast proteome database. In particular, the PTM localization  
1033 option in Spectronaut v13 was enabled to locate phosphorylation sites (Bekker-Jensen et al.,  
1034 2020; Collins et al., 2017), with the probability score cutoff >0.75(7), resulting Class-I peptides  
1035 to be identified and quantified. Both peptide and protein FDR cutoff (Q value) were controlled at  
1036 1%, and the label-free protein quantification of proteome and phospho-proteome was performed  
1037 using the default settings in Spectronaut.

1038 To identify peptides whose phosphorylation depended on *CDC5* or *CDC15*, we  
1039 calculated the ratio as well as the *p*-value of peptide intensities in *WT* versus *asl* samples. The *p*-  
1040 values were calculated using a two-sided Student's *t*-test and were adjusted for false discovery  
1041 rate (FDR) of multiple hypothesis testing using the linear step-up procedure (Benjamini-  
1042 Hochberg procedure). A threshold of ratio  $R > 2$  and  $p_{adj} < 0.05$  was used to identify hits.  
1043 Additional hits were also included for peptides that were not detected in the *asl* samples but  
1044 were detected in at least 5 out of 7 replicates (or 4 out of 6 replicates in the metaphase  
1045 experiment) of the *WT* samples. Peptides that were only detected in one replicate of the *asl*  
1046 samples but were detected in at least 5 out of 7 replicates (or 4 out of 6 replicates in the  
1047 metaphase experiment) of the *WT* samples with a ratio  $> 2$  were also included. After we have  
1048 identified hits for peptides, we mapped the peptides and phosphorylation sites in those peptides

1049 to proteins in the yeast proteome. For phosphorylation sites that were detected in multiple  
1050 peptides, peptides with a single phosphorylation were given priority. We marked a site as a  
1051 strong hit only when all single phosphorylation peptides for the specific site fit our selection  
1052 criteria. If a site was only detected in multi-phosphorylation peptides that fit our selection  
1053 criteria, we designated that site as a weak hit.

1054

### 1055 ***Plasmid shuffling***

1056 To assess the genetic interactions between different *CFII/NET1* phospho-mutants and FEAR  
1057 mutants (*slk19Δ* or *spo12Δ*), we constructed strains in the background of *slk19Δ* or *spo12Δ* with  
1058 *cfi1/net1Δ* carrying a *URA3*-based *CEN* plasmid expressing wild-type *CFII/NET1* (pA2858) and  
1059 different *CFII/NET1* phospho-mutants integrated at the *leu2* locus (A41645-A41654). Growing  
1060 these strains on plates with 5'-fluoroorotic acid (5-FOA) selects cells that are viable after losing  
1061 the *URA3* plasmid.

1062

### 1063 ***Data and Code Availability***

1064 The mass spectrometry phosphoproteomics data have been deposited to the ProteomeXchange  
1065 Consortium via the PRIDE (Perez-Riverol et al., 2019) partner repository. Custom MATLAB  
1066 scripts are available at <https://github.com/snow-zhou/Dbf2-Mob1>.

## REFERENCES

- Anand, R., Memisoglu, G., and Haber, J. (2017). Cas9-mediated gene editing in *Saccharomyces cerevisiae*. *Protoc. Exch.*
- Azzam, R. (2004). Phosphorylation by Cyclin B-Cdk Underlies Release of Mitotic Exit Activator Cdc14 from the Nucleolus. *Science* *305*, 516–519.
- Bardin, A.J., Visintin, R., and Amon, A. (2000). A Mechanism for Coupling Exit from Mitosis to Partitioning of the Nucleus. *Cell* *102*, 21–31.
- Bardin, A.J., Boselli, M.G., and Amon, A. (2003). Mitotic Exit Regulation through Distinct Domains within the Protein Kinase Cdc15. *Mol. Cell. Biol.* *23*, 5018–5030.
- Bardwell, L. (2006). Mechanisms of MAPK signalling specificity. *Biochem. Soc. Trans.* *34*, 837–841.
- Bekker-Jensen, D.B., Bernhardt, O.M., Hogrebe, A., Martinez-Val, A., Verbeke, L., Gandhi, T., Kelstrup, C.D., Reiter, L., and Olsen, J.V. (2020). Rapid and site-specific deep phosphoproteome profiling by data-independent acquisition without the need for spectral libraries. *Nat. Commun.* *11*, 787.
- Bembenek, J., Kang, J., Kurischko, C., Li, B., Raab, J.R., Belanger, K.D., Luca, F.C., and Yu, H. (2005). Crml-Mediated Nuclear Export of Cdc14 is Required for the Completion of Cytokinesis in Budding Yeast. *Cell Cycle* *4*, 961–971.
- Bishop, A.C., Ubersax, J.A., Petsch, D.T., Matheos, D.P., Gray, N.S., Blethrow, J., Shimizu, E., Tsien, J.Z., Schultz, P.G., Rose, M.D., et al. (2000). A chemical switch for inhibitor-sensitive alleles of any protein kinase. *Nature* *407*, 395–401.
- Branon, T.C., Bosch, J.A., Sanchez, A.D., Udeshi, N.D., Svinkina, T., Carr, S.A., Feldman, J.L., Perrimon, N., and Ting, A.Y. (2018). Efficient proximity labeling in living cells and organisms with TurboID. *Nat. Biotechnol.* *36*, 880–887.
- Britschgi, A., Duss, S., Kim, S., Couto, J.P., Brinkhaus, H., Koren, S., De Silva, D., Mertz, K.D., Kaup, D., Varga, Z., et al. (2017). The Hippo kinases LATS1 and 2 control human breast cell fate via crosstalk with ER $\alpha$ . *Nature* *541*, 541–545.
- Bruderer, R., Bernhardt, O.M., Gandhi, T., Xuan, Y., Sondermann, J., Schmidt, M., Gomez-Varela, D., and Reiter, L. (2017). Optimization of Experimental Parameters in Data-Independent Mass Spectrometry Significantly Increases Depth and Reproducibility of Results. *Mol. Cell. Proteomics MCP* *16*, 2296–2309.
- Campbell, I.W., Zhou, X., and Amon, A. (2019). The Mitotic Exit Network integrates temporal and spatial signals by distributing regulation across multiple components. *ELife* *8*.
- Cargnello, M., and Roux, P.P. (2011). Activation and Function of the MAPKs and Their Substrates, the MAPK-Activated Protein Kinases. *Microbiol. Mol. Biol. Rev.* *75*, 50–83.

Carpenter, K., Bell, R.B., Yunus, J., Amon, A., and Berchowitz, L.E. (2018). Phosphorylation-Mediated Clearance of Amyloid-like Assemblies in Meiosis. *Dev. Cell* 45, 392-405.e6.

Cheng, L., Hunke, L., and Hardy, C.F.J. (1998). Cell Cycle Regulation of the *Saccharomyces cerevisiae* Polo-Like Kinase Cdc5p. *Mol. Cell. Biol.* 18, 7360–7370.

Collins, B.C., Hunter, C.L., Liu, Y., Schilling, B., Rosenberger, G., Bader, S.L., Chan, D.W., Gibson, B.W., Gingras, A.-C., Held, J.M., et al. (2017). Multi-laboratory assessment of reproducibility, qualitative and quantitative performance of SWATH-mass spectrometry. *Nat. Commun.* 8, 291.

D'Amours, D., Stegmeier, F., and Amon, A. (2004). Cdc14 and Condensin Control the Dissolution of Cohesin-Independent Chromosome Linkages at Repeated DNA. *Cell* 117, 455–469.

D'Aquino, K.E., Monje-Casas, F., Paulson, J., Reiser, V., Charles, G.M., Lai, L., Shokat, K.M., and Amon, A. (2005). The Protein Kinase Kin4 Inhibits Exit from Mitosis in Response to Spindle Position Defects. *Mol. Cell* 19, 223–234.

Elia, A.E.H., Rellos, P., Haire, L.F., Chao, J.W., Ivins, F.J., Hoepker, K., Mohammad, D., Cantley, L.C., Smerdon, S.J., and Yaffe, M.B. (2003). The Molecular Basis for Phosphodependent Substrate Targeting and Regulation of Plks by the Polo-Box Domain. *Cell* 115, 83–95.

Fairhead, M., and Howarth, M. (2015). Site-specific biotinylation of purified proteins using BirA. *Methods Mol. Biol. Clifton NJ* 1266, 171–184.

Feric, M., Vaidya, N., Harmon, T.S., Mitrea, D.M., Zhu, L., Richardson, T.M., Kriwacki, R.W., Pappu, R.V., and Brangwynne, C.P. (2016). Coexisting Liquid Phases Underlie Nucleolar Subcompartments. *Cell* 165, 1686–1697.

Gao, Q., Zhu, H., Dong, L., Shi, W., Chen, R., Song, Z., Huang, C., Li, J., Dong, X., Zhou, Y., et al. (2019). Integrated Proteogenomic Characterization of HBV-Related Hepatocellular Carcinoma. *Cell* 179, 1240.

Geymonat, M., Spanos, A., de Bettignies, G., and Sedgwick, S.G. (2009). Lte1 contributes to Bfa1 localization rather than stimulating nucleotide exchange by Tem1. *J. Cell Biol.* 187, 497–511.

Good, M.C., Zalatan, J.G., and Lim, W.A. (2011). Scaffold proteins: hubs for controlling the flow of cellular information. *Science* 332, 680–686.

Guertin, D.A., Trautmann, S., and McCollum, D. (2002). Cytokinesis in Eukaryotes. *Microbiol. Mol. Biol. Rev.* 66, 155–178.

Hebert, A.S., Richards, A.L., Bailey, D.J., Ulbrich, A., Coughlin, E.E., Westphall, M.S., and Coon, J.J. (2014). The one hour yeast proteome. *Mol. Cell. Proteomics MCP* 13, 339–347.

Hergovich, A., and Hemmings, B.A. (2012). Hippo signalling in the G2/M cell cycle phase: Lessons learned from the yeast MEN and SIN pathways. *Semin. Cell Dev. Biol.* *23*, 794–802.

Holt, L.J., Tuch, B.B., Villen, J., Johnson, A.D., Gygi, S.P., and Morgan, D.O. (2009). Global Analysis of Cdk1 Substrate Phosphorylation Sites Provides Insights into Evolution. *Science* *325*, 1682–1686.

Housley, M.P., Reischauer, S., Dieu, M., Raes, M., Stainier, D.Y.R., and Vanhollebeke, B. (2014). Translational profiling through biotinylation of tagged ribosomes in zebrafish. *Development* *141*, 3988–3993.

Jaspersen, S.L., and Morgan, D.O. (2000). Cdc14 activates Cdc15 to promote mitotic exit in budding yeast. *Curr. Biol.* *10*, 615–618.

Jost, A.P.-T., and Weiner, O.D. (2015). Probing Yeast Polarity with Acute, Reversible, Optogenetic Inhibition of Protein Function. *ACS Synth. Biol.* *4*, 1077–1085.

Kettenbach, A.N., Schweppe, D.K., Faherty, B.K., Pechenick, D., Pletnev, A.A., and Gerber, S.A. (2011). Quantitative Phosphoproteomics Identifies Substrates and Functional Modules of Aurora and Polo-Like Kinase Activities in Mitotic Cells. *Sci. Signal.* *4*, rs5–rs5.

Kırlı, K., Karaca, S., Dehne, H.J., Samwer, M., Pan, K.T., Lenz, C., Urlaub, H., and Görlich, D. (2015). A deep proteomics perspective on CRM1-mediated nuclear export and nucleocytoplasmic partitioning. *ELife* *4*, e11466.

Knockenbauer, K.E., and Schwartz, T.U. (2016). The Nuclear Pore Complex as a Flexible and Dynamic Gate. *Cell* *164*, 1162–1171.

König, C., Maekawa, H., and Schiebel, E. (2010). Mutual regulation of cyclin-dependent kinase and the mitotic exit network. *J. Cell Biol.* *188*, 351–368.

Kuilman, T., Maiolica, A., Godfrey, M., Scheidel, N., Aebersold, R., and Uhlmann, F. (2015). Identification of Cdk targets that control cytokinesis. *EMBO J.* *34*, 81–96.

Lee, K.S., Park, J.-E., Asano, S., and Park, C.J. (2005). Yeast polo-like kinases: functionally conserved multitask mitotic regulators. *Oncogene* *24*, 217–229.

Li, W., Cooper, J., Zhou, L., Yang, C., Erdjument-Bromage, H., Zagzag, D., Snuderl, M., Ladanyi, M., Hanemann, C.O., Zhou, P., et al. (2014). Merlin/NF2 loss-driven tumorigenesis linked to CRL4(DCAF1)-mediated inhibition of the hippo pathway kinases Lats1 and 2 in the nucleus. *Cancer Cell* *26*, 48–60.

Loughrey Chen, S., Huddleston, M.J., Shou, W., Deshaies, R.J., Annan, R.S., and Carr, S.A. (2002). Mass Spectrometry-based Methods for Phosphorylation Site Mapping of Hyperphosphorylated Proteins Applied to Net1, a Regulator of Exit from Mitosis in Yeast. *Mol. Cell. Proteomics* *1*, 186–196.

Lowery, D.M., Lim, D., and Yaffe, M.B. (2005). Structure and function of Polo-like kinases. *Oncogene* 24, 248–259.

Mah, A.S., Jang, J., and Deshaies, R.J. (2001). Protein kinase Cdc15 activates the Dbf2-Mob1 kinase complex. *Proc. Natl. Acad. Sci.* 98, 7325–7330.

Mah, A.S., Elia, A.E.H., Devgan, G., Ptacek, J., Schutkowski, M., Snyder, M., Yaffe, M.B., and Deshaies, R.J. (2005). Substrate specificity analysis of protein kinase complex Dbf2-Mob1 by peptide library and proteome array screening. *BMC Biochem.* 6, 22.

Mehnert, M., Li, W., Wu, C., Salovska, B., and Liu, Y. (2019). Combining Rapid Data Independent Acquisition and CRISPR Gene Deletion for Studying Potential Protein Functions: A Case of HMGN1. *Proteomics* 19, e1800438.

Meitinger, F., Boehm, M.E., Hofmann, A., Hub, B., Zentgraf, H., Lehmann, W.D., and Pereira, G. (2011). Phosphorylation-dependent regulation of the F-BAR protein Hof1 during cytokinesis. *Genes Dev.* 25, 875–888.

Mohl, D.A., Huddleston, M.J., Collingwood, T.S., Annan, R.S., and Deshaies, R.J. (2009). Dbf2–Mob1 drives relocalization of protein phosphatase Cdc14 to the cytoplasm during exit from mitosis. *J. Cell Biol.* 184, 527–539.

Murphy, L.O., Smith, S., Chen, R.-H., Fingar, D.C., and Blenis, J. (2002). Molecular interpretation of ERK signal duration by immediate early gene products. *Nat. Cell Biol.* 4, 556–564.

Nakajima, H., Toyoshima-Morimoto, F., Taniguchi, E., and Nishida, E. (2003). Identification of a Consensus Motif for Plk (Polo-like Kinase) Phosphorylation Reveals Myt1 as a Plk1 Substrate\*. *J. Biol. Chem.* 278, 25277–25280.

Neville, M. (1999). The NES-Crm1p export pathway is not a major mRNA export route in *Saccharomyces cerevisiae*. *EMBO J.* 18, 3746–3756.

Owen, I., and Shewmaker, F. (2019). The Role of Post-Translational Modifications in the Phase Transitions of Intrinsically Disordered Proteins. *Int. J. Mol. Sci.* 20, 5501.

Pereira, G., Höfken, T., Grindlay, J., Manson, C., and Schiebel, E. (2000). The Bub2p Spindle Checkpoint Links Nuclear Migration with Mitotic Exit. *Mol. Cell* 6, 1–10.

Perez-Riverol, Y., Csordas, A., Bai, J., Bernal-Llinares, M., Hewapathirana, S., Kundu, D.J., Inuganti, A., Griss, J., Mayer, G., Eisenacher, M., et al. (2019). The PRIDE database and related tools and resources in 2019: improving support for quantification data. *Nucleic Acids Res.* 47, D442–D450.

Queralt, E., Lehane, C., Novak, B., and Uhlmann, F. (2006). Downregulation of PP2A<sup>Cdc55</sup> Phosphatase by Separase Initiates Mitotic Exit in Budding Yeast. *Cell* 125, 719–732.



Ricicova, M., Hamidi, M., Quiring, A., Niemisto, A., Emberly, E., and Hansen, C.L. (2013). Dissecting genealogy and cell cycle as sources of cell-to-cell variability in MAPK signaling using high-throughput lineage tracking. *Proc. Natl. Acad. Sci.* *110*, 11403–11408.

Rock, J.M., and Amon, A. (2009). The FEAR network. *Curr. Biol.* *CB 19*, R1063-1068.

Rock, J.M., and Amon, A. (2011). Cdc15 integrates Tem1 GTPase-mediated spatial signals with Polo kinase-mediated temporal cues to activate mitotic exit. *Genes Dev.* *25*, 1943–1954.

Rock, J.M., Lim, D., Stach, L., Ogrodowicz, R.W., Keck, J.M., Jones, M.H., Wong, C.C.L., Yates, J.R., Winey, M., Smerdon, S.J., et al. (2013). Activation of the Yeast Hippo Pathway by Phosphorylation-Dependent Assembly of Signaling Complexes. *Science* *340*, 871–875.

Romero, P., Obradovic, Z., Kissinger, C., Villafranca, J.E., and Dunker, A.K. (1997). Identifying disordered regions in proteins from amino acid sequence. In *Proceedings of International Conference on Neural Networks (ICNN'97)*, (Houston, TX, USA: IEEE), pp. 90–95.

Sanchez, Y. (1999). Control of the DNA Damage Checkpoint by Chk1 and Rad53 Protein Kinases Through Distinct Mechanisms. *Science* *286*, 1166–1171.

Shcherbakova, D.M., and Verkhusha, V.V. (2013). Near-infrared fluorescent proteins for multicolor in vivo imaging. *Nat. Methods* *10*, 751–754.

Shin, Y., and Brangwynne, C.P. (2017). Liquid phase condensation in cell physiology and disease. *Science* *357*, eaaf4382.

Shou, W., Seol, J.H., Shevchenko, A., Baskerville, C., Moazed, D., Chen, Z.W.S., Jang, J., Shevchenko, A., Charbonneau, H., and Deshaies, R.J. (1999). Exit from Mitosis Is Triggered by Tem1-Dependent Release of the Protein Phosphatase Cdc14 from Nucleolar RENT Complex. *Cell* *97*, 233–244.

Shou, W., Azzam, R., Chen, S.L., Huddleston, M.J., Baskerville, C., Charbonneau, H., Annan, R.S., Carr, S.A., and Deshaies, R.J. (2002). Cdc5 influences phosphorylation of Net1 and disassembly of the RENT complex. *BMC Mol. Biol.* *14*.

Stegmeier, F., and Amon, A. (2004). Closing Mitosis: The Functions of the Cdc14 Phosphatase and Its Regulation. *Annu. Rev. Genet.* *38*, 203–232.

Stegmeier, F., Visintin, R., and Amon, A. (2002). Separase, Polo Kinase, the Kinetochore Protein Slk19, and Spo12 Function in a Network that Controls Cdc14 Localization during Early Anaphase. *Cell* *108*, 207–220.

Stoepel, J., Ottey, M.A., Kurischko, C., Hieter, P., and Luca, F.C. (2005). The Mitotic Exit Network Mob1p-Dbf2p Kinase Complex Localizes to the Nucleus and Regulates Passenger Protein Localization. *Mol. Biol. Cell* *16*, 15.



Sullivan, M., Higuchi, T., Katis, V.L., and Uhlmann, F. (2004). Cdc14 Phosphatase Induces rDNA Condensation and Resolves Cohesin-Independent Cohesion during Budding Yeast Anaphase. *Cell* 117, 471–482.

Swaney, D.L., Beltrao, P., Starita, L., Guo, A., Rush, J., Fields, S., Krogan, N.J., and Villén, J. (2013). Global analysis of phosphorylation and ubiquitylation cross-talk in protein degradation. *Nat. Methods* 10, 676–682.

Torres-Rosell, J., Machín, F., Jarmuz, A., and Aragón, L. (2004). Nucleolar Segregation Lags Behind the Rest of the Genome and Requires Cdc14p Activation by the FEAR Network. *Cell Cycle* 3, 494–500.

Villén, J., and Gygi, S.P. (2008). The SCX/IMAC enrichment approach for global phosphorylation analysis by mass spectrometry. *Nat. Protoc.* 3, 1630–1638.

Visintin, R., and Amon, A. (2001). Regulation of the mitotic exit protein kinases Cdc15 and Dbf2. *Mol. Biol. Cell* 12, 2961–2974.

Visintin, C., Tomson, B.N., Rahal, R., Paulson, J., Cohen, M., Taunton, J., Amon, A., and Visintin, R. (2008). APC/C-Cdh1-mediated degradation of the Polo kinase Cdc5 promotes the return of Cdc14 into the nucleolus. *Genes Dev.* 22, 79–90.

Visintin, R., Hwang, E.S., and Amon, A. (1999). Cfi1 prevents premature exit from mitosis by anchoring Cdc14 phosphatase in the nucleolus. *398*, 6.

Yang, X., Jost, A.P.-T., Weiner, O.D., and Tang, C. (2013). A light-inducible organelle-targeting system for dynamically activating and inactivating signaling in budding yeast. *Mol. Biol. Cell* 24, 2419–2430.

Yu, F.-X., and Guan, K.-L. (2013). The Hippo pathway: regulators and regulations. *Genes Dev.* 27, 355–371.

## SUPPLEMENTARY DATA

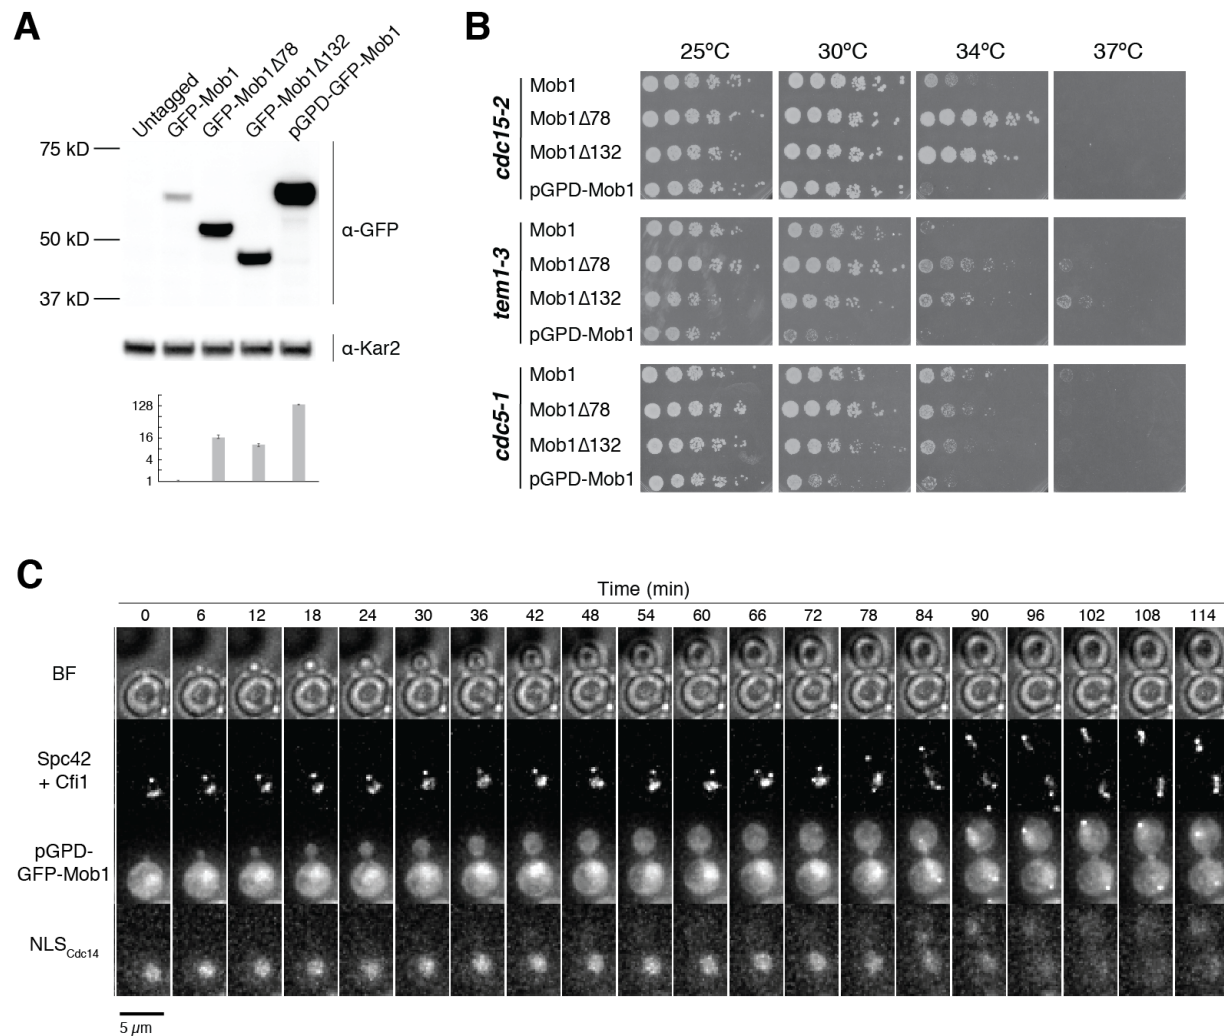

### Figure S1. N-terminally truncated Mob1 is hyperactive, Related to Figure 1

(A) Immunoblot (top) and quantification (bottom) of untagged (A2587), full-length (A41351) and truncated GFP-Mob1 (A41352, A41353) as well as full-length GFP-Mob1 expressed from the *pGPD/TDH3* promoter (A41350).

(B) 5-fold serial dilutions of *cdc15-2* (A41424, A41425, A41426, A41427), *tem1-3* (A41429, A41430, A41431, A41428) and *cdc5-1* (A41432, A41433, A41434, A41435) harboring the indicated *MOB1* constructs in YEP + 2% glucose at the indicated temperatures.

(C) Localization of GFP-Mob1 expressed under the control of *pGPD* promoter (A41595) during the cell cycle. Cells were grown and imaged as in Figure 1E. Increased nuclear but not nucleolar localization of Mob1 was observed.

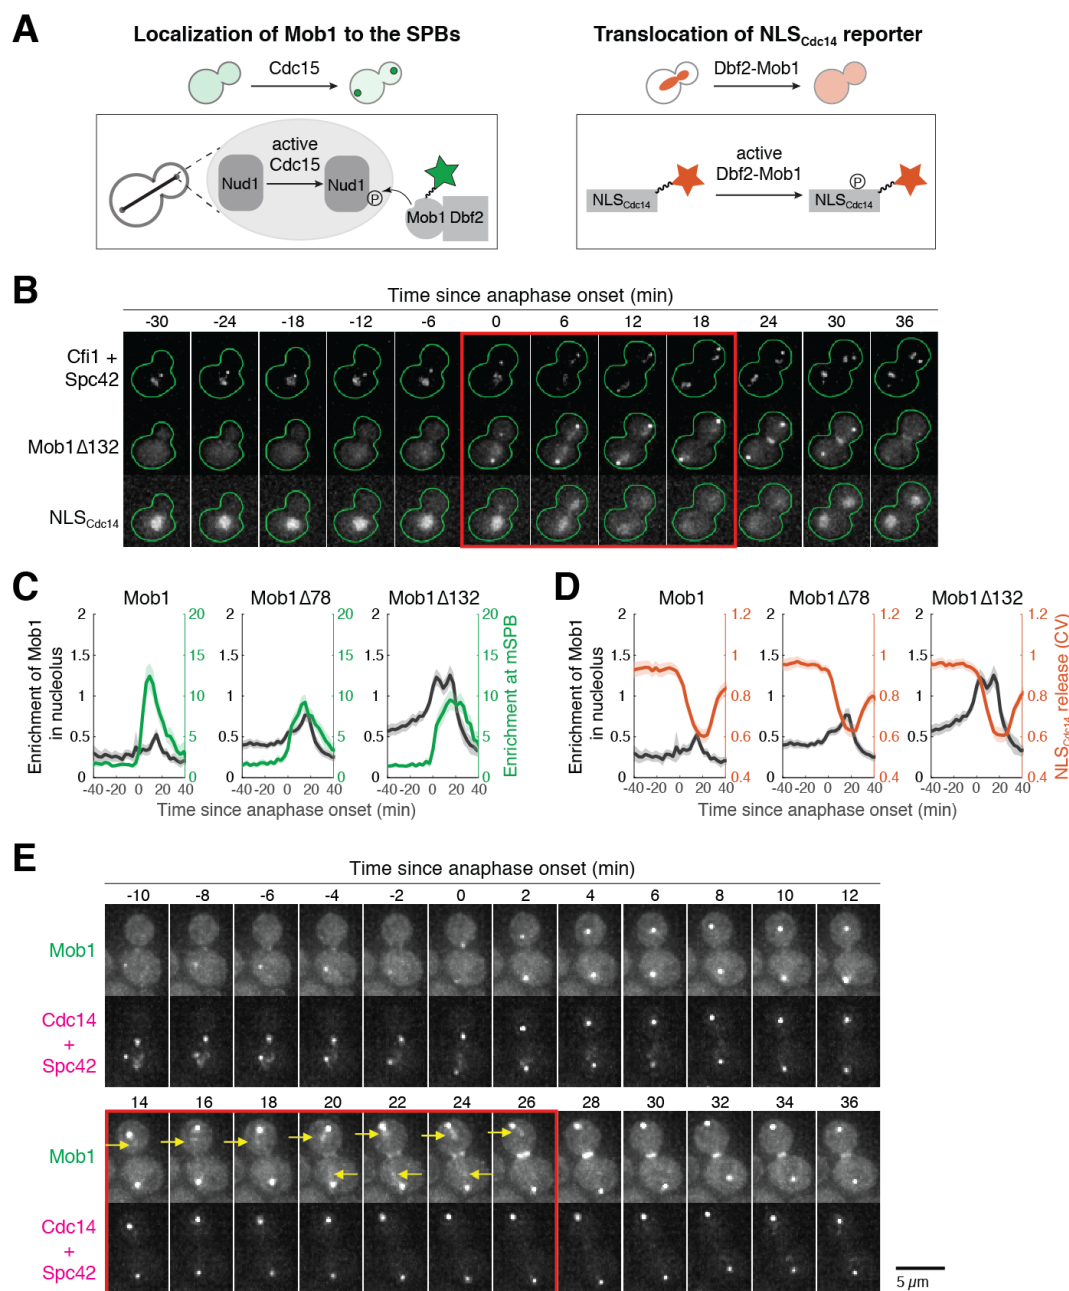

**Figure S2. Mob1's nucleolar localization correlates with MEN activation and Cdc14 release from the nucleolus, Related to Figure 1**

(A) Illustration of Mob1's SPB localization and translocation of NLS<sub>Cdc14</sub> reporter in response to MEN activation.

(B) Localization of Mob1Δ132 and the MEN activity reporter NLS<sub>Cdc14</sub> during the cell cycle. A41213 (*GFP-MOB1Δ132*, *CFI1/NET1-mCherry*, *SPC42-mCherry* and *NLS<sub>Cdc14</sub>-ymiRFP670*) cells were grown as in Figure 1E. Red square indicates anaphase.

(C) Relative timing of nucleolar localization of Mob1 (black) and SPB localization of Mob1 (green) in cells harboring the indicated *MOBI* alleles.

(D) Relative timing of nucleolar localization of Mob1 (black) and release of the NLS<sub>Cdc14</sub> reporter from the nucleus (red) in cells harboring the indicated *MOBI* alleles.

(E) Localization of Mob1 and Cdc14 during the cell cycle. A40314 (*MOBI-eGFP*, *SPC42-mCherry* and *CDC14-mCherry*) cells were grown at room temperature in SC medium + 2% glucose and imaged every 2 minutes for 4 hours. The red square indicates the frames where Mob1 localizes to the nucleolus and Cdc14 is fully released from the nucleolus.

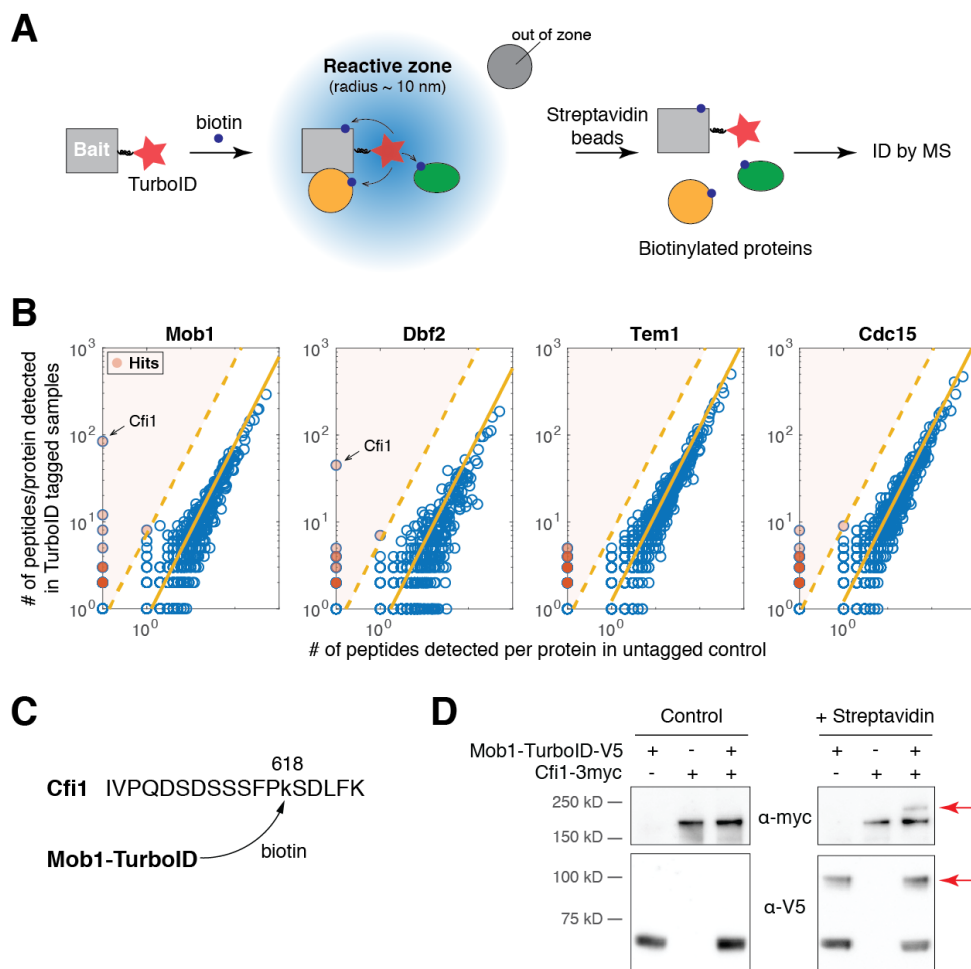

**Figure S3. TurboID identified interaction between Dbf2-Mob1 and Cfi1/Net1, Related to Figure 2**

(A) Overview of TurboID proximity-based biotinylation to identify interaction partners of a target protein.

(B) Number of total peptides detected for MS-identified proteins in cells with TurboID tagged baits relative to untagged control cells (source data for Figure 2A). Shaded red dots represent proteins (hits) identified as interaction partners of the bait protein. Solid yellow lines denote the mean ratio of total peptide detected for all proteins. Dashed lines denote the threshold used for identifying hits (10 standard deviations above the mean).

(C) Biotinylated peptide of Cfi1/Net1 detected in cells harboring Mob1-TurboID.

(D) Streptavidin gel-shift assay to probe the interaction between Mob1 and Cfi1/Net1. Lysates of A41379, A1638, and A41372 cells with or without streptavidin treatment were immunoblotted as indicated. Red arrows highlight biotinylated proteins.



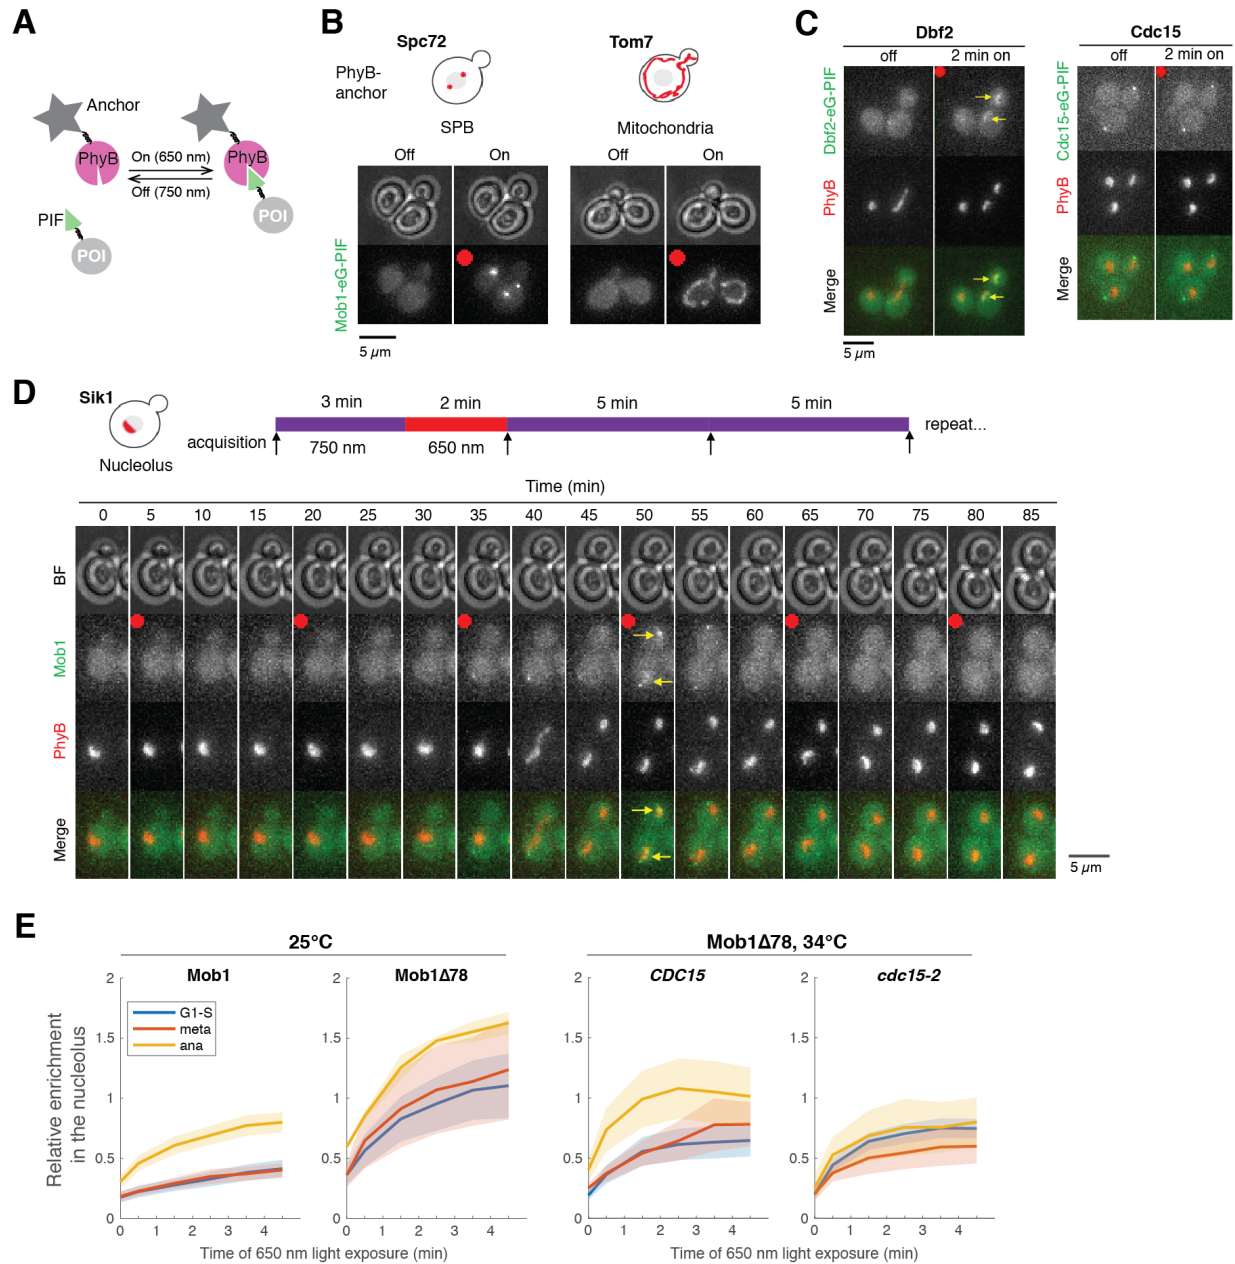

**Figure S4. Examining nuclear access of Dbf2-Mob1 by optogenetics, Related to Figure 3**

(A) The PhyB-PIF based light-inducible organelle targeting system. When exposed to 650 nm light, anchored PhyB interacts with PIF and thus targets protein of interest (POI) to designated subcellular regions. This interaction is reversed with exposure to 750 nm light.

(B) Recruiting Mob1 to SPBs (A40346) or the mitochondrial surface (A40354) with the PhyB-PIF optogenetics system. Cells were grown at room temperature in SC medium + 2% glucose, incubated with 12.5  $\mu$ M PCB for 2 hours in the dark prior to imaging. Red dots indicate application of red light (650 nm) for 5 minutes to activate PhyB.

(C) Recruiting Dbf2 (A40262) or Cdc15 (A40258) to the nucleolus with PhyB-Sik1. Cells were grown similarly to (B). Yellow arrows highlight the light-induced recruitment.

(D) Probing Mob1's nuclear access during the cell cycle with PhyB-Sik1. A40260 cells were grown similarly to (B) and imaged every 5 minutes while the red light (650 nm) was applied for 2 minutes every 15 minutes. Red dots denote frames where 650 nm light was applied to activate PhyB prior to imaging as indicated in the cartoon above. Yellow arrows highlight the light-induced recruitment.

(E) Quantifications of enrichment of Mob1 in the nucleolus as a function of PhyB activation time for wild-type Mob1 (A41360;  $n = 22, 14,$  and  $21$  cells for G1-S, metaphase and anaphase respectively), Mob1 $\Delta$ 78 (A41366;  $n = 11, 6,$  and  $2$  cells for G1-S, metaphase and anaphase respectively) at 25°C and for Mob1 $\Delta$ 78 in *CDC15* (A41366;  $n = 25, 4,$  and  $9$  cells for G1-S, metaphase and anaphase respectively) or *cdc15-2* cells (A41365;  $n = 39, 9,$  and  $10$  cells for G1-S, metaphase and anaphase respectively) at 34°C. Cells were grown similarly to (B).



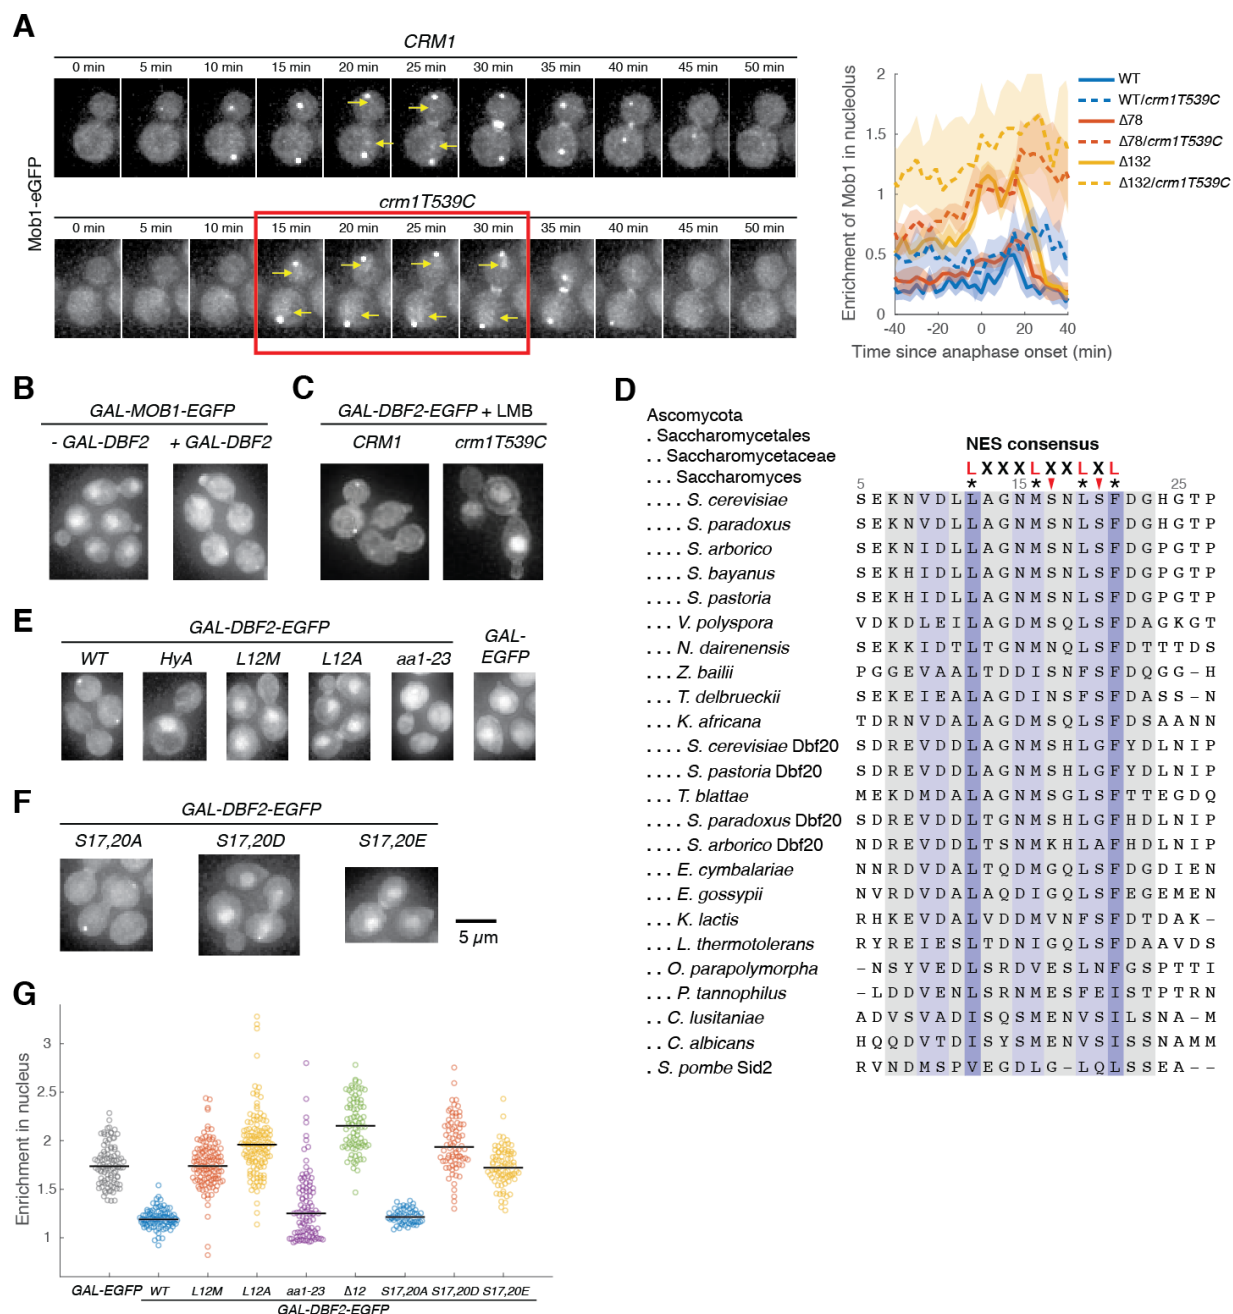

**Figure S5. Identification of a functional NES in Dbf2, Related to Figure 3**

(A) Mob1's cellular localization when nuclear export is inhibited. Left, cells (A39893, A41349) were grown at room temperature in SC medium + 2% glucose and leptomycin B. Red box indicates anaphase and yellow arrows highlight increased nuclear and nucleolar localization. Right, comparison of nucleolar enrichment of Mob1 in *CRM1* (A41211, A41212 and A41213;  $n = 12$ , 18 and 11 cells respectively) and *crm1T539C* cells (A41373, A41374 and A41375;  $n = 13$ ,

9 and 16 cells respectively). Cells were grown at 25°C in SC medium + 2% glucose with 100 ng/ml LMB and imaged every 3 minutes for 4 hours.

**(B)** Localization of overexpressed Mob1-eGFP from the *GALI-10* promoter with (A41363) or without (A41364) co-overexpressing Dbf2 from the same promoter. Cells were grown in SC medium + 2% raffinose and mounted onto agarose pads made with SC medium + 1% raffinose and 1% galactose.

**(C)** Localization of overexpressed Dbf2-eGFP with (A41383) or without (A41384) inhibiting Crm1 with LMB. Cells were grown in SC medium + 2% raffinose and mounted onto agarose pad made with SC medium + 1% raffinose, 1% galactose and 100 ng/ml LMB.

**(D)** Alignment of Dbf2 homologs in *Saccharomyces* and *S. pombe*.

**(E-G)** Localization of various Dbf2-eGFP mutants expressed from the *GALI-10* promoter (A41388, A41389, A41386, A41390, A41391, A41392, A41393, A41440, A41441 and A41442;  $n = 97, 98, 123, 135, 120, 88, 58, 76$  and  $79$  cells respectively). Cells were grown as in (B) and analyzed after 5 hours of growth in galactose containing medium.

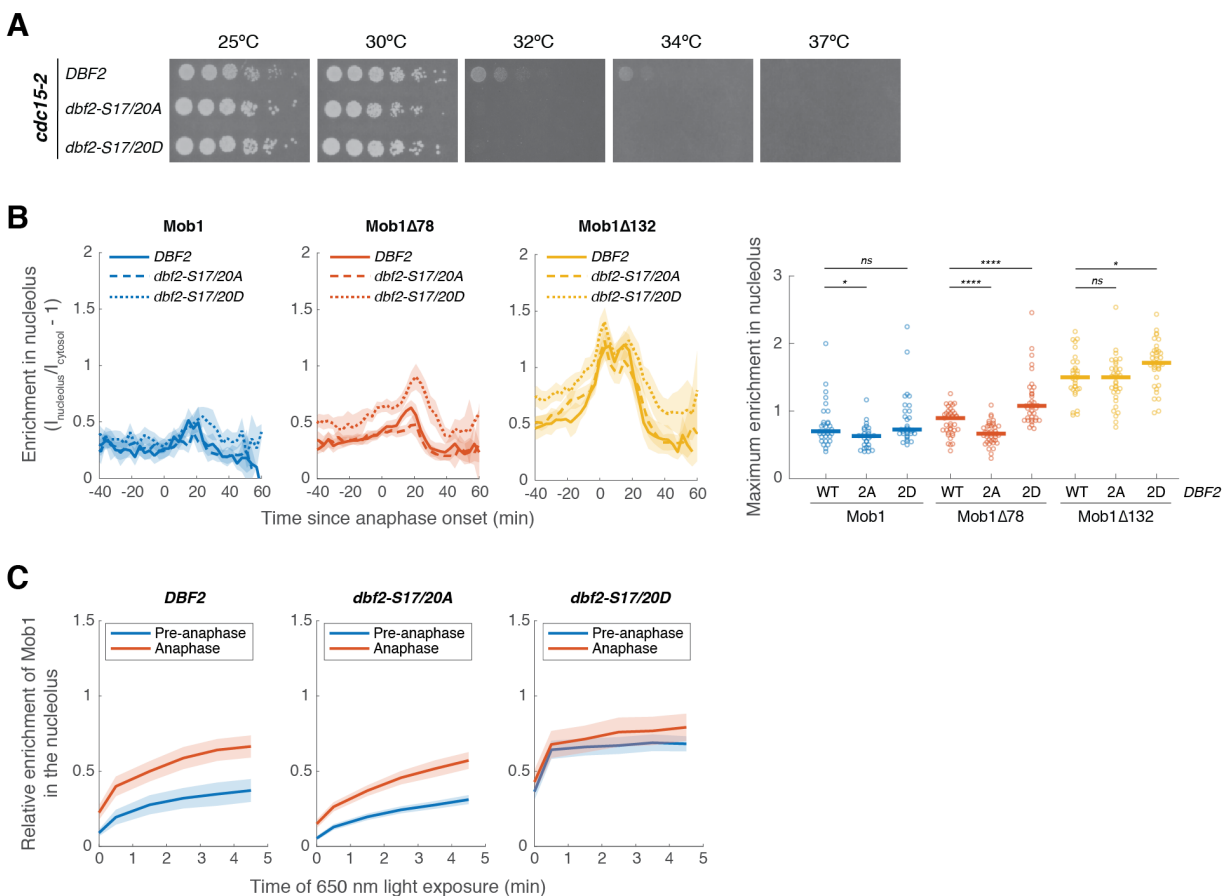

**Figure S6. Phosphorylation of Dbf2's NES partially regulates Dbf2-Mob1's nuclear access, Related to Figure 3**

(A) 5-fold serial dilutions of *cdc15-2* cells harboring wild-type *DBF2* (A41624), *dbf2-S17/20A* (A41625) or *dbf2-S17/20D* (A41626) in YEP + 2% glucose at the indicated temperatures.

(B) Nucleolar enrichment of wild-type and truncated Mob1 in wild-type, *dbf2-S17/20A* or *dbf2-S17/20D* cells (A41614, A41617, A41620, A41615, A41618, A41621, A41616, A41619, A41622;  $n = 32, 28, 33, 39, 43, 37, 31, 35$  and  $37$  cells respectively). Cells were grown and imaged as in Figure 1E. Solid lines represent the average, shaded areas represent 95% confidence intervals. For maximum enrichment, each dot represents a single cell. Solid lines represent the median. \*\*\*\* $P < 0.0001$ ; \* $P < 0.05$  by two-sided Wilcoxon rank sum test.

(C) Quantifications of enrichment of Mob1 in the nucleolus as a function of PhyB activation time for wild-type *DBF2* (A41608;  $n = 42$  and  $24$  cells for pre-anaphase and anaphase, respectively), *dbf2-S17/20A* (A41609;  $n = 55$  and  $41$  cells for pre-anaphase and anaphase, respectively) and *dbf2-S17/20D* (A41610;  $n = 58$  and  $28$  cells for pre-anaphase and anaphase, respectively). Cells were grown as in Figure S4B.

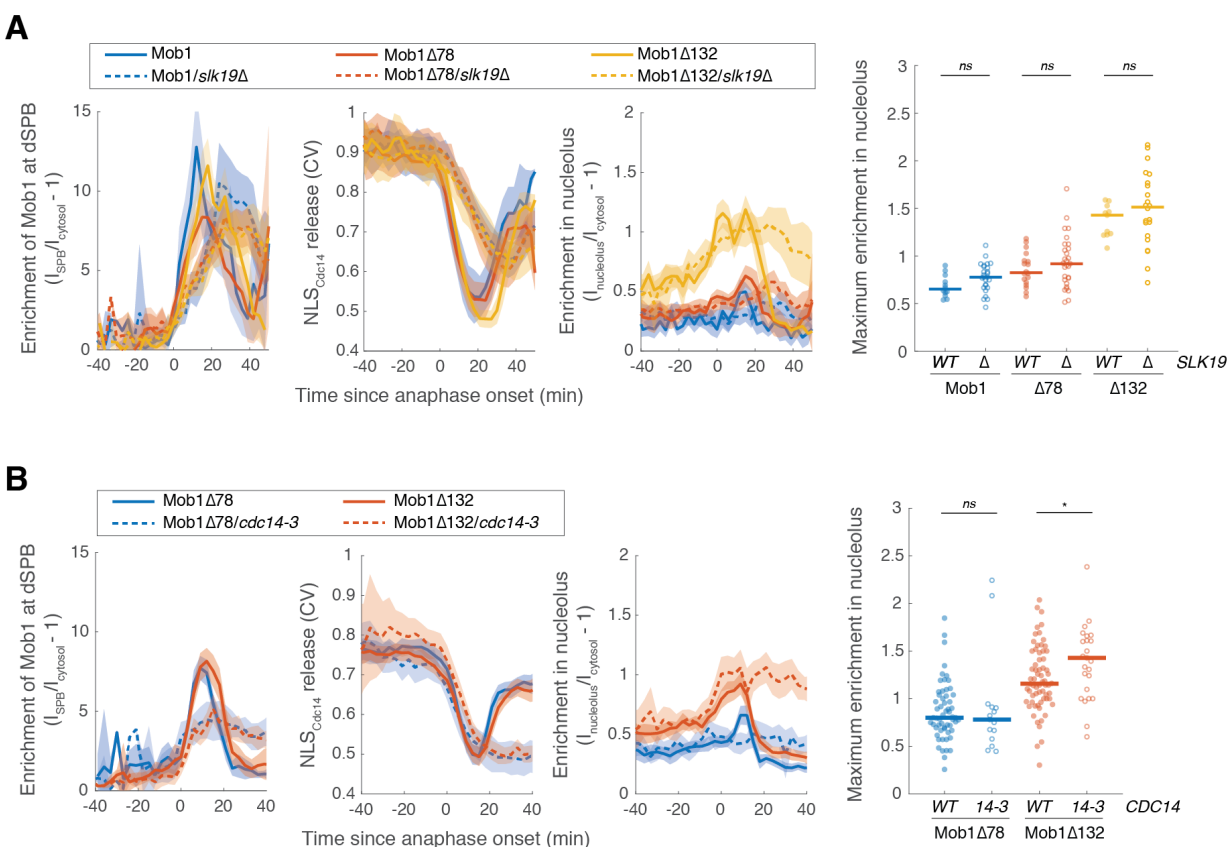

**Figure S7. Nucleolar localization of Dbf2-Mob1 does not depend on the FEAR network, Related to Figure 4**

(A) Enrichment of Mob1 at the dSPB, in the nucleolus, and Dbf2-Mob1's kinase activity in wild-type (A41211, A41212 and A41213;  $n = 12, 18, 11$ ) or *slk19*Δ (A41357, A41358, A41359;  $n = 26, 29, 22$  cells) cells. Cells were grown at 25°C in SC medium + 2% glucose and imaged every 3 minutes for 4 hours.

(B) Enrichment of Mob1 at the dSPB, in the nucleolus, and Dbf2-Mob1's kinase activity in wild-type (A41212 and A41213;  $n = 58$  and 66 cells) or *cdc14-3* (A41355 and A41356;  $n = 15$  and 25 cells) cells. Cells were grown at 34°C in SC medium + 2% glucose and imaged every 3 minutes for 4 hours. For all graphs, solid lines represent the average of single cell traces aligned to anaphase onset. Shaded areas represent 95% confidence intervals. For maximum enrichment, each dot represents a single cell. The solid lines represent the median. \* $P < 0.05$ ; ns, not significant ( $P > 0.05$ ) by two-sided Wilcoxon rank sum test.

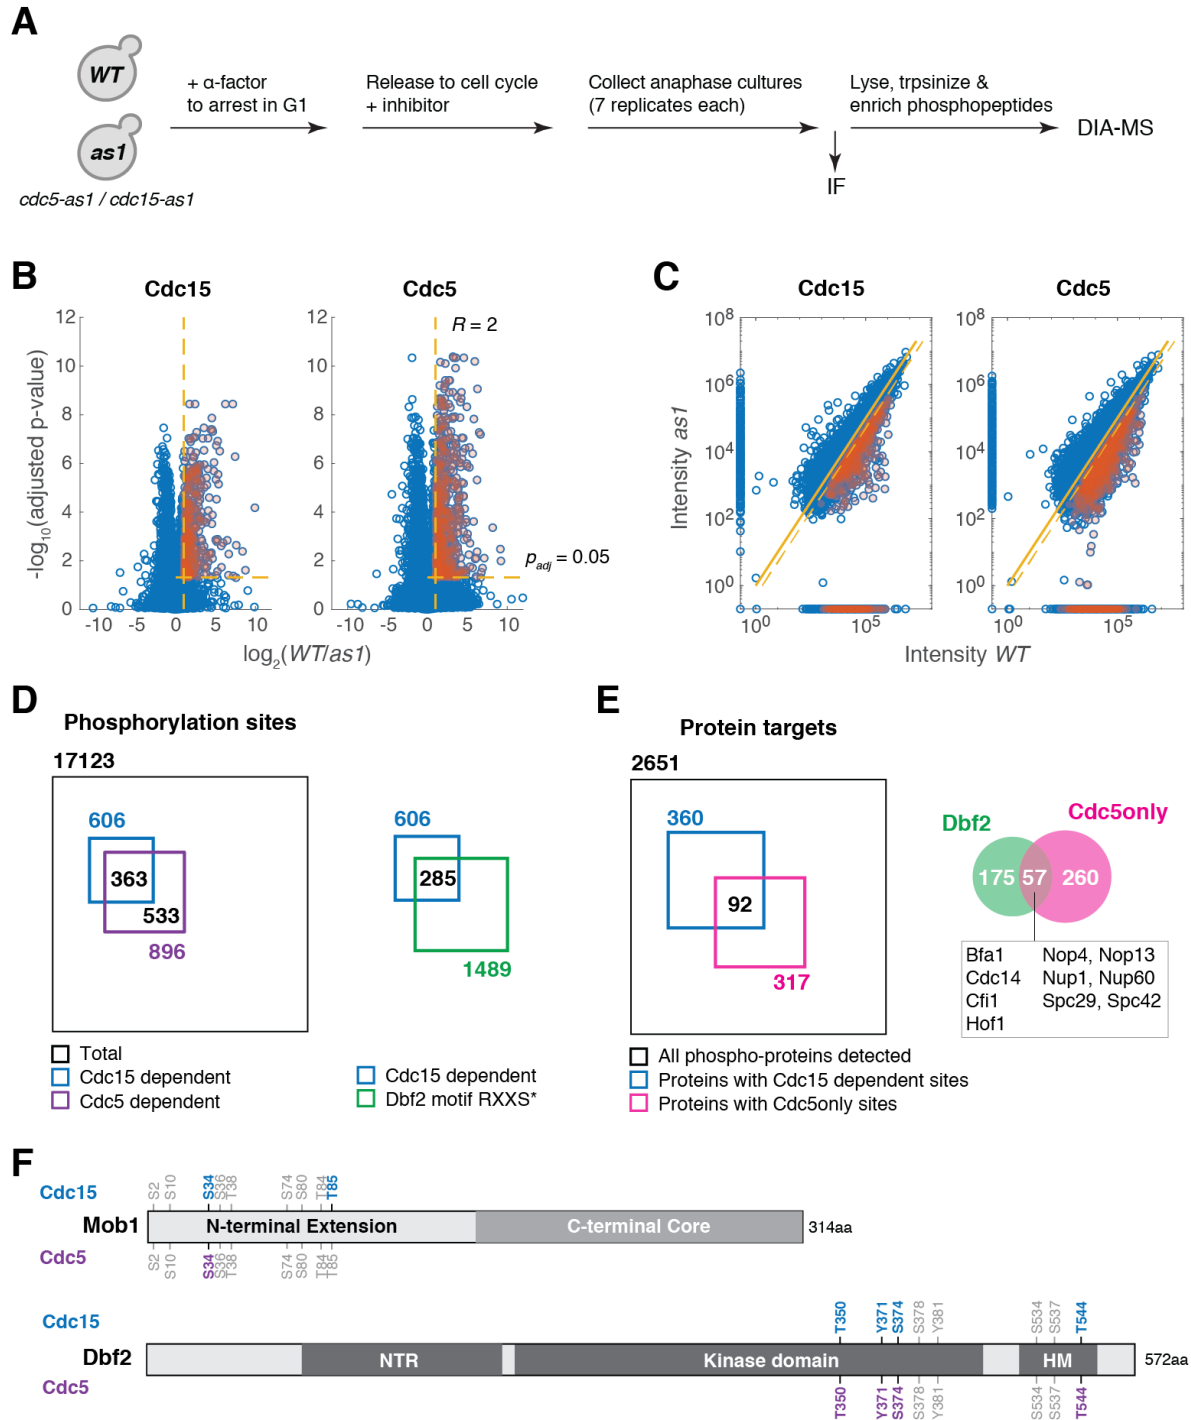

**Figure S8. Phosphoproteomics identifies *CDC15* (MEN) and *CDC5* dependent phosphorylation in anaphase, Related to Figure 5**

(A) Overview of the sample preparation for phosphoproteomics analysis to map *CDC15* (MEN) and *CDC5* dependent phosphorylation in anaphase. Paired wild-type (*WT*, A2587) and *cdc15-as1* (A10991) or paired wild-type and *cdc5-as1* (A40903) cultures were synchronized in G1 with

$\alpha$ -factor (5  $\mu$ g/ml). After 150 minutes cells were released into fresh medium with the corresponding inhibitors in the absence of pheromone at room temperature. After ~100 minutes cells were harvested to extract proteins and processed for data-independent acquisition mass spectrometry (DIA-MS) analysis with 7 technical replicates for each sample. Immunofluorescence (IF) using an anti-tubulin antibody was performed on the collected cells to determine the percentage of cells with anaphase spindle (~70% for wild-type cells and ~95% for *cdc5-as1* and *cdc15-as1* cells).

**(B)** Volcano plots of  $-\log_{10}$  transformed FDR adjusted  $P$ -value versus  $\log_2$ (fold change or ratio) of intensities measured for peptides identified in anaphase cells with *WT* or analog-sensitive (*as1*) alleles of *CDC15* or *CDC5*. Yellow dashed lines indicate the cutoff ( $R > 2$  and  $p_{adj} < 0.05$ ) used to identify peptides whose phosphorylation depends on the corresponding kinase as marked with red shaded dots.

**(C)** Correlations of peptide intensity in *WT* and *as1* samples for Cdc15 and Cdc5 inhibition in anaphase. Data points on the axis represent peptides that were only detected in one sample but not the other. Red shaded dots denote hits for *CDC15* or *CDC5*-dependent phosphopeptides identified based on the cutoff described in (B) and for peptides that were detected in at least 5 out of 7 replicates in *WT* samples but were missing in *as1* samples (thus no fold change could be calculated).

**(D-E)** Summary of phosphorylation sites (D) and phospho-proteins (E) determined as *CDC15*- or *CDC5*-dependent. Potential Dbf2-Mob1 targets were identified as *CDC15*-dependent and to fit the Dbf2 phosphorylation consensus motif RXXS\*, where \* denotes the site of phosphorylation. Cdc5-only sites are sites that are *CDC5*-dependent but not *CDC15*-dependent.

**(F)** *CDC15*- and *CDC5*-dependent sites in Mob1 and Dbf2. Light gray sites represent sites that were detected but were not determined as either *CDC15*- or *CDC5*-dependent.



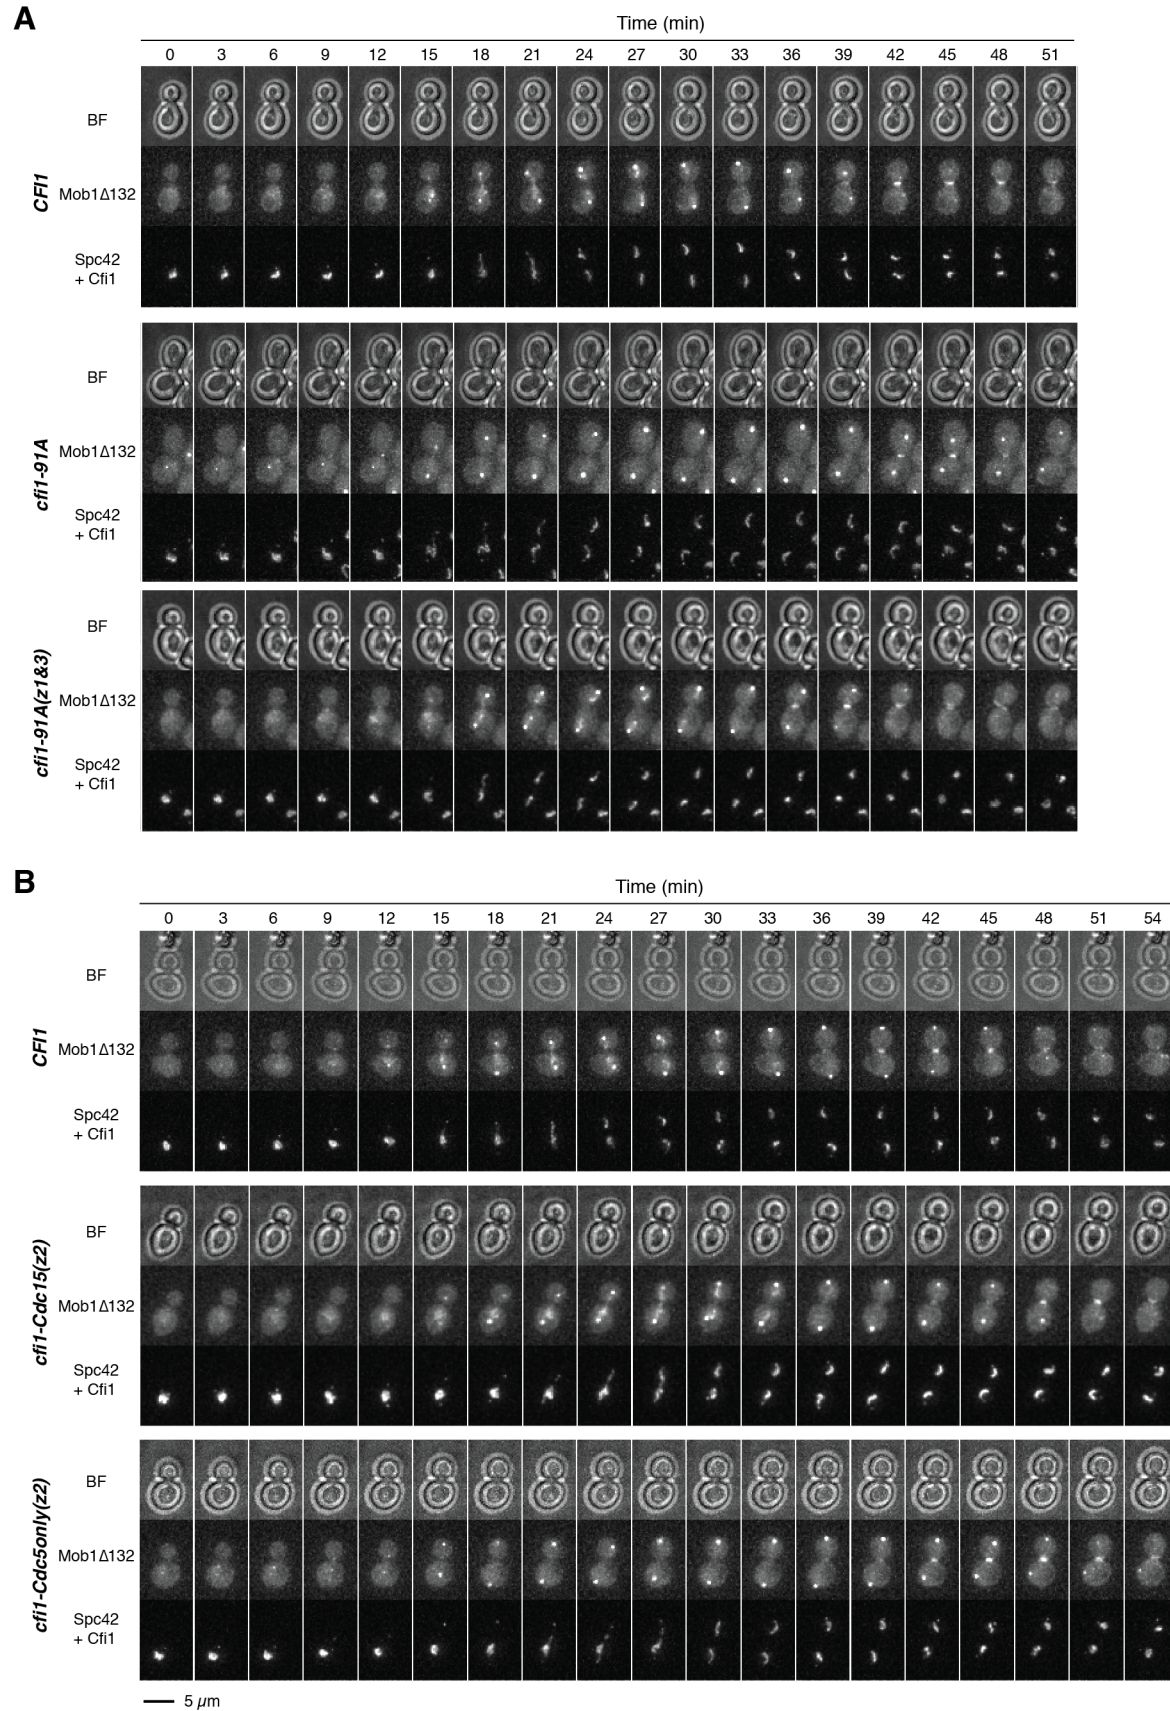



**Figure S9. Phosphorylation of Cfi1/Net1 modulates Dbf2-Mob1's nucleolar localization,  
Related to Figure 5**

(A-B) Representative images of Mob1 $\Delta$ 132 localization in *CFII/NET1* (A41411), *cfi1-91A* (A41412 and A41413), *cfi1-Cdc15(z2)* (A41593) or *cfi1-Cdc5only(z2)* (A41594) cells.

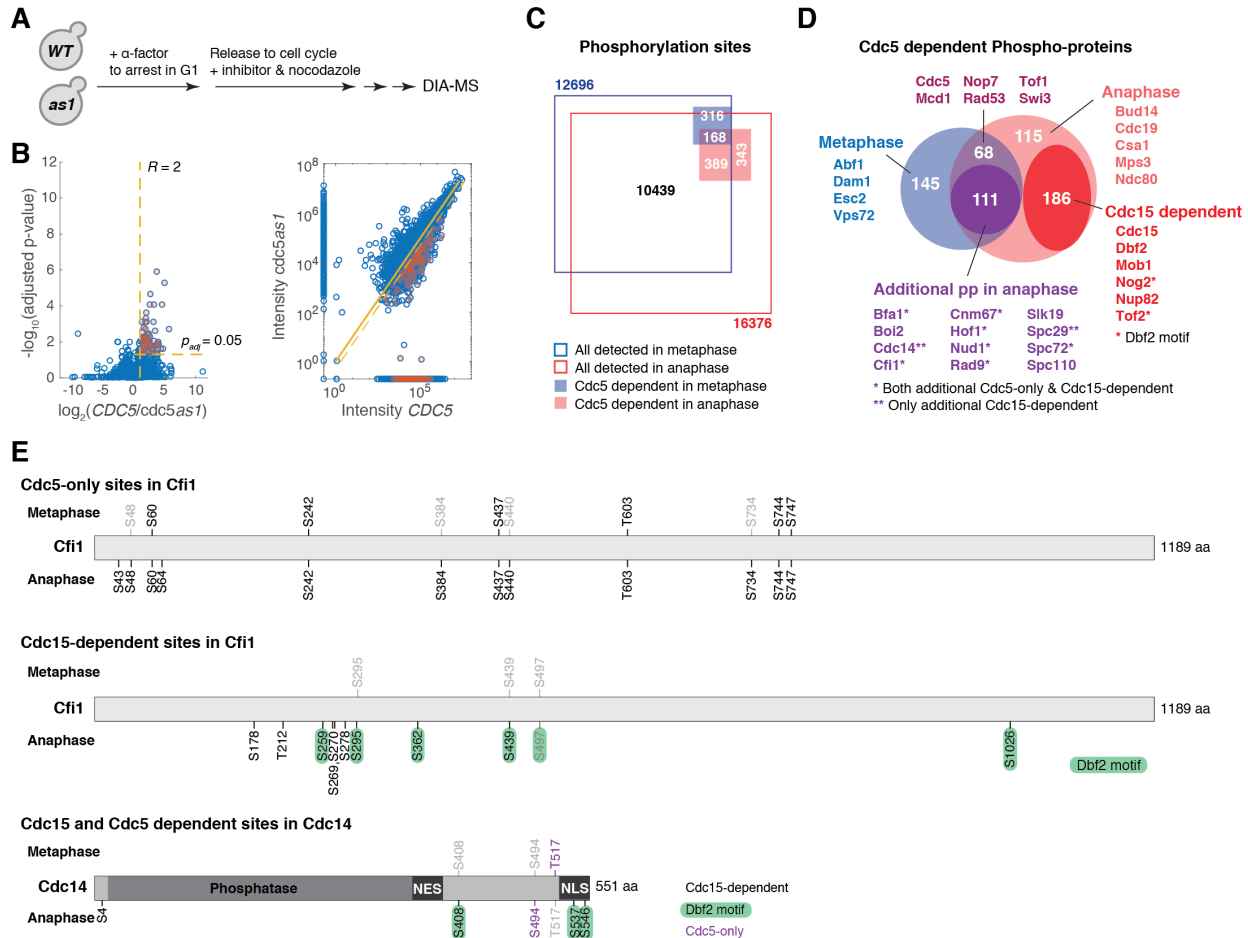

(E) *CDC5*-only and *CDC15*-dependent sites in Cfi1/Net1 and Cdc14 mapped in metaphase and anaphase. Light gray sites in metaphase/anaphase represent phosphorylation sites that were detected but were not determined as *CDC5*-dependent.



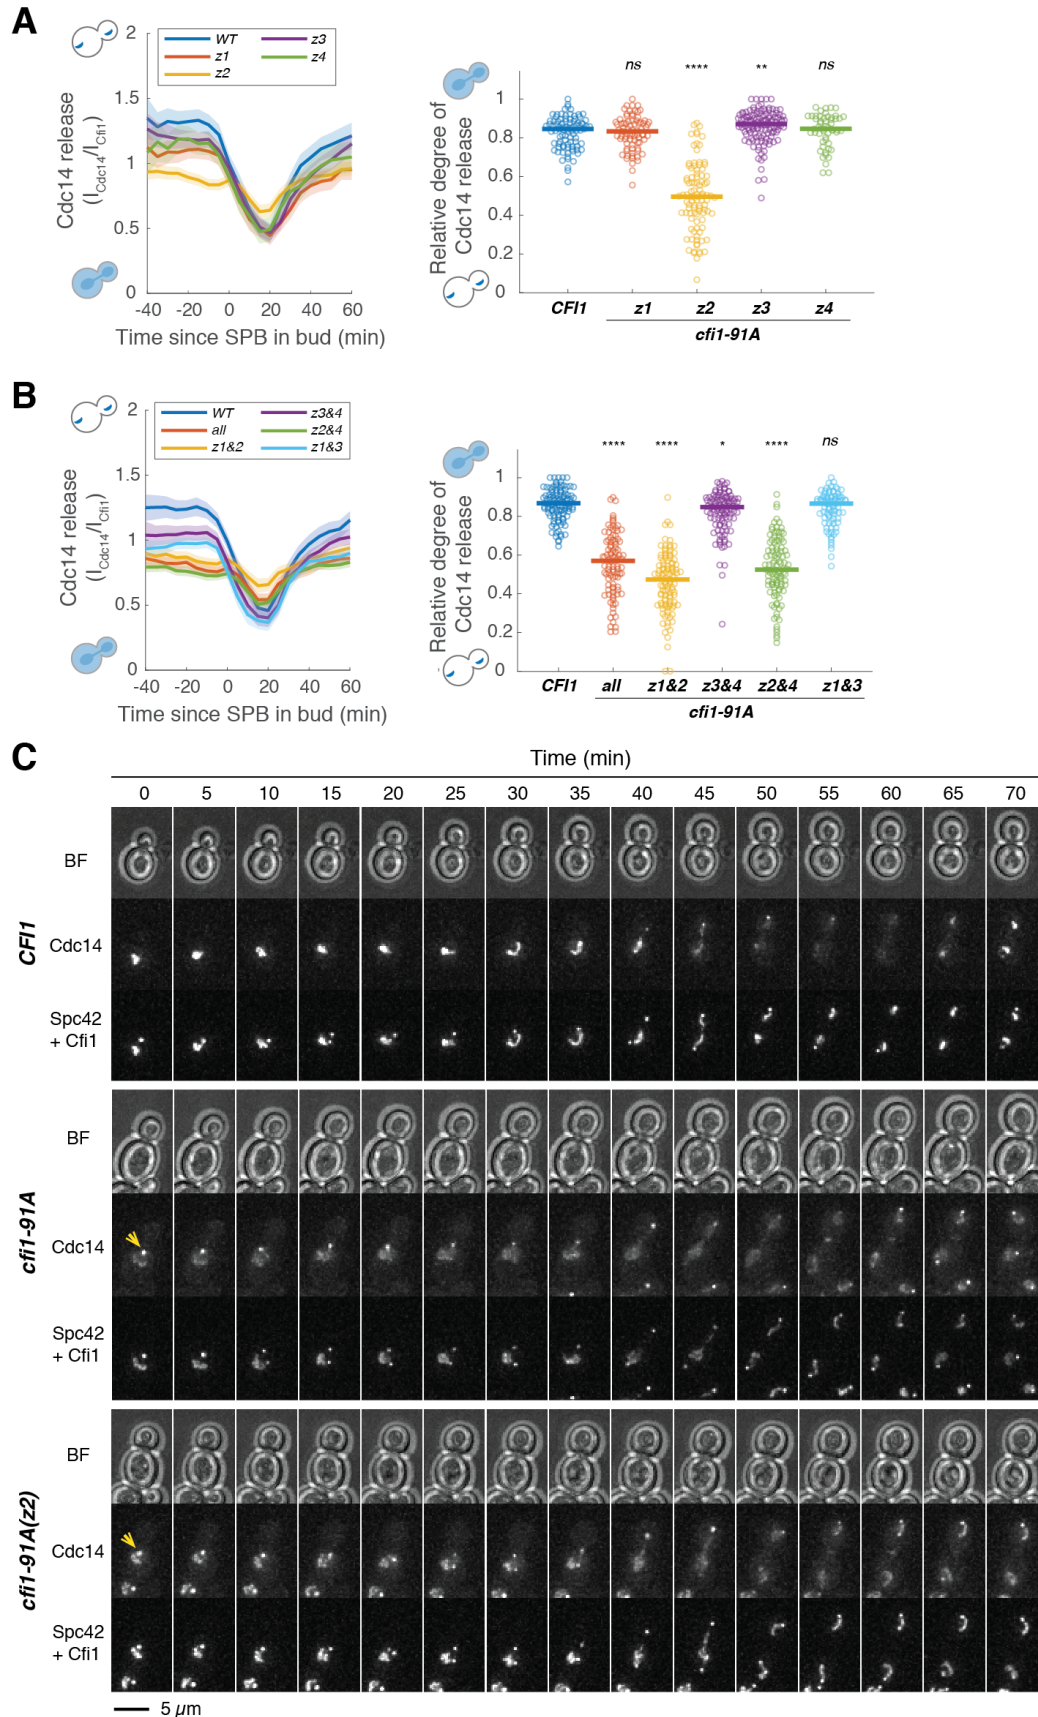

## Figure S12. Phosphorylation in zone 2 of Cfi1/Net1 regulates Cdc14 release from the nucleolus, Related to Figure 6

(A-B) Kinetics of Cdc14 release from the nucleolus in cells harboring wild-type *CFII/NET1* (A41387,  $n = 103$  cells for A,  $n = 130$  cells for B) or different *CFII/NET1* phospho-null mutants (A41398, A41399, A41400, A41401, A41404, A41405, A41397, A41402 and A41403;  $n = 95, 103, 146, 59, 102, 113, 128, 114$  and  $102$  cells respectively). Cells were grown at 25°C in SC medium + 2% glucose and imaged every 5 minutes for 5 hours. Release of Cdc14 from the nucleolus was quantified as the ratio of fluorescence intensity of Cdc14-eGFP to Cfi1/Net1-mScarlet in the nucleolus ( $I_{Cdc14}/I_{Cfi1}$ ). Relative degree of Cdc14 release from the nucleolus was calculated as the normalized minimal Cdc14 level in the nucleolus:  $(I_{Cdc14}(t_{min})/I_{Cfi1}(t_{min}))/ (I_{Cdc14}(t_{-20})/I_{Cfi1}(t_{-20}))$  where  $t_{min}$  represents the frame with minimal Cdc14 levels in the nucleolus and  $t_{-20}$  represent 20 min before movement of the SPB into bud. Each dot represents a single cell and the solid lines represent the median. \*\*\*\* $P < 0.0001$ ; \*\* $P < 0.01$ ; \* $P < 0.05$  by two-sided Wilcoxon rank sum test.

(C) Representative images showing Cdc14 nucleolar release kinetics for cells harboring wild-type *CFII/NET1* (A41387) or *CFII/NET1* phospho-mutants with all 91 sites (A41404) or only sites in zone 2 (A41399) mutated to alanine. Yellow arrows highlight localization of Cdc14 at dSPB prior to anaphase.



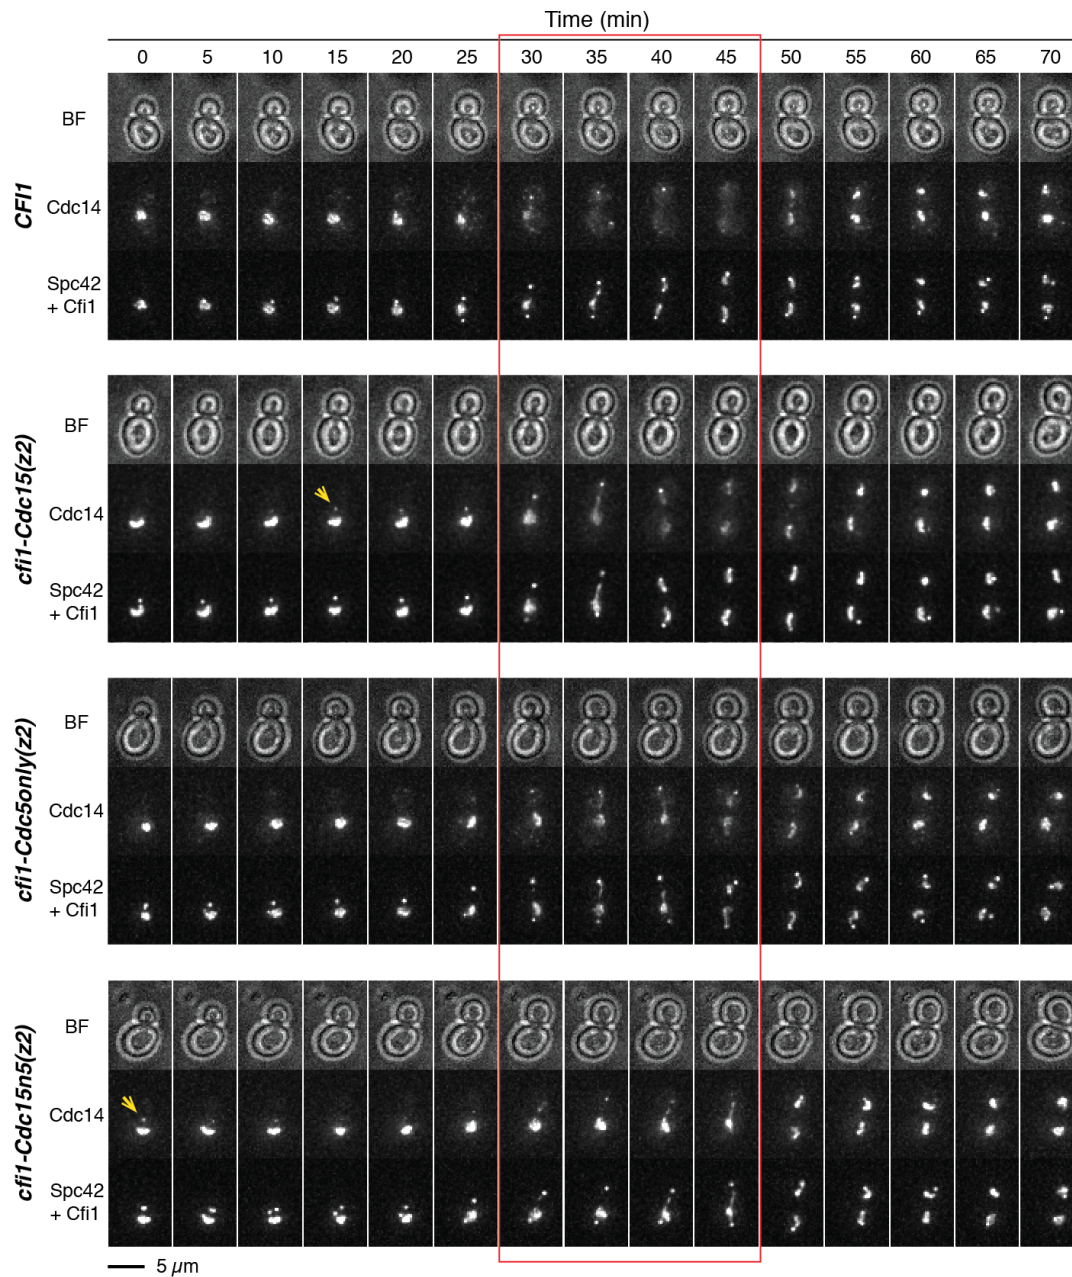

**Figure S13. The MEN and CDC5 promote release of Cdc14 from the nucleolus by phosphorylating Cfi1/Net1, Related to Figure 6**

Representative images showing Cdc14 nucleolar release kinetics for cells harboring wild-type *CFII/NET1* (A41387) or *CFII/NET1* phospho-mutants for Cdc15 sites (A41587), Cdc5 sites (A441588), and Cdc15&Cdc5 sites (A41589). Red box highlights anaphase when Cdc14 is fully released in WT cells. Yellow arrows highlight localization of Cdc14 at dSPB prior to anaphase.

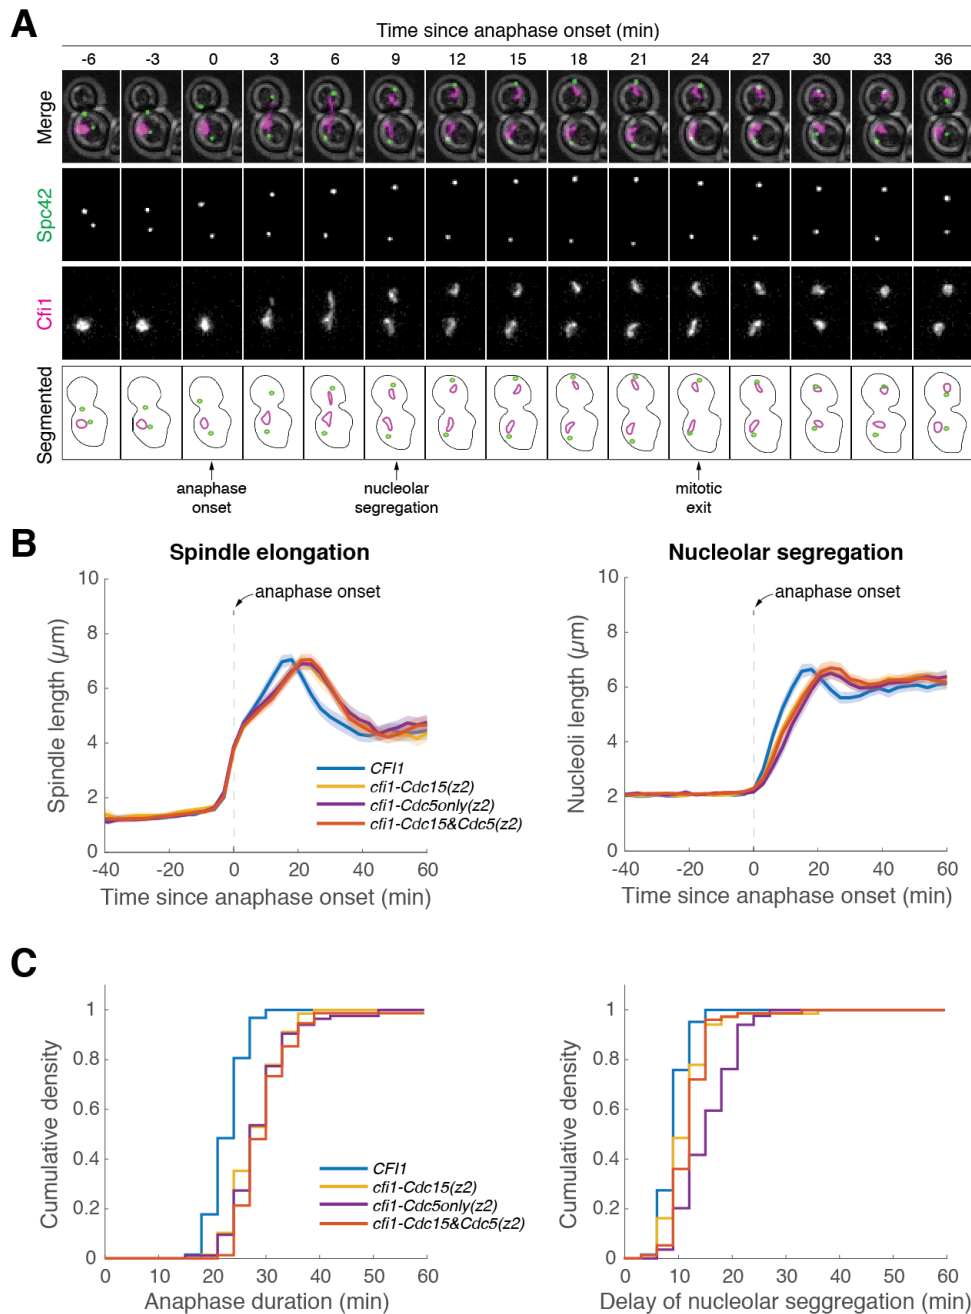

**Figure S14. Cfi1/Net1 phospho-mutants delay mitotic exit and nucleolar segregation, Related to Figure 6**

(A) Tracking anaphase progression and nucleolar segregation using Spc42-eGFP and Cfi1/Net1-mScarlet-I as markers, respectively. A41436 cells were grown at 25°C in SC medium + 2% glucose and imaged every 3 minutes for 4 hours.

(B) Quantification of spindle elongation (spindle length was estimated by measuring the distance between the two SPBs) and nucleolar segregation (nucleoli length was estimated by measuring

the length of the major axis of the nucleolar mass) for *CFII/NET1* mutants using the SPB marker Spc42-eGFP and the nucleolar marker Cfi1/Net1-mScarlet-I (A41436, A41590, A41591 and A41592; same dataset as in Fig. 6C). Single cell traces were aligned to anaphase onset (spindle length  $> 3 \mu\text{m}$ ) and averaged. Solid lines represent the average. Shaded areas represent 95% confidence intervals.

(C) Cumulative density of anaphase duration (left) and delay of nucleolar segregation (right) for cells in (B). Anaphase duration was defined as the time from anaphase onset (spindle length  $> 3 \mu\text{m}$ ) to mitotic exit (spindle breakdown, determined as relaxation of the distance between SPBs). Delay of nucleolar segregation was defined as the time of nucleolar segregation (clear separation of two nucleolar masses) relative to anaphase onset.

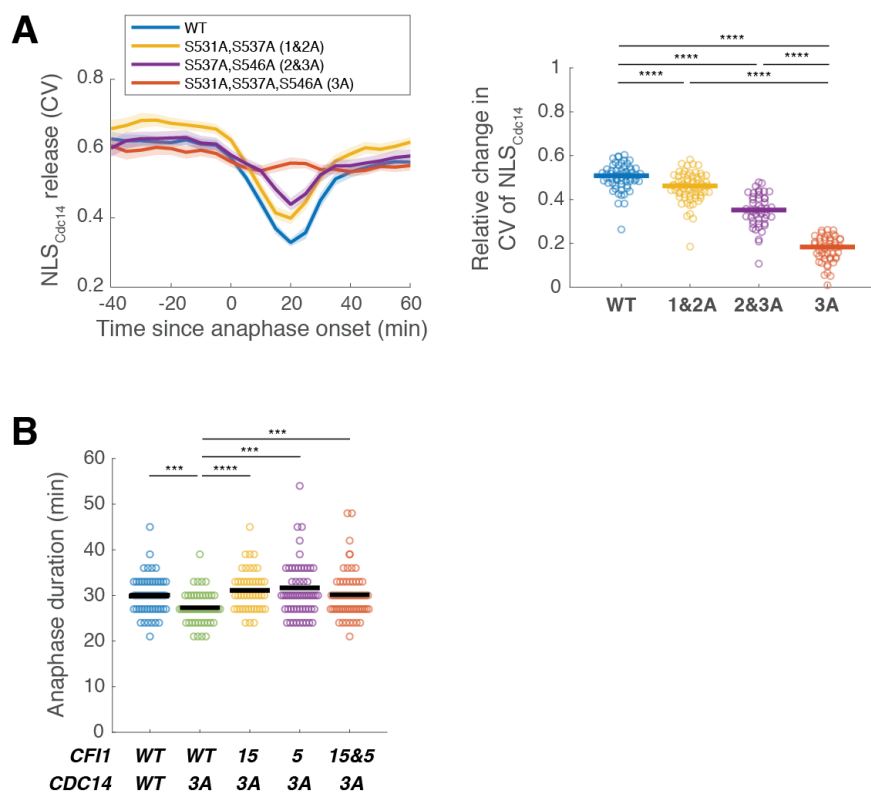

**Figure S15. Phosphorylation of the Cdc14 NLS delays mitotic exit, Related to Figure 6**

(A) Profiles (left) and relative degrees (right) of nuclear release of wild-type (A41584,  $n = 69$  cells) and mutant NLS<sub>Cdc14</sub> reporters where all three potential Dbf2-Mob1 (MEN) target sites (A41585,  $n = 59$  cells) or only two out of three sites (A41586 and A41623,  $n = 77$  and 55 cells) were mutated to alanine. Cells were grown at 25°C in SC medium + 2% glucose and imaged every 5 minutes for 4 hours. Solid lines (right) represent the median.

(B) Distribution of anaphase duration for different *CFII/NET1* phospho-mutants in combination with *CDC14* phospho-mutants measured using the SPB marker Spc42-eGFP (A41603, A41604, A41605, A41606 and A41607;  $n = 59, 62, 50, 67$  and 70 cells, respectively). Cells were grown at 25°C in SC medium + 2% glucose and imaged every 3 minutes for 4 hours. Anaphase duration was defined as the time from anaphase onset (spindle length > 3 μm) to mitotic exit (spindle breakdown). Solid lines represent the mean. \*\*\*\* $P < 0.0001$ ; \*\*\* $P < 0.001$  by two-sided Wilcoxon rank sum test.

**Table S1. Yeast strains used in this study**

| Strain | Relevant Genotype                                                                                                                                                                               |
|--------|-------------------------------------------------------------------------------------------------------------------------------------------------------------------------------------------------|
| A2587  | <i>MATa, ade2-1, leu2-3, ura3, trp1-1, his3-11,15, can1-100, GAL, psi+</i> (wild- type W303)                                                                                                    |
| A2588  | <i>MATalpha</i>                                                                                                                                                                                 |
| A1638  | <i>CFII-3MYC</i>                                                                                                                                                                                |
| A10991 | <i>MATa, cdc15::cdc15-as1(L99G)::URA3</i>                                                                                                                                                       |
| A11869 | <i>NUD1-13MYC::KanMx6</i>                                                                                                                                                                       |
| A32629 | <i>MATa, dbf2::HIS3, CDC14::TAB6-1::TRP1</i>                                                                                                                                                    |
| A34515 | <i>MATalpha, CDC14-eGFP::HIS3</i>                                                                                                                                                               |
| A39695 | <i>MATa, ADE2, MOB1-eGFP::KanMx6, SPC42-mCherry:KanMx6, ura3::pRS306-mCherry-TUB1::URA3</i>                                                                                                     |
| A39893 | <i>MATa, ADE2, MOB1-eGFP::KanMX6, ura3::pADHI-NLS<sub>Cdc14</sub>-TagRFP::URA3</i>                                                                                                              |
| A39931 | <i>MATa, GFP-MOB1-URA3::mob1::HIS3, CFII-mCherry::KAN</i>                                                                                                                                       |
| A39933 | <i>MATa, GFP-mob1aa79-314-URA3::mob1::HIS3, CFII-mCherry::KAN</i>                                                                                                                               |
| A39935 | <i>MATa, GFP-mob1aa133-314-URA3::mob1::HIS3, CFII-mCherry::KAN</i>                                                                                                                              |
| A40257 | <i>MATa, ADE2, MOB1-eGFP::KanMX6, CFII-mCherry::KAN, SPC42-mCherry:KanMx6, trp1::pTEF1-NLS<sub>Cdc14</sub>-ymiRFP670::TRP1</i>                                                                  |
| A40258 | <i>MATa, ADE2, leu2::PhyB-mCherry-SIK1::LEU2, CDC15-eGFP-PIF::NatMX6</i>                                                                                                                        |
| A40260 | <i>MATa, ADE2, leu2::PhyB-mCherry-SIK1::LEU2, MOB1-eGFP-PIF::NatMX6</i>                                                                                                                         |
| A40262 | <i>MATa, ADE2, leu2::PhyB-mCherry-SIK1::LEU2, DBF2-eGFP-PIF::NatMX6</i>                                                                                                                         |
| A40346 | <i>MATa, ADE2, leu2::PhyB-mCherry-Spc72::LEU2, MOB1-eGFP-PIF::NatMX6</i>                                                                                                                        |
| A40354 | <i>MATa, ADE2, leu2::PhyB-mCherry-Tom7::LEU2, MOB1-eGFP-PIF::NatMX6</i>                                                                                                                         |
| A40903 | <i>MATa, cdc5::cdc5-as1(L158G)</i>                                                                                                                                                              |
| A41211 | <i>MATa, ADE2, mob1::eGFP-MOB1::hphNT1, SPC42-mCherry:KanMx6, trp1::pTEF1-NLS<sub>Cdc14</sub>-ymiRFP670::TRP1, CFII-mCherry::KAN</i>                                                            |
| A41212 | <i>MATa, ADE2, mob1::eGFP-mob1aa79-314::hphNT1, SPC42-mCherry:KanMx6, trp1::pTEF1-NLS<sub>Cdc14</sub>-ymiRFP670::TRP1, CFII-mCherry::KAN</i>                                                    |
| A41213 | <i>MATa, ADE2, mob1::eGFP-mob1aa133-314::hphNT1, SPC42-mCherry:KanMx6, trp1::pTEF1-NLS<sub>Cdc14</sub>-ymiRFP670::TRP1, CFII-mCherry::KAN</i>                                                   |
| A41214 | <i>MATa, ADE2, mob1::eGFP-MOB1::hphNT1, SPC42-mCherry:KanMx6, trp1::pTEF1-NLS<sub>Cdc14</sub>-ymiRFP670::TRP1, CFII-mCherry::KAN, cdc15::cdc15-as1(L99G)::URA3</i>                              |
| A41215 | <i>MATa, ADE2, mob1::eGFP-mob1aa79-314::hphNT1, SPC42-mCherry:KanMx6, trp1::pTEF1-NLS<sub>Cdc14</sub>-ymiRFP670::TRP1, CFII-mCherry::KAN, cdc15::cdc15-as1(L99G)::URA3</i>                      |
| A41216 | <i>MATa, ADE2, mob1::eGFP-mob1aa133-314::hphNT1, SPC42-mCherry:KanMx6, trp1::pTEF1-NLS<sub>Cdc14</sub>-ymiRFP670::TRP1, CFII-mCherry::KAN, cdc15::cdc15-as1(L99G)::URA3</i>                     |
| A41334 | <i>MATa, ADE2, mob1::eGFP-MOB1::hphNT1, SPC42-mCherry:KanMx6, trp1::pTEF1-NLS<sub>Cdc14</sub>-ymiRFP670::TRP1, CFII-mCherry::KAN, cdc5::cdc5-as1(L158G)</i>                                     |
| A41335 | <i>MATa, ADE2, mob1::eGFP-mob1aa79-314::hphNT1, SPC42-mCherry:KanMx6, trp1::pTEF1-NLS<sub>Cdc14</sub>-ymiRFP670::TRP1, CFII-mCherry::KAN, cdc5::cdc5-as1(L158G)</i>                             |
| A41336 | <i>MATa, ADE2, mob1::eGFP-mob1aa133-314::hphNT1, SPC42-mCherry:KanMx6, trp1::pTEF1-NLS<sub>Cdc14</sub>-ymiRFP670::TRP1, CFII-mCherry::KAN, cdc5::cdc5-as1(L158G)</i>                            |
| A41337 | <i>MATa, ADE2, mob1::eGFP-MOB1::hphNT1, SPC42-mCherry:KanMx6, trp1::pTEF1-NLS<sub>Cdc14</sub>-ymiRFP670::TRP1, CFII-mCherry::KAN, ura3::GAL-CDC15(aa1-750)-3HA::URA3, cdc5::cdc5-as1(L158G)</i> |



- A41338 *MATa, ADE2, mob1::eGFP-mob1aa79-314::hphNT1, SPC42-mCherry:NatMx6, trp1::pTEF1-NLS<sub>Cdc14</sub>-ymiRFP670::TRP1, CFII-mCherry::KAN, ura3::GAL-CDC15(aa1-750)-3HA::URA3, cdc5::cdc5-as1 (L158G)*
- A41339 *MATa, ADE2, mob1::eGFP-mob1aa133-314::hphNT1, SPC42-mCherry:NatMx6, trp1::pTEF1-NLS<sub>Cdc14</sub>-ymiRFP670::TRP1, CFII-mCherry::KAN, ura3::GAL-CDC15(aa1-750)-3HA::URA3, cdc5::cdc5-as1 (L158G)*
- A41340 *MATa, ADE2, mob1::eGFP-MOB1::hphNT1, SPC42-mCherry:NatMx6, trp1::pTEF1-NLS<sub>Cdc14</sub>-ymiRFP670::TRP1, FOB1-2xmScarlet-I::LEU2, GAL-3HA-CFII::URA3 (YIplac211)*
- A41341 *MATa, ADE2, mob1::eGFP-mob1aa79-314::hphNT1, SPC42-mCherry:NatMx6, trp1::pTEF1-NLS<sub>Cdc14</sub>-ymiRFP670::TRP1, FOB1-2xmScarlet-I::LEU2, GAL-3HA-CFII::URA3 (YIplac211)*
- A41342 *MATa, ADE2, mob1::eGFP-mob1aa133-314::hphNT1, SPC42-mCherry:NatMx6, trp1::pTEF1-NLS<sub>Cdc14</sub>-ymiRFP670::TRP1, FOB1-2xmScarlet-I::LEU2, GAL-3HA-CFII::URA3 (YIplac211)*
- A41343 *MATa, ADE2, mob1::eGFP-MOB1::hphNT1, SPC42-mCherry:NatMx6, trp1::pTEF1-NLS<sub>Cdc14</sub>-ymiRFP670::TRP1, FOB1-2xmScarlet-I::LEU2*
- A41344 *MATa, ADE2, mob1::eGFP-mob1aa79-314::hphNT1, SPC42-mCherry:NatMx6, trp1::pTEF1-NLS<sub>Cdc14</sub>-ymiRFP670::TRP1, FOB1-2xmScarlet-I::LEU2*
- A41345 *MATa, ADE2, mob1::eGFP-mob1aa133-314::hphNT1, SPC42-mCherry:NatMx6, trp1::pTEF1-NLS<sub>Cdc14</sub>-ymiRFP670::TRP1, FOB1-2xmScarlet-I::LEU2*
- A41346 *MATa, ADE2, mob1::eGFP-MOB1::hphNT1, SPC42-mCherry:NatMx6, trp1::pTEF1-NLS<sub>Cdc14</sub>-ymiRFP670::TRP1, FOB1-2xmScarlet-I::LEU2, cfi1::URA3*
- A41347 *MATa, ADE2, mob1::eGFP-mob1aa79-314::hphNT1, SPC42-mCherry:NatMx6, trp1::pTEF1-NLS<sub>Cdc14</sub>-ymiRFP670::TRP1, FOB1-2xmScarlet-I::LEU2, cfi1::URA3*
- A41348 *MATa, ADE2, mob1::eGFP-mob1aa133-314::hphNT1, SPC42-mCherry:NatMx6, trp1::pTEF1-NLS<sub>Cdc14</sub>-ymiRFP670::TRP1, FOB1-2xmScarlet-I::LEU2, cfi1::URA3*
- A41349 *MATalpha, ADE2, crm1::KAN, pDC-crm1T539C(LEU2/CEN), MOB1-eGFP::KanMX6, ura3::pADH1-NLS<sub>Cdc14</sub>-TagRFP::URA3*
- A41350 *MATa, ADE2, mob1::pGPD-yeGFP-MOB1::NatMX6*
- A41351 *MATa, ADE2, mob1::eGFP-MOB1::hphNT1*
- A41352 *MATa, ADE2, mob1::eGFP-mob1aa79-314::hphNT1*
- A41353 *MATa, ADE2, mob1::eGFP-mob1aa133-314::hphNT1*
- A41354 *MATalpha, ADE2, mob1::mob1aa79-314::hphNT1*
- A41355 *MATa, ADE2, mob1::eGFP-mob1aa79-314::hphNT1, SPC42-mCherry:NatMx6, trp1::pTEF1-NLS<sub>Cdc14</sub>-ymiRFP670::TRP1, CFII-mCherry::KAN, cdc14-3*
- A41356 *MATa, ADE2, mob1::eGFP-mob1aa133-314::hphNT1, SPC42-mCherry:NatMx6, trp1::pTEF1-NLS<sub>Cdc14</sub>-ymiRFP670::TRP1, CFII-mCherry::KAN, cdc14-3*
- A41357 *MATa, ADE2, mob1::eGFP-MOB1::hphNT1, SPC42-mCherry:NatMx6, trp1::pTEF1-NLS<sub>Cdc14</sub>-ymiRFP670::TRP1, CFII-mCherry::KAN, slk19::HIS3*
- A41358 *MATa, ADE2, mob1::eGFP-mob1aa79-314::hphNT1, SPC42-mCherry:NatMx6, trp1::pTEF1-NLS<sub>Cdc14</sub>-ymiRFP670::TRP1, CFII-mCherry::KAN, slk19::HIS3*
- A41359 *MATa, mob1::eGFP-mob1aa133-314::hphNT1, SPC42-mCherry:NatMx6, trp1::pTEF1-NLS<sub>Cdc14</sub>-ymiRFP670::TRP1, CFII-mCherry::KAN, slk19::HIS3*
- A41360 *MATa, ADE2, leu2::PhyB-mCherry-SIK1::LEU2, SPC42-mCherry:NatMx6, MOB1-eGFP-PIF::NatMX6*
- A41361 *MATa, leu2::PhyB-mCherry-SIK1::LEU2, SPC42-mCherry:NatMx6, MOB1-eGFP-PIF::NatMX6, cdc15-2*
- A41362 *MATa/alpha, CFII/cfi1::KanMx6*
- A41363 *MATa, ADE2, leu2::GAL-MOB1-eGFP::LEU2, trp1::GAL-DBF2::TRP1*



A41364 *MATa, ADE2, leu2::GAL-MOB1-eGFP::LEU2*  
A41365 *MATa, leu2::PhyB-mCherry-SIK1::LEU2, SPC42-mCherry: NatMx6, mob1::Mob1aa79-314-eGFP-PIF::NatMX6::hphNT1, cdc15-2*  
A41366 *MATa, ADE2, leu2::PhyB-mCherry-SIK1::LEU2, SPC42-mCherry: NatMx6, mob1::mob1aa79-314-eGFP-PIF::NatMX6::hphNT1*  
A41367 *MATalpha, MOB1-TurboID-V5::NatMx6*  
A41368 *MATalpha, TEM1-TurboID-V5::NatMx6*  
A41369 *MATalpha, CDC15-TurboID-V5::NatMx6*  
A41370 *MATalpha, DBF2-TurboID-V5::NatMx6*  
A41371 *MATalpha, ADE2, mob1::mob1aa79-314-TurboID-V5::NatMx6::hphNT1*  
A41372 *MATa, CFII-3MYC, mob1::Mob1-TurboID-V5::NatMx6*  
A41373 *MATa, ADE2, mob1::eGFP-MOB1::hphNT1, SPC42-mCherry: NatMx6, trp1::pTEF1-NLS<sub>Cdc14</sub>-ymiRFP670::TRP1, CFII-mCherry::KAN, crm1::KAN, pDC-crm1T539C(LEU2/CEN)*  
A41374 *MATalpha, mob1::eGFP-mob1aa79-314::hphNT1, SPC42-mCherry: NatMx6, trp1::pTEF1-NLS<sub>Cdc14</sub>-ymiRFP670::TRP1, CFII-mCherry::KAN, crm1::KAN, pDC-crm1T539C(LEU2/CEN)*  
A41375 *MATalpha, ADE2, mob1::eGFP-mob1aa133-314::hphNT1, SPC42-mCherry: NatMx6, trp1::pTEF1-NLS<sub>Cdc14</sub>-ymiRFP670::TRP1, CFII-mCherry::KAN, crm1::KAN, pDC-crm1T539C(LEU2/CEN)*  
A41376 *MATa, ADE2, mob1::eGFP-MOB1::hphNT1, SPC42-mCherry: NatMx6, trp1::pTEF1-NLS<sub>Cdc14</sub>-ymiRFP670::TRP1, CFII-mCherry::KAN, ura3::GAL-CDC15(aa1-750)-3HA::URA3*  
A41377 *MATa, ADE2, mob1::eGFP-mob1aa79-314::hphNT1, SPC42-mCherry: NatMx6, trp1::pTEF1-NLS<sub>Cdc14</sub>-ymiRFP670::TRP1, CFII-mCherry::KAN, ura3::GAL-CDC15(aa1-750)-3HA::URA3*  
A41378 *MATa, ADE2, mob1::eGFP-mob1aa133-314::hphNT1, SPC42-mCherry: NatMx6, trp1::pTEF1-NLS<sub>Cdc14</sub>-ymiRFP670::TRP1, CFII-mCherry::KAN, ura3::GAL-CDC15(aa1-750)-3HA::URA3*  
A41379 *MATa, MOB1-TurboID-V5::NatMx6*  
A41380 *MATa, NUD1-13MYC::KanMX6, MOB1-TurboID-V5::NatMx6*  
A41381 *MATa, NUD1-13MYC::KanMX6, TEM1-TurboID-V5::NatMx6*  
A41382 *MATa, NUD1-13MYC::KanMX6, CDC15-TurboID-V5::NatMx6*  
A41383 *MATa, trp1::GAL-DBF2-eGFP::His3MX6::TRP1, crm1::KAN, pDC-crm1T539C(LEU2/CEN)*  
A41384 *MATa, trp1::GAL-DBF2-eGFP::His3MX6::TRP1*  
A41385 *MATalpha, CDC5-TurboID-V5::NatMx6*  
A41386 *MATa, trp1::GAL-dbf2-HyA-eGFP::TRP1*  
A41387 *MATa, cfi1::KanMx6, leu2::CFII-mScarlet-I::LEU2, SPC42-mScarlet-I::LEU2, trp1::pTEF1-NLS<sub>Cdc14</sub>-ymiRFP670::TRP1, CDC14-eGFP::HIS3*  
A41388 *MATa, trp1::GAL-eGFP::TRP1, ura3::pRS306-pCTS1-2xmCherry-SV40NLS::URA3*  
A41389 *MATa, trp1::GAL-DBF2-eGFP::TRP1, ura3::pRS306-pCTS1-2xmCherry-SV40NLS::URA3*  
A41390 *MATa, trp1::GAL-dbf2-L12M-eGFP::TRP1, ura3::pRS306-pCTS1-2xmCherry-SV40NLS::URA3*  
A41391 *MATa, trp1::GAL-dbf2-L12A-eGFP::TRP1, ura3::pRS306-pCTS1-2xmCherry-SV40NLS::URA3*  
A41392 *MATa, trp1::GAL-dbf2aa1-23-eGFP::TRP1, ura3::pRS306-pCTS1-2xmCherry-SV40NLS::URA3*

- A41393 *MATa, trp1::GAL-dbf2-12del-eGFP::TRP1, ura3::pRS306-pCTS1-2xmCherry-SV40NLS::URA3*
- A41394 *MATa, ADE2, mob1::eGFP-MOB1::hphNT1, SPC42-mCherry:NatMx6, trp1::pTEF1-NLS<sub>Cdc14</sub>-ymiRFP670::TRP1, CFII-mCherry::KAN, dbf2::dbf2-L12A*
- A41395 *MATa, ADE2, mob1::eGFP-mob1aa79-314::hphNT1, SPC42-mCherry:NatMx6, trp1::pTEF1-NLS<sub>Cdc14</sub>-ymiRFP670::TRP1, CFII-mCherry::KAN, dbf2::dbf2-L12A*
- A41396 *MATalpha, ADE2, mob1::eGFP-mob1aa133-314::hphNT1, SPC42-mCherry:NatMx6, trp1::pTEF1-NLS<sub>Cdc14</sub>-ymiRFP670::TRP1, CFII-mCherry::KAN, dbf2::dbf2-L12A*
- A41397 *MATa, cfi1::KanMx6, leu2::cfi1-91A(z3&4)-mScarlet-I::LEU2, SPC42-mScarlet-I::LEU2, trp1::pTEF1-NLS<sub>Cdc14</sub>-ymiRFP670::TRP1, CDC14-eGFP::HIS3*
- A41398 *MATa, cfi1::KanMx6, leu2::cfi1-91A(z1)-mScarlet-I::LEU2, SPC42-mScarlet-I::LEU2, trp1::pTEF1-NLS<sub>Cdc14</sub>-ymiRFP670::TRP1, CDC14-eGFP::HIS3*
- A41399 *MATa, cfi1::KanMx6, leu2::cfi1-91A(z2)-mScarlet-I::LEU2, SPC42-mScarlet-I::LEU2, trp1::pTEF1-NLS<sub>Cdc14</sub>-ymiRFP670::TRP1, CDC14-eGFP::HIS3*
- A41400 *MATa, cfi1::KanMx6, leu2::cfi1-91A(z3)-mScarlet-I::LEU2, SPC42-mScarlet-I::LEU2, trp1::pTEF1-NLS<sub>Cdc14</sub>-ymiRFP670::TRP1, CDC14-eGFP::HIS3*
- A41401 *MATa, cfi1::KanMx6, leu2::cfi1-91A(z4)-mScarlet-I::LEU2, SPC42-mScarlet-I::LEU2, trp1::pTEF1-NLS<sub>Cdc14</sub>-ymiRFP670::TRP1, CDC14-eGFP::HIS3*
- A41402 *MATa, cfi1::KanMx6, leu2::cfi1-91A(z2&4)-mScarlet-I::LEU2, SPC42-mScarlet-I::LEU2, trp1::pTEF1-NLS<sub>Cdc14</sub>-ymiRFP670::TRP1, CDC14-eGFP::HIS3*
- A41403 *MATa, cfi1::KanMx6, leu2::cfi1-91A(z1&3)-mScarlet-I::LEU2, SPC42-mScarlet-I::LEU2, trp1::pTEF1-NLS<sub>Cdc14</sub>-ymiRFP670::TRP1, CDC14-eGFP::HIS3*
- A41404 *MATa, cfi1::KanMx6, leu2::cfi1-91A-mScarlet-I::LEU2, SPC42-mScarlet-I::LEU2, trp1::pTEF1-NLS<sub>Cdc14</sub>-ymiRFP670::TRP1, CDC14-eGFP::HIS3*
- A41405 *MATa, cfi1::KanMx6, leu2::cfi1-91A(z1&2)-mScarlet-I::LEU2, SPC42-mScarlet-I::LEU2, trp1::pTEF1-NLS<sub>Cdc14</sub>-ymiRFP670::TRP1, CDC14-eGFP::HIS3*
- A41406 *MATa, CFII-3MYC, TEM1-TurboID-V5::NatMx6*
- A41407 *MATa, CFII-3MYC, CDC15-TurboID-V5::NatMx6*
- A41408 *MATa, cfi1::KanMx6, leu2::CFII-mScarlet-I::LEU2, SPC42-mScarlet-I::LEU2, trp1::pTEF1-NLS<sub>Cdc14</sub>-ymiRFP670::TRP1, CDC14-eGFP::HIS3, cdc15::cdc15-as1(L99G)::URA3*
- A41409 *MATa cfi1::KanMx6, leu2::CFII-mScarlet-I::LEU2, SPC42-mScarlet-I::LEU2, trp1::pTEF1-NLS<sub>Cdc14</sub>-ymiRFP670::TRP1, CDC14-eGFP::HIS3, cdc5::cdc5-as1(L158G)*
- A41410 *MATa, cfi1::KanMx6, leu2::CFII-mScarlet-I::LEU2, SPC42-mScarlet-I::LEU2, trp1::pTEF1-NLS<sub>Cdc14</sub>-ymiRFP670::TRP1, CDC14-eGFP::HIS3, slk19::HIS3*
- A41411 *MATa, ADE2, cfi1::KanMx6, leu2::CFII-mScarlet-I::LEU2, mob1::eGFP-mob1aa133-314::hphNT1, SPC42-mCherry:NatMx6, trp1::pTEF1-NLS<sub>Cdc14</sub>-ymiRFP670::TRP1*
- A41412 *MATa, ADE2, cfi1::KanMx6, leu2::cfi1-91A-mScarlet-I::LEU2, mob1::eGFP-mob1aa133-314::hphNT1, SPC42-mCherry:NatMx6, trp1::pTEF1-NLS<sub>Cdc14</sub>-ymiRFP670::TRP1*
- A41413 *MATa, ADE2, cfi1::KanMx6, leu2::cfi1-91A(z1&3)-mScarlet-I::LEU2, mob1::eGFP-mob1aa133-314::hphNT1, SPC42-mCherry:NatMx6, trp1::pTEF1-NLS<sub>Cdc14</sub>-ymiRFP670::TRP1*
- A41418 *MATa, CFII-3MYC, CDC5-TurboID-V5::NatMx6*
- A41420 *MATa, cfi1::KanMx6, leu2::cfi1-6Cdk-mScarlet-I::LEU2, SPC42-mScarlet-I::LEU2, trp1::pTEF1-NLS<sub>Cdc14</sub>-ymiRFP670::TRP1, CDC14-eGFP::HIS3*
- A41424 *MATa, cdc15-2, mob1::eGFP-MOB1::hphNT1*
- A41425 *MATa, cdc15-2, mob1::eGFP-mob1aa79-314::hphNT1*
- A41426 *MATa, cdc15-2, mob1::eGFP-mob1aa133-314::hphNT1*

A41427 *MATa, cdc15-2, mob1::PGPD-yeGFP-MOB1::NatMX6*  
A41428 *MATa, tem1-3, mob1::pGPD-yeGFP-MOB1::NatMX6*  
A41429 *MATa, tem1-3, mob1::eGFP-MOB1::hphNT1*  
A41430 *MATa, tem1-3, mob1::eGFP-mob1aa79-314::hphNT1*  
A41431 *MATa, tem1-3, mob1::eGFP-mob1aa133-314::hphNT1*  
A41432 *MATa, cdc5-1, mob1::eGFP-MOB1::hphNT1*  
A41433 *MATa, cdc5-1, mob1::eGFP-mob1aa79-314::hphNT1*  
A41434 *MATa, cdc5-1, mob1::eGFP-mob1aa133-314::hphNT1*  
A41435 *MATa, cdc5-1, mob1::pGPD-yeGFP-MOB1::NatMX6*  
A41436 *MATa, cfi1::KanMx6, leu2::CFII-mScarlet-I::LEU2, SPC42-GFP::TRP1*  
A41440 *MATa, trp1::GAL-dbf2(S17A,S20A)-eGFP::TRP1, ura3::pRS306-pCTS1-2xmCherry-SV40NLS::URA3*  
A41441 *MATa, trp1::GAL-dbf2(S17D,S20D)-eGFP::TRP1, ura3::pRS306-pCTS1-2xmCherry-SV40NLS::URA3*  
A41442 *MATa, trp1::GAL-dbf2(S17E,S20E)-eGFP::TRP1, ura3::pRS306-pCTS1-2xmCherry-SV40NLS::URA3*  
A41584 *MATalpha, ADE2, ura3::pADHI-NLS<sub>Cdc14</sub>-GFP::URA3, SPC42-mScarlet-I::LEU2, trp1::pTEF1-NLS<sub>Cdc14</sub>-ymiRFP670::TRP1*  
A41585 *MATalpha, ADE2, ura3::pADHI-NLS<sub>Cdc14</sub>(S531A,S537A,S546A)-GFP::URA3, SPC42-mScarlet-I::LEU2, trp1::pTEF1-NLS<sub>Cdc14</sub>-ymiRFP670::TRP1*  
A41586 *MATalpha, ADE2, ura3::pADHI-NLS<sub>Cdc14</sub>(S531A,S537A)-GFP::URA3, SPC42-mScarlet-I::LEU2, trp1::pTEF1-NLS<sub>Cdc14</sub>-ymiRFP670::TRP1*  
A41587 *MATa, cfi1::KanMx6, leu2::cfi1-Cdc15(z2)-mScarlet-I::LEU2, SPC42-mScarlet-I::LEU2, trp1::pTEF1-NLS<sub>Cdc14</sub>-ymiRFP670, CDC14-eGFP::HIS3*  
A41588 *MATa, cfi1::KanMx6, leu2::cfi1-Cdc5only(z2)-mScarlet-I::LEU2, SPC42-mScarlet-I::LEU2, trp1::pTEF1-NLS<sub>Cdc14</sub>-ymiRFP670, CDC14-eGFP::HIS3*  
A41589 *MATa, cfi1::KanMx6, leu2::cfi1-Cdc15&5(z2)-mScarlet-I::LEU2, SPC42-mScarlet-I::LEU2, trp1::pTEF1-NLS<sub>Cdc14</sub>-ymiRFP670, CDC14-eGFP::HIS3*  
A41590 *MATa, cfi1::KanMx6, leu2::cfi1-Cdc15(z2)-mScarlet-I::LEU2, SPC42-GFP::TRP1*  
A41591 *MATa, cfi1::KanMx6, leu2::cfi1-Cdc5only(z2)-mScarlet-I::LEU2, SPC42-GFP::TRP1*  
A41592 *MATa, cfi1::KanMx6, leu2::cfi1-Cdc15&5(z2)-mScarlet-I::LEU2, SPC42-GFP::TRP1*  
A41593 *MATa, ADE2, mob1::eGFP-mob1aa133-314::hphNT1, SPC42-mCherry:NatMx6, trp1::pTEF1-NLS<sub>Cdc14</sub>-ymiRFP670::TRP1, cfi1::KanMx6, leu2::cfi1-Cdc15(z2)-mScarlet-I::LEU2*  
A41594 *MATa, ADE2, mob1::eGFP-mob1aa133-314::hphNT1, SPC42-mCherry:NatMx6, trp1::pTEF1-NLS<sub>Cdc14</sub>-ymiRFP670::TRP1, cfi1::KanMx6, leu2::cfi1-Cdc5only(z2)-mScarlet-I::LEU2*  
A41595 *MATa, ADE2, mob1::pGPD-yeGFP-MOB1::NatMX6, SPC42-mCherry:NatMx6, trp1::pTEF1-NLS<sub>Cdc14</sub>-ymiRFP670::TRP1, CFII-mCherry::KAN*  
A41596 *MATa, cfi1::KanMx6, leu2::CFII-13MYC::TRP1::LEU2*  
A41597 *MATa, cfi1::KanMx6, leu2:: cfi1-Cdc15(z2)-13MYC::TRP1::LEU2*  
A41598 *MATa, cfi1::KanMx6, leu2:: cfi1-Cdc5only(z2)-13MYC::TRP1::LEU2*  
A41603 *MATa, cfi1::KanMx6, leu2::CFII-mScarlet-I::LEU2, SPC42-GFP::TRP1, CDC14-eGFP::HIS3*  
A41604 *MATa, cfi1::KanMx6, leu2::CFII-mScarlet-I::LEU2, SPC42-GFP::TRP1, cdc14::cdc14(S531A,S537A,S546A)-eGFP::HIS3*  
A41605 *MATa, cfi1::KanMx6, leu2::cfi1-Cdc15(z2)-mScarlet-I::LEU2, SPC42-GFP::TRP1, cdc14::cdc14(S531A,S537A,S546A)-eGFP::HIS3*

- A41606 *MATa, cfi1::KanMx6, leu2::cfi1-Cdc5only(z2)-mScarlet-I::LEU2, SPC42-GFP::TRP1, cdc14::cdc14(S531A,S537A,S546A)-eGFP::HIS3*
- A41607 *MATa, cfi1::KanMx6, leu2::cfi1-Cdc15&5(z2)-mScarlet-I::LEU2, SPC42-GFP::TRP1, cdc14::cdc14(S531A,S537A,S546A)-eGFP::HIS3*
- A41608 *MATa, leu2::PhyB-mCherry-SIK1::LEU2, MOB1-eGFP-PIF::NatMX6, SPC42-mCherry:NatMx6, dbf2::3MYC-DBF2::URA3*
- A41609 *MATa, leu2::PhyB-mCherry-SIK1::LEU2, MOB1-eGFP-PIF::NatMX6, SPC42-mCherry:NatMx6, dbf2::3MYC-dbf2(S17A,S20A)::URA3*
- A41610 *MATa, leu2::PhyB-mCherry-SIK1::LEU2, MOB1-eGFP-PIF::NatMX6, SPC42-mCherry:NatMx6, dbf2::3MYC-dbf2(S17D,S20D)::URA3*
- A41611 *MATa, cfi1::KanMx6, leu2::CFII-13MYC::TRP1::LEU2, MOB1-TurboID-V5::NatMx6*
- A41612 *MATa, cfi1::KanMx6, leu2::cfi1-Cdc15(z2)-13MYC::TRP1::LEU2, MOB1-TurboID-V5::NatMx6*
- A41613 *MATa, cfi1::KanMx6, leu2::cfi1-Cdc5only(z2)-13MYC::TRP1::LEU2, MOB1-TurboID-V5::NatMx6*
- A41614 *MATa, ADE2, mob1::eGFP-MOB1::hphNT1, SPC42-mCherry:NatMx6, trp1::pTEF1-NLS<sub>Cdc14</sub>-ymiRFP670::TRP1, CFII-mCherry::KAN, dbf2::3MYC-DBF2::URA3*
- A41615 *MATa, mob1::eGFP-mob1aa79-314::hphNT1, SPC42-mCherry:NatMx6, trp1::pTEF1-NLS<sub>Cdc14</sub>-ymiRFP670::TRP1, CFII-mCherry::KAN, dbf2::3MYC-DBF2::URA3*
- A41616 *MATa, ADE2, mob1::eGFP-mob1aa133-314::hphNT1, SPC42-mCherry:NatMx6, trp1::pTEF1-NLS<sub>Cdc14</sub>-ymiRFP670::TRP1, CFII-mCherry::KAN, dbf2::3MYC-DBF2::URA3*
- A41617 *MATa, ADE2, mob1::eGFP-MOB1::hphNT1, SPC42-mCherry:NatMx6, trp1::pTEF1-NLS<sub>Cdc14</sub>-ymiRFP670::TRP1, CFII-mCherry::KAN, dbf2::3MYC-dbf2(S17A,S20A)::URA3*
- A41618 *MATa, ADE2, mob1::eGFP-mob1aa79-314::hphNT1, SPC42-mCherry:NatMx6, trp1::pTEF1-NLS<sub>Cdc14</sub>-ymiRFP670::TRP1, CFII-mCherry::KAN, dbf2::3MYC-dbf2(S17A,S20A)::URA3*
- A41619 *MATa, ADE2, mob1::eGFP-mob1aa133-314::hphNT1, SPC42-mCherry:NatMx6, trp1::pTEF1-NLS<sub>Cdc14</sub>-ymiRFP670::TRP1, CFII-mCherry::KAN, dbf2::3MYC-dbf2(S17A,S20A)::URA3*
- A41620 *MATa, ADE2, mob1::eGFP-MOB1::hphNT1, SPC42-mCherry:NatMx6, trp1::pTEF1-NLS<sub>Cdc14</sub>-ymiRFP670::TRP1, CFII-mCherry::KAN, dbf2::3MYC-dbf2(S17D,S20D)::URA3*
- A41621 *MATa, ADE2, mob1::eGFP-mob1aa79-314::hphNT1, SPC42-mCherry:NatMx6, trp1::pTEF1-NLS<sub>Cdc14</sub>-ymiRFP670::TRP1, CFII-mCherry::KAN, dbf2::3MYC-dbf2(S17D,S20D)::URA3*
- A41622 *MATa, ADE2, mob1::eGFP-mob1aa133-314::hphNT1, SPC42-mCherry:NatMx6, trp1::pTEF1-NLS<sub>Cdc14</sub>-ymiRFP670::TRP1, CFII-mCherry::KAN, dbf2::3MYC-dbf2(S17D,S20D)::URA3*
- A41623 *MATalpha, ADE2, ura3::pADHI-NLS<sub>Cdc14</sub>(S537A,S546A)-GFP::URA3, SPC42-mScarlet-I::LEU2, trp1::pTEF1-NLS<sub>Cdc14</sub>-ymiRFP670::TRP1*
- A41624 *MATalpha, cdc15-2, dbf2::3MYC-DBF2::URA3*
- A41625 *MATalpha, cdc15-2, dbf2::3MYC-dbf2(S17A,S20A)::URA3*
- A41626 *MATalpha, cdc15-2, dbf2::3MYC-dbf2(S17D,S20D)::URA3*
- A41645 *MATa, cfi1::KanMx6, leu2::CFII-mScarlet-I::LEU2, slk19::HIS3, pRS316-Cfi1*
- A41646 *MATa, cfi1::KanMx6, leu2::cfi1-Cdc15(z2)-mScarlet-I::LEU2, slk19::HIS3, pRS316-CFII*
- A41647 *MATa, cfi1::KanMx6, leu2::cfi1-Cdc5only(z2)-mScarlet-I::LEU2, slk19::HIS3, pRS316-CFII*



A41648 *MATa, cfi1::KanMx6, leu2::cfi1-Cdc15&Cdc5(z2)-mScarlet-I::LEU2, slk19::HIS3, pRS316-CFII*

A41649 *MATa, cfi1::KanMx6, leu2::cfi1-6Cdk-mScarlet-I::LEU2, slk19::HIS3, pRS316-CFII*

A41650 *MATa, cfi1::KanMx6, leu2::CFII-mScarlet-I::LEU2, spo12::HIS3, pRS316-CFII*

A41651 *MATa, cfi1::KanMx6, leu2::cfi1-Cdc15(z2)-mScarlet-I::LEU2, spo12::HIS3, pRS316-CFII*

A41652 *MATa, cfi1::KanMx6, leu2::cfi1-Cdc5only(z2)-mScarlet-I::LEU2, spo12::HIS3, pRS316-CFII*

A41653 *MATa, cfi1::KanMx6, leu2::cfi1-Cdc15&Cdc5(z2)-mScarlet-I::LEU2, spo12::HIS3, pRS316-CFII*

A41654 *MATa, cfi1::KanMx6, leu2::cfi1-6Cdk-mScarlet-I::LEU2, spo12::HIS3, pRS316-CFII*

**Table S2. Plasmids used in this study**

| Plasmid | Description                                         | Source                                 |
|---------|-----------------------------------------------------|----------------------------------------|
| pA2721  | linker-mCitrine-PIF-NatMx6                          | C. Tang (Addgene #51576)               |
| pA2723  | PhyB-mCherry-Spc72                                  | C. Tang (Addgene #51582)               |
| pA2724  | PhyB-mCherry-Tom7                                   | O. Weiner (Addgene #66571)             |
| pA2808  | PhyB-mCherry-SIK1                                   | C. Tang (Addgene #51577)               |
| pA2727  | p404TEF1                                            | N. Buchler & F. Cross (Addgene #15972) |
| pA2725  | Gal-NLS <sub>Cdc14</sub> -GFP, URA3                 | R. Deshaies                            |
| pA2735  | p406-pADH1-NLS <sub>Cdc14</sub> -GFP                | This study                             |
| pA2786  | p404-pTEF1-NLS <sub>Cdc14</sub> -ymiRFP670          | This study                             |
| pA2821  | linker-eGFP-PIF-NatMx6                              | This study                             |
| pA2621  | pRS305H-Mob1                                        | E. Schiebel                            |
| pA2824  | pRS305H-Mob1aa79-314                                | This study                             |
| pA2828  | pRS305H-eGFP-Mob1                                   | This study                             |
| pA2829  | pRS305H-eGFP-Mob1aa79-314                           | This study                             |
| pA2830  | pRS305H-eGFP-Mob1aa133-314                          | This study                             |
| pA2840  | YIplac211-GAL-Cdc15(1-750)                          | This study                             |
| pA2852  | YIplac128-Gal-Mob1-eGFP                             | This study                             |
| pA2854  | YIplac211-Gal-3HA-Cfi1                              | This study                             |
| pA2847  | pRS415-TurboID-V5                                   | A. Ting (Addgene #107167)              |
| pA2858  | pRS316-Cfi1                                         | This study                             |
| pA2859  | linker-TurboID-V5-NatMx6                            | This study                             |
| pA2868  | pFA6a-Vinnylinker-mScarlet-I-cgLEU2                 | E. Unal                                |
| pA2869  | pFA6a-Vinnylinker-2xmScarlet-I-cgLEU2               | E. Unal                                |
| pA2890  | YIplac204-Gal-eGFP                                  | This study                             |
| pA2891  | YIplac204-Gal-Dbf2-eGFP                             | This study                             |
| pA2892  | YIplac204-Gal-Dbf2-HyA-eGFP                         | This study                             |
| pA2908  | YIplac204-Gal-dbf2-L12M-eGFP                        | This study                             |
| pA2926  | YIplac204-Gal-dbf2-L12A-eGFP                        | This study                             |
| pA2927  | YIplac204-Gal-dbf2aa1-23-eGFP                       | This study                             |
| pA2928  | YIplac204-Gal-dbf2-12del-eGFP                       | This study                             |
| pA2941  | YIplac204-Gal-dbf2-S17,20A-eGFP                     | This study                             |
| pA2942  | YIplac204-Gal-dbf2-S17,20D-eGFP                     | This study                             |
| pA2943  | YIplac204-Gal-dbf2-S17,20E-eGFP                     | This study                             |
| pA2898  | pRS305s-Cfi1-mScarlet                               | This study                             |
| pA2911  | bRA90 pPGK1-Cas9-LEU                                | J. Haber                               |
| pA2948  | pFA6a-3myc-Dbf2-CaURA3                              | This study                             |
| pA2953  | pFA6a-3myc-dbf2-S17,20A-CaURA3                      | This study                             |
| pA2954  | pFA6a-3myc-dbf2-S17,20D-CaURA3                      | This study                             |
| pA2956  | pRS305s-Cfi1-91A-mScarlet                           | This study                             |
| pA2957  | pRS305s-Cfi1-91A(z1)-mScarlet                       | This study                             |
| pA2958  | pRS305s-Cfi1-91A(z2)-mScarlet                       | This study                             |
| pA2959  | pRS305s-Cfi1-91A(z3)-mScarlet                       | This study                             |
| pA2960  | pRS305s-Cfi1-91A(z4)-mScarlet                       | This study                             |
| pA2961  | pRS305s-Cfi1-91A(z1&2)-mScarlet                     | This study                             |
| pA2962  | pRS305s-Cfi1-91A(z3&4)-mScarlet                     | This study                             |
| pA2963  | pRS305s-Cfi1-91A(z1&3)-mScarlet                     | This study                             |
| pA2964  | pRS305s-Cfi1-91A(z2&4)-mScarlet                     | This study                             |
| pA2965  | pRS305s-Cfi1-Cdc15(z2)-mScarlet                     | This study                             |
| pA2966  | pRS305s-Cfi1-Cdc5only(z2)-mScarlet                  | This study                             |
| pA2967  | pRS305s-Cfi1-Cdc15&5(z2)-mScarlet                   | This study                             |
| pA2968  | pRS305s-Cfi1-6Cdk-mScarlet                          | This study                             |
| pA2969  | p406-pADH1-NLS <sub>Cdc14</sub> (S531,537A)-GFP     | This study                             |
| pA2970  | p406-pADH1-NLS <sub>Cdc14</sub> (S537,546A)-GFP     | This study                             |
| pA2971  | p406-pADH1-NLS <sub>Cdc14</sub> (S531,537,546A)-GFP | This study                             |



**Table S3. Summary of TurboID labeling experiments**

Proteins identified in TurboID labeling experiments for MEN proteins (Figure 2A, S3). Proteins listed in Figure 2A are highlighted in green.

| Bait<br>(TurboID tagged) | Hits       | #Total/Unique peptides<br>in tagged sample | #Total/Unique peptides<br>in untagged control |
|--------------------------|------------|--------------------------------------------|-----------------------------------------------|
| Mob1                     | Net1/Cfi1  | 84/37                                      | 0                                             |
|                          | Mob1       | 12/6                                       | 0                                             |
|                          | Dbf20      | 8/5                                        | 0                                             |
|                          | Nud1       | 5/4                                        | 0                                             |
|                          | Dbf2/Dbf20 | 3/2                                        | 0                                             |
|                          | Ctr9       | 3/3                                        | 0                                             |
|                          | Rpn11      | 3/3                                        | 0                                             |
|                          | Bni4       | 3/3                                        | 0                                             |
|                          | Vac7       | 3/3                                        | 0                                             |
|                          | Yck2       | 2/2                                        | 0                                             |
|                          | Ski2       | 2/2                                        | 0                                             |
|                          | Ski3       | 2/2                                        | 0                                             |
|                          | Bud3       | 2/2                                        | 0                                             |
|                          | Hog1       | 2/2                                        | 0                                             |
|                          | Cnm67      | 2/2                                        | 0                                             |
|                          | Sxm1       | 2/2                                        | 0                                             |
|                          | Gsh2       | 2/2                                        | 0                                             |
|                          | Aim21      | 2/2                                        | 0                                             |
|                          | Sac6       | 2/2                                        | 0                                             |
|                          | Alg9       | 2/2                                        | 0                                             |
|                          | Ufd2       | 2/2                                        | 0                                             |
|                          | Arp8       | 2/2                                        | 0                                             |
|                          | Nup157     | 2/2                                        | 0                                             |
|                          | Sec16      | 2/2                                        | 0                                             |
|                          | Tif35      | 2/2                                        | 0                                             |
| Gin4                     | 8/8        | 1                                          |                                               |
| Dbf2                     | 5/3        | 1                                          |                                               |
| Scp160                   | 2/2        | 1                                          |                                               |
| Mob1Δ78                  | Net1/Cfi1  | 70/38                                      | 0                                             |
|                          | Mob1       | 8/3                                        | 0                                             |
|                          | Dbf20      | 7/5                                        | 0                                             |
|                          | Dbf2/Dbf20 | 6/3                                        | 0                                             |
|                          | Dhh1       | 3/3                                        | 0                                             |
|                          | Pre8       | 3/2                                        | 0                                             |
|                          | Ndi1       | 3/3                                        | 0                                             |
|                          | Rsm23      | 2/2                                        | 0                                             |
|                          | Ski2       | 2/2                                        | 0                                             |
|                          | Bud14      | 2/2                                        | 0                                             |
|                          | Npa3       | 2/2                                        | 0                                             |
|                          | Hmf1       | 2/2                                        | 0                                             |
|                          | Frt1       | 2/2                                        | 0                                             |
|                          | YMR027W    | 2/2                                        | 0                                             |
|                          | Tps2       | 2/2                                        | 0                                             |

|         |            |       |     |
|---------|------------|-------|-----|
| Dbf2    | Net1/Cfi1  | 45/29 | 0   |
|         | Spa2       | 5/5   | 0   |
|         | Mob1       | 4/4   | 0   |
|         | Ski2       | 4/4   | 0   |
|         | Bud14      | 4/3   | 0   |
|         | Ssm4       | 3/3   | 0   |
|         | Pop2       | 3/2   | 0   |
|         | Nud1       | 2/2   | 0   |
|         | Dbf2/Dbf20 | 2/2   | 0   |
|         | Aim21      | 2/1   | 0   |
|         | Sec3       | 2/2   | 0   |
|         | Utp6       | 2/1   | 0   |
|         | Tan1       | 2/2   | 0   |
|         | Map1       | 2/1   | 0   |
|         | Apl1       | 2/2   | 0   |
|         | Rrp6       | 2/2   | 0   |
|         | Hxt1       | 2/2   | 0   |
|         | Nup2       | 2/2   | 0   |
|         | Dbf2       | 7/6   | 1   |
|         | Tem1       | Prs1  | 5/5 |
| Cdc28   |            | 5/4   | 0   |
| Ski2    |            | 4/4   | 0   |
| Rpn11   |            | 4/4   | 0   |
| Hog1    |            | 4/4   | 0   |
| Mtr4    |            | 4/4   | 0   |
| Bfa1    |            | 4/4   | 0   |
| Utp6    |            | 3/2   | 0   |
| Paa1    |            | 3/2   | 0   |
| Ski3    |            | 3/3   | 0   |
| Gsh2    |            | 3/3   | 0   |
| Yck1    |            | 3/3   | 0   |
| Atp2    |            | 3/3   | 0   |
| Tyr1    |            | 3/2   | 0   |
| Ndi1    |            | 3/3   | 0   |
| Cat2    |            | 3/3   | 0   |
| Nup133  |            | 3/3   | 0   |
| Utp9    |            | 3/3   | 0   |
| Ipi3    |            | 3/3   | 0   |
| YMR027W |            | 3/3   | 0   |
| Ssm4    |            | 2/2   | 0   |
| Nud1    |            | 2/2   | 0   |
| Sec3    |            | 2/2   | 0   |
| Map1    |            | 2/2   | 0   |
| Rho5    |            | 2/2   | 0   |
| Tma108  |            | 2/2   | 0   |
| Dhh1    |            | 2/2   | 0   |
| Pre10   |            | 2/2   | 0   |
| Msc7    |            | 2/2   | 0   |
| Lsm12   |            | 2/2   | 0   |

|       |         |     |   |
|-------|---------|-----|---|
|       | Ald4    | 2/2 | 0 |
|       | Mot1    | 2/2 | 0 |
|       | Vma6    | 2/2 | 0 |
|       | Nop13   | 2/2 | 0 |
|       | Tps1    | 2/2 | 0 |
|       | Tim44   | 2/2 | 0 |
|       | Trm3    | 2/2 | 0 |
|       | Cms1    | 2/2 | 0 |
|       | Mmn1    | 2/2 | 0 |
|       | Bdh1    | 2/2 | 0 |
|       | YGR283C | 2/2 | 0 |
|       | Scp160  | 5/5 | 1 |
|       | Gin4    | 3/3 | 1 |
|       | Dbf2    | 2/2 | 1 |
| Cdc15 | Prs1    | 8/5 | 0 |
|       | Gsh2    | 5/3 | 0 |
|       | Utp6    | 4/2 | 0 |
|       | Paa1    | 4/2 | 0 |
|       | Nup133  | 4/3 | 0 |
|       | Vma6    | 4/3 | 0 |
|       | Msn5    | 4/4 | 0 |
|       | Mtr4    | 3/2 | 0 |
|       | Ndi1    | 3/3 | 0 |
|       | Utp9    | 3/3 | 0 |
|       | Mcm3    | 3/2 | 0 |
|       | Urk1    | 3/3 | 0 |
|       | Rrp45   | 3/2 | 0 |
|       | Arp8    | 3/3 | 0 |
|       | Syp1    | 3/3 | 0 |
|       | Cdc28   | 2/2 | 0 |
|       | Ski2    | 2/2 | 0 |
|       | Hog1    | 2/2 | 0 |
|       | Yck1    | 2/2 | 0 |
|       | Tyr1    | 2/2 | 0 |
|       | YMR027W | 2/2 | 0 |
|       | Nud1    | 2/2 | 0 |
|       | Msc7    | 2/2 | 0 |
|       | Tps1    | 2/2 | 0 |
|       | Tim44   | 2/2 | 0 |
|       | Yck2    | 2/2 | 0 |
|       | Rvs167  | 2/2 | 0 |
|       | Cct5    | 2/2 | 0 |
|       | Mcm5    | 2/2 | 0 |
|       | Snu114  | 2/2 | 0 |
|       | Dbp7    | 2/2 | 0 |
|       | Nup82   | 2/2 | 0 |
|       | Cnm67   | 2/2 | 0 |
| Dop1  | 2/2     | 0   |   |
| Doa1  | 2/2     | 0   |   |

|      |              |        |     |
|------|--------------|--------|-----|
|      | Pho91        | 2/2    | 0   |
|      | Scp160       | 9/7    | 1   |
|      | Dbf2         | 4/3    | 1   |
| Cdc5 | Net1/Cfi1    | 164/63 | 6/6 |
|      | Boi2         | 21/14  | 0   |
|      | Mps3         | 20/13  | 0   |
|      | YPR174C/Csa1 | 17/7   | 0   |
|      | Pfy1         | 16/4   | 0   |
|      | Prs1         | 11/6   | 0   |
|      | Ycp4         | 10/6   | 0   |
|      | Mtr4         | 9/9    | 0   |
|      | Nip7         | 8/5    | 0   |
|      | Arf2         | 7/2    | 0   |
|      | YMR144W      | 7/5    | 0   |
|      | Gsh2         | 7/7    | 0   |
|      | Rpn13        | 6/3    | 0   |
|      | Rpb9         | 6/3    | 0   |
|      | Rbp8         | 5/3    | 0   |
|      | Cdc11        | 5/3    | 0   |
|      | Nic96        | 5/3    | 0   |
|      | Vtc1         | 5/3    | 0   |
|      | Ipi3         | 5/4    | 0   |
|      | Tof2         | 5/4    | 0   |
| Utp6 | 5/3          | 0      |     |
| Dtd1 | 5/4          | 0      |     |

**Table S4. Phosphorylation of Cfi1/Net1**

Summary of phosphorylation sites in Cfi1/Net1. SGD data was retrieved on 2019-02-06, the numbers represent number of studies reported for each site. CDK sites were extracted from Holt et al. 2009 (denoted as +); green highlight, sites mutated to alanine in *cfi1/net1-6CDK* (Azzam et al. 2004). PP, phospho-proteomics with DIA-MS; ana, anaphase culture; meta, metaphase culture; +, detected or determined as *CDC15/CDC5*-dependent; w, weakly dependent (see methods for criteria); \*, fit Dbf2's phosphorylation motif of RXXS; ^, phosphorylated by Cdc5 *in vitro* (Chen et al. 2002); yellow highlight, mutated to alanine in *cfi1-Cdc15(z2)*; purple highlight, mutated to alanine in *cfi1-Cdc5only(z2)*; A, mutated to alanine in *cfi1-91A*; red highlight, mutated to alanine in *cfi1-Cdc15&5(z2)*.

| Sites | SGD | CDK | IP-MS (ana) | PP (ana) | PP (meta) | Cdc15 (ana) | Cdc5 (ana) | Cdc5 (meta) | <i>cfi1-91A</i> |
|-------|-----|-----|-------------|----------|-----------|-------------|------------|-------------|-----------------|
| S31   |     |     | +           |          |           |             |            |             | A               |
| S43   | 1   |     |             | +        |           |             | +          |             | A               |
| S48   | 1   |     | +           | +        | +         |             | +^         |             | A               |
| Y51   |     |     |             |          | +         |             |            |             |                 |
| S56   |     |     |             | +        |           |             |            |             | A               |
| S60   | 1   |     | +           | +        | +         |             | +^         | +           | A               |
| T62   |     |     |             |          | +         |             |            |             |                 |
| S64   | 1   |     | +           | +        |           |             | +^         |             | A               |
| S69   | 1   |     |             |          | +         |             |            |             | A               |
| S160  | 1   |     | +           |          |           |             |            |             | A               |
| S166  | 4   | +   | +           | +        | +         |             |            |             | A               |
| S169  |     |     | +           | +        |           |             |            |             | A               |
| S178  | 2   |     |             | +        |           | +           | +          |             | A               |
| S179  | 1   |     |             |          |           |             |            |             | A               |
| S180  | 1   |     |             |          |           |             |            |             | A               |
| S207  | 1   |     |             |          |           |             |            |             | A               |
| T212  | 2   |     | +           | +        |           | +           | +          |             | A               |
| S228  | 3   |     |             | +        | +         |             |            |             | A               |
| S231  | 5   |     | +           | +        | +         |             |            |             | A               |
| S242  | 1   |     |             | +        | +         |             | +^         | +           | A               |
| T248  |     |     |             | +        | +         |             |            |             | A               |
| S252  | 4   | +   | +           | +        | +         |             |            |             | A               |
| S259  | 2   |     | +           | +        |           | +           | +          |             | A               |
| S269  | 1   |     | +           | +        |           | +           | +          |             | A               |
| S270  | 1   |     | +           | +        |           | +           | +          |             | A               |
| S278  |     |     |             | +        |           | +           |            |             | A               |
| T282  |     |     | +           |          |           |             |            |             | A               |
| T288  |     |     | +           |          |           |             |            |             | A               |
| S295  | 2   |     | +           | +        | +         | +           | +          |             | A               |

|      |   |   |   |   |   |   |   |   |   |
|------|---|---|---|---|---|---|---|---|---|
| T297 | 2 | + | + | + | + |   |   |   | A |
| S301 |   |   |   | + |   |   |   |   | A |
| T304 | 1 |   | + | + | + |   |   |   | A |
| T311 |   |   | + | + | + |   |   |   | A |
| S317 |   |   |   |   | + |   |   |   |   |
| T356 |   |   |   | + |   |   |   |   | A |
| T357 |   |   | + | + | + |   |   |   | A |
| S362 | 2 |   | + | + |   | + | + |   | A |
| S384 | 2 |   |   | + | + |   | + |   | A |
| S385 | 1 |   | + | + | + |   |   |   | A |
| S388 |   |   |   | + | + |   |   |   | A |
| S412 | 1 |   |   |   |   |   |   |   | A |
| S415 | 1 |   |   |   |   |   |   |   | A |
| S433 | 1 |   |   |   |   |   |   |   | A |
| S437 | 3 |   |   | + | + |   | + | + | A |
| S439 | 3 |   | + | + | + | + | + |   | A |
| S440 | 2 |   | + | + | + |   | + |   | A |
| S447 | 2 | + | + | + | + |   |   |   | A |
| S452 | 1 | + | + | + | + |   |   |   | A |
| S496 |   |   | + |   | + |   |   |   | A |
| S497 | 5 |   | + | + | + | + | + |   | A |
| T500 |   |   |   | + |   |   |   |   | A |
| S511 |   |   | + |   |   |   |   |   | A |
| S557 |   |   |   | + | + |   |   |   | A |
| S558 |   |   |   | + | + |   |   |   | A |
| S561 |   |   | + |   |   |   |   |   | A |
| S567 | 1 |   |   |   |   |   |   |   | A |
| T584 |   |   |   | + |   |   |   |   | A |
| T602 |   |   |   | + | + |   |   |   | A |
| T603 |   |   |   | + | + |   | + | + | A |
| S611 | 3 |   | + | + | + |   |   |   | A |
| S613 | 2 |   |   |   | + |   |   |   | A |
| S614 |   |   |   | + |   |   |   |   | A |
| S615 | 2 |   | + |   | + |   |   |   | A |
| T676 | 4 | + | + | + | + |   |   |   | A |
| S679 | 1 |   |   |   |   |   |   |   | A |
| S734 | 1 |   |   | + | + |   | + |   | A |



|       |   |   |   |   |   |   |   |   |   |
|-------|---|---|---|---|---|---|---|---|---|
| S744  | 1 |   | + | + | + |   | + | + | A |
| S747  | 1 |   |   | + |   |   | + | + | A |
| S782  |   |   | + |   | + |   |   |   | A |
| S785  | 1 |   |   |   |   |   |   |   | A |
| T787  |   |   |   |   | + |   |   |   |   |
| S803  | 1 |   |   |   | + |   |   |   | A |
| S823  | 1 |   |   |   |   |   |   |   | A |
| S830  | 2 | + |   |   |   |   |   |   |   |
| T838  | 1 |   |   |   |   |   |   |   | A |
| T839  |   |   | + |   |   |   |   |   | A |
| S840  | 2 |   | + | + | + |   |   |   | A |
| T1017 | 2 |   | + | + | + |   |   |   | A |
| S1024 | 1 |   |   |   |   |   |   |   | A |
| S1025 |   |   | + |   |   |   |   |   | A |
| S1026 | 3 |   | + | + |   | + | + |   | A |
| S1032 | 5 | + | + | + | + |   |   |   | A |
| S1034 | 2 |   |   |   |   |   |   |   | A |
| T1042 | 3 | + | + | + | + |   |   |   | A |
| T1049 | 3 |   | + | + |   |   |   |   | A |
| S1055 | 2 |   | + | + | + |   |   |   | A |
| S1056 | 2 | + | + | + | + |   |   | + | A |
| S1059 | 2 |   |   | + | + |   |   |   | A |
| S1066 | 2 |   | + | + | + |   |   |   | A |
| S1069 |   |   |   | + |   |   |   |   | A |
| S1070 |   |   | + |   | + |   |   |   | A |
| S1082 | 5 |   | + | + | + |   |   |   | A |
| S1084 | 2 |   | + |   |   |   |   |   | A |
| S1085 | 2 |   | + |   |   |   |   |   | A |
| S1091 |   |   |   | + |   |   |   |   | A |
| S1166 | 1 |   |   |   |   |   |   |   | A |

## **Supporting databases (Excel spreadsheets)**

**Database S1.** Summary of phospho-proteomics results for inhibiting Cdc15 and Cdc5 in anaphase cells and Cdc5 in metaphase cells.

**Database S2.** Complete list of phosphopeptides for each phosphorylation site detected in the DIA-MS experiments.
