# Supplementary material for: Cross-compartment signal propagation in the Mitotic Exit Network
Source: bioRxiv preprint, doi:10.1101/2020.10.01.322719, version 2 (2020-12-17)
Supplement: Dataset S2 [file 322719_file07.xlsx]

## Sheet: anaphase
ProteinAccession	GeneName	Site	Peptide detected	CDC15_replicate_1	CDC15_replicate_2	CDC15_replicate_3	CDC15_replicate_4	CDC15_replicate_5	CDC15_replicate_6	CDC15_replicate_7	CDC15_mean	CDC15_# of replicates detected	cdc15as1_replicate_1	cdc15as1_replicate_2	cdc15as1_replicate_3	cdc15as1_replicate_4	cdc15as1_replicate_5	cdc15as1_replicate_6	cdc15as1_replicate_7	cdc15as1_mean	cdc15as1_# of replicates detected	Ratio_CDC15 to cdc15as1	adjusted p-value_CDC15 to cdc15as1	dN_CDC15 to cdc15as1	CDC5_replicate_1	CDC5_replicate_2	CDC5_replicate_3	CDC5_replicate_4	CDC5_replicate_5	CDC5_replicate_6	CDC5_replicate_7	CDC5_mean	CDC5_# of replicates detected	cdc5as1_replicate_1	cdc5as1_replicate_2	cdc5as1_replicate_3	cdc5as1_replicate_4	cdc5as1_replicate_5	cdc5as1_replicate_6	cdc5as1_replicate_7	cdc5as1_mean	cdc5as1_# of replicates detected	Ratio_CDC5 to cdc5as1	adjusted p-value_CDC5 to cdc5as1	dN_CDC5 to cdc5as1
P53909	AAH1	3	_VS[Phospho (STY)]VEFLQELPK_.2	1377.75	1851.13	2798.9	1624.45	2484.89	3392.02	2617.95	2306.73	7	719.729	1953.91	2443.95	2311.52	2435.33	796.33	1497.99	1736.96	7	1.32802	0.514458	0	2427.07	3673.44	3230.49	3235.92	3975.06	4088.1	3838.91	3495.57	7	3275.44	3871.67	2859.34	2619.09	3385.75	2751.56	3185.78	3135.52	7	1.11483	0.524374	0
P53909	AAH1	264	_LQVVQS[Phospho (STY)]VSELPLQK_.2	11851.5	7153.86	6261	6825.58	6931.84	7546.3	6539.69	7587.11	7	9254.07	5390.22	5374.73	4364.42	3767.66	4531.92	6939.98	5660.43	7	1.34038	0.350845	0	12301.8	8536.56	9211.03	11582.7	11499.3	8610.33	7633.26	9910.7	7	14595.2	12080.1	10785.5	8990.99	10766	11121.9	12750.4	11584.3	7	0.85553	0.364362	0
P53909	AAH1	266	_LQVVQSVS[Phospho (STY)]ELPLQK_.2									0									0			0						5034.88		5034.88	1									0			1
P37898	AAP1	418	_Y[Phospho (STY)]GNAKT[Phospho (STY)]GDLWDALADAS[Phospho (STY)]GK_.2		24610.2	30471.6	34684	26859.3	27939	24231.6	28132.6	6		16585.7	19942.7	16231.2	15193.6	24646.8	27278.5	19979.7	6	1.40806	0.0922171	0	30545.6	39173.8	35555.6	40615.3	36327.3	34500.2	31495.9	35459.1	7	26251.8	31889.2	32987.5	29288.7	32704.9	31399.8	29750.3	30610.3	7	1.1584	0.0898572	0
P37898	AAP1	423	_Y[Phospho (STY)]GNAKT[Phospho (STY)]GDLWDALADAS[Phospho (STY)]GK_.2		24610.2	30471.6	34684	26859.3	27939	24231.6	28132.6	6		16585.7	19942.7	16231.2	15193.6	24646.8	27278.5	19979.7	6	1.40806	0.0922171	0	30545.6	39173.8	35555.6	40615.3	36327.3	34500.2	31495.9	35459.1	7	26251.8	31889.2	32987.5	29288.7	32704.9	31399.8	29750.3	30610.3	7	1.1584	0.0898572	0
P37898	AAP1	434	_Y[Phospho (STY)]GNAKT[Phospho (STY)]GDLWDALADAS[Phospho (STY)]GK_.2		24610.2	30471.6	34684	26859.3	27939	24231.6	28132.6	6		16585.7	19942.7	16231.2	15193.6	24646.8	27278.5	19979.7	6	1.40806	0.0922171	0	30545.6	39173.8	35555.6	40615.3	36327.3	34500.2	31495.9	35459.1	7	26251.8	31889.2	32987.5	29288.7	32704.9	31399.8	29750.3	30610.3	7	1.1584	0.0898572	0
P37898	AAP1	455	_VGFPVLS[Phospho (STY)]VK_.2	2992.99	2764.49	4433.95	1939.39	3856.61	3079.77	3087.66	3164.98	7	838.328	6612.23	4499.93	5930.25	5284.73	5118.77	2736.43	4431.52	7	0.714197	0.475062	0	2599.84	7267.17	5784.97	5415.05	5745.76	5223.1	6302.44	5476.9	7	2080.25	10199.3	10555	9309.88	5712.56	5410.29	5200.1	6923.91	7	0.791013	0.607733	0
P32357	AAR2	331	_DNEDDALIYGIS[Phospho (STY)]DEER_.2				21534.4		24036.9		22785.7	2	45224.6							45224.6	1	0.503833	0.296455	1		14234.5				14108.6		14171.6	2		23266.7						23266.7	1	0.609095	0.061291	1
P23542	AAT2	294	_S[Phospho (STY)]EVSNPPAYGAK_.2	28662.3	11755.9	19025.7	6667.79	18360.9	17971.4	17279.8	17103.4	7		35757.3	30391.2	35713.5	25940.4	29511.8	8647.58	27660.3	6	0.618337	0.248254	1	30644.2	35138.3	30911.8	30738.6	25373.6	35476	33294.8	31653.9	7	17567.1	35602	46175.5	37062.2	23347.2	18270.9	11411.9	27062.4	7	1.16966	0.683478	0
P23542	AAT2	389	_AS[Phospho (STY)]IAGLNQGNVEYVAK_.2	2168.28	100.845	4302.61		2404.09		2774.9	2350.15	5		7015.48	3216.81	4307.95	4876.8	4617.68	663.023	4116.29	6	0.570938	0.483987	-1	3541.47	5701.59	4802.29	3360.69	3622.42	5513.29	6614.59	4736.62	7	2795.55	5401.39	7032.11	7085.44	4089.36	3075.7	2723.05	4600.37	7	1.02962	0.956007	0
P32783	ABD1	115	_S[Phospho (STY)]INVDQIVR_.2	27553.4	37059	31209	40586	33099	32503.1	30576.9	33226.6	7	85788.3	69322.1	74322.3	72721.7	60348.3	72640.1	117402	78935	7	0.420937	0.00124712	0	11777	30668.4	31773.5	31659.2	28924.3	28055.4	24476.6	26762.1	7	1240.7	1964.94	2111.22	1945.6	1774.49	1586.66	1890.93	1787.79	7	14.9693	3.6299e-05	0
P14164	ABF1	198	_NDTEDDSINKAS[Phospho (STY)]IDR_.2	997.905	2291.87	2277.07	2796.03	2348.24	2211.21	2983.18	2272.22	7	3616.44	2845.25	1413.87	323.581	1564.95	2232.07	3344.68	2191.55	7	1.03681	0.959915	0	2501.36	1748.28	2746.56	1800.5	2567.4	2157.25	1227.93	2107.04	7	2430.76	1595.62	1227.83	1262.98	1280.03	1998.99	2324.51	1731.53	7	1.21686	0.522667	0
P14164	ABF1	207	_GLDDES[Phospho (STY)]GPTHGNDSGNHR_.3		9551.17	5086.89	5316.43	5923.54	9742.68		7124.14	5	9720.27	4386.79	8315.29	9069.4	8835.82	3682.61	9947.66	7708.26	7	0.924222	0.888892	-2	9273.26	3956.21	6727.01		2786.69	5420.28	6850.94	5835.73	6	8576.88	2225.92	4176.95	2828.68	4595.25	3458.13	6689.16	4650.14	7	1.25496	0.680774	-1
P14164	ABF1	215	_GLDDESGPTHGNDS[Phospho (STY)]GNHR_.3	27863.2	34153.1	26834.4	23896.9	29760.1	37618.2	33616.2	30534.6	7	30297.8	28092.6	31406.8	30338.2	38260.7	22880.4	38316.8	31370.5	7	0.973354	0.92002	0	28909.2	23400.5	29058.5	19415.6		29690.4	30405.7	26813.3	6	20620.8	10633.2	15273.5		14026.6	14503	17225.6	15380.5	6	1.74334	0.00715486	0
P14164	ABF1	459	_MGEYNDLQPSSSSNNNNNNDGELS[Phospho (STY)]GTNLR_.3					6212.01		6672.79	6442.4	2					7630.67	7510.61	7693.98	7611.75	3	0.846375	0.0768711	-1									0									0			0
P14164	ABF1	461	_MGEYNDLQPSSSSNNNNNNDGELSGT[Phospho (STY)]NLR_.3									0									0			0				6896.3				6896.3	1									0			1
P14164	ABF1	467	_SNS[Phospho (STY)]IDYAK_.2	89520.6	337158	383830	453499	333316	358895	268804	317860	7	109253	273989	224106	218628	216258	344935	335126	246042	7	1.29189	0.554934	0	114337	399062	238584	280661	252674	326019	302281	273374	7	177246	208477	323057	324306	123891	346528	185649	241308	7	1.13289	0.77649	0
P14164	ABF1	467	_SNS[Phospho (STY)]IDYAK_.1	11838.8	7335.89	8699.91	10039.8	7450.54	8002.64	8685.87	8864.78	7	17569.3	7207.83	2097.99	1973.6	4526.73	5721.14	9281.9	6911.22	7	1.28266	0.717648	0	10254.1	7005.6	12202.5	5047.55	10064.5	7039.26		8602.24	6	24857	5302.69	9137.08	7018.58	9551.22	9779.31	5550.81	10171	7	0.845765	0.83018	-1
P14164	ABF1	478	_HQEISS[Phospho (STY)]AGTSSNTTK_.2	1561.72							1561.72	1									0			1									0							1122.44	1122.44	1			-1
P14164	ABF1	496	_NDS[Phospho (STY)]NDDNNGNNNNDASNLMESVLDK_.3	9246		6988.13	6501.31	9192.53	6094.54	4814.28	7139.47	6			5225.53	5972.67		5179.67	5319.08	5424.24	4	1.31622	0.38177	2	5834.32	7002.16	8023.32	7710.72	7845.96		6097.49	7085.66	6	4106.84	10628.3	8843.14	6221.83	7407.05	8195.73		7567.15	6	0.936372	0.848088	0
P14164	ABF1	618	_NVVDENLINDMDS[Phospho (STY)]EDAHK_.3	48340.9	55736.8	44294.6	42532.2	50282.7	46136.4	41998.3	47046	7	78815.8	45243.7	57804.1	56124.7	52373.6	49487.2	38759.9	54087	7	0.869821	0.54611	0	59585.4	39833	44150.8	34247.4	40671	38722.1	43475.5	42955	7	75958.8	35753.1	46398.3	36199.8	47042.3	45397.8	50517.1	48181	7	0.891534	0.700526	0
P14164	ABF1	618	_NVVDENLINDMDS[Phospho (STY)]EDAHK_.2	24563.4	20733.9	13606.9	17602.3	19185.5	21239.4	18294.5	19318	7	47839.7	19412.9	20267.1	21739.8	17831.6	23493.3	16864.7	23921.3	7	0.807564	0.659641	0	29992.8	18028.1	19730.8	14285.5	18548	14069.5	18732.5	19055.3	7	41581	16651.9	17621.9	14925.4	21647.4	21202.6	20467.9	22014	7	0.8656	0.752238	0
P14164	ABF1	618	_NVVDENLINDM[Oxidation (M)]DS[Phospho (STY)]EDAHK_.3	1253.21	2175.45	2445.51	2356.98	2696.64	1734.72	1741.08	2057.66	7	2563.76	1932.17	2453.53	2638.09	2601.13	3272.08	3112.58	2653.33	7	0.775498	0.214392	0	2249.92	959.477	1982.57	733.612	762.848	1319.09	1115.63	1303.31	7	2404.57		1011.18	1483.8	2002.34	1909.12	2031.92	1807.16	6	0.721192	0.396892	1
P14164	ABF1	655	_LLS[Phospho (STY)]SHLK_.2	43631.7	45239	37160	50664.8	41845.7	38193.2	38823.8	42222.6	7	11397.5							11397.5	1	3.70453	0.0151793	6	75606.2	36227.2	29386.8	25895.8	35382.9	33645.9	35483.8	38804.1	7	10323.3			7402.74			13231.3	10319.1	3	3.76041	0.129148	4
P14164	ABF1	720	_ADDEEDLS[Phospho (STY)]DENIQPELR_.2	163394	906336	104868	182435	185293	1.46452e+06	113128	445710	7	1.44451e+06	162765	210468	892146	653828	1.02945e+06	58106.3	635897	7	0.700917	0.801563	0	230252	200196	191318	131899	61981.4	111629	778305	243654	7	226264	156155	839196	786264	57251.3	71137.3	32136.2	309772	7	0.78656	0.874215	0
P14164	ABF1	720	_ADDEEDLS[Phospho (STY)]DENIQPELR_.3	440454	78415.7	125582	151067	123403	99369.2	94906.3	159028	7	300613	277261	129271	95331.6	71097	98081.8	85660.5	151045	7	1.05285	0.967121	0	321890	91038.1	93820.1	118565	87838	110632	84546.8	129761	7	304398	85525.3	84367.7	115742	70573.7	96679.1	106961	123464	7	1.05101	0.959829	0
Q02486	ABF2	132	_S[Phospho (STY)]QVFAQHPDK_.2	25831	9895.63	14479.8	6775.46	13893.3	13791.4	14278.9	14135.1	7	14612.7	21718	17680.3	21894.2	19185.1	15387.6	9166.81	17092.1	7	0.826994	0.668292	0	29358	18776.5	17675.3	16076.4	12491.9	17777.7	19813	18852.7	7	19270	11101.2	20542.6	16698.1	12207.5	11107.4	12883.8	14830.1	7	1.27124	0.400586	0
Q02486	ABF2	156	_WQS[Phospho (STY)]LDQSIK_.2	9716.5		6356.58		5496.91		5364.66	6733.66	4		8754.77	7947.74	8661.51	8214.51	7390.6		8193.83	5	0.821797	0.504249	-1	8319.34	8073.63	6966.82	6503.6	5529.02	7489.08	9462.74	7477.75	7		8818.75	8689.07	8175.48	7262.19	4035.97	6205.79	7197.88	6	1.03888	0.90442	1
P15891	ABP1	165	_SFT[Phospho (STY)]PSKS[Phospho (STY)]PAPVSK_.2	193167	138226	147509		136645	122304	114553	142067	6	210461	158164	149613	160619	128637	165499	164389	162483	7	0.87435	0.535027	-1	191021	116415	128813	124064	119460	119949	115203	130703	7	225640	218738	233691	208235		192786	227745	217806	6	0.600092	0.000583511	1
P15891	ABP1	165	_SFT[Phospho (STY)]PSKSPAPVSK_.2		9072.82	4981.27	9434.62	7064.37			7638.27	4		8135.89	3345.79	6518.84	8504.24	12006	13804.2	8719.17	6	0.876032	0.853519	-2	2259.96	3147.75	10468.1		6213.63		5334.26	5484.74	5	7716.12	13270	12893.3	20462.4	16490.8	20584.3	21597.5	16144.9	7	0.339719	0.024026	-2
P15891	ABP1	169	_SFTPSKS[Phospho (STY)]PAPVSK_.2	320762	200448	178187	173423	166370	172559	143360	193587	7	415339	137663	145265	161026	139255	179367	212862	198682	7	0.974354	0.971763	0	411881	149512	142696	138363	140422	139149	137934	179994	7	470435	137975	163669	149279	151221	158084	368646	228473	7	0.787813	0.747787	0
P15891	ABP1	169	_SFTPSKS[Phospho (STY)]PAPVSK_.3	14283.3	9973.9	7328.95	6467.06	5673.95	5140.47	5622.88	7784.36	7	12535.7	5259.53	5520.4	4695.51	4955.28	6946.32	6461.11	6624.83	7	1.17503	0.787351	0	15882.7		5665.16		5620.06	5519.37	6363.17	7810.1	5	21521.1	4724.63		6141.46	5708.46	6198.97	13872.8	9694.56	6	0.805617	0.83023	-1
P15891	ABP1	169	_SFT[Phospho (STY)]PSKS[Phospho (STY)]PAPVSK_.2	193167	138226	147509		136645	122304	114553	142067	6	210461	158164	149613	160619	128637	165499	164389	162483	7	0.87435	0.535027	-1	191021	116415	128813	124064	119460	119949	115203	130703	7	225640	218738	233691	208235		192786	227745	217806	6	0.600092	0.000583511	1
P15891	ABP1	181	_KEPVKT[Phospho (STY)]PS[Phospho (STY)]PAPAAK_.3	96717.2	77304.5	63386.6	68105.1	65120.2	69667	68476.4	72682.4	7	109494	76827.9	83302.2	98542.7	80896	61660	87736	85494.2	7	0.850145	0.3942	0	130783	63627	87217.8	76158.6	50536.9	63359	66702.6	76912.2	7	122055	79974.2	86790.7	61652.8	90556.9	70612.5	125445	91012.4	7	0.845074	0.63685	0
P15891	ABP1	181	_KEPVKT[Phospho (STY)]PS[Phospho (STY)]PAPAAK_.2	18395.2	11523	9673.96	9457.26	8376.17	9358.56	8625.66	10772.8	7	34408.5	12618.6	11054.4	11162.4	12238.7	11388.9	13359	15175.8	7	0.709871	0.587846	0	22331.8	9572.3	11860.6	8877.43	7441.61	10002.3	10136.5	11460.4	7	33456.5	11905.1	16592.3	12562.3	13051.1	10222.7	20276.1	16866.6	7	0.679472	0.445796	0
P15891	ABP1	181	_EPVKT[Phospho (STY)]PS[Phospho (STY)]PAPAAK_.2	8235.47	4110.5	6650.62	6536.1	4855.38	5096.15	4670.31	5736.36	7	7411.26	7742.82	6318.48	6956.11	4976.61	6891.08	6918.13	6744.93	7	0.850471	0.473616	0	10507.4	6136.34	7248.78	5674.19	5367.31	5531.41	4751.48	6459.56	7	7638.04	9169.65	9635.09	8677.66	6283.29	6680.46	7290.68	7910.7	7	0.816561	0.391437	0
P15891	ABP1	181	_KEPVKT[Phospho (STY)]PSPAPAAK_.3	1896.37	14233	6957.03			11218.9	11940.4	9249.16	5	10507.5			7043.18	8222.04		15602.4	10343.8	4	0.894177	0.902881	1	20700.3	4917.66		6729.98	7381.86	8647.44		9675.45	5	8338.96			2337.48	7759.54		22227	10165.7	4	0.951771	0.972196	1
P15891	ABP1	183	_KEPVKT[Phospho (STY)]PS[Phospho (STY)]PAPAAK_.3	96717.2	77304.5	63386.6	68105.1	65120.2	69667	68476.4	72682.4	7	109494	76827.9	83302.2	98542.7	80896	61660	87736	85494.2	7	0.850145	0.3942	0	130783	63627	87217.8	76158.6	50536.9	63359	66702.6	76912.2	7	122055	79974.2	86790.7	61652.8	90556.9	70612.5	125445	91012.4	7	0.845074	0.63685	0
P15891	ABP1	183	_KEPVKT[Phospho (STY)]PS[Phospho (STY)]PAPAAK_.2	18395.2	11523	9673.96	9457.26	8376.17	9358.56	8625.66	10772.8	7	34408.5	12618.6	11054.4	11162.4	12238.7	11388.9	13359	15175.8	7	0.709871	0.587846	0	22331.8	9572.3	11860.6	8877.43	7441.61	10002.3	10136.5	11460.4	7	33456.5	11905.1	16592.3	12562.3	13051.1	10222.7	20276.1	16866.6	7	0.679472	0.445796	0
P15891	ABP1	183	_EPVKT[Phospho (STY)]PS[Phospho (STY)]PAPAAK_.2	8235.47	4110.5	6650.62	6536.1	4855.38	5096.15	4670.31	5736.36	7	7411.26	7742.82	6318.48	6956.11	4976.61	6891.08	6918.13	6744.93	7	0.850471	0.473616	0	10507.4	6136.34	7248.78	5674.19	5367.31	5531.41	4751.48	6459.56	7	7638.04	9169.65	9635.09	8677.66	6283.29	6680.46	7290.68	7910.7	7	0.816561	0.391437	0
P15891	ABP1	183	_TPS[Phospho (STY)]PAPAAK_.2	26270.5	26877.9	82496.6	20642	155652	69934	281575	94778.2	7	81790	131643	150065	161243	76290.5	153346	155269	129950	7	0.729346	0.719615	0	18764.5	29036.2	23315.7	79948.5	136644	64428.8	97942	64297	7	25099.4	129272	77349.3	191761	306528	118300	130320	139804	7	0.459908	0.277287	0
P15891	ABP1	183	_TPS[Phospho (STY)]PAPAAK_.1					4306.34		7954.18	6130.26	2	10871.3						5521.77	8196.53	2	0.747909	0.840919	0	519.35				2100.56			1309.96	2	3620.88			5401.99	9552.45		4700.02	5818.83	4	0.225124	0.320554	-2
P15891	ABP1	183	_KEPVKTPS[Phospho (STY)]PAPAAK_.3		2286.62						2286.62	1							3837.65	3837.65	1	0.595839		0									0							4982.53	4982.53	1			-1
P15891	ABP1	223	_DFDQAPLKPNQS[Phospho (STY)]SYKPIGK_.3	27944.1	149967	58728	47324.2	77457.5	123267	112418	85300.9	7	94639.3	59184.3	107226	121763	90879.2	55441.3	86411.4	87934.9	7	0.970046	0.965635	0	75609.4	63091.6	87390.8	38267.2	43211	70040.1	145133	74677.6	7	92254.4	28977.9	61630.1	45584.1	156201	61683.8	104250	78654.5	7	0.949438	0.94644	0
P15891	ABP1	223	_DFDQAPLKPNQS[Phospho (STY)]SYKPIGK_.2							3303.9	3303.9	1									0			1							5364.72	5364.72	1	15112.5				7050.71			11081.6	2	0.48411	0.807581	-1
P15891	ABP1	262	_IDPS[Phospho (STY)]SDIANLK_.2	27117.3	17925.9	22724	20224.3	21677.3	17702.9	15942.8	20473.5	7									0			7	16620.7	13738.2	11579.7	13781.6			11655.5	13475.1	5									0			5
P15891	ABP1	291	_DSEFNSFLGTTKPPS[Phospho (STY)]MTESSLK_.3	9928.78					5713.96	5683.58	7108.77	3	8576.15	6187.09	6495.43					7086.22	3	1.00318	0.997733	0	10232.9							10232.9	1	9700.95			5366.66	4986.15			6684.59	3	1.53082	0.673791	-2
P15891	ABP1	313	_S[Phospho (STY)]PAQLWAER_.2	53826	32086.9	45715.8	35384.1	43161.4	37645.2	38774.6	40942	7	26561.2	50627.1	43886.4	45954.3	37563.5	47657.4	31279.1	40504.1	7	1.01081	0.975857	0	24492.6	47443.7	44165.3	46189.5	40679.7	42251.4	39275.4	40642.5	7	25544.4	46665.1	47331.1	43450.7	38040.9	37647.2	14522.3	36171.7	7	1.1236	0.722206	0
P15891	ABP1	365	_FEGLAAS[Phospho (STY)]EK_.2	12269.5	12453.8	14753.2	14686.2	11955.6	14304.4	12242	13237.8	7	8654.8	15973.8	14016.5	14810	13017	14796.4	15908	13882.4	7	0.95357	0.824787	0	13092.6	10411.9	13376.5	13306.9	13013.7	15258.6	12179	12948.5	7	3109.64	17176.3	16005.8	14555.4	12363.3	14179.9	3925.45	11616.5	7	1.11466	0.807161	0
P15891	ABP1	365	_FEGLAAS[Phospho (STY)]EKEEEEM[Oxidation (M)]ENK_.3	5941.17	10787.9	11882.6	14839.1	15209.2	15888.4	10168.6	12102.4	7	2422.31	12477	8785.22	11730.7	10761.2	11807.6	15060.3	10434.9	7	1.1598	0.751784	0	4799.39	7431.94	7464.84	6609.24	7585.38	7435.57	9985.8	7330.31	7	3837.7	5621.82	6630.67	10247.3	7173.74	9674.25	12481.3	7952.4	7	0.921773	0.845237	0
P15891	ABP1	365	_FEGLAAS[Phospho (STY)]EKEEEEM[Oxidation (M)]ENK_.2	2103.2	4225.49	3100.95	4547.6	4122.64	5171.29	3777.32	3864.07	7	2019.51	2654.64	2571.84	3652.57	2618.6	3076.37	6230.27	3260.54	7	1.1851	0.715732	0	3532.26	2158.74	3160.65	519.157	2509.83	3304.99	3537.82	2674.78	7	2933.57	2463.88	2627.57	3113.32	1928.51	3342.81	3563.64	2853.33	7	0.937423	0.882372	0
P15891	ABP1	365	_FEGLAAS[Phospho (STY)]EKEEEEMENK_.3	3797.66	65619.7	64023.2	75664.4	70693.8	71764.8	65713.5	59611	7	4366.98	70157.6	64537.9	60993.7	62720.3	54763.7	52190.1	52818.6	7	1.1286	0.845203	0	5345.06	54061.4	46363.5	40359.4	56965.3	54434.2	58865.1	45199.1	7	10694.1	39579.7	46583.6	57940.5	43209.3	50848.6	65840.1	44956.5	7	1.0054	0.992346	0
P15891	ABP1	365	_FEGLAAS[Phospho (STY)]EKEEEEMENK_.2		27209.8	20845.8	25935.6	26877.8	33343.1	28744.4	27159.4	6	5324.64	26758.2	26174.3	22363.6	21303.9	20474	23179.1	20796.8	7	1.30594	0.350812	-1	6047.09	22549.1	20036.1	15683.8	23613.7	21294.9	23489	18959.1	7	17190.2	13816	20277.4	18341.6	14831.6	17284.5	27361.7	18443.3	7	1.02797	0.950354	0
P15891	ABP1	383	_S[Phospho (STY)]EPTIISPK_.2	28703.8	21014.8	24809.3	22897.6			19716.8	23428.5	5	18602.6	21915.2	21681	21898.4	17616	20465.2	19242.3	20203	7	1.15965	0.294489	-2	19591.7	18188.2	19199.4		19936.2	20455.4	18492.6	19310.6	6	10064.3	21014.6	19541.1	18799	16272.8			17138.3	5	1.12675	0.571863	1
P15891	ABP1	389	_SEPTIIS[Phospho (STY)]PK_.2	777892	601380	664498	658477	596952	587683	536473	631908	7	606648	556513	523670	578072	432139	543869	575798	545244	7	1.15894	0.208022	0	729089	600930	633949	631653	597720	588142	610015	627357	7	468081	696855	686062	643116	560846	601830	393047	578548	7	1.08436	0.632777	0
P15891	ABP1	389	_SEPTIIS[Phospho (STY)]PK_.1	33977.1	5615.87	4008.76		4150.75		3821.36	10314.8	5	20619	5276.54	2067.97		2152.75	3213.39	4082.36	6235.34	6	1.65424	0.811052	-1	26554.8	6928.26	7536.03	4498.32	5687.59	6226.94	6285.6	9102.51	7	15077.5		8815.82	6204.77	4159.21		2515.02	7354.47	5	1.23769	0.863104	2
P15891	ABP1	389	_KSEPTIIS[Phospho (STY)]PK_.2	59951.7	131179	46738.9	59119.6	69800.7	100123	115164	83153.9	7	181021	47178.7	78048.7	88529.9	85735.2	63711.3	128803	96146.9	7	0.864863	0.820091	0	150673	59733.7	88302.7	39198.5	48465.9	66701.9	99606.8	78954.6	7	190365	24006.3	69910.8	48149.2	96114.7	53150.9	224302	100857	7	0.782837	0.778087	0
P15891	ABP1	458	_NVAS[Phospho (STY)]GAPVQK_.2	170593	127693	147201	168779	128395	129290	117581	141361	7	39346	43638	41054.5	44453.3	30755.8	43636.5	45207	41155.9	7	3.43478	6.73429e-06	0	82931.1	83489.2	87880.9	95592.1	94374.9	80592.8	80876.6	86534	7	26090.5	39490.6	41747.3	42940.6	31803.7	36844.4	43741	37522.6	7	2.30618	7.85018e-07	0
P15891	ABP1	458	_NVAS[Phospho (STY)]GAPVQK_.1	18199.7	3170.81	4970.61	4965.6	5108.1	5094.49	4921.48	6632.97	7	7288.54	1688.23	515.05	910.654	1073	1677.41	1022.14	2025	7	3.27554	0.269317	0	15122	2759.41	3820.26	3733.41	3060.69	4036.1	2890.9	5060.39	7	5686.69	1135.31	1427.62	1373.12	1091.93	1025.23	1599.08	1905.57	7	2.65558	0.357437	0
P15891	ABP1	475	_EEPEQEEIAPS[Phospho (STY)]LPSR_.2	145752	103163	130609	127028	118268	106082	99381.5	118612	7	121496	132110	111175	116005	98226.8	111639	106530	113883	7	1.04152	0.81923	0	105992	97406.2	94830.9	101883	90937.4	89564.8	85287.3	95128.7	7	87684.8	109446	103899	110903	87674.1	88629.4	98176.9	98058.9	7	0.970118	0.799695	0
P15891	ABP1	478	_EEPEQEEIAPSLPS[Phospho (STY)]R_.2									0					6077.23			6077.23	1			-1									0									0			0
P15891	ABP1	481	_NS[Phospho (STY)]IPAPK_.2	448330	478198	539173	507583	493854	502423	381364	478703	7	279384	520459	418808	487782	378338	410249	478364	424769	7	1.12697	0.50269	0	325370	420023	375687	425076	421287	428278	408830	400650	7	261627	409683	431641	433536	232036	410559	414143	370461	7	1.08149	0.710329	0
P15891	ABP1	481	_NS[Phospho (STY)]IPAPK_.1	129941	31588.3	35502.7	45480.5	32410.8	33823.6	35775.1	49217.4	7	96335.4	34018.6	25688.2	27002.3	22675.9	32279.5	45652.2	40521.7	7	1.21459	0.850178	0	82609.1	31412.4	42327.2	28847.2	33739.1	31867	31673.6	40353.7	7	73537.4	35222.8	28041.3	27290.8	37696.5	33331.2	38123.9	39034.8	7	1.03379	0.959913	0
P15891	ABP1	514	_S[Phospho (STY)]SAAPPPPPR_.2									0									0			0						182670		182670	1									0			1
P15891	ABP1	515	_SS[Phospho (STY)]AAPPPPPR_.2	353104					191514	164554	236391	3	184095	214270	178455		148716	187638	189030	183701	6	1.28683	0.59249	-3	268537				156563		180526	201875	3	141894					155091		148493	2	1.3595	0.63134	1
Q08641	ABP140	26	_EEGDATVDTNS[Phospho (STY)]SSKPLK_.2	12079.6		6945.16				5763.41	8262.73	3	12799.9							12799.9	1	0.645532	0.708692	2	14043	6335.49	5605.97		5892.75	5149.97	5316.15	7057.23	6	12169.2	5382.55	6907.1			5760.28		7554.77	4	0.934141	0.934118	2
Q08641	ABP140	26	_EEGDATVDTNS[Phospho (STY)]SSKPLK_.3									0									0			0	2169.58		1357.78					1763.68	2	1921.88			2012.17				1967.02	2	0.896624	0.862792	0
Q08641	ABP140	93	_TAEKPLETNLPKPETNEEDEEEGS[Phospho (STY)]MSENK_.3		131006	46225.8	44431.5	55757.4	113160	91012.4	80265.5	6			76989.1	93676.2	68919.7	63164.7	56083.8	71766.7	5	1.11842	0.864781	1	61011.2	43485.8	92320.2	31324	40536.9	51498	95720	59413.7	7	94582.6	23522.4	45214.8	21730.7	103786	38385.6	69576.5	56685.4	7	1.04813	0.95167	0
Q08641	ABP140	93	_TAEKPLETNLPKPETNEEDEEEGS[Phospho (STY)]MSENK_.4		54894.9	19078	12416.4	17814.7	32389.8	35454.4	28674.7	6	36220	9268.36	19393.6	31281.5	26924.8	26459.7	21999.3	24506.8	7	1.17007	0.824498	-1	22289.5	18215.7	27746.9	12915	13436.3	24956.5	39268.3	22689.7	7	33577	10121.2	11933.5	8160.68	38195.4	13525.2	22923.1	19776.6	7	1.1473	0.838105	0
Q08641	ABP140	93	_TAEKPLETNLPKPETNEEDEEEGS[Phospho (STY)]M[Oxidation (M)]SENK_.4		7371.33	2830.78	4323.4			5500.6	5006.53	4			4884.33	4726.23	5470.21		5521.46	5150.56	4	0.972036	0.964428	0			5714.4				4001.69	4858.04	2	4172.17				5530.6			4851.38	2	1.00137	0.99817	0
Q08641	ABP140	95	_TAEKPLETNLPKPETNEEDEEEGSMS[Phospho (STY)]ENK_.3						44232.5	38476.8	41354.6	2				42372				42372	1	0.975991	0.958686	1			43474.6			23641	41069.3	36061.6	3									0			3
Q08641	ABP140	95	_TAEKPLETNLPKPETNEEDEEEGSMS[Phospho (STY)]ENK_.4		11697.7				6755.63	7360.36	8604.56	3			5945.12	7863.58	8085.27		7639.69	7383.42	4	1.16539	0.75586	-1			6587.46				7956.45	7271.95	2					7873.61		4096.76	5985.18	2	1.21499	0.820493	0
Q08641	ABP140	150	_EMENTGAEVLASSVEESDAIQEGVAEETEGIAT[Phospho (STY)]PK_.3		242130	153779	175120	125287	130869	140493	161280	6		71379.5	142610	112630	113219	112471	248557	133478	6	1.20829	0.724604	0		93212.6	72802.6	190057	132037	71791.6	90087.2	108331	6		31065	65182.4	69837.6		87851.1	104346	71656.5	5	1.51181	0.436816	1
Q08641	ABP140	150	_EMENTGAEVLASSVEESDAIQEGVAEETEGIAT[Phospho (STY)]PK_.4		19382.7			8901.11	16026	15271	14895.2	4		629.824	11476.6	2177.89	9473.38	406.077	2258.41	4403.7	6	3.38242	0.0775341	-2		2123.93	1484.71	6289.77	4180.43	7105.33	7741.02	4820.87	6					325.072		2759.7	1542.38	2	3.12559	0.451999	4
Q08641	ABP140	162	_NDES[Phospho (STY)]EEESANNASEPAEEYSQSEEDADIEQSNGK_.3		57936.2	49207.7	58181.5	51622.8		47762.7	52942.2	5		48752.3	44296.9	27358.2		54811		43804.6	4	1.2086	0.490406	1		55020.9	43376.8	60051	67536.5	64797.6	44897.9	55946.8	6		48344.1	41298.1	58119.7	36255.3	45710.3		45945.5	5	1.21768	0.366174	1
Q08641	ABP140	162	_NDES[Phospho (STY)]EEES[Phospho (STY)]ANNAS[Phospho (STY)]EPAEEYSQSEEDADIEQSNGK_.3			9110.66					9110.66	1					7795.63			7795.63	1	1.16869		0									0									0			0
Q08641	ABP140	162	_NDES[Phospho (STY)]EEESANNAS[Phospho (STY)]EPAEEY[Phospho (STY)]SQSEEDADIEQSNGK_.3				26808			38651.1	32729.5	2				13936.1		40596.9	14927.2	23153.4	3	1.41359	0.787351	-1		13926.1		13798.4	31329.4		27050.5	21526.1	4		8936.58			29624.1			19280.3	2	1.11648	0.933027	2
Q08641	ABP140	166	_NDES[Phospho (STY)]EEES[Phospho (STY)]ANNAS[Phospho (STY)]EPAEEYSQSEEDADIEQSNGK_.3			9110.66					9110.66	1					7795.63			7795.63	1	1.16869		0									0									0			0
Q08641	ABP140	171	_NDES[Phospho (STY)]EEES[Phospho (STY)]ANNAS[Phospho (STY)]EPAEEYSQSEEDADIEQSNGK_.3			9110.66					9110.66	1					7795.63			7795.63	1	1.16869		0									0									0			0
Q08641	ABP140	171	_NDES[Phospho (STY)]EEESANNAS[Phospho (STY)]EPAEEY[Phospho (STY)]SQSEEDADIEQSNGK_.3				26808			38651.1	32729.5	2				13936.1		40596.9	14927.2	23153.4	3	1.41359	0.787351	-1		13926.1		13798.4	31329.4		27050.5	21526.1	4		8936.58			29624.1			19280.3	2	1.11648	0.933027	2
Q08641	ABP140	177	_NDESEEESANNASEPAEEY[Phospho (STY)]SQSEEDADIEQSNGK_.3		21154.1					21291.7	21222.9	2							9588.19	9588.19	1	2.21344	0.0661491	1		26951.3		22490.5				24720.9	2				33560.5				33560.5	1	0.736607	0.579922	1
Q08641	ABP140	177	_NDES[Phospho (STY)]EEESANNAS[Phospho (STY)]EPAEEY[Phospho (STY)]SQSEEDADIEQSNGK_.3				26808			38651.1	32729.5	2				13936.1		40596.9	14927.2	23153.4	3	1.41359	0.787351	-1		13926.1		13798.4	31329.4		27050.5	21526.1	4		8936.58			29624.1			19280.3	2	1.11648	0.933027	2
Q08641	ABP140	178	_NDESEEESANNASEPAEEYS[Phospho (STY)]QSEEDADIEQSNGK_.3			15547.4	36601.3		10718		20955.6	3		39659.1	13115.5					26387.3	2	0.794153	0.904105	1			21689.8		24853.2			23271.5	2									0			2
Q08641	ABP140	180	_NDESEEESANNASEPAEEYSQS[Phospho (STY)]EEDADIEQSNGK_.3									0									0			0				26253.3	34802.7			30528	2		18642.3						18642.3	1	1.63757	0.667562	1
Q08641	ABP140	194	_ET[Phospho (STY)]ENAENASQQANDGSTSTTTSK_.3		5372.07						5372.07	1				3983.27				3983.27	1	1.34866		0	1513.76							1513.76	1									0			1
Q08641	ABP140	201	_ETENAENAS[Phospho (STY)]QQANDGSTSTTTSK_.2	6304.85	32562.7	36285.9	56973.3	25269.1	16455.7	41278.7	30732.9	7	22523.4	49482.8	35084.1	23809.1	14800.8	41559	24798.7	30294	7	1.01449	0.986741	0	8460.54	39182.7	39836.2	42202.7	54358.5	41056.3	26945.2	36006	7	13350.3	29324.9	38723.1	48345.6	36826.7	29935.1	17741.2	30606.7	7	1.17641	0.750195	0
Q08641	ABP140	201	_ETENAENAS[Phospho (STY)]QQANDGSTSTTTSK_.3			6349.54	14875.4	5269.2	4380.66	12547.3	8684.41	5		16196.9	7802.19			15635.1	6202.87	11459.3	4	0.757851	0.754618	1		12030.8	12020.2	9418.34		13993.1	8620.64	11216.6	5		9186.23	11807.1	14457.4	8471.77			10980.6	4	1.02149	0.959302	1
Q08641	ABP140	208	_ETENAENASQQANDGS[Phospho (STY)]TSTTTSK_.2				1813.37				1813.37	1									0			1			1393.04					1393.04	1									0			1
Q08641	ABP140	209	_ETENAENASQQANDGST[Phospho (STY)]STTTSK_.2									0									0			0									0				14692.5				14692.5	1			-1
Q08641	ABP140	210	_ETENAENASQQANDGSTS[Phospho (STY)]TTTSK_.2	3454.86	6896.71	8263.28	8528.75	5883.04	5600.42	5933.24	6365.76	7		6924.21	5313.23	4806.92	4305.91		5910.8	5452.21	5	1.16756	0.674375	2		7923.83	5863.7	6764.38	7332.49	7434.53	5689.64	6834.76	6		6503.64	7871.25	6815.09		6947.59	6033.12	6834.14	5	1.00009	0.999585	1
Q08641	ABP140	210	_ETENAENASQQANDGSTS[Phospho (STY)]TTTSK_.3									0									0			0	894.203							894.203	1									0			1
Q08641	ABP140	211	_ETENAENASQQANDGSTST[Phospho (STY)]TTSK_.2									0									0			0									0	3146.11							3146.11	1			-1
Q08641	ABP140	299	_EET[Phospho (STY)]LENIAHEGR_.2		1667.7	555.577	1043.72	1527.99	2122.17	2877.4	1632.43	6	8279.06	3539.6	4182.13	4129.96	4446.13	3166.77	5666.1	4772.82	7	0.342025	0.0267857	-1	3273.64	2154.8	2167.84	249.8	2175.25	1901.62	3637.87	2222.97	7									0			7
Q08641	ABP140	321	_GDNTGDQNAVEKS[Phospho (STY)]DFEKS[Phospho (STY)]DTEGSR_.3	102564	191697	204282	235380	194648	147365	187076	180430	7	101420	204702	164573	102246	132146	192893	170392	152625	7	1.18218	0.600067	0	191527	168174	163349	191327	175037	155019	146431	170123	7	184215	157547	169245	195585	146236	176563	153635	169004	7	1.00663	0.965678	0
Q08641	ABP140	321	_GDNTGDQNAVEKS[Phospho (STY)]DFEKS[Phospho (STY)]DTEGSR_.2	8151.17	5901.08	9243.36	10151.9	8153.02	5518.18	9474.39	8084.73	7	10865.7	9746.03	7129.81	3007.14	6152.43	6386.32	7280.36	7223.97	7	1.11915	0.784096	0	24757.9	8859.67	10617.3	7480.27	8381.61	7512.73	7001.75	10658.8	7	20625.4	5529.51	10347.5	9973.07	5149.31	10099.1	5328.18	9578.86	7	1.11274	0.896592	0
Q08641	ABP140	321	_GDNTGDQNAVEKS[Phospho (STY)]DFEKS[Phospho (STY)]DTEGSR_.4		5851.03	4723.42	7712.36	7036.84	5280.32	5347.64	5991.93	6		5758.26	2818.38	2474.19	4719.29	5074.29	5104.32	4324.79	6	1.38549	0.241529	0	4983.97	5168.17	5579.91	3347.69	5873.57	2605.09	4036.39	4513.54	7	4632.24	4644.11	4601.35	4187.58	5727.12	4755.22	3277.78	4546.49	7	0.992754	0.981689	0
Q08641	ABP140	321	_GDNTGDQNAVEKS[Phospho (STY)]DFEK_.3	58195.2	64698.8	77130.7	75556.7	81070	75735.6	66171.9	71222.7	7	40335.1	70320.6	60376.9	62201.7	56753	61562.4	64385.4	59419.3	7	1.19865	0.182072	0	70666.9	65330.5	60039.7	66688.7	57671.7	67552.4	63014.9	64423.5	7	59525.9	71766.6	93273.3	71311.3	52576.9	78688.7	62126.3	69895.6	7	0.921711	0.647507	0
Q08641	ABP140	321	_GDNTGDQNAVEKS[Phospho (STY)]DFEK_.2	69956.5	45448.8	46487	47133.1	39593.6	40792.1	36696.4	46586.8	7	53376.6	52609.2	37875.7	36291.3	40358.3	39746.1	46764.1	43860.2	7	1.06217	0.841694	0	82551.8	40846.6	46935.5	36947.4	38465.3	36473.3	43807.6	46575.4	7	68198.2	49893.1	57730.7	46559.1	38086	47601.8	53106.8	51596.5	7	0.902684	0.768689	0
Q08641	ABP140	321	_S[Phospho (STY)]DFEKS[Phospho (STY)]DTEGSR_.2							1653.7	1653.7	1	1140.98		1389.85				1188.91	1239.91	3	1.33372	0.415318	-2									0					1705.6			1705.6	1			-1
Q08641	ABP140	326	_GDNTGDQNAVEKS[Phospho (STY)]DFEKS[Phospho (STY)]DTEGSR_.3	102564	191697	204282	235380	194648	147365	187076	180430	7	101420	204702	164573	102246	132146	192893	170392	152625	7	1.18218	0.600067	0	191527	168174	163349	191327	175037	155019	146431	170123	7	184215	157547	169245	195585	146236	176563	153635	169004	7	1.00663	0.965678	0
Q08641	ABP140	326	_GDNTGDQNAVEKS[Phospho (STY)]DFEKS[Phospho (STY)]DTEGSR_.2	8151.17	5901.08	9243.36	10151.9	8153.02	5518.18	9474.39	8084.73	7	10865.7	9746.03	7129.81	3007.14	6152.43	6386.32	7280.36	7223.97	7	1.11915	0.784096	0	24757.9	8859.67	10617.3	7480.27	8381.61	7512.73	7001.75	10658.8	7	20625.4	5529.51	10347.5	9973.07	5149.31	10099.1	5328.18	9578.86	7	1.11274	0.896592	0
Q08641	ABP140	326	_GDNTGDQNAVEKS[Phospho (STY)]DFEKS[Phospho (STY)]DTEGSR_.4		5851.03	4723.42	7712.36	7036.84	5280.32	5347.64	5991.93	6		5758.26	2818.38	2474.19	4719.29	5074.29	5104.32	4324.79	6	1.38549	0.241529	0	4983.97	5168.17	5579.91	3347.69	5873.57	2605.09	4036.39	4513.54	7	4632.24	4644.11	4601.35	4187.58	5727.12	4755.22	3277.78	4546.49	7	0.992754	0.981689	0
Q08641	ABP140	326	_SDFEKS[Phospho (STY)]DTEGSR_.2	15084.4	26873.3	47147.3	46777.6	50373.4	31949.6	90773	44139.8	7	48887.5	74232.9	83966.9	45726.1	40090.9	54419.6	38520.1	55120.6	7	0.800786	0.698688	0	24498.6	56795.1	23753	47906.2	48167.8	43837.2	36000.1	40136.9	7	24776.4	42382	71609.1	78472.5	51059.6	39359.3	62151.9	52830.1	7	0.759735	0.462778	0
Q08641	ABP140	326	_SDFEKS[Phospho (STY)]DTEGSR_.3	3508.81	5622.09	11378.7	15718.7	16068.4	9005.01	28122.5	12774.9	7	6030.01	21459	18615	8890.71	13235.8	18088.9	16227.3	14649.5	7	0.872035	0.857188	0	5453.93	11548.7	5654	8715.99	11064	10664.5	9240.92	8906	7	4505.18	9057.11	27182.8	16888.3	14901.6	10873.5	10786.4	13456.4	7	0.66184	0.42395	0
Q08641	ABP140	326	_S[Phospho (STY)]DFEKS[Phospho (STY)]DTEGSR_.2							1653.7	1653.7	1	1140.98		1389.85				1188.91	1239.91	3	1.33372	0.415318	-2									0					1705.6			1705.6	1			-1
P31787	ACB1	3	_VS[Phospho (STY)]QLFEEK_.2	20135.8	7673.24	14240.5	5996.49	13931.7	13009.5	10643.2	12232.9	7	6393.3	23877.4	20776.8	22781.2	19663	19759	5114.91	16909.4	7	0.72344	0.549886	0	24373.8	20972.5	19046.5	20709.3	16502.1	18939.3	22734.5	20468.3	7	14910.5	24658.4	26714.8	24075.2	15643.2	11050.8	8634.15	17955.3	7	1.13996	0.703984	0
Q00955	ACC1	44	_LEES[Phospho (STY)]PLR_.2	4072.74	11849.9	11573.1	15473.2	9493.68	9360.07	12238.4	10580.1	7	2799.73	16855.5	13057.6	11550.9	10392.8	17124.8	13047.9	12118.5	7	0.873061	0.800417	0	4991.41	10939.5	12855.5	11437	11834.9	12258.1	9805.23	10588.8	7	2249.03	18651.4	15447.9	18708.2	14714.8	13623.1	10765.7	13451.5	7	0.787187	0.567914	0
Q00955	ACC1	188	_IS[Phospho (STY)]S[Phospho (STY)]TIVAQS[Phospho (STY)]AK_.2	1333.92					3367.95	3877.28	2859.72	3									0			3									0									0			0
Q00955	ACC1	189	_ISS[Phospho (STY)]TIVAQS[Phospho (STY)]AK_.2				47746.6		41233	39818.6	42932.7	3		35137.1	24471		25465.3			28357.8	3	1.51396	0.170383	0	41730.2	40834		42950.6		40148.9		41415.9	4	16481.5	29853	28041	30454.4		28044.6	11061.9	23989.4	6	1.72643	0.0317357	-2
Q00955	ACC1	189	_IS[Phospho (STY)]S[Phospho (STY)]TIVAQS[Phospho (STY)]AK_.2	1333.92					3367.95	3877.28	2859.72	3									0			3									0									0			0
Q00955	ACC1	195	_ISS[Phospho (STY)]TIVAQS[Phospho (STY)]AK_.2				47746.6		41233	39818.6	42932.7	3		35137.1	24471		25465.3			28357.8	3	1.51396	0.170383	0	41730.2	40834		42950.6		40148.9		41415.9	4	16481.5	29853	28041	30454.4		28044.6	11061.9	23989.4	6	1.72643	0.0317357	-2
Q00955	ACC1	195	_IS[Phospho (STY)]S[Phospho (STY)]TIVAQS[Phospho (STY)]AK_.2	1333.92					3367.95	3877.28	2859.72	3									0			3									0									0			0
Q00955	ACC1	233	_GC[Carbamidomethyl (C)]C[Carbamidomethyl (C)]T[Phospho (STY)]SPEDGLQK_.2	4435.98							4435.98	1	5216.11				3549.55			4382.83	2	1.01213	0.993681	-1									0	3873.95							3873.95	1			-1
Q00955	ACC1	234	_GC[Carbamidomethyl (C)]C[Carbamidomethyl (C)]TS[Phospho (STY)]PEDGLQK_.2		5149.64	4151.19	6248.95	4197.74	4652.98	4252.22	4775.45	6		4378.98	2810.22	3179.88	4655.34	3511.56	4224.11	3793.35	6	1.2589	0.271814	0			3473.96	3538.83	2913.37	4176.69	4970.4	3814.65	5	3657.57	3451.42	6021.69	4555.88		4618.69	3841.63	4357.81	6	0.875359	0.650458	-1
Q00955	ACC1	341	_AET[Phospho (STY)]FHEMEK_.2		2635.79	3494.92	4444.62	2920.14	2132.54	3673.91	3216.99	6		3540.2	2524.74	1234.12	1637.84	3139.74	2944.69	2503.56	6	1.28497	0.528289	0		2311.58	3163.06	2411.55	3121.82	2738.24	1949.65	2615.98	6	2571.36	4328.51	3245.8	3329.1	1494.98	3135.47	1509.31	2802.08	7	0.933587	0.87596	-1
Q00955	ACC1	1114	_AYT[Phospho (STY)]IGDIR_.2	69626.1	56828.8	60695.1	62060.7	62424.1	57128	56423.4	60740.9	7	55206.8	63181	56077.5	59706	55050	63686.2	61099.3	59143.8	7	1.027	0.791306	0	54223.7	54182.5	51054.3	53974.4	52439.9	51148.1	53322.9	52906.6	7	55461.4	72289.9	63434.3	61249.7	56943.3	61168.6	68952.2	62785.6	7	0.842654	0.0151251	0
Q00955	ACC1	1157	_AVS[Phospho (STY)]VSDLSYVANSQSSPLR_.2	358511	1.5159e+06	408671	196031	1.88005e+06	3.97282e+06	332488	1.23778e+06	7	305669	1.59028e+06	2.04648e+06	1599440	128206	162475	1.72397e+06	1.0795e+06	7	1.14662	0.93242	0	1.32347e+06	1.67163e+06	1.82007e+06	1.58443e+06	1.59219e+06	1.59647e+06	1438396	1.57524e+06	7	1.50398e+06	1.87652e+06	1.26187e+06	1757336	135842	89713.4	268766	984860	7	1.59945	0.299034	0
Q00955	ACC1	1157	_AVS[Phospho (STY)]VSDLSYVANSQSSPLR_.3	492341	225067	937438	876505	2242182	1.03312e+06	617272	917704	7	663933	574282	659190	636960	594237	782506	649724	651547	7	1.4085	0.65806	0	379182	69282.6	583588	2.38236e+06	522726	545536	855494	762595	7	796533	680197	482392	650691	410653	437090	170321	518268	7	1.47143	0.721367	0
Q00955	ACC1	1163	_AVSVSDLSY[Phospho (STY)]VANSQSSPLR_.3		63799.9			54899.3	42702.9	59475.2	55219.3	4		68781.3	74882.7	57067		40641.9		60343.2	4	0.915087	0.837012	0		57331.4	60983.3		50579.4		46386.5	53820.2	4			12013.5	65566.3	20804.5			32794.8	3	1.64112	0.515437	1
Q00955	ACC1	1448	_ALINNVS[Phospho (STY)]GYVIK_.2									0									0			0			1932.83				2953.68	2443.25	2			2728.52					2728.52	1	0.89545	0.924685	1
Q00955	ACC1	1595	_IGS[Phospho (STY)]FGPQEDEFFNK_.2	9986.66	3406.34	6782.43	2251.38	5308.3	7029.53	5302.59	5723.89	7	1642.07	12647.7	9522.14	11262.7	8620.3	10100.6	2153.51	7992.71	7	0.716139	0.61505	0	11513.3	9033.74	8969.86	8393.45	8015.6	9879.05	9254.45	9294.21	7	5628.83	12963.7	13052.7	10299.3	9382.54	6041.7	2337.66	8529.5	7	1.08965	0.847176	0
Q00955	ACC1	1625	_IYLAANS[Phospho (STY)]GAR_.2	2527.28				2352.71			2439.99	2									0			2				2371.5	2323.95	1553.73	1518.09	1941.81	4					1334.42			1334.42	1	1.45517	0.64853	3
Q00955	ACC1	1732	_S[Phospho (STY)]VGIGAYLVR_.2	12374.3		4858.88		6761.52	4850.5	3187.35	6406.52	5	3347.27	8452.76	12161.9	9210.57	8884.93	6825.82		8147.21	6	0.786345	0.734267	-1	8349.77	7458.36	5937.97	5464.05	4427.77	5752.63	7357.88	6392.63	7	15121	5655.52	7287.73	6155.87	4289.05		3728.66	7039.64	6	0.908091	0.881859	1
Q00955	ACC1	1808	_IVEWMS[Phospho (STY)]YVPAK_.2									0									0			0									0	2776.11							2776.11	1			-1
Q00955	ACC1	2062	_S[Phospho (STY)]LAPEVHQQISK_.2	25140.7	9309.73	14556.8	5678.04	13071.4	13917.9	12276.8	13421.6	7	12404.1	14894.3	16769.5	19589.2	16399.2	15215.9	6019.51	14470.2	7	0.927534	0.898281	0	25923	20380	15390.3	15451.7	11643.7	15500.4	17499.8	17398.4	7	26111.6	11794.3	15981.8	13182.4	14526.5	8771.69	11116.5	14497.8	7	1.20007	0.6293	0
Q00955	ACC1	2140	_RLS[Phospho (STY)]HQVGEASR_.3		3050.85						3050.85	1	1875.62						2915.31	2395.47	2	1.27359	0.845177	-1	4131.89							4131.89	1	3979.18						4498.79	4238.98	2	0.974737	0.945231	-1
P21192	ACE2	80	_DLDIPLVPS[Phospho (STY)]PK_.2	1.97171e+06	1672278	2.29507e+06	2.33061e+06	1.81859e+06	1659965	1.54939e+06	1.89966e+06	7	2.40885e+06	2.43118e+06	2.31949e+06	2.51952e+06	1.90097e+06	2.35531e+06	2.15135e+06	2.2981e+06	7	0.826623	0.123829	0	2.00574e+06	2.07887e+06	1.96854e+06	1.83384e+06	1.77778e+06	1.69737e+06	1.74061e+06	1.87182e+06	7	2719769	3518502	3.25238e+06	3.02775e+06	2.92591e+06	2.96065e+06	3.13716e+06	3.07745e+06	7	0.608239	1.01665e-05	0
P21192	ACE2	80	_DLDIPLVPS[Phospho (STY)]PK_.1	87143.6	27933	24776.5	23091.8	18191.2	21077.6	19543.4	31679.6	7	104000	59528.3	31581.2	26562.5	30848.8	29166.7	10831.9	41788.4	7	0.758095	0.802331	0	106108	24164.7	23117.3	23570.9	22849.6	20280.4	23251.1	34763.2	7	155100	31375.3	42004.7	38552.2	41686	32221.9	33286.7	53460.9	7	0.650254	0.692585	0
P21192	ACE2	137	_TLS[Phospho (STY)]ISSLQQSILNMSK_.2	1058.98							1058.98	1									0			1	1468.18							1468.18	1									0			1
P21192	ACE2	144	_TLSISSLQQS[Phospho (STY)]ILNM[Oxidation (M)]SK_.2									0									0			0	125624							125624	1	116338							116338	1	1.07981		0
P21192	ACE2	247	_LVSGATNS[Phospho (STY)]NS[Phospho (STY)]KPGS[Phospho (STY)]PVILK_.2	8591.65	7117.37	6798.86	9230.99	5773.46	7035.45	6169.73	7245.36	7	17643.6	8677.8		8743.79	6515.3		14506.1	11217.3	5	0.645908	0.273163	2	5469.03	5553.95	5708.55		6133.4			5716.23	4	13707.6	25482.9	18100.4	15277	20534.6	21909.6	9161.58	17739.1	7	0.322239	0.0226642	-3
P21192	ACE2	247	_LVSGATNS[Phospho (STY)]NS[Phospho (STY)]KPGS[Phospho (STY)]PVILK_.3		5793.12				5892.46		5842.79	2		7609.1		7805.34	6572.16	8169.85	14585.7	8948.43	5	0.65294	0.609803	-3					5920.16		3828.12	4874.14	2		21495.4	17714.5	16468.7	17268.8	22170.9	9254.69	17395.5	6	0.280195	0.0825805	-4
P21192	ACE2	249	_LVSGATNSNS[Phospho (STY)]KPGS[Phospho (STY)]PVILK_.3	130909	196071	156260	201956	131887	128872	124013	152852	7	189374	125476	110240	130486	114672	103501	251935	146526	7	1.04317	0.931753	0	105847	102235	100775	158976	130636	132812	97402.6	118384	7	142461	254788	185960	162081	215049	245766	179212	197902	7	0.598191	0.0116909	0
P21192	ACE2	249	_LVSGATNSNS[Phospho (STY)]KPGS[Phospho (STY)]PVILK_.2	58703.8	43062.6	42159.8	53718.4	40938.5	43494.8	44627.2	46672.2	7	104544	40424.8	35692.4	33321.6	28568.7	28766.2	81069.3	50341	7	0.927121	0.916096	0	44915.3	29769.1	34131.4	40108.5	39268.5	29702.9	32878.3	35824.8	7	64820.5	67670	53740.1	46660.5	75629.9	74939.4	52098.6	62222.7	7	0.575752	0.00274265	0
P21192	ACE2	249	_LVSGATNS[Phospho (STY)]NS[Phospho (STY)]KPGS[Phospho (STY)]PVILK_.2	8591.65	7117.37	6798.86	9230.99	5773.46	7035.45	6169.73	7245.36	7	17643.6	8677.8		8743.79	6515.3		14506.1	11217.3	5	0.645908	0.273163	2	5469.03	5553.95	5708.55		6133.4			5716.23	4	13707.6	25482.9	18100.4	15277	20534.6	21909.6	9161.58	17739.1	7	0.322239	0.0226642	-3
P21192	ACE2	249	_LVSGATNS[Phospho (STY)]NS[Phospho (STY)]KPGS[Phospho (STY)]PVILK_.3		5793.12				5892.46		5842.79	2		7609.1		7805.34	6572.16	8169.85	14585.7	8948.43	5	0.65294	0.609803	-3					5920.16		3828.12	4874.14	2		21495.4	17714.5	16468.7	17268.8	22170.9	9254.69	17395.5	6	0.280195	0.0825805	-4
P21192	ACE2	249	_LVSGATNSNS[Phospho (STY)]KPGSPVILK_.3	22495.2	25978.8	21473.5	22214.9	20424.2	22815.3	17644.8	21863.8	7		10005.9	7581.92	8694.23	8847.41	7697.34	8123.05	8491.64	6	2.57474	1.24944e-05	1	24117.6	17884.1	15355.9	21265.3	17135	16848	16282.8	18412.7	7	7526.07	9176.38	11209.9	6760.22	10998.7	10496.5	6819	8998.1	7	2.04628	0.000542778	0
P21192	ACE2	253	_LVSGATNSNS[Phospho (STY)]KPGS[Phospho (STY)]PVILK_.3	130909	196071	156260	201956	131887	128872	124013	152852	7	189374	125476	110240	130486	114672	103501	251935	146526	7	1.04317	0.931753	0	105847	102235	100775	158976	130636	132812	97402.6	118384	7	142461	254788	185960	162081	215049	245766	179212	197902	7	0.598191	0.0116909	0
P21192	ACE2	253	_LVSGATNSNS[Phospho (STY)]KPGS[Phospho (STY)]PVILK_.2	58703.8	43062.6	42159.8	53718.4	40938.5	43494.8	44627.2	46672.2	7	104544	40424.8	35692.4	33321.6	28568.7	28766.2	81069.3	50341	7	0.927121	0.916096	0	44915.3	29769.1	34131.4	40108.5	39268.5	29702.9	32878.3	35824.8	7	64820.5	67670	53740.1	46660.5	75629.9	74939.4	52098.6	62222.7	7	0.575752	0.00274265	0
P21192	ACE2	253	_LVSGATNS[Phospho (STY)]NS[Phospho (STY)]KPGS[Phospho (STY)]PVILK_.2	8591.65	7117.37	6798.86	9230.99	5773.46	7035.45	6169.73	7245.36	7	17643.6	8677.8		8743.79	6515.3		14506.1	11217.3	5	0.645908	0.273163	2	5469.03	5553.95	5708.55		6133.4			5716.23	4	13707.6	25482.9	18100.4	15277	20534.6	21909.6	9161.58	17739.1	7	0.322239	0.0226642	-3
P21192	ACE2	253	_LVSGATNS[Phospho (STY)]NS[Phospho (STY)]KPGS[Phospho (STY)]PVILK_.3		5793.12				5892.46		5842.79	2		7609.1		7805.34	6572.16	8169.85	14585.7	8948.43	5	0.65294	0.609803	-3					5920.16		3828.12	4874.14	2		21495.4	17714.5	16468.7	17268.8	22170.9	9254.69	17395.5	6	0.280195	0.0825805	-4
P21192	ACE2	253	_PGS[Phospho (STY)]PVILK_.2	1445.62	2889.96	1740.78	2404.04	2843.55	2654.91	2753.48	2390.33	7	2106.78	3193.74	3365.48	3921.48	3635.17	3293.63	5636.22	3593.21	7	0.665236	0.155263	0	2358.07	2305.51	2380.67	2749.93	2506.09	3012.41	2100.27	2487.56	7	1655.74	5162.09	5171.45	5227.07	4152.13	4862.15	4246	4353.81	7	0.571354	0.0272711	0
P21192	ACE2	253	_LVSGATNSNSKPGS[Phospho (STY)]PVILK_.3	16756.7	4775.33			14284.4	8081.91	6142.52	10008.2	5	6753.06	25524.6	30927.1	40578.9	29547.1		5996.15	23221.2	6	0.430994	0.339483	-1	19732.5	17540.3	16449.8	13019.1	9220.39	14581.1	18231.9	15539.3	7	12852.3	18806.8	33965.8	36182.4	18253.2	11271.9	4629.86	19423.2	7	0.800038	0.716711	0
P21192	ACE2	299	_MSNTS[Phospho (STY)]INGS[Phospho (STY)]PSR_.2	6275.38	2736.48	4325.2			2952.65	2194.89	3696.92	5	13186.1	6588.9	6563	5589.34	5233.66	6081.67	6605.63	7121.19	7	0.519143	0.199096	-2	5006.7	4094.23	2993.59	3547.43		2821.37	2207.32	3445.11	6	10728	9434.99	8671.17	9979.55	6359.4	8316.98	2437.27	7989.63	7	0.431198	0.0326606	-1
P21192	ACE2	299	_MSNTS[Phospho (STY)]INGSPSR_.2	7968.53		3296.01	1611.92	2586.98	2409.72	2159.3	3338.74	6		1708		1445.33	1899.17			1684.17	3	1.98243	0.632914	3	9604.61	2479.23					2772.19	4952.01	3			3134.39	3356				3245.19	2	1.52595	0.832859	1
P21192	ACE2	299	_M[Oxidation (M)]SNTS[Phospho (STY)]INGS[Phospho (STY)]PSR_.2	692.008							692.008	1							3285.08	3285.08	1	0.210652		0									0			1281.73					1281.73	1			-1
P21192	ACE2	303	_M[Oxidation (M)]SNTSINGS[Phospho (STY)]PSR_.2					5152.44	4850.88	4212.03	4738.45	3	13746.8	13461.1						13604	2	0.348315	0.00396042	1	5285.53			3697.88	4397.82	5311.62		4673.21	4	13685.2		18319.2		22017.7			18007.4	3	0.259517	0.0160046	1
P21192	ACE2	303	_MSNTS[Phospho (STY)]INGS[Phospho (STY)]PSR_.2	6275.38	2736.48	4325.2			2952.65	2194.89	3696.92	5	13186.1	6588.9	6563	5589.34	5233.66	6081.67	6605.63	7121.19	7	0.519143	0.199096	-2	5006.7	4094.23	2993.59	3547.43		2821.37	2207.32	3445.11	6	10728	9434.99	8671.17	9979.55	6359.4	8316.98	2437.27	7989.63	7	0.431198	0.0326606	-1
P21192	ACE2	303	_MSNTSINGS[Phospho (STY)]PSR_.2	3661.42	19314.4	22913.4		22539.4	22533.4	20647.5	18601.6	6	6854.89	3217.77	50978.3	52396.5	45292.2	51043.7	59900.1	38526.2	7	0.482829	0.322074	-1		24237.4		28440.2			22502.7	25060.1	3	112480	5816.67	89163	75792.3	69387.4	82913.6	17682.6	64747.9	7	0.387041	0.393246	-4
P21192	ACE2	303	_M[Oxidation (M)]SNTS[Phospho (STY)]INGS[Phospho (STY)]PSR_.2	692.008							692.008	1							3285.08	3285.08	1	0.210652		0									0			1281.73					1281.73	1			-1
P21192	ACE2	305	_MSNTSINGSPS[Phospho (STY)]R_.2									0									0			0			31843.5		31889			31866.3	2									0			2
P21192	ACE2	305	_M[Oxidation (M)]SNTSINGSPS[Phospho (STY)]R_.2		5265.44						5265.44	1									0			1									0		20278.9		18726.9				19502.9	2			-2
P21192	ACE2	385	_TS[Phospho (STY)]PGGLSISPR_.2	51867.8	38864.9		44993	39917.4	36393.5	36257.2	41382.3	6	82145.3	86884.4	78327.6	90469	66380.1	80490.3	88709.3	81915.1	7	0.505185	5.84125e-05	-1	48568	44997.4	47325	47045.3	45093	46226.2	43985.2	46177.1	7	117985	141213	142827	139674	115687	124219	135798	131058	7	0.352342	5.63666e-08	0
P21192	ACE2	385	_TS[Phospho (STY)]PGGLSIS[Phospho (STY)]PR_.2	31952	23680.8		31438.3		23897.9	23358.6	26865.5	5	47765.1	49564.4	47354.2	49192.3	38515.6	46854.3	52783.8	47432.8	7	0.566391	0.000538423	-2	29025.3		28909			27823.9		28586	3	58186.6	85134.1	72231.8			64869	81114.2	72307.1	5	0.395342	0.00830491	-2
P21192	ACE2	390	_TSPGGLS[Phospho (STY)]IS[Phospho (STY)]PR_.2	11264.9	6895.86	9833.03	7770.3	8469.28	6927.7	8533.39	8527.78	7	1978.28	3273.84		3783.73		2403.7	2350.81	2758.07	5	3.09194	0.000794497	2	9479.7	6930.46	6027.2	7888.57	5136.09	8372.54	6219.23	7150.54	7	3069.97	4318.84		4543.48	3487.09			3854.84	4	1.85495	0.0293899	3
P21192	ACE2	392	_TSPGGLSIS[Phospho (STY)]PR_.2	173502	133788	157639	147993	152272	133811	115863	144981	7	294172	243230	223979	226633	186306	229985	260979	237897	7	0.609427	0.00121284	0	148366	134919	117964	154084	122715	133889	124947	133840	7	287465	322959	266681	305014	284060	261644	315692	291931	7	0.458466	4.03113e-07	0
P21192	ACE2	392	_TS[Phospho (STY)]PGGLSIS[Phospho (STY)]PR_.2	31952	23680.8		31438.3		23897.9	23358.6	26865.5	5	47765.1	49564.4	47354.2	49192.3	38515.6	46854.3	52783.8	47432.8	7	0.566391	0.000538423	-2	29025.3		28909			27823.9		28586	3	58186.6	85134.1	72231.8			64869	81114.2	72307.1	5	0.395342	0.00830491	-2
P21192	ACE2	392	_TSPGGLS[Phospho (STY)]IS[Phospho (STY)]PR_.2	11264.9	6895.86	9833.03	7770.3	8469.28	6927.7	8533.39	8527.78	7	1978.28	3273.84		3783.73		2403.7	2350.81	2758.07	5	3.09194	0.000794497	2	9479.7	6930.46	6027.2	7888.57	5136.09	8372.54	6219.23	7150.54	7	3069.97	4318.84		4543.48	3487.09			3854.84	4	1.85495	0.0293899	3
P21192	ACE2	402	_S[Phospho (STY)]PFLVGTDK_.2	17390.4	15963.9	22692.2	24182.5	22153.3	19734.7	14854.6	19567.4	7	18994.1	11712.1	11555.9	10497.1	10032	12401.6	19067.2	13465.7	7	1.45312	0.0906115	0	10448.2	17649.5	14363.3	16681.2	14588.8	14028.6	13292.1	14436	7	19840.1	23927	17621.6	24070	23818	24262.9	16971.8	21501.6	7	0.671389	0.00783984	0
P21192	ACE2	422	_YAAGTFT[Phospho (STY)]PR_.2	33750.5	27500.8	29858	35609.5	26903.4	24863.6	21857.7	28620.5	7	26970.7	14683.1		12020.9	15132.4	19117.1	27245.6	19195	6	1.49104	0.104633	1	33467.7	22244	18698.7	24260.1	23421.9	20462.2	21569.3	23446.3	7	37641.2	30436.8	26723.2	24205.8	28109.6	30837.2	38447.5	30914.5	7	0.758423	0.112179	0
P21192	ACE2	428	_TQLS[Phospho (STY)]PIHK_.2	103703			72228.6	52654.2	53137.5	42661.6	64877	5	323330	11809.6	100459	103739	94661.6	10833.7	194590	119918	7	0.541013	0.657556	-2	92413.1	49304.5	55641		76459.9	60639.8	54588	64841.1	6	209665	9540.03	186094	184329	169495	201965	293261	179193	7	0.361851	0.0642215	-1
P21192	ACE2	428	_TQLS[Phospho (STY)]PIHK_.1									0	1686.12						295.57	990.846	2			-2									0	928.178							928.178	1			-1
P21192	ACE2	482	_NANALASSSVLPPIPGS[Phospho (STY)]SNNT[Phospho (STY)]PIK_.3	89831.6	52769.3	71359.3	71836.8	64453.5	57289.2		67923.3	6	210055	170646	141420	153528		131429	147059	159023	6	0.427129	0.00109213	0	101905	65432.4	66470.4		66162.9	56748		71343.8	5	252003	242349	203822	206862	205695	218559	191644	217276	7	0.328355	1.45743e-05	-2
P21192	ACE2	482	_NANALASSSVLPPIPGS[Phospho (STY)]SNNT[Phospho (STY)]PIK_.2		18534.7						18534.7	1	66629.6			35098.4		24595.6		42107.8	3	0.440172	0.766359	-2	30437.6	17657.2		17291.1				21795.3	3		46584		44690.2		59456.2	64737.1	53866.9	4	0.404614	0.0470055	-1
P21192	ACE2	483	_NANALASSSVLPPIPGSS[Phospho (STY)]NNT[Phospho (STY)]PIK_.3									0					93878.8			93878.8	1			-1									0									0			0
P21192	ACE2	486	_NANALASSSVLPPIPGS[Phospho (STY)]SNNT[Phospho (STY)]PIK_.3	89831.6	52769.3	71359.3	71836.8	64453.5	57289.2		67923.3	6	210055	170646	141420	153528		131429	147059	159023	6	0.427129	0.00109213	0	101905	65432.4	66470.4		66162.9	56748		71343.8	5	252003	242349	203822	206862	205695	218559	191644	217276	7	0.328355	1.45743e-05	-2
P21192	ACE2	486	_NANALASSSVLPPIPGS[Phospho (STY)]SNNT[Phospho (STY)]PIK_.2		18534.7						18534.7	1	66629.6			35098.4		24595.6		42107.8	3	0.440172	0.766359	-2	30437.6	17657.2		17291.1				21795.3	3		46584		44690.2		59456.2	64737.1	53866.9	4	0.404614	0.0470055	-1
P21192	ACE2	486	_NANALASSSVLPPIPGSS[Phospho (STY)]NNT[Phospho (STY)]PIK_.3									0					93878.8			93878.8	1			-1									0									0			0
P21192	ACE2	501	_HVFQHT[Phospho (STY)]PVK_.2							116.339	116.339	1	5402.66		709.416					3056.04	2	0.0380685	0.845868	-1	5786.56						1087.95	3437.25	2	16139.1						10604.1	13371.6	2	0.257056	0.369906	0
P21192	ACE2	501	_HVFQHT[Phospho (STY)]PVK_.3									0	2599.99		281.339				3256.17	2045.83	3			-3	3966.03						200.017	2083.02	2	8420.48						8311.7	8366.09	2	0.248984	0.303424	0
P21192	ACE2	557	_S[Phospho (STY)]PTLHSTS[Phospho (STY)]PLPDEIIPR_.3	129319							129319	1									0			1		144643						144643	1	171652		256866			294990	289352	253215	4	0.571226	0.492535	-3
P21192	ACE2	557	_S[Phospho (STY)]PTLHSTS[Phospho (STY)]PLPDEIIPR_.2	84341	85911.1	111665	95700.4	89908.4		78478	91000.6	6	128832	108069		97563.3	75733.4	93723.5	131718	105940	6	0.858985	0.508636	0	70142.6	91011.5	87404.7	76480.2			69335.9	78875	5	111295	173594	139860	150311				143765	4	0.548638	0.0148611	1
P21192	ACE2	557	_S[Phospho (STY)]PT[Phospho (STY)]LHSTSPLPDEIIPR_.3		150885						150885	1		163446	167626		145265			158779	3	0.95028	0.856299	-2			142262					142262	1					243743			243743	1	0.583656		0
P21192	ACE2	557	_S[Phospho (STY)]PTLHSTSPLPDEIIPR_.3	29665.8					36322.2		32994	2	153292	104103	120153	122110	106530	87605.5	136325	118588	7	0.278223	0.0181856	-5									0	134655	94798.7	124703	108320	154999	150433	160498	132629	7			-7
P21192	ACE2	557	_S[Phospho (STY)]PTLHSTSPLPDEIIPR_.2									0	63354.1	29084.1	30346.3				31034	38454.6	4			-4	14455.7	7337.66	9776.75				8321.24	9972.83	4	48887.9	20644.8	36389.1	26139.8		45096	43552.2	36785	6	0.271112	0.0207877	-2
P21192	ACE2	559	_S[Phospho (STY)]PT[Phospho (STY)]LHSTSPLPDEIIPR_.3		150885						150885	1		163446	167626		145265			158779	3	0.95028	0.856299	-2			142262					142262	1					243743			243743	1	0.583656		0
P21192	ACE2	563	_SPTLHST[Phospho (STY)]S[Phospho (STY)]PLPDEIIPR_.2		131090						131090	1			45008.3	26823.7				35916	2	3.6499	0.396873	-1									0									0			0
P21192	ACE2	563	_SPTLHST[Phospho (STY)]SPLPDEIIPR_.3	27334.4				26271			26802.7	2									0			2									0									0			0
P21192	ACE2	564	_S[Phospho (STY)]PTLHSTS[Phospho (STY)]PLPDEIIPR_.3	129319							129319	1									0			1		144643						144643	1	171652		256866			294990	289352	253215	4	0.571226	0.492535	-3
P21192	ACE2	564	_S[Phospho (STY)]PTLHSTS[Phospho (STY)]PLPDEIIPR_.2	84341	85911.1	111665	95700.4	89908.4		78478	91000.6	6	128832	108069		97563.3	75733.4	93723.5	131718	105940	6	0.858985	0.508636	0	70142.6	91011.5	87404.7	76480.2			69335.9	78875	5	111295	173594	139860	150311				143765	4	0.548638	0.0148611	1
P21192	ACE2	564	_SPTLHST[Phospho (STY)]S[Phospho (STY)]PLPDEIIPR_.2		131090						131090	1			45008.3	26823.7				35916	2	3.6499	0.396873	-1									0									0			0
P21192	ACE2	564	_SPTLHSTS[Phospho (STY)]PLPDEIIPR_.2							7792.04	7792.04	1									0			1	22271.4		8254.78				12028.7	14185	3									0			3
P21192	ACE2	709	_SLLDS[Phospho (STY)]PHDTS[Phospho (STY)]PVK_.2	35481.5	43997.4	42149.7	38965.4	37689.7	35572.7	35327.5	38454.8	7	81746.2	102297	97423.2	111659	89678.1	105554	112243	100086	7	0.384219	2.7525e-06	0	34620.7	38531	40195.4	47637.4	40292.6	44865.7	41408.7	41078.8	7	66077.9	154010	125399	151160	124435	138789	136916	128113	7	0.320646	0.000184464	0
P21192	ACE2	709	_SLLDS[Phospho (STY)]PHDTS[Phospho (STY)]PVK_.3							8485.99	8485.99	1	25287.5	32468.1	37347.6		23804.8	40369.5	37009.3	32714.5	6	0.259396	0.155154	-5				15671		11867.5		13769.3	2	23082.4	46547.5	44831.1	42033.2	35724.8	39765.8	30877	37551.7	7	0.366675	0.055219	-5
P21192	ACE2	709	_SLLDS[Phospho (STY)]PHDT[Phospho (STY)]SPVKETIAR_.2									0						1586.53		1586.53	1			-1									0									0			0
P21192	ACE2	709	_SLLDS[Phospho (STY)]PHDTSPVK_.3	161698	189417	176191	196118	168067	162761	150155	172058	7	22677.2	29076.2	28624	31687.5	29095.3	28703.4	26400.9	28037.8	7	6.13665	5.2049e-08	0	177448	167246	170662	150187	156827	151143	176749	164323	7	22128.8	23322.9	32530.1	25925.3	21902	24218.4	22654.1	24668.8	7	6.66117	1.19202e-09	0
P21192	ACE2	709	_SLLDS[Phospho (STY)]PHDTSPVK_.2	91304.6	65326.1	71328.6	68787.5	68318.1	63177.1	57764.9	69429.6	7	14367.3	11093.5	10760	13140	10419.7	11536.2	7897.19	11316.3	7	6.13538	2.14e-06	0	102071	58041	59765	56851	52913.3	56159.1	63739.8	64220	7	13246.8			8800.61	8331.44	9389.41	8774.73	9708.59	5	6.61476	0.000835499	2
P21192	ACE2	709	_SLLDS[Phospho (STY)]PHDTS[Phospho (STY)]PVKETIAR_.2									0	15314.6			2953.28				9133.96	2			-2									0	30301.8			3462.37		2215.81	10649.4	11657.3	4			-4
P21192	ACE2	709	_SLLDS[Phospho (STY)]PHDTS[Phospho (STY)]PVKETIAR_.3									0	36362.1							36362.1	1			-1									0	74781.6						50664.2	62722.9	2			-2
P21192	ACE2	713	_SLLDS[Phospho (STY)]PHDT[Phospho (STY)]SPVKETIAR_.2									0						1586.53		1586.53	1			-1									0									0			0
P21192	ACE2	713	_SLLDSPHDT[Phospho (STY)]S[Phospho (STY)]PVKETIAR_.2	1145.62							1145.62	1			1336.47					1336.47	1	0.857202		0	2461.29					188.517		1324.9	2									0			2
P21192	ACE2	714	_SLLDS[Phospho (STY)]PHDTS[Phospho (STY)]PVK_.2	35481.5	43997.4	42149.7	38965.4	37689.7	35572.7	35327.5	38454.8	7	81746.2	102297	97423.2	111659	89678.1	105554	112243	100086	7	0.384219	2.7525e-06	0	34620.7	38531	40195.4	47637.4	40292.6	44865.7	41408.7	41078.8	7	66077.9	154010	125399	151160	124435	138789	136916	128113	7	0.320646	0.000184464	0
P21192	ACE2	714	_SLLDS[Phospho (STY)]PHDTS[Phospho (STY)]PVK_.3							8485.99	8485.99	1	25287.5	32468.1	37347.6		23804.8	40369.5	37009.3	32714.5	6	0.259396	0.155154	-5				15671		11867.5		13769.3	2	23082.4	46547.5	44831.1	42033.2	35724.8	39765.8	30877	37551.7	7	0.366675	0.055219	-5
P21192	ACE2	714	_SLLDSPHDTS[Phospho (STY)]PVK_.3	1426.78	2479.36						1953.07	2	10432.8		13014.9	15109.7	12920.5	13199.6	12146.4	12804	6	0.152536	0.00238906	-4						3454.55		3454.55	1			15733.2	13384.3	12863		12816.1	13699.2	4	0.252173	0.0575647	-3
P21192	ACE2	714	_SLLDSPHDTS[Phospho (STY)]PVK_.2									0	33514.9	21441.4	26517.6	27094.1	22689.6	24024.1	25859.4	25877.3	7			-7	4635.06	7364	9214.94		6583.97	6627.02	8451.21	7146.03	6	20582.8	22381.6	30524.8	24844.1		25762.6	23334.9	24571.8	6	0.290823	2.73218e-05	0
P21192	ACE2	714	_SLLDS[Phospho (STY)]PHDTS[Phospho (STY)]PVKETIAR_.2									0	15314.6			2953.28				9133.96	2			-2									0	30301.8			3462.37		2215.81	10649.4	11657.3	4			-4
P21192	ACE2	714	_SLLDS[Phospho (STY)]PHDTS[Phospho (STY)]PVKETIAR_.3									0	36362.1							36362.1	1			-1									0	74781.6						50664.2	62722.9	2			-2
P21192	ACE2	714	_SLLDSPHDT[Phospho (STY)]S[Phospho (STY)]PVKETIAR_.2	1145.62							1145.62	1			1336.47					1336.47	1	0.857202		0	2461.29					188.517		1324.9	2									0			2
Q12168	ACF2	61	_TPSS[Phospho (STY)]SNPLADSQVNSDNIFQSPVLSNLK_.3			98588					98588	1									0			1		70813.2						70813.2	1									0			1
Q12168	ACF2	78	_TPSSSNPLADSQVNSDNIFQS[Phospho (STY)]PVLSNLK_.3		2834.77	2688.53		3314.58	3702.64	3079.76	3124.06	5	2911.07	2726.56	2614.45		3529.98	2422.5	3541.3	2957.64	6	1.05627	0.822475	-1	2396.14	2653.65	1984.01	1903.37	2433.89	2502.32	2347.72	2317.3	7	3411.4	3933.42	2771.73		3645.38	3750.7	3562.14	3512.46	6	0.659737	0.00119627	1
P47129	ACF4	9	_VIS[Phospho (STY)]QPIELHK_.2	317167	463858	330183	374150	335432	308468	327502	350966	7	2403.83	2343.6	1726.05	1836.52	1856.53	1721.34	2208.02	2013.7	7	174.289	5.24935e-07	0	348315	264080	261102	248902	243847	254832	293941	273574	7	4897.56	1100.17	2695.7	2869.2	3172.4	2715.74	3808.71	3037.07	7	90.0783	5.33744e-08	0
P47129	ACF4	9	_VIS[Phospho (STY)]QPIELHK_.3	1802.3	479.511						1140.9	2						1.22265		1.22265	1	933.141	0.796736	1	1393.54							1393.54	1									0			1
P47129	ACF4	49	_VTT[Phospho (STY)]PLKPK_.2	684942	424490	439166		393628	397942	371160	451888	6	387374	116881	461547	175821	378689	52436.6	224403	256736	7	1.76013	0.181477	-1	448053	273617	323695	434704	59533.5	383132		320456	6	549196	499634	114277	92418.6	355700		252008	310539	6	1.03193	0.971421	0
P47129	ACF4	49	_VTT[Phospho (STY)]PLKPK_.1	44638.8	3488.82	4885.63	6156.77	4665.79		6346.28	11697	6	26307.8	7876.24			4483.45	5477.07	10334.6	10895.8	5	1.07353	0.976245	1	8915.61	4317.4	6404.09	5129.7	5870.46	6422.81	6202.47	6180.36	7	44136	11378.9	10429.3	10472	4810.98	9404.61	7610.13	14034.6	7	0.440367	0.435986	0
P47129	ACF4	61	_LAIPIS[Phospho (STY)]S[Phospho (STY)]PQR_.2	37733.8	39229.7	29060.1	53381.7	32071.2	34039.6	34549.8	37152.3	7	14354.8	9573.98	7620.72	8899.37	6938.82	8090.48	16372.5	10264.4	7	3.61953	0.000178364	0	25309	30401	29931.5	37545.4	36173.7	34740	26811.8	31558.9	7	13999.1	21963.5	16021.6	11998.5	15514.3	19824.4	19533.4	16979.3	7	1.85867	0.000686596	0
P47129	ACF4	62	_LAIPISS[Phospho (STY)]PQR_.2	2.06915e+06	2.46716e+06	2.25371e+06	3.08833e+06	2.15955e+06	2.14135e+06	1.93549e+06	2.30211e+06	7	3.60623e+06	1492797	1.42463e+06	1.42399e+06	1.42974e+06	1.51493e+06	1.37072e+06	1.75186e+06	7	1.31409	0.455684	0	1.5789e+06	1630776	1.35526e+06	2.30184e+06	1.98971e+06	1.63277e+06	1.46335e+06	1.70752e+06	7	2.34952e+06	81055	2.11366e+06	1780531	2.46434e+06	2.91112e+06	3.28908e+06	2.14133e+06	7	0.797408	0.6293	0
P47129	ACF4	62	_LAIPISS[Phospho (STY)]PQR_.1						21768.5		21768.5	1	170557						45913.9	108235	2	0.201122	0.830961	-1									0									0			0
P47129	ACF4	62	_LAIPIS[Phospho (STY)]S[Phospho (STY)]PQR_.2	37733.8	39229.7	29060.1	53381.7	32071.2	34039.6	34549.8	37152.3	7	14354.8	9573.98	7620.72	8899.37	6938.82	8090.48	16372.5	10264.4	7	3.61953	0.000178364	0	25309	30401	29931.5	37545.4	36173.7	34740	26811.8	31558.9	7	13999.1	21963.5	16021.6	11998.5	15514.3	19824.4	19533.4	16979.3	7	1.85867	0.000686596	0
P47129	ACF4	71	_STTNQS[Phospho (STY)]PVS[Phospho (STY)]DHASPISTDQDLIYK_.3	119687	156257	169851	166958	154122	142938	141834	150235	7	74833.6	94402.4	104430	116196	103290	101180	94914.7	98463.6	7	1.52579	0.00118344	0	77135.6	119740	139085	123185	127545	122008	117389	118013	7	81696.9	107841	105223	80834.1	86925.9	98991	94589.8	93728.9	7	1.25908	0.0935941	0
P47129	ACF4	71	_STTNQS[Phospho (STY)]PVS[Phospho (STY)]DHASPISTDQDLIYK_.2									0									0			0	15526	4164.53	6987.28		3978.67		6129.29	7357.17	5		3761.95						3761.95	1	1.95568	0.787489	4
P47129	ACF4	71	_STTNQS[Phospho (STY)]PVS[Phospho (STY)]DHAS[Phospho (STY)]PISTDQDLIYK_.3	101907	103628	125883	125250	109201	97141.1	88898.9	107416	7	107382	106984	138381	136219	113883	145987	117327	123738	7	0.868092	0.306595	0	76521.6	90700.7	97091.1	114583	93601.3	97703.3	83291.6	93356.1	7	88624.1	167602	161072	115041	115017	141863	111653	128696	7	0.7254	0.0823074	0
P47129	ACF4	71	_STTNQS[Phospho (STY)]PVSDHASPISTDQDLIYK_.3	21879.4	58869.9	58531.8	55610.1	60309.5	57476	52535.1	52173.1	7	31644.8	33545.9	46491.9	51244.2	44862.5	38544.7	36665.3	40428.5	7	1.2905	0.311008	0	32262.1	47265.5	54272.3	41982.7	40261.8	40315.7	52755.7	44159.4	7	39512	28612.4	35953.5	32236.3	47462.3	38786.1	38317.5	37268.6	7	1.1849	0.320091	0
P47129	ACF4	71	_STTNQS[Phospho (STY)]PVSDHAS[Phospho (STY)]PISTDQDLIYK_.3	15676.3		19436.3		18293.3		12316.9	16430.7	4	13694				14425.5			14059.8	2	1.16863	0.718064	2	15584.2	13394.2	13767.7	13701.3	13869.2	10769.6	13907	13570.5	7	14966					16218.2		15592.1	2	0.870342	0.358721	5
P47129	ACF4	74	_STTNQS[Phospho (STY)]PVS[Phospho (STY)]DHASPISTDQDLIYK_.3	119687	156257	169851	166958	154122	142938	141834	150235	7	74833.6	94402.4	104430	116196	103290	101180	94914.7	98463.6	7	1.52579	0.00118344	0	77135.6	119740	139085	123185	127545	122008	117389	118013	7	81696.9	107841	105223	80834.1	86925.9	98991	94589.8	93728.9	7	1.25908	0.0935941	0
P47129	ACF4	74	_STTNQS[Phospho (STY)]PVS[Phospho (STY)]DHASPISTDQDLIYK_.2									0									0			0	15526	4164.53	6987.28		3978.67		6129.29	7357.17	5		3761.95						3761.95	1	1.95568	0.787489	4
P47129	ACF4	74	_STTNQS[Phospho (STY)]PVS[Phospho (STY)]DHAS[Phospho (STY)]PISTDQDLIYK_.3	101907	103628	125883	125250	109201	97141.1	88898.9	107416	7	107382	106984	138381	136219	113883	145987	117327	123738	7	0.868092	0.306595	0	76521.6	90700.7	97091.1	114583	93601.3	97703.3	83291.6	93356.1	7	88624.1	167602	161072	115041	115017	141863	111653	128696	7	0.7254	0.0823074	0
P47129	ACF4	74	_STTNQSPVS[Phospho (STY)]DHAS[Phospho (STY)]PISTDQDLIYK_.3	17628.2	11173.6	12015.9	12420.4	11066.7	12015.8	12821.9	12734.6	7	14090.4	12995.7	14839.1	18077.9	14497.6	15256.3	12661.4	14631.2	7	0.870376	0.400563	0	14870.1	10207.2	16143	10840.3	11493.7	11867.5	9184.65	12086.7	7	15535.5	17892.7	19163.7	15594.6	13930.8	17554.9	16244.4	16559.5	7	0.729891	0.0247129	0
P47129	ACF4	74	_STTNQSPVS[Phospho (STY)]DHASPISTDQDLIYK_.3	10238.8		10389.2	11311.1	10833		10831.3	10720.7	5		10455	10983.9	12936.3		8979.92	10466.3	10764.3	5	0.995951	0.98459	0		11293.5	13211.1	7281.61	10112.1	9825.75	13256.8	10830.1	6		8060.88	10144.3	10480.9	14386.6	11290.6		10872.7	5	0.996089	0.990511	1
P47129	ACF4	78	_STTNQS[Phospho (STY)]PVS[Phospho (STY)]DHAS[Phospho (STY)]PISTDQDLIYK_.3	101907	103628	125883	125250	109201	97141.1	88898.9	107416	7	107382	106984	138381	136219	113883	145987	117327	123738	7	0.868092	0.306595	0	76521.6	90700.7	97091.1	114583	93601.3	97703.3	83291.6	93356.1	7	88624.1	167602	161072	115041	115017	141863	111653	128696	7	0.7254	0.0823074	0
P47129	ACF4	78	_STTNQS[Phospho (STY)]PVSDHAS[Phospho (STY)]PISTDQDLIYK_.3	15676.3		19436.3		18293.3		12316.9	16430.7	4	13694				14425.5			14059.8	2	1.16863	0.718064	2	15584.2	13394.2	13767.7	13701.3	13869.2	10769.6	13907	13570.5	7	14966					16218.2		15592.1	2	0.870342	0.358721	5
P47129	ACF4	78	_STTNQSPVS[Phospho (STY)]DHAS[Phospho (STY)]PISTDQDLIYK_.3	17628.2	11173.6	12015.9	12420.4	11066.7	12015.8	12821.9	12734.6	7	14090.4	12995.7	14839.1	18077.9	14497.6	15256.3	12661.4	14631.2	7	0.870376	0.400563	0	14870.1	10207.2	16143	10840.3	11493.7	11867.5	9184.65	12086.7	7	15535.5	17892.7	19163.7	15594.6	13930.8	17554.9	16244.4	16559.5	7	0.729891	0.0247129	0
P47129	ACF4	78	_STTNQSPVSDHAS[Phospho (STY)]PISTDQDLIYK_.3						8988.1		8988.1	1									0			1									0	10048.9						9012.37	9530.63	2			-2
P47129	ACF4	81	_STTNQSPVSDHASPIS[Phospho (STY)]T[Phospho (STY)]DQDLIYK_.2				11559				11559	1	12265.7			10198.3			10185.4	10883.1	3	1.0621	0.880533	-2									0	9989.97						6683.9	8336.94	2			-2
P47129	ACF4	82	_STTNQSPVSDHASPIS[Phospho (STY)]T[Phospho (STY)]DQDLIYK_.2				11559				11559	1	12265.7			10198.3			10185.4	10883.1	3	1.0621	0.880533	-2									0	9989.97						6683.9	8336.94	2			-2
P47129	ACF4	149	_IQQT[Phospho (STY)]FVDVNNS[Phospho (STY)]PNMLK_.2			6148.66		5176.37	3392.27	2667.92	4346.31	4		13059.5	12340.7	13994.9	12006.4	21673.6	1424.13	12416.5	6	0.350042	0.239506	-2		9579.8	10410.9	3293.42	2684.32	7019.14	9311.24	7049.81	6		1886.43	11245.4	18776.7	15041.8	3712.94		10132.7	5	0.695751	0.683231	1
P47129	ACF4	156	_IQQTFVDVNNS[Phospho (STY)]PNMLK_.2	11988.4	5004.18	3802.68	5794.47	5031.43	6997.03	4871.64	6212.83	7	10990.2			3638.34	2197.69		4968	5448.56	4	1.14027	0.894606	3	11480.4	4188.04	3990.59	6407.25	6503.7	4131.83	3584.92	5755.25	7	9954.78	6013	4490.6	3547.09	5777.15	6216.55	8825.87	6403.58	7	0.898755	0.849601	0
P47129	ACF4	156	_IQQT[Phospho (STY)]FVDVNNS[Phospho (STY)]PNMLK_.2			6148.66		5176.37	3392.27	2667.92	4346.31	4		13059.5	12340.7	13994.9	12006.4	21673.6	1424.13	12416.5	6	0.350042	0.239506	-2		9579.8	10410.9	3293.42	2684.32	7019.14	9311.24	7049.81	6		1886.43	11245.4	18776.7	15041.8	3712.94		10132.7	5	0.695751	0.683231	1
P47129	ACF4	165	_S[Phospho (STY)]INDFFSK_.2	178176	381309	364694	482594	336171	355243	334140	347475	7	211822	223700	251402	239244	191698	276993	422760	259660	7	1.33819	0.327929	0	60386.6	248519	279406	263277	272415	244161	202619	224398	7	87713.6	277214	226203	236015	250769	326358	266513	238684	7	0.940148	0.893418	0
P47129	ACF4	165	_S[Phospho (STY)]INDFFSK_.1	23593.7	13734.9	14344.8	15431	13198.3	14290.3	10859.2	15064.6	7	21510.6	14402.1	8016.29	10180.5	7107.01	8807.31	18421.1	12635	7	1.19229	0.713653	0	5455.07	9765.97	10688	5125.29	9769.64	5579.83	8459.21	7834.72	7	6157.61	11021.7	7555.79	3373.22	5886.53	7008.93	6165.85	6738.52	7	1.16268	0.703039	0
P47129	ACF4	165	_S[Phospho (STY)]INDFFSKPNNNVNSNINNTLPNR_.3	39129.3	142721	91816.2	79405.8	113456	116765	122733	100861	7	75594.2	57345.2	99549.2	82422.8	65878.8	61828	102249	77838.2	7	1.29578	0.466715	0	39965.2	72716.5	91422.3	62162.7	66335.4	64585.1	93577.4	70109.3	7	59800.5	41902.9	42679.7	42665.6	112371	86729.6	48267.1	62059.5	7	1.12971	0.789364	0
P47129	ACF4	206	_MQNIAPS[Phospho (STY)]R_.2	7090.31	2186.9	2931.79	2731.34	2639.66	2109.64	2523.42	3173.3	7	1149.17							1149.17	1	2.76139	0.675824	6	5456.37	3154.23	2157.96		2198.3			3241.71	4									0			4
P47129	ACF4	208	_S[Phospho (STY)]SES[Phospho (STY)]TPTSGPPLLPPR_.2									0									0			0			107785		82960.5			95372.9	2		152941		152476		135399		146939	3	0.649066	0.133041	-1
P47129	ACF4	208	_S[Phospho (STY)]SEST[Phospho (STY)]PTSGPPLLPPR_.2									0									0			0						93832.7		93832.7	1									0			1
P47129	ACF4	209	_SS[Phospho (STY)]ESTPTSGPPLLPPR_.2					831474			831474	1	1.26841e+06	969137						1.11877e+06	2	0.743203	0.777989	-1	752732	822125	858180			759381	689208	776325	5					967346			967346	1	0.802531	0.248344	4
P47129	ACF4	211	_S[Phospho (STY)]SES[Phospho (STY)]TPTSGPPLLPPR_.2									0									0			0			107785		82960.5			95372.9	2		152941		152476		135399		146939	3	0.649066	0.133041	-1
P47129	ACF4	212	_S[Phospho (STY)]SEST[Phospho (STY)]PTSGPPLLPPR_.2									0									0			0						93832.7		93832.7	1									0			1
P47129	ACF4	239	_NANTTATAGENT[Phospho (STY)]PFLQR_.2	30414.2	42921	46132.1	43546.6	40116.4	40757.8	33170.5	39579.8	7	37925.7	32707.6	40012.3	45333.7	37066.2	40454.3	39412.4	38987.5	7	1.01519	0.942412	0	26808.4	39240.2	34253.3	44114.6	37204.4	29075.4	31026.9	34531.9	7	29134.2	42671.3	37992.8	57169.9	47627.2	49751.8	49562.6	44844.3	7	0.77004	0.159191	0
P47129	ACF4	288	_S[Phospho (STY)]EDEDDEEFEPMGDIPVHLFK_.3		8129.77	2501.45		4288.13	4910.21	12283.9	6422.69	5		2299.7	6341.14	5074.67	9401.71	1668.76	3912.12	4783.02	6	1.34281	0.758865	-1	1007.87	2339.39	6308.74	3667.07	4222.25	5218.16	5740.33	4071.97	7				70.1662	5860.36	1936.5		2622.34	3	1.5528	0.681123	4
Q07622	ACK1	143	_ES[Phospho (STY)]LGSPAVQDASISSGNR_.2									0	23079.5		14671.9	18851.5	15298.8			17975.4	4			-4	13196.2							13196.2	1	15489.9		19929.6	17180.4	15485.2		16343.1	16885.7	5	0.781501	0.421561	-4
Q07622	ACK1	146	_ESLGS[Phospho (STY)]PAVQDASISSGNR_.2	77577.3	63608.7	68193.4	64332.9	64664.3	52402.2	46031.2	62401.4	7	72438.8	43661.1	42843.6	43393.2	39941.1	42668.2	47748.8	47527.8	7	1.31294	0.165674	0	76737.4	56661.1	47416.9	58724.5	51080.4	49426.4	55766.2	56544.7	7	80078.8	70351.3	59975.4	69498.2	59697.5	63513.6	72630	67963.5	7	0.831986	0.163486	0
Q07622	ACK1	153	_ESLGSPAVQDAS[Phospho (STY)]ISSGNR_.2	6414.68							6414.68	1									0			1									0									0			0
Q08981	ACM1	31	_GNELRS[Phospho (STY)]PSK_.2							2301.95	2301.95	1	2827.22							2827.22	1	0.81421		0									0	2292.62						7214.6	4753.61	2			-2
Q08981	ACM1	37	_S[Phospho (STY)]QIDTDYALR_.2	39127.7	49277.3	43402.7	43702.4	40186.6	36688.3	38376.1	41537.3	7	67145.1	44770.5	51991.4	47136.4	41076.7	55315.7	71775.9	54173.1	7	0.766752	0.136768	0	16925.4	34905.4	37560.6	33310.3	35641.6	35144.1	31285.1	32110.4	7	45267.7	51782.5	35670.3	47458.8	47269.1	60720.2	62595.4	50109.1	7	0.640809	0.0173975	0
Q08981	ACM1	102	_ENLS[Phospho (STY)]PAK_.2	2258.69	437.338	5523.93	859.401	8620.79	6734.13	14026.8	5494.44	7	11021.8	15119.3	24188.9	30825	12380.4	6730.12	30110.9	18625.2	7	0.295	0.0735291	0	2121.08	636.324	1957.89	5618.17	3878.42	5798.19	5025.14	3576.46	7	2131.58	4191.61	5334.16	20914.8	22083.7	11045.1	6536	10319.6	7	0.346571	0.242052	0
Q08981	ACM1	126	_DLS[Phospho (STY)]VDEFK_.2	4589.86	7513.91	12022.5	7313.94	10783.6	7735.97	7331.72	8184.5	7	5011.9	6945.62	6629.05	7742.6	5481.17	7472.97	6650.06	6561.91	7	1.24727	0.454511	0	5993	7376.37	5711.09	6382.65	5885.91	5769.9	7399.11	6359.72	7	4399.86	5082.96	5649.53	5483.87	5194.73	4234.85	5721.6	5109.63	7	1.24465	0.0400704	0
Q08981	ACM1	161	_ISLPSFIT[Phospho (STY)]PPR_.2	395232	480579	413514	633178	398991	425392	379681	446652	7	724584	335961	320609	303540	270180	292171	663646	415813	7	1.07417	0.893924	0	301411	322416	293381	427074	433932	335354	301116	344955	7	510235	570556	353788	306846	506451	586100	654701	498382	7	0.692149	0.0913427	0
P19414	ACO1	298	_S[Phospho (STY)]MIEYLEATGR_.2	29776.6	12828.4	21175.3	7368.4	21108.6	19354.2	17534	18449.4	7	9181.8	31361.1	26852	26243.1	25623.4	28399	9440.06	22442.9	7	0.822057	0.720602	0	21229.5	31794.6	23598.8	22230.5	23458.9	29668.7	30886.7	26124	7	25847.9	28250.5	35221.7	26906.3	22880.9	19767.6	16905.8	25111.5	7	1.04032	0.892735	0
P19414	ACO1	409	_T[Phospho (STY)]IFTVTPGSEQIR_.2	9617.65	2015.23	5843.09		4749.25	5275.35	3965.01	5244.26	6			7596.65	9814.07	8690.64	8555.88	1747.22	7280.89	5	0.720277	0.62441	1	8213.28	9195.96	7245.12	6617.62	6195.57	7743.98	8431.84	7663.34	7		10543.5	10042.1	8554.49		4113.75	4688.88	7588.55	5	1.00986	0.981689	2
P19414	ACO1	417	_TIFTVTPGS[Phospho (STY)]EQIR_.2	4849.28		2406.34					3627.81	2		5905.48						5905.48	1	0.614312	0.782165	1	7014.13			2698.09			5550.61	5087.61	3			7748.69		4722.1			6235.4	2	0.815924	0.830007	1
P19414	ACO1	467	_NTIVS[Phospho (STY)]SYNR_.2									0									0			0					7511.89			7511.89	1									0			1
P19414	ACO1	468	_NTIVSS[Phospho (STY)]YNR_.2	8708.86		5260.39			4349.48	4085.06	5600.95	4		8718.86		7662.71		8794.32	1682.25	6714.54	4	0.834153	0.84485	0	13070	8759.66	6682.99			8786.19	9266.36	9313.04	5			10909	8147.56	5447.93	4893.29	5858.73	7051.31	5	1.32075	0.476463	0
P52910	ACS2	27	_APQHFYNS[Phospho (STY)]QPGK_.2	2992.92	3379.52				3753.95	4083.9	3552.57	4		4259.1	5708.91	6440.8	4818.24	3714.99		4988.41	5	0.712165	0.248758	-1	10149.7	4763.74	5608.55	2890.33	3091.13	5240.68	6189.79	5419.13	7	7669.46		5799.33				4010.23	5826.34	3	0.93011	0.925094	4
P52910	ACS2	27	_APQHFYNS[Phospho (STY)]QPGK_.3									0					2198.6		1019.22	1608.91	2			-2	6904.61	2148.97	2185.44				3686.73	3731.44	4	2231.94							2231.94	1	1.67184	0.822065	3
P52910	ACS2	93	_LNAS[Phospho (STY)]YNC[Carbamidomethyl (C)]VDR_.2	6877.8		3894.96		3458.52		2696.72	4232	4	1690.19	4083.97	4345.4	5055.5	4226.55	4578.32		3996.66	6	1.05889	0.936107	-2	3432.94	5515.6		3538.28	3616.31	5891.87	5325.11	4553.35	6	5199.26	6450.03	6896.41	5645.27	2230.72	3134.93	1720.14	4468.11	7	1.01908	0.975889	-1
P52910	ACS2	133	_VS[Phospho (STY)]QIAGVLK_.2	5757.08	1231.49	4599.44	512.767	3513.9	3599.46	3113.43	3189.65	7	1265.09	9178.27	6183.73	8187.56	5368.51	6464.19	873.059	5360.06	7	0.595078	0.473864	0	7100.67	6213.51	6796.67	6754.18	4105.45	6946.12	8309.36	6603.71	7	4609.73	9567.49	10418.4	8400.5	6585.46	3156.57	3739.4	6639.65	7	0.994586	0.990511	0
P52910	ACS2	228	_IVDEGLNGVDLVS[Phospho (STY)]R_.2	2797.94	1565.91	3754.34	408.988	2524.31	2858.7	1838.25	2249.78	7		4825.01	4391.55	4600.38	3881.03	3720.4	849.187	3711.26	6	0.606203	0.301285	1	4258.8	5824	5199.09	4641.19	4164.61	5019.91	5556.68	4952.04	7	1551.76	6840.28	7900.27	4925.99	4797.09	1847.57		4643.83	6	1.06637	0.908874	1
P52910	ACS2	236	_T[Phospho (STY)]GTEGIPMK_.2						7690.7		7690.7	1		10947.9		10041.9	7904.35		6897.92	8948.02	4	0.859486	0.841207	-3		11177.8	9977.85					10577.8	2							8303.71	8303.71	1	1.27387	0.59185	1
P52910	ACS2	238	_TGT[Phospho (STY)]EGIPMK_.2	16227.4		8848.53				8203.54	11093.1	3	7474.02		8208.78			10088.4		8590.41	3	1.29134	0.739537	0	15352.1			10267.9	8498.61	8931.11	10241.3	10658.2	5	13958.2	12532.4	13275.3	11861		6988.82		11723.1	5	0.909158	0.804171	0
P52910	ACS2	392	_YDTS[Phospho (STY)]SLR_.2									0				7213.66				7213.66	1			-1							7405.59	7405.59	1									0			1
P52910	ACS2	393	_YDTSS[Phospho (STY)]LR_.2	26642.4		17096.6	5728.49	14454.1	14196.1	10483.2	14766.8	6		22773.7	19342.2	19820.2	18845.5	20623.2		20281	5	0.728112	0.433137	1	24158.3	21918.2	19030.4		15536.3	20421.3	22603.9	20611.4	6		22243.6	26093.9	21661.3	15742.1	11467.5	8770.99	17663.2	6	1.16691	0.666619	0
P52910	ACS2	484	_S[Phospho (STY)]PWPSMAR_.2	138339	37075.8	65706	29021.8	58387.4	52374	56777.5	62525.9	7	59448	75928.9	67798.2	72056.8	58276.6	66263.6	28608.9	61197.3	7	1.02171	0.978526	0	92142.3	88241	77105.7	77338	68263.7	70913.6	72929.8	78133.4	7	104769	95668.7	92570.2	83035.5	66457.9	53576.1	66808.1	80412.2	7	0.971661	0.914203	0
P52910	ACS2	484	_S[Phospho (STY)]PWPSM[Oxidation (M)]AR_.2	14356.4	3127.75	7883.84		8115.31	5856.84	5764.21	7517.39	6		9151.65	6803.15	10287.2	8509.52	8191.37	3692.74	7772.61	6	0.967165	0.964825	0	10734.3	9575.59	8922.47	7174.93	6058.66	8276.3	7904.48	8378.11	7	10384.8	8391.12	9703.68	9412.73	9226.29	6473.88	5133.46	8389.43	7	0.998651	0.996187	0
P52910	ACS2	488	_SPWPS[Phospho (STY)]MAR_.2	47206.9		24111.8		19387.3			30235.3	3		49917.9	33045.2	38899.9	33847.4	31838.1		37509.7	5	0.806067	0.722214	-2	47683.7	40001.7	34844.1	33472.2		32271.8	38649.4	37820.5	6	41682.6	51824.9	48742.2	41824.2	30892.9	19664.7	27392.8	37432.1	7	1.01038	0.980347	-1
P52910	ACS2	539	_VDDVVNVS[Phospho (STY)]GHR_.2	4800.65	1748.89	2242.6	129.194	1903.16	2660.47	2598.87	2297.69	7	3750.16	2671.44	3280.64	5806.5	3204.43	1467.14	1599.09	3111.34	7	0.738489	0.664718	0	8987.34	3389.1	4455.04	1033.43	2539.57	4218.81	4999.99	4231.9	7	4813.87	2084.01	5461.52	3815.22	3155.62	1988.37	1519.29	3262.56	7	1.29711	0.7004	0
P52910	ACS2	620	_GEIGPFAS[Phospho (STY)]PK_.2	52421	35910.3	44944.5	43423.2	41715.3	39448.2	36651.2	42073.4	7	42943.2	42892	40689.1	42072.8	36945.7	45528.7	46470.6	42506	7	0.989823	0.955214	0	47026.6	39956.2	37999.5	40173.7	35756.5	37877.4	41335.3	40017.9	7	44870.4	55114.6	53004.8	49177.2	45440.8	45036.2	51028.4	49096.1	7	0.815094	0.0117215	0
P60010	ACT1	3	_M[Acetyl (Protein N-term)]DS[Phospho (STY)]EVAALVIDNGSGMC[Carbamidomethyl (C)]K_.2	149296	125176	107475	88664.1	103215	118216	147472	119931	7	150866	104724	119309	115055	111139	89536.3	86148.2	110968	7	1.08077	0.774107	0	67970	106834	126998	149971	96602.8	104071	97083.4	107076	7	167751	120872	102326	90078.7	91611.1	106160	46856.5	103665	7	1.0329	0.94138	0
P60010	ACT1	3	_M[Acetyl (Protein N-term)]DS[Phospho (STY)]EVAALVIDNGSGM[Oxidation (M)]C[Carbamidomethyl (C)]K_.2	21211.6	14833.1	16167.1	13609.9	16948.4	15448.8	15597.6	16259.5	7	18863.9	15641.7	13241.5	11628.8	14208.5	12047.7	16786.9	14631.3	7	1.11128	0.608578	0	7452.87	12441.2	14972.6	10110.5	13059.5	12260.7	17122.4	12488.5	7	22243.2	14856.3	16159	16076.4	11607.1	17554.9	6227.16	14960.6	7	0.834763	0.606155	0
P60010	ACT1	14	_M[Acetyl (Protein N-term)]DSEVAALVIDNGS[Phospho (STY)]GMC[Carbamidomethyl (C)]K_.2	7900.53	7488.92	4394.29		5120.16	6807.24	8953.29	6777.41	6	4286.7	5750.33	6289.96	5329.44	7821.18	5014.64	3056.55	5364.11	7	1.26347	0.472148	-1	1409.29	5003.91	4700.25	6700.52	5502.04	5370.61	5509.72	4885.19	7	7805.82	4194.46	3816.57	3432.66	3102.53	3772.41		4354.08	6	1.12198	0.818118	1
P60010	ACT1	33	_AVFPS[Phospho (STY)]IVGR_.2	335676	234130	438607	188843	338531	321862	303320	308710	7	142794	411925	380998	406427	442201	490272	200244	353552	7	0.873168	0.768008	0	335059	519984	365196	454347	375222	415243	536205	428751	7	292693	538900	715537	436138	409170	393753	365203	450199	7	0.952358	0.892911	0
P60010	ACT1	52	_DS[Phospho (STY)]YVGDEAQSK_.2			6579.63	9514.25	7814.08	8209.55	17482.7	9920.04	5	6494.03	22619.6	18781.4	25204.7	12588.8	14915.6	12207.2	16115.9	7	0.615543	0.378112	-2		12057.1			8252.27	11106.5	9348.33	10191	4			14379.4	18385.3	14627.5	6923.54		13578.9	4	0.750505	0.549589	0
P60010	ACT1	60	_DSYVGDEAQS[Phospho (STY)]K_.2	3057.98				6573.68		12515.4	7382.35	3	7967.93	8304.17	12913.2	9220.66	5728.28	12115.3	7232.5	9068.86	7	0.814034	0.783134	-4	7161.38	5071.11	1782.81		9011.53	5278.06	7913.96	6036.48	6	6962.87		9955.58	10591.4	14009.2		4387.78	9181.37	5	0.65747	0.400297	1
P60010	ACT1	198	_GY[Phospho (STY)]SFSTTAER_.2	19811.5	7920.13	12681.8	5177.72	11902.3	10918.9	10276.4	11241.2	7	7146.48	11212.3	10804.8	11149.1	10200.5	12644.8	6205.35	9909.06	7	1.13444	0.797815	0	10527.4	16340.9	13864.7	10197.9	10466.4	13436.2	13991.7	12689.3	7	14434.8	12158.6	15886.7	12480.2	9465.62	10774.7	11148.3	12335.5	7	1.02868	0.914203	0
P60010	ACT1	199	_GYS[Phospho (STY)]FSTTAER_.2	170372	102310	136581	94193.5	126543	115941	110255	122314	7	83228.5	155106	134758	142561	131858	156699	86471.9	127240	7	0.961281	0.912809	0	207623	199485	175023	182731	174715	196724	211634	192562	7	183793	225292	230206	222963	171008	158700	157883	192835	7	0.998584	0.994187	0
P60010	ACT1	201	_GYSFS[Phospho (STY)]TTAER_.2	55713.4	22644.6		18202.4	33686.9	31972.9	30999.5	32203.3	6	18732			45289.7			19232.2	27751.3	3	1.16042	0.87322	3	71859.5							71859.5	1	44237.2		82973.7		41012.2		26081.5	48576.2	4	1.47932	0.74275	-3
P60010	ACT1	203	_GYSFSTT[Phospho (STY)]AER_.2			2199.41		2937.14		1795.91	2310.82	3	1830.94						2204.62	2017.78	2	1.14523	0.827785	1						2091.2		2091.2	1	4005.44		2926.84			2477.09		3136.46	3	0.666738	0.679705	-2
P60010	ACT1	239	_S[Phospho (STY)]YELPDGQVITIGNER_.2	404477	133072	269580	85584.4	240553	219704	185079	219721	7	115345	452572	353945	384482	292714	336787	92264.3	289730	7	0.758366	0.656554	0	356156	389352	321349	324242	291902	358064	342367	340490	7	285765	371267	368984	337333	271766	207624	83978.8	275245	7	1.23704	0.407806	0
P60010	ACT1	239	_S[Phospho (STY)]YELPDGQVITIGNER_.3									0		23928.2	7588.71	5615.89				12377.6	3			-3				4679.86		5536.38		5108.12	2	7600.84		4970.91					6285.88	2	0.812634	0.762604	0
P60010	ACT1	323	_EITALAPS[Phospho (STY)]SMK_.2	52030.8	24184.5	37608.3	24206.2	32516.2	31881.8	29617	33149.3	7	38289.3	51576	43341.8		38617.4	41436.1	25517.8	39796.4	6	0.832972	0.572759	1	54184.5	43383.3	42225.9	43893.8	36224.9	39758.1	42415.7	43155.2	7	43766.1	58302.6	57156.3	52669.5	41590.3	35662.3	35694.1	46405.9	7	0.92995	0.74275	0
P60010	ACT1	323	_EITALAPS[Phospho (STY)]SM[Oxidation (M)]K_.2									0		2488.09						2488.09	1			-1									0									0			0
P60010	ACT1	324	_EITALAPSS[Phospho (STY)]MK_.2	207569	54868.1	110636	51866.6	90408.5	85100.1	76372.4	96688.7	7	87378.1	179216	140232	153260	124470	139854	48004.3	124630	7	0.775803	0.660653	0	224435	143387	133298	138522	100176	129825	142444	144584	7	161972	174405	178798	170696	113217	83321.2	80837.6	137607	7	1.0507	0.906057	0
P60010	ACT1	324	_EITALAPSS[Phospho (STY)]M[Oxidation (M)]K_.2									0		12495.8					6312.32	9404.04	2			-2	14971.2							14971.2	1	9590.72		13096.9	14191.9		7113.1		10998.1	4	1.36125	0.666878	-3
Q03233	ADD37	70	_TATT[Phospho (STY)]PPPVLR_.2	788621	608316	646638	694839	567727	544902	527558	625515	7	616832	588893	526515	574352	452017	571632	599816	561437	7	1.11413	0.472148	0	705786	517056	520151	529585	495031	501545	499240	538342	7	582047	616383	563960	581241	476189	503354	606734	561416	7	0.958901	0.781553	0
Q03233	ADD37	79	_RPS[Phospho (STY)]VTAAQQESAC[Carbamidomethyl (C)]EGVLVK_.3		58493.8			32080.6	47627.1	48660.9	46715.6	4			28080.8		33585.3		31772.8	31146.3	3	1.49988	0.306595	1							41666.2	41666.2	1					23526.9		26166.5	24846.7	2	1.67693	0.317112	-1
P36040	ADD66	248	_PIS[Phospho (STY)]WQGAYGMADAR_.2		5031.07		3643.81		3326.96	3859.95	3965.45	4							3568.85	3568.85	1	1.11113	0.876414	3		2518.11			3626.43			3072.27	2		5364.6				6314.69	8321.13	6666.81	3	0.460831	0.251439	-1
Q05911	ADE13	282	_S[Phospho (STY)]QIGSSAMAYK_.2	11665.4		4078.84					7872.13	2	3489.73	5733.42		5449.71	4629.36	5697.76	619.496	4269.91	6	1.84363	0.51483	-4	11349.4	5157.62	4370.94	4493.59	3983.16	5932.57	5567.56	5836.41	7	9835.95	5352.6	6407.04	5181.44				6694.26	4	0.871854	0.818764	3
P54113	ADE16	11	_TAILS[Phospho (STY)]VYDK_.2	5202.64				3832.19	4148.32	3663.43	4211.65	4		5432.8	5874.81	5818.3	4715.5	5161.17		5400.51	5	0.77986	0.137121	-1	3785.66	5802.98	5045.85	4914.34	3827.5	4951.34	6307.96	4947.95	7	3591.47	6925.22	7208.77	5929.81	3897.16	4498.85		5341.88	6	0.926255	0.819009	1
P54113	ADE16	54	_EAGFPVDDVSS[Phospho (STY)]ITHAPEMLGGR_.3			11414				11339.1	11376.5	2									0			2						7262.79		7262.79	1									0			1
P54113	ADE16	56	_EAGFPVDDVSSIT[Phospho (STY)]HAPEM[Oxidation (M)]LGGR_.2		3398.63					7672.49	5535.56	2									0			2									0							4266.63	4266.63	1			-1
P54113	ADE16	487	_S[Phospho (STY)]NAIDLFVTGQR_.2	2158.31	1492.22	2414.72		3059.1		3100	2444.87	5	392.563	5178	5208.32	4858.54	5799.96	3020.95		4076.39	6	0.599764	0.434693	-1	2328.68	3975.49	4573.35	2859	4111.22	5907.15	5886.91	4234.54	7	3204.76	5056	5870.17	4009.99	2941.42	2707.13	1141.32	3561.54	7	1.18896	0.711184	0
P21264	ADE2	37	_TVILDAENS[Phospho (STY)]PAK_.2	13373.9	16503.8	15263.6	16569.2	15341.1	13486	12671.8	14744.2	7	23090.6	22559.9	23487.1	24444.3	20108.5	22695.3	25826.4	23173.1	7	0.636262	5.5041e-05	0	14988.3	17403.6	15783.2	19331.2	17415.1	16575.3	15665.9	16737.5	7	32470.7	45782.1	40461.8	39612.8	36410.1	38158.1	44914.4	39687.1	7	0.421736	2.91261e-06	0
P07245	ADE3	17	_S[Phospho (STY)]NIANEIK_.2	10137.5	1468.73	5740.36	1967.61	3515.65		4377.33	4534.52	6	3154.96	10223.4	7373.46	8846.72	6589.94	7953.06	139.57	6325.87	7	0.716822	0.70468	-1	12508.1	5856.41	5374.21	5945.46	4901.63	7896.35	6997.6	7068.53	7	8618.12	7540.16	10713.7	7196.7	6150.99	4205.55	3514.1	6848.48	7	1.03213	0.954508	0
P07245	ADE3	171	_S[Phospho (STY)]DIVGSPVAELLK_.2	21523.1	8092.4	15150.9	4887.85	13701.1	12056.9	10323.6	12248	7	7671.65	27142.2	23598.4	27719.9	20471.3	20781.1	5794.79	19025.6	7	0.643762	0.406722	0	20573.2	23926.2	20786.4	19775.2	16811.5	21455.8	22303.8	20804.6	7	15204.8	23535.8	23975.5	20005.1	17125.4	11297.3		18524	6	1.12312	0.609826	1
P07245	ADE3	176	_SDIVGS[Phospho (STY)]PVAELLK_.2	19411.1	14159.7	17890.1	16120.9	17113.9	15595.6	14185.3	16353.8	7	17697.1	14117.3	14968.6	14269.8	12385.5	12886.4	15144	14495.5	7	1.1282	0.351422	0	17617.2	15155.3	14295.7	16118.3	16890.9	15780.6	16459	16045.3	7	17828.5	17324.9	14053	13903.4	16194.5	13805.3	15159.5	15467	7	1.03739	0.747004	0
P07245	ADE3	318	_LLT[Phospho (STY)]PVPSDIDISR_.2	199146	173753	197085	191755	156162	144197	147540	172805	7	206495	181296	175650	183343	145255	168682	180600	177332	7	0.974475	0.889367	0	183429	162732	153836	165238	158432	137563	160098	160190	7	169910	199258	174202	187345	172758	182788	175525	180255	7	0.888683	0.0712904	0
P07245	ADE3	318	_LLT[Phospho (STY)]PVPSDIDIS[Phospho (STY)]R_.2					38920.3			38920.3	1									0			1						29923.6		29923.6	1									0			1
P07245	ADE3	318	_LLT[Phospho (STY)]PVPS[Phospho (STY)]DIDISR_.2	27953.3	24319.6		30157.5		28117.8	27913.1	27692.3	5	26148.7	29181.1	32566.6	30565.5		28455.4	32156.1	29845.6	6	0.927852	0.489259	-1	26418.8	27386.5	27668.8	26986.1	23740.1	21949.6	21396.8	25078.1	7	21294.7	26497.6	23334.6	21220.1	27330.9	23048.1	29639.1	24623.6	7	1.01846	0.915607	0
P07245	ADE3	322	_LLTPVPS[Phospho (STY)]DIDISR_.2	103529	161292	114424	191291	109264	128428	106546	130682	7	130794	61624.7	58207.8	55726.3	45941.5	56784.2	176582	83665.8	7	1.56195	0.293135	0	61684.6	95749.5	81788.8	134771	122857	95704.7	67326.2	94268.7	7	86012.5	138105	86312.8	79313.4	121286	136750	168047	116547	7	0.808849	0.50676	0
P07245	ADE3	322	_LLT[Phospho (STY)]PVPS[Phospho (STY)]DIDISR_.2	27953.3	24319.6		30157.5		28117.8	27913.1	27692.3	5	26148.7	29181.1	32566.6	30565.5		28455.4	32156.1	29845.6	6	0.927852	0.489259	-1	26418.8	27386.5	27668.8	26986.1	23740.1	21949.6	21396.8	25078.1	7	21294.7	26497.6	23334.6	21220.1	27330.9	23048.1	29639.1	24623.6	7	1.01846	0.915607	0
P07245	ADE3	327	_LLT[Phospho (STY)]PVPSDIDIS[Phospho (STY)]R_.2					38920.3			38920.3	1									0			1						29923.6		29923.6	1									0			1
P04046	ADE4	488	_RES[Phospho (STY)]IANNSSDMK_.2	50805.9	16004	18899.9	17839	17106.6	20038.1	24309.6	23571.9	7	38731.1	18710.7	18433.9	21642.3	20473	15036.8	21686.4	22102	7	1.0665	0.930007	0	29039.2	15596.4	19008.3	16761.9	17151.1	17478.9	17789.7	18975.1	7	39099.8	14881.3	20159.1	16938.6	16886.2	17165.4	22231.9	21051.8	7	0.901353	0.813047	0
P04046	ADE4	488	_RES[Phospho (STY)]IANNSSDM[Oxidation (M)]K_.2	2228.67						340.368	1284.52	2	2859.45						1798.56	2329.01	2	0.551531	0.758446	0	952.438	341.585	768.996					687.673	3	2482.02		801.962					1641.99	2	0.418804	0.566664	1
P04046	ADE4	493	_ESIANNS[Phospho (STY)]SDMK_.2		11121.6	16840.2	24963.4	13511.1		21179.6	17523.2	5	26831.6	38230.9	26820.8	20572	15052.1	36732.2	21007.2	26463.8	7	0.662156	0.318316	-2	26314.9	16083.8	21545.6	18246.8	25977.6	20716.6	15492.9	20625.5	7									0			7
P04046	ADE4	494	_ESIANNSS[Phospho (STY)]DMK_.2									0	4194.94							4194.94	1			-1	6272.87							6272.87	1									0			1
P07244	ADE5,7	23	_LAQS[Phospho (STY)]PTVGK_.2	22783.9	19466.6	20150.7	20826.4	17236.3	16953	16912.6	19189.9	7	10730.6	13794.4	13185.3	13682	11340.1	15244	20242.9	14031.3	7	1.36765	0.0471401	0	13085.2	13671	16434	17567.1	17609.8	17191.2	15872.1	15918.6	7	15286.8	18749.5	17044.2	14416	15757.7	14991.3	19019.3	16466.4	7	0.966734	0.821436	0
P07244	ADE5,7	247	_GLNTGGMGAYAPAPVAT[Phospho (STY)]PSLLK_.2	29308.4		19051.9	17939.9	14958.5	13872.5	12249.5	17896.8	6	27220.2	15659.4	13372	16400.7	8925.79	12877.6	15273.8	15675.6	7	1.14169	0.80195	-1	24914.6	17354.7	15136.9	16596.4	16938	13857.1	15815.3	17230.4	7	22756.1	23060.2	18523.3	15126.4	18085.6	18079	18690.4	19188.7	7	0.897947	0.595586	0
P07244	ADE5,7	247	_GLNTGGMGAYAPAPVAT[Phospho (STY)]PSLLK_.3	5323.01	1191.71						3257.36	2	5407.7	2327.1						3867.4	2	0.84226	0.946868	0	4957.65							4957.65	1	5682.8							5682.8	1	0.872396		0
P07244	ADE5,7	402	_VLS[Phospho (STY)]VTSTAQDLR_.2	5081.82	3436.5	6152.99	5350.95	6784.31	4692.71	5329.17	5261.21	7				1765.66	1266.01			1515.83	2	3.47083	0.0298505	5	4441.55	5007.38	5259.85	5179.32	5093.54	5412.86	5342.32	5105.26	7			1991.33	2180.81	1403.36			1858.5	3	2.74698	3.91819e-05	4
P38972	ADE6	195	_PLVHVPLT[Phospho (STY)]PK_.2	2251.66	5254.49	4912.82	4845.22	4107.99	2678.66	5470.82	4217.38	7	5222.77	6041.95	4673.46	4079.84	5572.34	4232.8	6315.47	5162.66	7	0.8169	0.451588	0	9144.31	5932.51	6767.21	2486.53	4483.93	5153.65	8185.56	6021.96	7	3226.86	2887.26	7666.64	6827.33	7955.73	8618.98	6087.15	6181.42	7	0.974203	0.961703	0
P38972	ADE6	333	_VET[Phospho (STY)]HNHPTAVSPFPGAATGSGGEIR_.3									0				7518.04			5905.91	6711.98	2			-2	6452.02							6452.02	1	5589.14							5589.14	1	1.15439		0
P38972	ADE6	338	_VETHNHPT[Phospho (STY)]AVSPFPGAATGSGGEIR_.3		12551.9				9285.57		10918.7	2							5347.02	5347.02	1	2.04202	0.656177	1		1302.66	4993.86				10311.7	5536.07	3					14480.7			14480.7	1	0.382306	0.546296	2
P38972	ADE6	898	_S[Phospho (STY)]PTVYDNAILK_.2	8763.85						3941.09	6352.47	2	4036.19					7135.24		5585.71	2	1.13727	0.938269	0		7730.8	6584.67	3884.62		9520.9	6201.77	6784.55	5	6964.84		13430.8	11239.5				10545.1	3	0.643387	0.323917	2
P00330	ADH1	15	_GVIFYES[Phospho (STY)]HGK_.2	3016.9	27746.9				21726.4	23307.1	18949.3	4	28125.5	9462.8	24978.2	16253.2	23638.1	20556	16241.8	19893.7	7	0.952532	0.954327	-3	38227.6	8038.27	17607.4		3847.19	12230.6	40013.9	19994.2	6	48843.4		9137.25	4686.52	49936.7	5505.08	25397.6	23917.8	6	0.835955	0.889882	0
P00330	ADH1	88	_IGDY[Phospho (STY)]AGIK_.2	74235.4	27695.9	47272.4	18820.7	41919.5	23597.2	37386.2	38703.9	7	23705	54546.7	50904.5	59859.6	46033.8	56447.5	20720.2	44602.5	7	0.867752	0.815123	0	49742.3	64208.5	60103.8	55110.9	48325	60384.5	58369.3	56606.3	7	50979.4	67326.6	73662.8	11276	48531.7	39732.2	34026.2	46505	7	1.21721	0.560517	0
P00330	ADH1	213	_S[Phospho (STY)]IGGEVFIDFTK_.2		6870.74			2323.41	8819.94	10870.2	7221.06	4		1617.26	14407.4	1777.34	20794			9648.99	4	0.748375	0.869461	0		963.925	1186.03	1154.61		5032.39	5566.12	2780.62	5			396.394		508.315			452.355	2	6.14698	0.553193	3
P00330	ADH1	265	_ANGT[Phospho (STY)]T[Phospho (STY)]VLVGMPAGAK_.2	179579	111040	249802	103925	218340	171235	97298.6	161603	7	319629	161692	173320	114580	139124	198294	163676	181474	7	0.890503	0.829456	0		143837	236800	212160	204966	198211	189487	197577	6	77726.7	181222	16311.4	176110	192382	213417	28498.3	126524	7	1.56158	0.292277	-1
P00330	ADH1	265	_ANGT[Phospho (STY)]T[Phospho (STY)]VLVGM[Oxidation (M)]PAGAK_.2		12589.3	32437.9	12455.1	15664.8	20700.8	15870	18286.3	6			15500.3	19832.2	14685.5	22921.1	7982.08	16184.2	5	1.12988	0.855182	1	6295.03	18738.3	24881.6	19135.1	20945.3	20816.7	22348.8	19023	7	3233.06	14195.2	16944.8		21254.8			13907	4	1.36787	0.564998	3
P00330	ADH1	266	_ANGT[Phospho (STY)]T[Phospho (STY)]VLVGMPAGAK_.2	179579	111040	249802	103925	218340	171235	97298.6	161603	7	319629	161692	173320	114580	139124	198294	163676	181474	7	0.890503	0.829456	0		143837	236800	212160	204966	198211	189487	197577	6	77726.7	181222	16311.4	176110	192382	213417	28498.3	126524	7	1.56158	0.292277	-1
P00330	ADH1	266	_ANGT[Phospho (STY)]T[Phospho (STY)]VLVGM[Oxidation (M)]PAGAK_.2		12589.3	32437.9	12455.1	15664.8	20700.8	15870	18286.3	6			15500.3	19832.2	14685.5	22921.1	7982.08	16184.2	5	1.12988	0.855182	1	6295.03	18738.3	24881.6	19135.1	20945.3	20816.7	22348.8	19023	7	3233.06	14195.2	16944.8		21254.8			13907	4	1.36787	0.564998	3
P00330	ADH1	279	_C[Carbamidomethyl (C)]C[Carbamidomethyl (C)]S[Phospho (STY)]DVFNQVVK_.2	7941.6	1375.66	1197.96		5144.99	5383.94	3536.54	4096.78	6	1744.26	8047.73	5650.19	6655.5	5732.79	6513.86	1723.06	5152.48	7	0.795108	0.778757	-1	1751.96	7744.95	9464.49	8507.49	6007.84	1344.95	7425.07	6035.25	7	6160.22	11080.9	12877.1	8250.82	7502		3701.75	8262.12	6	0.730472	0.565074	1
P00330	ADH1	288	_S[Phospho (STY)]ISIVGSYVGNR_.2	454969	352770	565606	197006	493685	465483	506847	433766	7		784129	671110	676095	663311	587799		676489	5	0.641203	0.0346228	2	572583	655242	679506	603691	439877	577427	713906	606033	7	432630	620878	687220	677619	534903	481197	617791	578891	7	1.04689	0.82744	0
P00330	ADH1	290	_SIS[Phospho (STY)]IVGSYVGNR_.2	308757	248262	439670	168455	374417	327504	344617	315954	7	420194	633660	461900	527946	479728	474382	448512	492331	7	0.641751	0.0203386	0		476467	471634	352595	365738	466506	569896	450473	6	311798	531912	619672	550907	425956	334775	394586	452801	7	0.994858	0.98784	-1
P00330	ADH1	294	_SISIVGS[Phospho (STY)]YVGNR_.2	300475	248587	412019	144830	365659	323022	368368	308994	7	128040	667409	525856	540313	548510	463930	169340	434771	7	0.710706	0.502558	0	438203	548478	542552	412409	365643	487632	640816	490819	7	373688	556577	657855	578801	460424	365745	374655	481106	7	1.02019	0.952169	0
P00330	ADH1	295	_SISIVGSY[Phospho (STY)]VGNR_.2	28730.3		33145.5		28324	27321	32452.2	29994.6	5	12326.9	37133.4	32226.7	31369.6	39122.3	31130.1		30551.5	6	0.981772	0.970225	-1	20412.9	34122.9	36751.2		26402.2	33325.8	42027.1	32173.7	6	31875.6	31439.1	38864.3	36648.8	34557.9	27605.1	34060.5	33578.8	7	0.958156	0.866491	-1
P00330	ADH1	316	_GLVKS[Phospho (STY)]PIK_.2	52460.4	35999.2	30491.2	34446.3	29858.7	27454.8	31284.4	34570.7	7	101044	27591.1	30927.5	21999.1	24685.6	27467.1	41421.8	39305.1	7	0.879547	0.881518	0	89503	28314.3	19776.1	19621	26577.9	24605.1	25512.3	33415.7	7	324088	19888	29146.3	34373.8	28542.3	31999.6	660228	161181	7	0.207318	0.506545	0
P00330	ADH1	316	_GLVKS[Phospho (STY)]PIK_.1	1247.97							1247.97	1	4338.16						168.808	2253.49	2	0.553797	0.944193	-1	2810.08							2810.08	1	15057.3						8740.81	11899.1	2	0.23616	0.659446	-1
P00330	ADH1	324	_VVGLS[Phospho (STY)]TLPEIYEK_.2	178574	109083	157347	81530.4	149673	149699	126383	136041	7	79827.9	174726	141212	155822	123793	119712	73976.6	124153	7	1.09576	0.815603	0	193215	178420	156393	219729	179074		188799	185938	6	181756	262520	185640	149027	210059	146653	94571.7	175747	7	1.05799	0.863479	-1
P00330	ADH1	324	_VVGLS[Phospho (STY)]T[Phospho (STY)]LPEIYEK_.2				20136.5			194251	107194	2					100711		207350	154031	2	0.695923	0.888263	0	3519.72	87844.7	46484.6			119892	28253.8	57199	5	100017	111115			83348	238800		133320	4	0.429036	0.332244	1
P00330	ADH1	325	_VVGLST[Phospho (STY)]LPEIYEK_.2	10687.4	7861.71	5831.15	8299.49			6170.39	7770.02	5	9969.93				2464.85		6677.25	6370.67	3	1.21965	0.797354	2	6558.41	4501.47			6599.23	4628.41	5382.28	5533.96	5	8008.19					7794.8	7965.15	7922.71	3	0.698493	0.0609383	2
P00330	ADH1	325	_VVGLS[Phospho (STY)]T[Phospho (STY)]LPEIYEK_.2				20136.5			194251	107194	2					100711		207350	154031	2	0.695923	0.888263	0	3519.72	87844.7	46484.6			119892	28253.8	57199	5	100017	111115			83348	238800		133320	4	0.429036	0.332244	1
P00330	ADH1	330	_VVGLSTLPEIY[Phospho (STY)]EK_.2	21354.5	12636.5	14000.1	7315.67	13171	17109.6	14150.4	14248.2	7	11520.5	12680	10117.7	11418.3	9733.01	9165.01	8040.92	10382.2	7	1.37237	0.246084	0	12498.9	16438.5	14737.7	22877.3	19296.7	18213.7	13454.6	16788.2	7	22484.6	24906	16611.7	13311.3	18155.9	15381.8	12924.7	17682.3	7	0.949435	0.875149	0
P00330	ADH1	346	_YVVDT[Phospho (STY)]SK_.2				16279.5	22377.9	22583.9	17729.1	19742.6	4		24020	22472.9	22273.3		29769.6	16188.4	22944.8	5	0.860438	0.653532	-1	30143	26210.3	23636.6		23834.4	28606.4		26486.1	5	20096.2	32462.2		28668.2			19986.8	25303.4	4	1.04674	0.887074	1
P00330	ADH1	347	_YVVDTS[Phospho (STY)]K_.2									0					20968.4			20968.4	1			-1				28189.4			28206.9	28198.1	2						22990.3		22990.3	1	1.22652	0.0207367	1
P00330	ADH1	347	_YVVDTS[Phospho (STY)]K_.1	3259.14							3259.14	1	1546.09							1546.09	1	2.10799		0	4715.48	821.374	894.215					2143.69	3	2832.37	534.31	1756.2					1707.63	3	1.25536	0.915105	0
P07246	ADH3	337	_EALDFFS[Phospho (STY)]R_.2	2485.77	1.08411	1908.63		1589.16		1515.65	1500.06	5		3512.94	2995.85	3079.65	2305.1	2821.03		2942.92	5	0.509719	0.110206	0	2051.27	3341.96	3174.83	2039.69	2262.84	3334.25	4408.83	2944.81	7	1180.59	3535.12	4259	2781.59	2340.26	1519.83		2602.73	6	1.13143	0.805535	1
Q04894	ADH6	193	_VGIVGLGGIGS[Phospho (STY)]MGTLISK_.2			6588.77		7529.56	8866.95	8612.36	7899.41	4			14952	10875.8	12726.4			12851.4	3	0.614674	0.0771561	1	7149	11473.7	9789.51	10729.9	11335.8	13198.3	14364.1	11148.6	7	5465.79	11791.1	9400.58	8253.96	9968.71	5048.2	8238.8	8309.59	7	1.34166	0.212642	0
Q04894	ADH6	199	_VGIVGLGGIGSMGTLIS[Phospho (STY)]K_.2									0									0			0					2493.3	2523.76		2508.53	2									0			2
Q04894	ADH6	210	_AMGAETYVIS[Phospho (STY)]R_.2	9065.03		4898.37					6981.7	2					5302.56	5333.83		5318.2	2	1.31279	0.800468	0	10328.4	7217.75	6707.89		5127.47	6510.81	7864.8	7292.86	6	11034.1	8537.31	7451.55	8026.59	4754.14			7960.74	5	0.916103	0.823227	1
Q04894	ADH6	359	_FTLVGYDKEFS[Phospho (STY)]D_.2	14100.8			4361.8			2234.02	6898.86	3	19037.4						5111.87	12074.7	2	0.571351	0.803105	1	6428.91				1282.29			3855.6	2	3586.14				2003.95		46518.2	17369.4	3	0.221977	0.787072	-1
P07170	ADK1	140	_LIHPAS[Phospho (STY)]GR_.2	41034.9	17501.8	21892.7	19705.9	20058.9	22400.7	21644.6	23462.8	7		18315.1	14953.3	15555.5	15225	12580	12739.9	14894.8	6	1.57523	0.176397	1	21193.6	22372.3	22524.9	34197.1	31712.4	28877	18777.4	25665	7	23457.2	30444.1	34130.5	19802.2	18535.3	27943.6	15218.3	24218.7	7	1.05971	0.869628	0
P47143	ADO1	108	_S[Phospho (STY)]MYQVQNDIGTGK_.2	189449	40015.9	90356.2	24394.5	72391.4	63152.1	56344.2	76586.2	7	44647.1	114748	100679	107400	92514.3	104326	23335.3	83949.9	7	0.912284	0.920458	0	137991	149934	131534	120527	95378.1	124164	122852	126055	7	127903	144043	174690	132857	89964.8	65215.3	51273.7	112278	7	1.1227	0.747339	0
P47143	ADO1	108	_S[Phospho (STY)]M[Oxidation (M)]YQVQNDIGTGK_.2	26583.9		20787		21340.1	15872.4	13133.2	19543.3	5	6572.29	26687.8	25250.1	28970.3	24822.2	31272.6	7325.18	21557.2	7	0.906578	0.889456	-2	25851	30666.9	25137.2	26766.6	23114.1	28892.2	34491.9	27845.7	7	26082.2	30405.1	40079.2	39563.6	27071.5	20508	12402.5	28016	7	0.993921	0.987393	0
P47143	ADO1	110	_SMY[Phospho (STY)]QVQNDIGTGK_.2	1730.9		925.844					1328.37	2		1119.67			342.842			731.254	2	1.81656	0.734477	0		1353.34			915.603		1281.84	1183.59	3		1327.3		1117.88		556.259		1000.48	3	1.18303	0.789458	0
P47143	ADO1	131	_S[Phospho (STY)]LVTDLGAANFFTPDHLDK_.3	8397.55	8549.14	9019.83		11863.7	9904.62	10695	9738.31	6		18592.9	23992.7	17119.2	17887.2	10418.9	2564.24	15095.9	6	0.645098	0.42178	0	12467.9	21450	14957	18612.6	17404.3	20054.1	27330.8	18896.7	7	17297.8	14467.2	13148.1	16705.1	13971.7	6833.24	7575.08	12856.9	7	1.46977	0.150332	0
P47143	ADO1	131	_S[Phospho (STY)]LVTDLGAANFFTPDHLDK_.2									0						7142.75		7142.75	1			-1							14463.4	14463.4	1		8209.47			7200.69			7705.08	2	1.87712	0.308488	-1
P47143	ADO1	249	_IVKDS[Phospho (STY)]PVEK_.2	2395.53				6967.52	4850.35	6826.74	5260.04	4	2875.07	6077.37	2927.7		2610.74	6550.67	4059.22	4183.46	6	1.25734	0.739318	-2	984.704	7258.71		10384.1		8352.6	6060.55	6608.13	5	4124.18	13886.6	9528.45	10774.6	4515.27	9851.49	4437.29	8159.69	7	0.80985	0.766545	-2
P47143	ADO1	273	_GTS[Phospho (STY)]TYPVKPLDSSK_.2	14937.2	5434.12	7191.34		4546.71	5655.16	5240.45	7167.5	6		11960.7	12509.9	14801.3	11790.4	13271.2		12866.7	5	0.557058	0.104896	1	29123.2	17371.5	16744.7	12267.6	11166.9	16180.3	23023.4	17982.5	7		11405.4	18906	19669.8	12687	6556.12	8172.04	12899.4	6	1.39406	0.432835	1
P47143	ADO1	282	_GTSTYPVKPLDS[Phospho (STY)]SK_.2	65089.1	67769.2	46823.9	52628.9	48732.1	53317.9	53778.1	55448.5	7	100721	34317.7	45065.3	45570.9	38770.2	52323.3	47619.3	52055.4	7	1.06518	0.896202	0	101051	50758.5	61993.5	46234.3	54192.5	58336	66317.1	62697.6	7	95532.8	34039.7	57151.8	51623.7	49888.2	42050.8	61047.4	55904.9	7	1.1215	0.780419	0
P47143	ADO1	282	_GTSTYPVKPLDS[Phospho (STY)]SK_.3	7848.26	10559.2	10155.4	10716.8	9013.4	8016.72	7836.84	9163.82	7	10638.2	4622.77		6740.08	6862.66		7729.65	7318.68	5	1.25211	0.377587	2	12293.3	8681.26			10395.8			10456.8	3	9819.98	7284.68	9936.83			7150.3	11140.8	9066.51	5	1.15334	0.642974	-2
P25371	ADP1	659	_NIS[Phospho (STY)]DLEAGTDTNDIDNTIHQTTFTSSDGTTQR_.3					19166.3			19166.3	1									0			1					13458.2			13458.2	1				10984.9				10984.9	1	1.22515		0
P25371	ADP1	702	_S[Phospho (STY)]LLRDEEDVEGTDGR_.2	173046	192245	193605	207558	185895	163941	164210	182929	7	175950	160080	127455	99941.5	107208	138929	182161	141675	7	1.29119	0.0960251	0	145591	150770	133133	128692	153065	133991	132618	139694	7	217132	131010	138748	131247	98122.5	167062	182953	152325	7	0.91708	0.724724	0
P25371	ADP1	702	_S[Phospho (STY)]LLRDEEDVEGTDGR_.3	109354	136380	137200	205064	180890	135503	122359	146679	7	92973.4	114323	138816	86023.8	87685.8	99572.6	113340	104676	7	1.40126	0.114802	0	90909.3	107200	95995.6	110845	121359	96710.7	78116.7	100162	7	118029	122377	115871	121218	74232.3	116032	100659	109774	7	0.912442	0.59501	0
P25371	ADP1	702	_DEIRS[Phospho (STY)]LLR_.2									0									0			0									0	1711.27						7333.02	4522.14	2			-2
P07248	ADR1	259	_FST[Phospho (STY)]PELVPLDLK_.2	924702	779633	874867	916018	768585	760390	680907	815014	7	945203	847283	778386	809862	638053	685444	745912	778592	7	1.04678	0.794114	0	616779	599430	553569	610739	607480	563988	587006	591284	7	628995	673259	550500	537253	577545	563828	627876	594179	7	0.995128	0.96067	0
P07248	ADR1	301	_SDS[Phospho (STY)]SGS[Phospho (STY)]TMNLDYK_.2	9435.1							9435.1	1									0			1			3706.11					3706.11	1	6375.57	4539.83						5457.7	2	0.679061	0.753582	-1
P07248	ADR1	301	_SDS[Phospho (STY)]SGSTMNLDYK_.2	7558.02	4962.03	4723.12	4340.84	3716.21	4929.52	3986.27	4888	7	4909.06	3511.45	2913.51	2954.99	3181.55	3624.24	2902.96	3428.25	7	1.4258	0.150981	0	5893.48	4299.66	3257.28	3939.21	4220.76	3834.69	3473.6	4131.24	7	4769.27	3700.24	2416.53	3657.84	3108.77	2481.67	3954.63	3441.28	7	1.2005	0.443473	0
P07248	ADR1	304	_SDS[Phospho (STY)]SGS[Phospho (STY)]TMNLDYK_.2	9435.1							9435.1	1									0			1			3706.11					3706.11	1	6375.57	4539.83						5457.7	2	0.679061	0.753582	-1
P07248	ADR1	305	_SDSSGST[Phospho (STY)]MNLDYK_.2									0									0			0	246.508							246.508	1									0			1
P07248	ADR1	325	_LPESANNYTYSSGS[Phospho (STY)]PTR_.2	27716	12088.1	16949.8	13983.4	15549.8	11475.1	12630.1	15770.3	7	45233.8	23941.5	23948.8	25704.4	22045.1	23656.9	29265.1	27685.1	7	0.569633	0.0735291	0	20267.1	12186.3		12792.2	10654.1	10237.1	11563.3	12950	6	33466.5	21385.9	19924.3	19596.5	18880.9	20429.1	21240.4	22131.9	7	0.585128	0.0359579	-1
Q99222	AFI1	9	_ELNNS[Phospho (STY)]ISNR_.2	219861	13546.6	7235.03	15578.9	9617.68	13588.6	27767.9	43885.1	7	156231	87605.8	82299.4	85510.8	43736.9	73349.4	107418	90878.8	7	0.482897	0.51368	0	198933	5363.35	10400.3				5200.34	54974.2	4	170019	7879.23	7663.45	123298		101556	102864	85546.7	6	0.642622	0.806503	-2
Q99222	AFI1	9	_ELNNS[Phospho (STY)]ISNR_.1	1307.83							1307.83	1	746.025							746.025	1	1.75306		0	526.989							526.989	1	567.84							567.84	1	0.928059		0
Q99222	AFI1	9	_ELNNS[Phospho (STY)]IS[Phospho (STY)]NR_.2		1.46174		749.932			166.718	306.037	3		804.935	423.057			1640.34	901.237	942.392	4	0.324745	0.456281	-1	163.518	1062.85	315.881	212.331	589.494			468.814	5	322.879		220.666		1266.17			603.238	3	0.777163	0.877942	2
Q99222	AFI1	11	_ELNNSIS[Phospho (STY)]NR_.2		10661.2		10603		10387.7	7553.74	9801.4	4	23342.7			7519.68	6585.15	6809.9	8859.85	10623.4	5	0.92262	0.945442	-1	13477	8846.01	8527.96		8367.19	8252.38	8679.78	9358.39	6	10844	9466.32		8275.78	8293.5	7457.8	6417.61	8459.16	6	1.1063	0.709403	0
Q99222	AFI1	11	_ELNNS[Phospho (STY)]IS[Phospho (STY)]NR_.2		1.46174		749.932			166.718	306.037	3		804.935	423.057			1640.34	901.237	942.392	4	0.324745	0.456281	-1	163.518	1062.85	315.881	212.331	589.494			468.814	5	322.879		220.666		1266.17			603.238	3	0.777163	0.877942	2
Q99222	AFI1	14	_S[Phospho (STY)]IENESFPFER_.2	135481	355858	372146	445179	342355	336024	323383	330061	7	223183	213624	231395	228144	180662	256444	390303	246251	7	1.34034	0.345962	0	106470	280086	292690	281598	314416	275461	243009	256247	7	123888	336158	277098	290610	298257	382188	417930	303733	7	0.843659	0.62251	0
Q99222	AFI1	19	_SIENES[Phospho (STY)]FPFER_.3	94981.4	85345.2	95659.5	107803	84650.7	92208.6	66515.5	89594.9	7	72569.8	131025		80530	67134.9	82480.8	79487.5	85538	6	1.04743	0.888892	1	98188.2			97221.1	74637.1	84103.8	91711	89172.2	5	66469.2	96285.6	79543.3	93424.8	77804.8	78077.1	96478	84011.8	7	1.06142	0.731288	-2
Q99222	AFI1	743	_IAQSSS[Phospho (STY)]LR_.2	5982.37				3801.7		6006.16	5263.41	3	1930.38			2193.79	1890.51	2936.49	4314.45	2653.13	5	1.98385	0.134679	-2			5330.88		4871.61	4635.31	2747.59	4396.35	4	4493.68		8006.11		6421.78	9657.81	6112.87	6938.45	5	0.633621	0.24845	-1
P33304	AFR1	24	_SNS[Phospho (STY)]TSNLFALSSTFSK_.2	22091.2	17863.4	11959.7	10617.9	15868.2	14859.5	14610.7	15410.1	7	14179.2		9483.02	7727.02			9366.72	10189	4	1.51242	0.232107	3	18339.5	11346.8	11050.6	13688.3	12214.7	10516.7	13551.5	12958.3	7	24963.3				10084	11282.3	11745.5	14518.8	4	0.892519	0.827837	3
P33304	AFR1	79	_SC[Carbamidomethyl (C)]S[Phospho (STY)]MTAAQQR_.2	36750	11502	15440.4	14173.5	12874.5	14436.9	14497.7	17096.4	7	6174.42	6745.2	3756.76	5226.79	5102.01	5314.92	4423.27	5249.05	7	3.25705	0.0456904	0	11282.6	15401.3	16194.2	15499.8	16596.6	15787.8	13074.6	14833.9	7	17743.1	11490.5	13613.5	10791.7	6105.68	11155.1	9470.7	11481.5	7	1.29198	0.230324	0
P33304	AFR1	472	_RPS[Phospho (STY)]LDDNESAR_.2	14347.9	14470.9	11978.2	20961.9	13334.3	12181.8	13719.4	14427.8	7	9338.41	12730.2	5366.12	4042.43	5848.11	7397.4	9301.27	7717.71	7	1.86943	0.0196448	0	14049.8	17320	19651.8	16713.9	14524.7	12214.9	7169.49	14520.7	7	4237.51	3699.3	9628.62	10053.2	3458.34	10814.5	3497.21	6484.1	7	2.23943	0.0203181	0
P33304	AFR1	526	_RNS[Phospho (STY)]LPDSSFDK_.2	3515.85	10577.4	2673.06	4257.33	4574.78	8149.37	8139.87	5983.96	7	9217.6	1681.64	3365.41	4109.3	4804.75	3511.28	6180.5	4695.78	7	1.27433	0.729428	0	8460.8	4083.03	6782.41	1032.06	3498.14	5293.93	7605.25	5250.8	7	9431.64				6966.03	3487.43	7523.16	6852.07	4	0.76631	0.658949	3
P33304	AFR1	537	_VET[Phospho (STY)]PPKPIK_.2	28175.5	36081.5	35884.1	40594.6	32992.9	31206.8	33214.6	34021.4	7	26267.9	30216.1	26914.1	28587.1	23124.6	23005.4	31540.4	27093.7	7	1.2557	0.0457965	0	36785	30113.5	33621.1	31093.6	33993.1	32293.1	33025.7	32989.3	7	25378.9	31487.4	47348.9	40409.1	29455.9	36540.3	44613.7	36462	7	0.904757	0.614046	0
P22149	AFT1	32	_S[Phospho (STY)]ASEYVVNHNEGR_.2									0	4221.62							4221.62	1			-1									0									0			0
P22149	AFT1	34	_SAS[Phospho (STY)]EYVVNHNEGR_.2		2774.35						2774.35	1			2090.85					2090.85	1	1.3269		0			2087.02				2459.1	2273.06	2	4445.47			2116.2				3280.83	2	0.692831	0.762173	0
P22149	AFT1	369	_TT[Phospho (STY)]MQNFLTTK_.2									0									0			0	4729.26							4729.26	1			9052.32					9052.32	1	0.522437		0
P22149	AFT1	612	_HLS[Phospho (STY)]SNEPQVR_.2		35429	19643.9	26665.2	22664.6	27598.7	32233.3	27372.5	6									0			6	36867.3	20045.8	31070.7	17757.8	18962.9	25700.4	31215.3	25945.7	7			3389.98		4709.56		7447.92	5182.49	3	5.00643	0.0185504	4
Q04412	AGE1	450	_WS[Phospho (STY)]LSSIPK_.2	6549.92	8054.14	8917.76	8731.27	7222.11	9485.17	8344.7	8186.44	7	7825.02	21073.9	18066.3	19419.5	16526.3	21089.7	14850.3	16978.7	7	0.482159	0.00749738	0	7718.49	8173.86	10731.3	8549.46	8369.21	8967.1	8631.86	8734.47	7	2636.64	20759.8	24271.2	18659.2	17536	7626.22	12946.9	14919.4	7	0.585443	0.244259	0
Q04412	AGE1	453	_WSLSS[Phospho (STY)]IPK_.2									0	7496.62	8018.88		6128.68			8668.53	7578.18	4			-4		6687.11	5186.33		6194.4			6022.61	3	7171.1				7960.98	8591.18	9931.79	8413.76	4	0.715805	0.156333	-1
Q04412	AGE1	463	_SSQNLMS[Phospho (STY)]PTNLLTMHK_.2	19682	14478.3	6535.56	6976.96	9296.86	11662.2	14815.8	11921.1	7	35807.5	9545.42	9487.04	11598.8	8719.17	6600.99	11246.2	13286.4	7	0.897237	0.913904	0	44682.8	14180.9	16383.6	7098.96	10473.8	13623.5	20177.2	18088.7	7	54962.9	8144.76	14529.4	11929.2	22782.8	16001.4	26178.1	22075.5	7	0.819402	0.832091	0
Q04412	AGE1	463	_SSQNLMS[Phospho (STY)]PTNLLTMHK_.3	12467.6	7685.52	6273.82		6047.81	8555.01	9324.09	8392.31	6	19317.6	6092.3	7263.01	5904.38	5845.83	3672.26	7535.53	7947.28	7	1.056	0.951112	-1	28509.4	8703.07	12825.6		5040.21	6907.54	13752	12623	6	35595.7	3543.04	8204.76	5788.23	13467.6	9109.68	12379	12584	7	1.0031	0.998014	-1
Q04412	AGE1	463	_SSQNLMS[Phospho (STY)]PTNLLTM[Oxidation (M)]HK_.3									0	3117.36							3117.36	1			-1									0	3795.59						3731.07	3763.33	2			-2
Q04412	AGE1	463	_SSQNLM[Oxidation (M)]S[Phospho (STY)]PTNLLTMHK_.3									0									0			0	2990.13							2990.13	1	2566.14							2566.14	1	1.16522		0
Q04412	AGE1	463	_SSQNLM[Oxidation (M)]S[Phospho (STY)]PTNLLTMHK_.2									0									0			0	2161.06							2161.06	1	2009.41							2009.41	1	1.07547		0
P40529	AGE2	159	_LDQS[Phospho (STY)]SNSLQK_.2	756.949	1564.02			842.375			1054.45	3			753.244		514.122	1000.44		755.935	3	1.39489	0.709654	0			851.787					851.787	1			441.173					441.173	1	1.93073		0
P40529	AGE2	162	_LDQSSNS[Phospho (STY)]LQK_.2			5658.05		4647.01	5887.9	5051.72	5311.17	4	2529.81	5136.88		4448.37	3804.54	3956.75	5222.91	4183.21	6	1.26964	0.338184	-2	1239.09	4726.6	4480.46	4879.13	5165.6	4780.73	4477.52	4249.88	7	3248.6	4637.55	5773.59	5376.12	4678.48	4582.75		4716.18	6	0.901126	0.762173	1
P40529	AGE2	168	_TQT[Phospho (STY)]QPPSHLLSTSR_.3	22447.2	20278.2	17141.9	17049.4		17927.3	13115.9	17993.3	6	31229.7	10196.6	15352.6	16829.1	13641.7	17430.4	19581.6	17751.7	7	1.01361	0.981275	-1	37942.5	13080.2	13911.2	10986	12007.5	14593.6	15871.8	16913.2	7	38920.2	9537.92	15959.1	13413.7	18395.8	16665.4	26702.4	19942.1	7	0.848119	0.80988	0
P40529	AGE2	168	_TQT[Phospho (STY)]QPPSHLLSTSR_.2	25591.9	16516.8	9927.96	11591.3	9671.04	12723	10741.9	13823.4	7	50185.1	5509.33	8616.6	11430.7	11272.5		13123	16689.5	6	0.828268	0.881518	1	43759.4	7900.2	10155.3	3608.02	8772.18	9478.28	12185.2	13694.1	7	43671	7218.43	14061.2	9973.36	13626.3	10462.5	17292.5	16615	7	0.824197	0.869942	0
P40529	AGE2	176	_TQTQPPSHLLS[Phospho (STY)]TSR_.2									0	5703.65							5703.65	1			-1									0	6049.88							6049.88	1			-1
P40529	AGE2	178	_TQTQPPSHLLSTS[Phospho (STY)]R_.2	56141	51883.2	20024.1	28588.4	25255.6	30522.4	41079.4	36213.4	7	88835.1		27204.9	39455.3	26100.8	29436.6	37412	41407.4	6	0.874563	0.86042	1	73259.8	23597.4	44634.8		28281	35952.8	39883.6	40934.9	6	75336.1				37154.2		45326.7	52605.6	3	0.778147	0.702488	3
P40529	AGE2	178	_TQTQPPSHLLSTS[Phospho (STY)]R_.3				14784.5				14784.5	1									0			1	23253.6							23253.6	1									0			1
P40529	AGE2	180	_S[Phospho (STY)]NTSLLNLQVSSLSK_.2			139824			336010		237917	2	106962	102548						104755	2	2.27118	0.664302	0	102734							102734	1	135640	91029.8	80190.5					102287	3	1.00437	0.996331	-2
P40529	AGE2	180	_S[Phospho (STY)]NTS[Phospho (STY)]LLNLQVSSLSK_.2	166627		192545	181474	266525		206654	202765	5	168489	99749.4		109334			195426	143250	4	1.41547	0.325254	1	69960.9	154106				136994		120354	3	146297	107295			141303		143410	134576	4	0.894317	0.815994	-1
P40529	AGE2	182	_SNT[Phospho (STY)]S[Phospho (STY)]LLNLQVSSLSK_.2						213486		213486	1			147197		109983			128590	2	1.66021	0.588587	-1					123650		139293	131471	2			75073.7	81760.4				78417	2	1.67657	0.142159	0
P40529	AGE2	183	_SNTS[Phospho (STY)]LLNLQVSSLSK_.2	150347	191247	109674	93312.9	151842	186051	163343	149403	7	137895	174235	235899	175269	201369	132910	163055	174376	7	0.856784	0.576899	0	197830	170872	175205	188698	162178	191767	198880	183633	7	245946	195343	181802	147932	179627	149977	174837	182209	7	1.00781	0.970079	0
P40529	AGE2	183	_S[Phospho (STY)]NTS[Phospho (STY)]LLNLQVSSLSK_.2	166627		192545	181474	266525		206654	202765	5	168489	99749.4		109334			195426	143250	4	1.41547	0.325254	1	69960.9	154106				136994		120354	3	146297	107295			141303		143410	134576	4	0.894317	0.815994	-1
P40529	AGE2	183	_SNT[Phospho (STY)]S[Phospho (STY)]LLNLQVSSLSK_.2						213486		213486	1			147197		109983			128590	2	1.66021	0.588587	-1					123650		139293	131471	2			75073.7	81760.4				78417	2	1.67657	0.142159	0
P40529	AGE2	231	_S[Phospho (STY)]ILSLYSK_.2	7025.22	4725.95	6992.53	5919.69	5525.67	5699.87	5238.15	5875.3	7	3207.25		4457.16	4021.91	3748.32	4615.34	4126.59	4029.43	6	1.4581	0.0133016	1	2008.87	5556.65	3701.53	3176.08	4183.35	5091.62		3953.02	6	6185.73	4326.25	3814.27	4318.59	4402.04	4622.61	4940.16	4658.52	7	0.848556	0.563849	-1
P25376	AGP1	84	_ADQGPQDEVEATQMNDLTS[Phospho (STY)]AISPSSR_.3	11037	5672.68						8354.83	2		6216.38				5161.34		5688.86	2	1.46863	0.757171	0	6720.78							6720.78	1				3874.79				3874.79	1	1.73449		0
P25376	AGP1	87	_ADQGPQDEVEATQMNDLTSAIS[Phospho (STY)]PSSR_.3	98108.3	96627.6	89183.5	85025.2	86337.8	93888.7	87985.2	91022.3	7	80446.6	79805.4	94936.9	92234.7	79664.7	77264.2	72558.1	82415.8	7	1.10443	0.21261	0	92635.9	77366.4	77232.3	83742.3	70524.8	73007.6	79510.6	79145.7	7	89743.9	81822.4	77123.5	73086.1	85980.8	73627.8	69829	78744.8	7	1.00509	0.970741	0
P25376	AGP1	87	_ADQGPQDEVEATQMNDLTSAIS[Phospho (STY)]PSSR_.2						15926.7	17585.9	16756.3	2				12509.1	13295.1			12902.1	2	1.29872	0.269317	0	31856.4	13221.7	15332.3		12279			18172.4	4		15613.8	3472.02	16159.3	19615.1		18309.8	14634	5	1.24179	0.782119	-1
P25376	AGP1	87	_ADQGPQDEVEATQMNDLTSAIS[Phospho (STY)]PSS[Phospho (STY)]R_.3						30270.5	24617.4	27443.9	2						27283.9		27283.9	1	1.00587	0.99443	1						26172.8		26172.8	1									0			1
P25376	AGP1	87	_ADQGPQDEVEATQMNDLTSAIS[Phospho (STY)]PS[Phospho (STY)]SR_.3	37626.4				36702.3			37164.3	2	32003.3		33781.7				21728	29171	3	1.27402	0.550325	-1	29571.3	23079.7		29280.7				27310.6	3	30065		24728.2				13961.7	22918.3	3	1.19165	0.737309	0
P25376	AGP1	87	_ADQGPQDEVEATQM[Oxidation (M)]NDLTSAIS[Phospho (STY)]PSSR_.3						4423.28		4423.28	1		2467.85		2637.45			3610.05	2905.12	3	1.52258	0.509055	-2		2616.2						2616.2	1				3472.96	4154.43			3813.7	2	0.686001	0.607853	-1
P25376	AGP1	89	_ADQGPQDEVEATQMNDLTSAIS[Phospho (STY)]PS[Phospho (STY)]SR_.3	37626.4				36702.3			37164.3	2	32003.3		33781.7				21728	29171	3	1.27402	0.550325	-1	29571.3	23079.7		29280.7				27310.6	3	30065		24728.2				13961.7	22918.3	3	1.19165	0.737309	0
P25376	AGP1	90	_ADQGPQDEVEATQMNDLTSAIS[Phospho (STY)]PSS[Phospho (STY)]R_.3						30270.5	24617.4	27443.9	2						27283.9		27283.9	1	1.00587	0.99443	1						26172.8		26172.8	1									0			1
P25376	AGP1	90	_ADQGPQDEVEATQMNDLTSAISPSS[Phospho (STY)]R_.3	26003		25075.9					25539.5	2				28591.8				28591.8	1	0.893244	0.504249	1		19531		19309			19293.6	19377.9	3		21304.9	19385.9		26482.4	22947.5	20405.7	22105.3	5	0.876619	0.435928	-2
P25376	AGP1	90	_ADQGPQDEVEATQM[Oxidation (M)]NDLTSAISPSS[Phospho (STY)]R_.3									0									0			0									0	6170.68							6170.68	1			-1
P25376	AGP1	101	_NES[Phospho (STY)]SDNIGANTGHK_.2	37972.7	181153	234815	219593	167486	149951	164932	165129	7	85082.2	344945	179514	151494	135162	313922	203793	201988	7	0.817521	0.744363	0	23772.3	175952	181539	165167	186149	180021	114534	146733	7	57568.7	252884	227943	249245	115258	210586	87350.1	171548	7	0.85535	0.789013	0
P25376	AGP1	101	_NES[Phospho (STY)]SDNIGANTGHK_.3				19544				19544	1	8790.37	26118.4			20040	32725.4	18002.6	21135.3	5	0.924706	0.961723	-4						12899	13594.5	13246.7	2						26431.7		26431.7	1	0.501169	0.159191	1
Q12449	AHA1	35	_LVGVEAGS[Phospho (STY)]VK_.2	10718	10078.2	8011.25	9983.46	8931.12	8791.39	8068.84	9226.04	7	8301.83	7438.31	6634.82	7162.48	6249.51	5842.64	10426.7	7436.62	7	1.24062	0.174743	0	7527.65	8248	7283.7	9752.75	8850.41	8086.13	7658.16	8200.97	7	8637.55	11411.1	10086.9	7759.73	9127.25	9643.85	10240.8	9558.17	7	0.858006	0.16544	0
Q12449	AHA1	172	_S[Phospho (STY)]SFTEIK_.2									0							4270.59	4270.59	1			-1									0									0			0
Q12449	AHA1	173	_SS[Phospho (STY)]FTEIK_.2	36769.4	34133.7	40223	39122.1	39444.9	36976.5	33229	37128.4	7	34265.1	41164.1	42081.3	43073	33890.3	43879.9	49653.3	41143.8	7	0.902404	0.409713	0	30291.9	32230.2	32364.5	32384.3	32459.1	31364.9	28505.5	31371.5	7	31470.2	38547.9	29472.9	39214.1	36039.1	36374	40069.7	35884	7	0.874248	0.106408	0
Q12449	AHA1	194	_NALPSSTS[Phospho (STY)]TSAPVSSTNK_.2	12425.1							12425.1	1									0			1									0									0			0
Q12449	AHA1	195	_NALPSSTST[Phospho (STY)]SAPVSSTNK_.2									0							6602.24	6602.24	1			-1									0									0			0
Q12449	AHA1	200	_NALPSSTSTSAPVS[Phospho (STY)]STNK_.2	9325.81							9325.81	1									0			1									0			4099.36					4099.36	1			-1
Q12449	AHA1	245	_S[Phospho (STY)]AQFFNSGPK_.2	12666.6		7861.08		7495.6	5592.4	4888.17	7700.77	5	3795.87	9921.63	7108.07	8696.17	8332.47	8771.83	3040.53	7095.23	7	1.08535	0.901922	-2	9536.89	7929.8	7155.76	5519.99	5808.4	8777.78	9314.41	7720.43	7	8759.48	7029.73	12261.9	8531.74	5222.01	6577.57	3484.37	7409.55	7	1.04196	0.925933	0
Q12449	AHA1	251	_SAQFFNS[Phospho (STY)]GPK_.2	3765.48		3594.36	3967.79	4680.25	3533.23	4795.69	4056.13	6	2445.33	3819.99	2971.79	3019.33	3020.13	4604.46	4513.84	3484.98	7	1.16389	0.528252	-1	1735.1	3822.22	2787.62		3946.64	2894.37	4199.54	3230.92	6	2076.17	4291.81	4436.43	3730.81	3245.51		2705.14	3414.31	6	0.946286	0.896918	0
Q12433	AHC1	33	_MTNVYQVT[Phospho (STY)]TPK_.2		17527.1		19294.4				18410.7	2		8983.28	7983.33		7860.8	7535.62		8090.76	4	2.27553	0.00343073	-2				15546		11385.9	9729.86	12220.6	3	16800		14535.1	13280	17151.1		8060.84	13965.4	5	0.875058	0.780457	-2
Q12433	AHC1	34	_MTNVYQVTT[Phospho (STY)]PK_.2	25409.3				16018			20713.6	2	28077.7						18022	23049.9	2	0.898645	0.919994	0									0									0			0
Q12433	AHC1	37	_S[Phospho (STY)]PQDLENNMDEPFK_.2	84469.1	62210.3	75795.3	72596.7	69768.2	63706.8	56655.5	69314.6	7	91286.5	59148.2	54613.9	56937.7	48007.1	63619.4	64537.5	62592.9	7	1.10739	0.664626	0	55084.2	56790.8	61233.9	60323.5	57904.8	54653.5	46233.6	56032.1	7	74746.4	77341.8	64016.6	64515.4	63198.9	71401.2	56210.6	67347.3	7	0.831987	0.050041	0
Q12433	AHC1	37	_S[Phospho (STY)]PQDLENNM[Oxidation (M)]DEPFK_.2	10716.4	7989.67	8578.78	12071.4	9834.28	8689.97	8152.58	9433.3	7	7942.79	5736.15	5774.41	7527.78	6647.92	9129.19	12939.4	7956.81	7	1.18556	0.561583	0	5389.96	6784.95	5731.18	6177.3	7019.48	7006.66	5775.48	6269.29	7	6281.07	7393.6	7351.13	8118.07	6629.4	10178.4	7578.79	7647.21	7	0.819814	0.147206	0
Q12433	AHC1	198	_S[Phospho (STY)]NGLLLEPSALR_.2	5674.56	7323.68	8809.94	10144.9	7948.64	8717.75	7701.78	8045.89	7	5634.15	9777.83	7566.74	8542.83	7424.75	9527.65	9161.97	8233.7	7	0.97719	0.936682	0	3539.34	7498.07	8064.65	7236.8	7109.03	7011.66	5959.02	6631.22	7		8741.75	8544.29	7330.59	7455.68	8421.11		8098.68	5	0.818803	0.28091	2
Q12433	AHC1	282	_NYS[Phospho (STY)]STC[Carbamidomethyl (C)]LTSNSGIIGK_.2			8896.92		8931.28			8914.1	2									0			2		6118.08						6118.08	1	5001.1							5001.1	1	1.22335		0
Q12433	AHC1	391	_PQS[Phospho (STY)]PINHSENHTR_.3	232.861	3199.71	1747.38	3166.55	2377.21	3035.96	2237.18	2285.26	7	169.625	4278.43	3025.29	4528.12	3722.06	4569.85	3916.86	3458.61	7	0.660747	0.434774	0		2772.98	1976.22	2037.24	2583.69	3349.32	1440.44	2359.98	6		2291.79	6017.74	3943.56	2297.92	4691.64	2933.84	3696.08	6	0.638509	0.286372	0
Q12433	AHC1	505	_KLS[Phospho (STY)]LNSSTPMEDLPLR_.3	20192.3	36502.4	15220.9		23230.9	29832.2	36647	26937.6	6	40869.3	22925.1	42653.3	32465	36299.7	18165.8	32004.5	32197.5	7	0.836636	0.66778	-1	43338.5	25418.5	23729.5	16254.8	19054.7	23392.4	39933	27303	7	57610.8	14558	22701.7	19440	42523.3	29073.5	43849.2	32822.3	7	0.831843	0.740814	0
Q12433	AHC1	505	_KLS[Phospho (STY)]LNSSTPMEDLPLR_.2	16874.1	27023.3	6871.4	6694.92	13022.2	16911.7	23270.5	15809.7	7	33313.7	16201.6	25889.1	19463.1	17059.3	8438.34	15298.2	19380.5	7	0.815755	0.745216	0	33026.1	14790.9	17930.8	5884.11	10344.6	11702.3	27302.4	17283	7	43187.4		12784.4	9050.43	27753.3	15638.8	21770.2	21697.4	6	0.796547	0.764438	1
Q12433	AHC1	505	_LS[Phospho (STY)]LNSSTPMEDLPLR_.2	26603.1	26492.2	28801.1	26497	23631.8	28927.9	26130.7	26726.3	7	22867.8	42059.6	38335.5	35523.8	30470.2	30060.8	26632	32278.5	7	0.827989	0.282034	0	21713.4	29238.8	28221.3	28137.7	29659.2	27122	25086	27025.5	7	10632.8	38057.8	32031.6	27957.5	33686.2	29829.4		28699.2	6	0.94168	0.860748	1
Q12433	AHC1	505	_KLS[Phospho (STY)]LNSSTPM[Oxidation (M)]EDLPLR_.3		3477.74	2335.04			3255.01	2774.25	2960.51	4			3891.36	4416.36	3418.89		3341.05	3766.91	4	0.785924	0.304301	0	3407.58	1570.36		315.718		1398.86	3599.65	2058.43	5	4144.33		2767.86	1268.7		1814.27	3454.54	2689.94	5	0.765233	0.748657	0
Q12433	AHC1	505	_KLS[Phospho (STY)]LNSSTPM[Oxidation (M)]EDLPLR_.2	1572.92	918.927			549.875	383.404		856.282	4	2254.14	752.57					2700.78	1902.49	3	0.450084	0.455009	1			1284.94			1123.03	1130.11	1179.36	3	3381.61				3227.19	1168.84		2592.54	3	0.454904	0.383184	0
P38013	AHP1	14	_KFPAGDY[Phospho (STY)]K_.2	11104.3	4271.01	3401.69		3883.2	7189.07	7214.15	6177.24	6	6895.31	3768.02	7721.91	10944.6	7366.24	4261.53	2415.8	6196.2	7	0.996941	0.997834	-1	11161.2	4653.8	5500.64	3482.33	3143.96	4640.39	5909.68	5498.86	7	15832		4700.54	3695.5	7179.61	2747.47	9650.75	7300.98	6	0.753166	0.715802	1
P38013	AHP1	22	_FQYIAIS[Phospho (STY)]QSDADSESC[Carbamidomethyl (C)]K_.2		49925.9				35910.7		42918.3	2					18811.7			18811.7	1	2.28147	0.654117	1		12453.5						12453.5	1									0			1
P38013	AHP1	24	_FQYIAISQS[Phospho (STY)]DADSESC[Carbamidomethyl (C)]K_.2	3404.77	50342.7		22006.3	26385.2		30287.5	26485.3	5							21458.3	21458.3	1	1.23427	0.932389	4			14708.1	33810.7	22152.6			23557.1	3		11308.4						11308.4	1	2.08315	0.692545	2
P38013	AHP1	28	_FQYIAISQSDADS[Phospho (STY)]ESC[Carbamidomethyl (C)]K_.2	1370.79	36454	14205.8	22964.4	22427.7	26285.5	32231.5	22277.1	7		11882.4	9964.35		15083.5	8075.68	20002.6	13001.7	5	1.7134	0.442953	2		10442		13484.9	16434.6		14376.1	13684.4	4	5383.83	7706.3		10555.5		14987.4	22676.1	12261.8	5	1.11602	0.883039	-1
P38013	AHP1	36	_MPQT[Phospho (STY)]VEWSK_.2	5464.02							5464.02	1		4877.06		4279.62				4578.34	2	1.19345	0.688882	-1	6598.09		6456.46		5364.75	4336.86	4312.25	5413.68	5	5594.42		4362.05	3747.94		5397.6	2113.78	4243.16	5	1.27586	0.486282	0
P38013	AHP1	40	_MPQTVEWS[Phospho (STY)]K_.2	39091.6		26000.4	8458.28	22537.6	18976.5	15637.3	21783.6	6	10632.5	42287.8	35921	40583.1	33066.3	37192.6		33280.5	6	0.654545	0.389298	0	43885.4	42113.3	33069.9	37300	24620.6	37464.2	37157.3	36515.8	7	28635.6	48267.6	49035.8	37023.3	26620.9		12412.1	33665.9	6	1.08465	0.847441	1
P38013	AHP1	116	_FAS[Phospho (STY)]DPGC[Carbamidomethyl (C)]AFTK_.2	180381	64112.5	110548	46060.1	96036.6	100734	86786	97808.3	7	43917.4	144730	117986	132882	121768	126189	32601.4	102868	7	0.950815	0.946245	0	75570	140294	119625	154041	113676	143109	157086	129057	7	141830	197194	184494	165427	91696.5	105113	80395.5	138021	7	0.935053	0.864858	0
P38013	AHP1	165	_ETNPGTDVT[Phospho (STY)]VSSVESVLAHL_.2									0									0			0				14567.9				14567.9	1									0			1
P38013	AHP1	168	_ETNPGTDVTVSS[Phospho (STY)]VESVLAHL_.2							6482.74	6482.74	1					11131.6			11131.6	1	0.582374		0		6528.59			6711.59	10018.1	9558.39	8204.17	4			3928.58					3928.58	1	2.08833	0.400297	3
P38013	AHP1	171	_ETNPGTDVTVSSVES[Phospho (STY)]VLAHL_.2		776.077				22298.8	18185.9	13753.6	3			12599.6	396.315	1305.62			4767.19	3	2.88505	0.663052	0		325.843	2414.68	20397.4	1189.25		5463.7	5958.17	5	377.984	2578.23		2368.07		1738.51	1238.79	1660.32	5	3.58857	0.600455	0
P40451	AIM20	139	_DPS[Phospho (STY)]YSFMYPLTLSR_.2	62354.5	15754.8	16304	12271.3	16785.4	13359.7	14594.3	21632	7	30874.8	4112.78	4504.21		3698.58		5728.26	9783.72	5	2.21102	0.587846	2	64020	21704.9	14450.6	17466.7	14971.6	13614.6	15496.5	23103.6	7	71794.2	10061.9	6857.02	7012.08	11623.3	9949.27	19957.5	19607.9	7	1.17828	0.907735	0
P40451	AIM20	139	_DPS[Phospho (STY)]YSFM[Oxidation (M)]YPLTLSR_.2	7630.95							7630.95	1									0			1	6776.73							6776.73	1									0			1
P40451	AIM20	140	_DPSY[Phospho (STY)]S[Phospho (STY)]FMYPLTLSR_.2									0					94117.1			94117.1	1			-1									0									0			0
P40451	AIM20	141	_DPSY[Phospho (STY)]S[Phospho (STY)]FMYPLTLSR_.2									0					94117.1			94117.1	1			-1									0									0			0
P40451	AIM20	141	_DPSYS[Phospho (STY)]FMYPLTLSR_.2									0									0			0	6342.02							6342.02	1	12619.4						5884.77	9252.11	2	0.685467	0.882372	-1
P40451	AIM20	149	_DPSYSFMYPLTLS[Phospho (STY)]R_.2	10963.6							10963.6	1	8502.94			2391.02				5446.98	2	2.01278	0.787351	-1	11690							11690	1	17765.2	7383.16			6898.65		9764.95	10453	4	1.11834	0.940357	-3
P40451	AIM20	200	_EFIDS[Phospho (STY)]LRPH_.2	1184.49	2343.53		961.02		2203.58	1412.12	1620.95	5	3386.57	6036.14	4124.47	942.068	1721.36	2080.81	6240.67	3504.58	7	0.462522	0.348165	-2	2608.82	4213.89	3266.67	654.279	1018.76	3166.74	2855	2540.6	7	4891.44		2472.73		940.009	388.66	9977.64	3734.1	5	0.680377	0.747321	2
P40563	AIM21	18	_T[Phospho (STY)]SELFPLSGSESGDIK_.2									0									0			0			1.68847e+06					1.68847e+06	1									0			1
P40563	AIM21	18	_KT[Phospho (STY)]SELFPLSGSESGDIK_.3		51390.4			17677.9	23545.9	39079.9	32923.5	4		13101.6	23843.5	27568.2	23743.3	15516.4	21052.7	20804.3	6	1.58254	0.400462	-2	16616.2	18855.3	31175.1	9120.55	17219	24077.9	41247.6	22616	7		7981.25		13383.1	24037.1	18305.1	13852.5	15511.8	5	1.45798	0.524939	2
P40563	AIM21	18	_KT[Phospho (STY)]SELFPLSGSESGDIK_.2	14782.6	36782.2		10860.4	13017.2	21082.3	30092.1	21102.8	6	26892.4	14532.2	16289.1	23424.6	15862.9	11855	18166.3	18146.1	7	1.16294	0.80492	-1	34523.3	14769.5	35134.5		15584.2	17387.5	34186.5	25264.3	6	24015.8		14984.5	10187.9	21850	14997.5	10746.2	16130.3	6	1.56626	0.317288	0
P40563	AIM21	19	_TS[Phospho (STY)]ELFPLSGSESGDIK_.2					1274009			1274009	1		1.35592e+06	1.15895e+06		893019			1.13596e+06	3	1.12152	0.873024	-2	1.17741e+06						1.22078e+06	1.1991e+06	2	802915		1.33845e+06					1.07068e+06	2	1.11994	0.869535	0
P40563	AIM21	19	_KTS[Phospho (STY)]ELFPLSGSESGDIK_.2	20692.8	59930.2	17434.6	22850.4	27809.3	45551.4	50380.8	34949.9	7	37296.1	15109.8	26264.9	29158.6	25585.6	16888.3	25627	25132.9	7	1.39061	0.528104	0	42548	22857.2	43501	12269.2		24636.6	53168.6	33163.4	6	47811.8		13589.5	13064	44891.7	17037.8	31448.6	27973.9	6	1.18551	0.815217	0
P40563	AIM21	25	_TSELFPLS[Phospho (STY)]GSESGDIK_.2		39893.5	48509	48865.8	46931.3	42657.6	34701.8	43593.2	6		46743.3					44792	45767.6	2	0.952489	0.856161	4					35953.2		35514.1	35733.7	2	41958.6				40836.2	37055.5	41491.6	40335.5	4	0.885911	0.235834	-2
P40563	AIM21	27	_TSELFPLSGS[Phospho (STY)]ESGDIK_.2	48845.3							48845.3	1									0			1	43662							43662	1									0			1
P40563	AIM21	29	_TSELFPLSGSES[Phospho (STY)]GDIK_.2									0									0			0	5293.96							5293.96	1									0			1
P40563	AIM21	36	_ANS[Phospho (STY)]EPPT[Phospho (STY)]PAGTPNVPTR_.2	169828	148936	154401	143738	138374	104644	115509	139347	7	98219.5	81994.1	79709.1	95216.9	64312.8	83109.5	104181	86677.5	7	1.60765	0.00437695	0	117910	130339	104599	105784	105433	103868	100201	109734	7	74918	94415.2	93009.6	81999.5	67946.9	85090.6	77963.3	82191.9	7	1.33509	0.00431796	0
P40563	AIM21	36	_ANS[Phospho (STY)]EPPT[Phospho (STY)]PAGT[Phospho (STY)]PNVPTR_.2	5618.68	7616.81	10648	17750.1	24781.5	23143.5	13583	14734.5	7	24435.9		13215.8	23092.4	17205.8	13970		18384	5	0.801486	0.713372	2	10386.1	21478.9	10261.1	26427.2	19400.3	20228.4	15755	17705.3	7	23633.1	26910.4	13253.8		27024.4	30194.3	10848.3	21977.4	6	0.805613	0.609826	1
P40563	AIM21	36	_ANS[Phospho (STY)]EPPTPAGTPNVPTR_.2	451275	414585	488060	479304	429897	383301	339375	426542	7	386884	378903	342338	370608	313007	381142	417445	370046	7	1.15267	0.207811	0	416041	360760	311576	353771	327849	323141	314500	343948	7		399860	371599	377172	333523	340502	315096	356292	6	0.965355	0.792445	1
P40563	AIM21	36	_ANS[Phospho (STY)]EPPTPAGTPNVPTR_.3	15833.4			3121.42				9477.43	2							1033.69	1033.69	1	9.16853	0.837851	1									0									0			0
P40563	AIM21	40	_ANS[Phospho (STY)]EPPT[Phospho (STY)]PAGTPNVPTR_.2	169828	148936	154401	143738	138374	104644	115509	139347	7	98219.5	81994.1	79709.1	95216.9	64312.8	83109.5	104181	86677.5	7	1.60765	0.00437695	0	117910	130339	104599	105784	105433	103868	100201	109734	7	74918	94415.2	93009.6	81999.5	67946.9	85090.6	77963.3	82191.9	7	1.33509	0.00431796	0
P40563	AIM21	40	_ANS[Phospho (STY)]EPPT[Phospho (STY)]PAGT[Phospho (STY)]PNVPTR_.2	5618.68	7616.81	10648	17750.1	24781.5	23143.5	13583	14734.5	7	24435.9		13215.8	23092.4	17205.8	13970		18384	5	0.801486	0.713372	2	10386.1	21478.9	10261.1	26427.2	19400.3	20228.4	15755	17705.3	7	23633.1	26910.4	13253.8		27024.4	30194.3	10848.3	21977.4	6	0.805613	0.609826	1
P40563	AIM21	44	_ANS[Phospho (STY)]EPPT[Phospho (STY)]PAGT[Phospho (STY)]PNVPTR_.2	5618.68	7616.81	10648	17750.1	24781.5	23143.5	13583	14734.5	7	24435.9		13215.8	23092.4	17205.8	13970		18384	5	0.801486	0.713372	2	10386.1	21478.9	10261.1	26427.2	19400.3	20228.4	15755	17705.3	7	23633.1	26910.4	13253.8		27024.4	30194.3	10848.3	21977.4	6	0.805613	0.609826	1
P40563	AIM21	58	_T[Phospho (STY)]MTSFESGMDQESLPK_.2	221663	144862	106304	116962	103367	104525		132947	6	157104	121162	101738	123229		106270	120056	121593	6	1.09338	0.841628	0	83861.1	114600	150247		123856		98173.2	114147	5	93381.2	141988	119014	86344.7	72826	120324	53718.6	98228.1	7	1.16206	0.676955	-2
P40563	AIM21	58	_AKT[Phospho (STY)]MTSFESGMDQESLPK_.2	17252.3			5104.28			10688	11014.8	3					8524.32			8524.32	1	1.29217	0.915404	2	17994.9	8934.7			6154.1		12787.8	11467.9	4							22994.4	22994.4	1	0.498725	0.415142	3
P40563	AIM21	58	_AKT[Phospho (STY)]MTSFESGMDQESLPK_.3	14748.2	13569.6						14158.9	2	15368.7	4212.36						9790.52	2	1.44618	0.804631	0	15921.1	6444.56			7172.65		10410.4	9987.18	4	24733.6						21651.3	23192.5	2	0.430622	0.110762	2
P40563	AIM21	58	_T[Phospho (STY)]M[Oxidation (M)]TSFESGMDQESLPK_.2	19000.8		11143.8	14321	12492.7		16838.2	14759.3	5	16618.6	11614.2	9784	14499.9	11032.6	12147	15257	12993.3	7	1.13591	0.662372	-2	12047.9	9044.87	15788.7	7102.44			13668.5	11530.5	5	7784.36	11583.3	14133.1	11013.4	11509.8	14922.2		11824.4	6	0.975146	0.954676	-1
P40563	AIM21	58	_T[Phospho (STY)]MTSFESGM[Oxidation (M)]DQESLPK_.2	20924.3						14406.6	17665.5	2					9429.09	12276.6	14245.4	11983.7	3	1.47413	0.493666	-1		10394.5					10485.2	10439.8	2		9176.77		10399.9		12076.1		10550.9	3	0.989472	0.972968	-1
P40563	AIM21	58	_T[Phospho (STY)]M[Oxidation (M)]TSFESGM[Oxidation (M)]DQESLPK_.2			903.734	5020.37				2962.05	2	1553	1331.32	2135.48	1936.42	2448.97	2824.91	6538.8	2681.27	7	1.10472	0.956225	-5		1450.84		615.27			2735.07	1600.39	3	1939.96		2385.27			3528.56	3176.88	2757.67	4	0.580342	0.427703	-1
P40563	AIM21	58	_AKT[Phospho (STY)]M[Oxidation (M)]TSFESGMDQESLPK_.3						2793.05		2793.05	1									0			1							5399.31	5399.31	1									0			1
P40563	AIM21	61	_TMTS[Phospho (STY)]FESGMDQESLPK_.2									0	32870.2							32870.2	1			-1	11823.9							11823.9	1	13340							13340	1	0.886353		0
P40563	AIM21	64	_AKTMTSFES[Phospho (STY)]GMDQESLPK_.3									0									0			0				956.661				956.661	1									0			1
P40563	AIM21	64	_TMTSFES[Phospho (STY)]GM[Oxidation (M)]DQESLPK_.2									0									0			0									0		1884.84						1884.84	1			-1
P40563	AIM21	70	_TMTSFESGMDQES[Phospho (STY)]LPK_.2	7844.87		1333.47	2644.6			1500.7	3330.91	4					2609.59			2609.59	1	1.27641	0.949909	3		3287.15	3291		3525.86		1951.01	3013.75	4		3066.34		4012.66	5143.64	2867.17	3817.41	3781.45	5	0.796984	0.521691	-1
P40563	AIM21	70	_AKTM[Oxidation (M)]TSFESGMDQES[Phospho (STY)]LPK_.2					7612.13		19706.8	13659.5	2	10324.8	22202.7		2859.65			2972.44	9589.9	4	1.42436	0.857488	-2		3539.83		2299.8		3841.99	29869.6	9887.81	4									0			4
P40563	AIM21	83	_S[Phospho (STY)]TTEELNNVM[Oxidation (M)]NNTSK_.2									0		6956.54						6956.54	1			-1		7577.23						7577.23	1	4866.06						3833.75	4349.91	2	1.74193	0.470947	-1
P40563	AIM21	84	_RST[Phospho (STY)]TEELNNVMNNTSK_.3		32596.2						32596.2	1	23383.5				12899.3		12472.1	16251.6	3	2.00572	0.480984	-2	26042.4							26042.4	1	37855.2							37855.2	1	0.687949		0
P40563	AIM21	84	_RST[Phospho (STY)]TEELNNVMNNTSK_.2						6443.62		6443.62	1	11366.8						5057.47	8212.15	2	0.784645	0.93294	-1	11716.2		6765.22		2156.92	3384.45	10334.6	6871.48	5	15101.4						7001.2	11051.3	2	0.621781	0.638357	3
P40563	AIM21	85	_STT[Phospho (STY)]EELNNVMNNTSK_.2		245875		201013	221130	184653	218342	214203	5			155609	197375		140690		164558	3	1.30168	0.21479	2						231461		231461	1			178284	160477		178468	137715	163736	4	1.41362	0.234791	-3
P40563	AIM21	85	_STT[Phospho (STY)]EELNNVM[Oxidation (M)]NNTSK_.2	25698.1							25698.1	1						8498.65		8498.65	1	3.02378		0	29433.2		12125.3		12556.9	13818.2		16983.4	4				13296.5			7952	10624.2	2	1.59856	0.688959	2
P40563	AIM21	104	_ELEEIES[Phospho (STY)]LISK_.2	20195.3	14002.6	14231.1	13888.2	13722.2	12158.4	12823.8	14431.6	7	12963	9615.59	9369.11	9483.06	8309.01	10235.7	11192	10166.8	7	1.41949	0.0375209	0	12530.6	10977.3		11097.6	12788.3	11087.5	8437.42	11153.1	6	14116.9	15560.8	10572.6	10060.6	11831.6	10962.5	11525.5	12090.1	7	0.922502	0.683478	-1
P40563	AIM21	167	_NEHEGAEGNESAIS[Phospho (STY)]PSNLVNK_.3		57173.7	17919.1		27140	39014.7	36938	35637.1	5	34652.3		30319.2	35756.1	31001.8		25114.7	31368.8	5	1.13607	0.821115	0	25054.4	20709.7	31287.6	12900.6	17621.8	22963	37137.4	23953.5	7	25072.7		12089.5	9343.24	29719.9	11073.9	30726.6	19671	6	1.21771	0.711963	1
P40563	AIM21	169	_NEHEGAEGNESAISPS[Phospho (STY)]NLVNK_.3				24477.8				24477.8	1									0			1									0									0			0
P40563	AIM21	183	_SNNEVTEHS[Phospho (STY)]DSEDLTEK_.3	84820.9	266390	296368	185056	272509	139262	403204	235373	7	127509	52169	296647	201783	122092	513154	259290	224664	7	1.04767	0.962522	0	17696.6	329493	268431	296864	460402	311031	251632	276507	7	46697.6	315382	294400	361800	205020	239655	139403	228908	7	1.20794	0.759265	0
P40563	AIM21	183	_SNNEVTEHS[Phospho (STY)]DSEDLTEK_.2	107348	160318	169556	377075	151652	86937.8	298643	193076	7	237854	322442	167326	98832.2	78926.1	392914	186971	212181	7	0.909958	0.913904	0	190413	198970	186282	174435	295620	210182	139570	199353	7	82852.2	202525	210086	274363	147142	177221	86445.8	168662	7	1.18197	0.666663	0
P40563	AIM21	183	_SNNEVTEHS[Phospho (STY)]DS[Phospho (STY)]EDLTEK_.2									0				1344.32		1188.39		1266.36	2			-2									0									0			0
P40563	AIM21	183	_SNNEVTEHS[Phospho (STY)]DSEDLTEKQK_.3									0									0			0	4158.52							4158.52	1									0			1
P40563	AIM21	185	_SNNEVTEHS[Phospho (STY)]DS[Phospho (STY)]EDLTEK_.2									0				1344.32		1188.39		1266.36	2			-2									0									0			0
P40563	AIM21	257	_HPESS[Phospho (STY)]LEELQK_.2	9647.26	13889.7					14478.8	12671.9	3	25595.3				12894.5		14065.9	17518.6	3	0.723343	0.679441	0	13386.8							13386.8	1	18659.3						18025.1	18342.2	2	0.729836	0.281172	-1
P40563	AIM21	277	_IFQNPT[Phospho (STY)]DEESTTSLNEK_.2	786880	795770	608816	869643	627032	636239	587850	701747	7	779290	331348	333412	360800	297544	370166	711532	454870	7	1.54274	0.118417	0	492956	428555	409107	665564	597674	529036	419156	506007	7	577971	633108	453843	439298	565803	648805	716258	576441	7	0.877812	0.523771	0
P40563	AIM21	277	_IFQNPT[Phospho (STY)]DEESTTSLNEK_.3	74608.8	35273.9	28486.1	46816.1	29958.5	30595.3	30704.7	39491.9	7	61639.8	16986.9		16406	12417.2	14708.6	35008	26194.4	6	1.50765	0.562082	1	41148	20896.4	20328.3	33273.6	29817.3	28349.1	18853.2	27523.7	7	46782.2	30498.8	22757.4	21020.2	27036.7	34892.2	34006.7	30999.2	7	0.887885	0.743329	0
P40563	AIM21	277	_IFQNPT[Phospho (STY)]DEESTTS[Phospho (STY)]LNEK_.2	64817.9	72002.4	58746.8	91665.5	61931.5	59218.3	53235.2	65945.4	7	63654.3	34826.3	32948.5	33796	24309.3	34967.6	63620.1	41160.3	7	1.60216	0.0709864	0	39070.2	42404.5		61860.2	56060.4	40468.2	33019.3	45480.5	6	32286.1	58502.7	37057.2	31141.3	37206.9	53565		41626.5	6	1.09258	0.809702	0
P40563	AIM21	277	_IFQNPT[Phospho (STY)]DEES[Phospho (STY)]TTS[Phospho (STY)]LNEK_.2							40259.9	40259.9	1	59824.8	30913.7					56118.4	48952.3	3	0.822432	0.883108	-2					52224.9	39139.8	31779.6	41048.1	3									0			3
P40563	AIM21	277	_IFQNPT[Phospho (STY)]DEEST[Phospho (STY)]TS[Phospho (STY)]LNEK_.2									0									0			0							6919.06	6919.06	1									0			1
P40563	AIM21	281	_IFQNPTDEES[Phospho (STY)]T[Phospho (STY)]TS[Phospho (STY)]LNEK_.2	56585.8							56585.8	1									0			1			38890.8					38890.8	1									0			1
P40563	AIM21	281	_IFQNPT[Phospho (STY)]DEES[Phospho (STY)]TTS[Phospho (STY)]LNEK_.2							40259.9	40259.9	1	59824.8	30913.7					56118.4	48952.3	3	0.822432	0.883108	-2					52224.9	39139.8	31779.6	41048.1	3									0			3
P40563	AIM21	281	_IFQNPTDEES[Phospho (STY)]TTSLNEK_.2									0									0			0									0	27117.6							27117.6	1			-1
P40563	AIM21	282	_IFQNPTDEES[Phospho (STY)]T[Phospho (STY)]TS[Phospho (STY)]LNEK_.2	56585.8							56585.8	1									0			1			38890.8					38890.8	1									0			1
P40563	AIM21	282	_IFQNPTDEEST[Phospho (STY)]T[Phospho (STY)]S[Phospho (STY)]LNEK_.2									0	55618.1				28189.7			41903.9	2			-2									0			41582.5				61609.6	51596	2			-2
P40563	AIM21	282	_IFQNPTDEEST[Phospho (STY)]TS[Phospho (STY)]LNEK_.2	14911.4	50604.9						32758.1	2	35761.6							35761.6	1	0.916014	0.981551	1		38516.9				38066.8	33660.5	36748.1	3	17152.6							17152.6	1	2.14242	0.139524	2
P40563	AIM21	282	_IFQNPTDEEST[Phospho (STY)]TSLNEK_.2						20134.2		20134.2	1						17385		17385	1	1.15814		0									0			17510.8			27198.4		22354.6	2			-2
P40563	AIM21	282	_IFQNPT[Phospho (STY)]DEEST[Phospho (STY)]TS[Phospho (STY)]LNEK_.2									0									0			0							6919.06	6919.06	1									0			1
P40563	AIM21	283	_IFQNPTDEESTT[Phospho (STY)]SLNEK_.2			109551				86710.5	98130.8	2									0			2									0	66126.4							66126.4	1			-1
P40563	AIM21	283	_IFQNPTDEEST[Phospho (STY)]T[Phospho (STY)]S[Phospho (STY)]LNEK_.2									0	55618.1				28189.7			41903.9	2			-2									0			41582.5				61609.6	51596	2			-2
P40563	AIM21	284	_IFQNPTDEESTTS[Phospho (STY)]LNEK_.2	96429.7							96429.7	1	107151	69834.4			59597			78860.7	3	1.22279	0.847752	-2	67385			103614	85858.2	78851.8		83927.2	4		99985.6					85924.2	92954.9	2	0.902881	0.771144	2
P40563	AIM21	284	_IFQNPT[Phospho (STY)]DEESTTS[Phospho (STY)]LNEK_.2	64817.9	72002.4	58746.8	91665.5	61931.5	59218.3	53235.2	65945.4	7	63654.3	34826.3	32948.5	33796	24309.3	34967.6	63620.1	41160.3	7	1.60216	0.0709864	0	39070.2	42404.5		61860.2	56060.4	40468.2	33019.3	45480.5	6	32286.1	58502.7	37057.2	31141.3	37206.9	53565		41626.5	6	1.09258	0.809702	0
P40563	AIM21	284	_IFQNPTDEES[Phospho (STY)]T[Phospho (STY)]TS[Phospho (STY)]LNEK_.2	56585.8							56585.8	1									0			1			38890.8					38890.8	1									0			1
P40563	AIM21	284	_IFQNPTDEEST[Phospho (STY)]T[Phospho (STY)]S[Phospho (STY)]LNEK_.2									0	55618.1				28189.7			41903.9	2			-2									0			41582.5				61609.6	51596	2			-2
P40563	AIM21	284	_IFQNPT[Phospho (STY)]DEES[Phospho (STY)]TTS[Phospho (STY)]LNEK_.2							40259.9	40259.9	1	59824.8	30913.7					56118.4	48952.3	3	0.822432	0.883108	-2					52224.9	39139.8	31779.6	41048.1	3									0			3
P40563	AIM21	284	_IFQNPTDEEST[Phospho (STY)]TS[Phospho (STY)]LNEK_.2	14911.4	50604.9						32758.1	2	35761.6							35761.6	1	0.916014	0.981551	1		38516.9				38066.8	33660.5	36748.1	3	17152.6							17152.6	1	2.14242	0.139524	2
P40563	AIM21	284	_IFQNPT[Phospho (STY)]DEEST[Phospho (STY)]TS[Phospho (STY)]LNEK_.2									0									0			0							6919.06	6919.06	1									0			1
P40563	AIM21	476	_KLS[Phospho (STY)]SPDTESK_.2	3346.99	9687.38	17076	20404.2	12945.9	7131.96	13368.1	11994.4	7	3458.04	13727	5354.3	3592.78	5670.52	13663.4	7887.1	7621.87	7	1.57368	0.464956	0	2977.37	12099.9	16254.3	10971.3	12585.2	12444	8795	10875.3	7	2330.79	19770.1	10393.4	16799.6	5747.26	10880.1	5839.99	10251.6	7	1.06084	0.935784	0
P40563	AIM21	477	_LSS[Phospho (STY)]PDTESK_.2					7894.46		13954.5	10924.5	2	8619.16		14860.4	21674.2	7994.58		18282.5	14286.2	5	0.764689	0.80139	-3	1394.52				4871.61		3932.64	3399.59	3				14426.3	16371.2	7801.46		12866.3	3	0.264224	0.153221	0
P40563	AIM21	477	_KLSS[Phospho (STY)]PDTESK_.2									0	4066.07							4066.07	1			-1									0	2464.03							2464.03	1			-1
P40563	AIM21	490	_LGPQDQS[Phospho (STY)]QAK_.2			1988.91			52182.9		27085.9	2	8752.15	47147.1	45836.3	50056.5	40439.7	44074.3		39384.3	6	0.687733	0.786045	-4	45244.7	51575.1	48574.7		48632.2	50463	45796.4	48381	6		62624.6	4834.3	46512.5	53514.3		57187.6	44934.7	5	1.0767	0.890441	1
P40563	AIM21	552	_VLIDTT[Phospho (STY)]PGEQAER_.2	17388.1	12586.6	13617.9	15362.2	10253.3	12084.3	12698.4	13427.2	7	14392.2	9640.29	9272.62	9247.19	8917.7	9986.66	14252.3	10815.6	7	1.24147	0.299012	0	11098.2	9834.92	10085.2	11492.5	11257.7	9586.47	9163.21	10359.7	7				9873.07		12169.2	15110.9	12384.4	3	0.836516	0.328955	4
P40563	AIM21	576	_EQS[Phospho (STY)]PNKMEAALC[Carbamidomethyl (C)]PFELDEK_.3	12181.8	3737.69			1092.63	1483.45		4623.9	4	20554.4	1531.16	4193.49	1658.07	2280.56	1101.57		5219.87	6	0.885826	0.966621	-2	12523.2	64.7429	275.725		3289.84	4196.69	361.653	3451.97	6	104542			4319.04			9821.95	39560.9	3	0.0872571	0.413036	3
P40563	AIM21	576	_EQS[Phospho (STY)]PNKMEAALC[Carbamidomethyl (C)]PFELDEK_.2	2493.88							2493.88	1	6944.22							6944.22	1	0.35913		0	3401.97							3401.97	1	23655.5							23655.5	1	0.143813		0
P40563	AIM21	620	_AIS[Phospho (STY)]EES[Phospho (STY)]LSPSEAIANR_.2	231341	131249	166037	166623	140022	130734	127926	156276	7	217665	150604	138617	144835	116742	152583	158612	154237	7	1.01322	0.972912	0	171108	150103	141687	155763	139927	146640	127881	147587	7	146835	178014	161829	159004	136506	150394	147312	154270	7	0.956676	0.682927	0
P40563	AIM21	620	_AIS[Phospho (STY)]EES[Phospho (STY)]LSPSEAIANR_.3		4125.39	3405.71	2535.86	4578.92	2805.41	3545.35	3499.44	6	5586.92		3220	3311.78	3034.33	3363.39	3851.92	3728.06	6	0.938677	0.872669	0	5133.45	3388.04	3686.44	3792.68	4091.02	3376.73	4395.13	3980.5	7	3257.94		6783.97	4173.58	2816.71	2676.26		3941.69	5	1.00985	0.983626	2
P40563	AIM21	620	_AIS[Phospho (STY)]EES[Phospho (STY)]LS[Phospho (STY)]PSEAIANR_.2	5045.1				29948.9		24780.3	19924.8	3	12720.7	18415.8	55393.9	33772.1		22552.6	16660.4	26585.9	6	0.749448	0.823037	-3	10310.8	39873.7	47026.4					32403.6	3	5113.52						18098.4	11606	2	2.79198	0.585677	1
P40563	AIM21	620	_AIS[Phospho (STY)]EES[Phospho (STY)]LSPS[Phospho (STY)]EAIANR_.2	50821.4	21647.6	29958.2	33989.7	27922.2		19988.2	30721.2	6	40424.5	20551.9	26464.5	28095.9	21054.6	25579.9	24909	26725.8	7	1.1495	0.761265	-1	38376.4	27516.7	21968.8	29020.3	26153.5	26089.9		28187.6	6	19096.1	28215.2			18130.4	24114.6	20333.9	21978	5	1.28253	0.27738	1
P40563	AIM21	620	_AIS[Phospho (STY)]EESLSPSEAIANR_.2	33496.9	30164.8	36442.2	32345.3	34555.9	29495.3	28340.4	32120.1	7	35590.2	41537.9	37205.5	38486.8	32719.7	42199.4	41431.9	38453.1	7	0.835307	0.0403718	0	34606.7	34390.2	32956.3	31238.2	31524.1	30801.4	27552.6	31867.1	7	25109.6	45366.2	38714	38540.4	33621.3	35553.4	35644.3	36078.5	7	0.883271	0.380032	0
P40563	AIM21	623	_AIS[Phospho (STY)]EES[Phospho (STY)]LSPSEAIANR_.2	231341	131249	166037	166623	140022	130734	127926	156276	7	217665	150604	138617	144835	116742	152583	158612	154237	7	1.01322	0.972912	0	171108	150103	141687	155763	139927	146640	127881	147587	7	146835	178014	161829	159004	136506	150394	147312	154270	7	0.956676	0.682927	0
P40563	AIM21	623	_AIS[Phospho (STY)]EES[Phospho (STY)]LSPSEAIANR_.3		4125.39	3405.71	2535.86	4578.92	2805.41	3545.35	3499.44	6	5586.92		3220	3311.78	3034.33	3363.39	3851.92	3728.06	6	0.938677	0.872669	0	5133.45	3388.04	3686.44	3792.68	4091.02	3376.73	4395.13	3980.5	7	3257.94		6783.97	4173.58	2816.71	2676.26		3941.69	5	1.00985	0.983626	2
P40563	AIM21	623	_AIS[Phospho (STY)]EES[Phospho (STY)]LS[Phospho (STY)]PSEAIANR_.2	5045.1				29948.9		24780.3	19924.8	3	12720.7	18415.8	55393.9	33772.1		22552.6	16660.4	26585.9	6	0.749448	0.823037	-3	10310.8	39873.7	47026.4					32403.6	3	5113.52						18098.4	11606	2	2.79198	0.585677	1
P40563	AIM21	623	_AIS[Phospho (STY)]EES[Phospho (STY)]LSPS[Phospho (STY)]EAIANR_.2	50821.4	21647.6	29958.2	33989.7	27922.2		19988.2	30721.2	6	40424.5	20551.9	26464.5	28095.9	21054.6	25579.9	24909	26725.8	7	1.1495	0.761265	-1	38376.4	27516.7	21968.8	29020.3	26153.5	26089.9		28187.6	6	19096.1	28215.2			18130.4	24114.6	20333.9	21978	5	1.28253	0.27738	1
P40563	AIM21	625	_AISEESLS[Phospho (STY)]PSEAIANR_.2	538872	435150	525590	502649	481013	439424	400036	474676	7	490707	436771	385945	423242	338050	411005	431500	416746	7	1.13901	0.256691	0	467214	464022	460481	474108	429911	431154	419497	449484	7	421590	493188	472571	458938	423250	437633	475725	454699	7	0.98853	0.881541	0
P40563	AIM21	625	_AISEESLS[Phospho (STY)]PSEAIANR_.3	11330.5		5719.05	5867.34				7638.97	3	6866.74						3786.72	5326.73	2	1.43408	0.764468	1	8833.76							8833.76	1			3307.87					3307.87	1	2.67053		0
P40563	AIM21	625	_AIS[Phospho (STY)]EES[Phospho (STY)]LS[Phospho (STY)]PSEAIANR_.2	5045.1				29948.9		24780.3	19924.8	3	12720.7	18415.8	55393.9	33772.1		22552.6	16660.4	26585.9	6	0.749448	0.823037	-3	10310.8	39873.7	47026.4					32403.6	3	5113.52						18098.4	11606	2	2.79198	0.585677	1
P40563	AIM21	627	_AIS[Phospho (STY)]EES[Phospho (STY)]LSPS[Phospho (STY)]EAIANR_.2	50821.4	21647.6	29958.2	33989.7	27922.2		19988.2	30721.2	6	40424.5	20551.9	26464.5	28095.9	21054.6	25579.9	24909	26725.8	7	1.1495	0.761265	-1	38376.4	27516.7	21968.8	29020.3	26153.5	26089.9		28187.6	6	19096.1	28215.2			18130.4	24114.6	20333.9	21978	5	1.28253	0.27738	1
P40563	AIM21	671	_ELSGGYEDVDSALHS[Phospho (STY)]EEAS[Phospho (STY)]FHS[Phospho (STY)]L_.3						11651.5		11651.5	1									0			1				17204.6				17204.6	1					9974.05			9974.05	1	1.72493		0
P40563	AIM21	675	_ELSGGYEDVDSALHSEEAS[Phospho (STY)]FHS[Phospho (STY)]L_.2			29971.8	34130.7	35850.5	34443.1	38969.6	34673.2	5		23338.2	33811.5	28810.5	25355.9	28986.8		28060.6	5	1.23565	0.150372	0					39378.2	38710.4		39044.3	2		27754.4		24018.5				25886.5	2	1.50829	0.123152	0
P40563	AIM21	675	_ELSGGYEDVDSALHSEEAS[Phospho (STY)]FHS[Phospho (STY)]L_.3		40251.1	26110	26480.2	41440	37805.5	35650	34622.8	6		21153.6	33357.4	23133.5	29994.8	22357	28440.9	26406.2	6	1.31116	0.216271	0		25712.7	17254.5	29508.3	28669.7	26851.3	29227.9	26204	6	18258.9	9586.31	5212.25	11550.1	16524	16229	16993.2	13479.1	7	1.94405	0.00756171	-1
P40563	AIM21	675	_ELSGGYEDVDSALHS[Phospho (STY)]EEAS[Phospho (STY)]FHS[Phospho (STY)]L_.3						11651.5		11651.5	1									0			1				17204.6				17204.6	1					9974.05			9974.05	1	1.72493		0
P40563	AIM21	675	_ELSGGYEDVDSALHSEEAS[Phospho (STY)]FHSL_.3		16390.8			12079.9		12337.2	13602.6	3		8051.94	14841					11446.5	2	1.18837	0.815491	1		7260.44			9318.29	10906.6	11721.4	9801.68	4									0			4
P40563	AIM21	678	_ELSGGYEDVDSALHSEEAS[Phospho (STY)]FHS[Phospho (STY)]L_.2			29971.8	34130.7	35850.5	34443.1	38969.6	34673.2	5		23338.2	33811.5	28810.5	25355.9	28986.8		28060.6	5	1.23565	0.150372	0					39378.2	38710.4		39044.3	2		27754.4		24018.5				25886.5	2	1.50829	0.123152	0
P40563	AIM21	678	_ELSGGYEDVDSALHSEEAS[Phospho (STY)]FHS[Phospho (STY)]L_.3		40251.1	26110	26480.2	41440	37805.5	35650	34622.8	6		21153.6	33357.4	23133.5	29994.8	22357	28440.9	26406.2	6	1.31116	0.216271	0		25712.7	17254.5	29508.3	28669.7	26851.3	29227.9	26204	6	18258.9	9586.31	5212.25	11550.1	16524	16229	16993.2	13479.1	7	1.94405	0.00756171	-1
P40563	AIM21	678	_ELSGGYEDVDSALHSEEASFHS[Phospho (STY)]L_.3		17672.8	6303.13	4786.05	11766.4	11248.6	12741.2	10753	6			11213.4	5985.51	9462.78	3979.99		7660.41	4	1.40371	0.642565	2			5482.65	7004.18	8376.78	9220.88	9957.71	8008.44	5	3028.33	2368.36	1969.71	3909.35	6075.89	7017	7135.19	4500.55	7	1.77944	0.101435	-2
P40563	AIM21	678	_ELSGGYEDVDSALHS[Phospho (STY)]EEAS[Phospho (STY)]FHS[Phospho (STY)]L_.3						11651.5		11651.5	1									0			1				17204.6				17204.6	1					9974.05			9974.05	1	1.72493		0
P36154	AIM29	11	_MST[Phospho (STY)]TFHDYDLEEPLTSNAR_.3	44942.7			29278.4			72190.4	48803.8	3	49770.7			58663.6			42536.2	50323.5	3	0.969802	0.973492	0					49121.9			49121.9	1	85691.8			37649.6	47021.5			56787.6	3	0.865011	0.932341	-2
P36154	AIM29	12	_MSTT[Phospho (STY)]FHDYDLEEPLTSNAR_.3		77169.2						77169.2	1			45434.5					45434.5	1	1.69847		0			77752.4					77752.4	1							63287.9	63287.9	1	1.22855		0
P36154	AIM29	16	_M[Oxidation (M)]STTFHDY[Phospho (STY)]DLEEPLTSNAR_.3		16400.4				6067.42		11233.9	2				12889.5			9630.56	11260	2	0.99768	0.999172	0			11155.3		9038.25			10096.8	2	11037.8		10063.6	7608.1	10238.8	12323.3	9283.5	10092.5	6	1.00042	0.998967	-4
P36154	AIM29	16	_MSTTFHDY[Phospho (STY)]DLEEPLTSNAR_.3			24860.8					24860.8	1									0			1									0									0			0
P36154	AIM29	16	_MSTTFHDY[Phospho (STY)]DLEEPLTSNAR_.2					3102.35		10620.9	6861.62	2	12828.4						4612.22	8720.3	2	0.786857	0.921252	0	14359.3		8242.18	4509.38	5792.15			8225.75	4	19043.6							19043.6	1	0.431942	0.374095	3
P36154	AIM29	78	_IQNEGS[Phospho (STY)]FR_.2	7194.7	9551.31	12044.7		9283.62	10195.5	8757.74	9504.6	6	3484.61	6708.12	9065.85		8716.9	8066.22	9388.22	7571.65	6	1.25529	0.417284	0	5495.1	9943.79	7183.15			8663.68	9266.17	8110.38	5	3790.79					9664.03	9789.45	7748.09	3	1.04676	0.943573	2
P38266	AIM3	463	_GAVVHQEPAPS[Phospho (STY)]GK_.2	10544.8	4928.29	6637.82	5013.56	5028.14	5431.96	6833.25	6345.4	7	4314.39	4999.47	4185.63	3307.9	3404.26	2675.06	5277.12	4023.41	7	1.57712	0.130557	0	4077.51	4715.02	4322.32	3272.79	3993.64	4268.97	3514.25	4023.5	7	5364.46	3335.24	3831.88	4475.91	2871.98	3374.56	4711.94	3995.14	7	1.0071	0.980313	0
P38266	AIM3	471	_IQPNTT[Phospho (STY)]SSAASLPAK_.2	105348	85634.6	71054.1	102123	63349.7		62381.8	81648.7	6		42118.5		33466.9		35515.1	80022.6	47780.7	4	1.70882	0.195897	2	69024.8	37795.8	43659.9	58086.2	53345.9	47127.4		51506.7	6	63753.3		50368.5	45758.8	51537.3	64184.9	67856.2	57243.1	6	0.899787	0.665666	0
P38266	AIM3	476	_IQPNTTSSAAS[Phospho (STY)]LPAK_.2									0							6510.21	6510.21	1			-1									0	28455				5511.9			16983.5	2			-2
P38266	AIM3	669	_SQS[Phospho (STY)]SNSSDSSYTIDGPEANHGR_.3	20756.8	26203.3	20633.1		20971.7		21809	22074.8	5	10881.3						11345.2	11113.2	2	1.98635	0.0229744	3	23411.2		15980.6	11297.2	13141.6	13688.1		15503.7	5			8736.1					8736.1	1	1.77468	0.578953	4
P38266	AIM3	669	_SQS[Phospho (STY)]SNSSDSSYTIDGPEANHGR_.2									0									0			0			10494.9					10494.9	1									0			1
P38266	AIM3	721	_LGDAPNS[Phospho (STY)]FIR_.2	17103.2	13823.4	16963.1	16209.8	14577.1	12481.6	12586.4	14820.7	7	14187.6	10638.5	11679.5	11141.3	9664.54	10480	14293.2	11726.4	7	1.26387	0.0906115	0	12539	11812.3	10353.7	11301.2	11933.7	12067.3	11022.8	11575.7	7	12116.5	12398.8	10037.5	13562.6	9226.55	9797.49	10626.8	11109.5	7	1.04197	0.769479	0
P38266	AIM3	729	_APT[Phospho (STY)]PPAPSR_.2	1.6966e+06	887928	1.19032e+06	1017929	988336	979079	947297	1.10107e+06	7	1.20607e+06	1378989	1.19717e+06	1.27715e+06	956127	1.2208e+06	1.07585e+06	1.18745e+06	7	0.927256	0.782116	0	1.58294e+06	928027	990041	1.0397e+06	940710	975696	989462	1.0638e+06	7	790352	1.1409e+06	1.30378e+06	1.20532e+06	925258	981167	867634	1.03063e+06	7	1.03218	0.914088	0
P38266	AIM3	729	_RAPT[Phospho (STY)]PPAPSR_.2	434848	319231	200318	235115	194933	257061	243178	269241	7	563451	251576	216055	179764	160134	181492	429930	283200	7	0.950707	0.947406	0	610722	151059	165571	196233	210608	188764	165481	241205	7	384905	180305	218279	198803	190586	196282	367315	248068	7	0.972336	0.972544	0
P38266	AIM3	729	_RAPT[Phospho (STY)]PPAPSR_.3	107164	57623	28486.7		29348.9	52133.1	40377.7	52522.2	6	89741.6	38157.4		25396.1	24051.4	33005.3	89886.7	50039.7	6	1.04961	0.964756	0	125358	20346.4	24704.9		27473	32521.4	25850	42709	6	65640.9	25483.4	35181.4	27764.8	32936.8	33382.4	61878.4	40324	7	1.05915	0.959302	-1
P38266	AIM3	805	_EAT[Phospho (STY)]GQDEVLNSITNELSHIK_.3	10763.1	62554.1	11620.2	7922.8	29287.2	34148.9	45341.5	28805.4	7	10214.3	11802.8	34896.6	14561.8	29948.9	6987.51	17627.9	18005.7	7	1.59979	0.594266	0	21770.8	16620	15137.8	10596.6	16980.1	26263.7	33810.2	20168.5	7	39973.8	7087.14		7676.54	17405.8	11540.9	31302.6	19164.5	6	1.05239	0.953044	1
P38266	AIM3	843	_DSS[Phospho (STY)]PVPSDLDEK_.2	133001	313675	296855	389666	256958	279402	311494	283007	7	204282	431442	345962	329166	278005	435276	354541	339811	7	0.832838	0.562552	0	145101	248706	284295	295665	297951	279704	240496	255988	7	222209	423513	413133	399697	342789	348712	226768	339546	7	0.753913	0.22064	0
P38266	AIM3	843	_DSS[Phospho (STY)]PVPS[Phospho (STY)]DLDEK_.2	66871.8	181051	180702	300969	161094	142067	260489	184749	7	147603	311963	254098	193493	133663	337892	234395	230444	7	0.80171	0.648047	0	116562	162759	139486	179988	217043	169138	136160	160162	7	61158.3	230268	198179	265827	258838	170198	115542	185716	7	0.862405	0.726396	0
P38266	AIM3	843	_VKDSS[Phospho (STY)]PVPS[Phospho (STY)]DLDEK_.2	248709	183371	216956	210852	201795	162305	170816	199258	7	212840	195878	179375	151211	145337	159671	213135	179635	7	1.10923	0.588859	0	219255	174362	152973	165034	146201	135853	128080	160251	7	275913	164892	178345	175048	135680	159687	205348	184987	7	0.866282	0.571631	0
P38266	AIM3	843	_VKDSS[Phospho (STY)]PVPSDLDEK_.2	112567	88072.6	63746.4	76177.1	66395.5	78746.6	85195.4	81557.3	7	163255	70666	73624.6	87101	79973.5	68788.6	95340.3	91249.8	7	0.89378	0.795968	0	101993	53131.3	71699.5	52748.7	56337.6	57010.5	62387.5	65044.1	7	165741	60164.2	88567.2	66656.6	80233.9	75266.7	120032	93808.8	7	0.693369	0.322963	0
P38266	AIM3	847	_DSS[Phospho (STY)]PVPS[Phospho (STY)]DLDEK_.2	66871.8	181051	180702	300969	161094	142067	260489	184749	7	147603	311963	254098	193493	133663	337892	234395	230444	7	0.80171	0.648047	0	116562	162759	139486	179988	217043	169138	136160	160162	7	61158.3	230268	198179	265827	258838	170198	115542	185716	7	0.862405	0.726396	0
P38266	AIM3	847	_VKDSS[Phospho (STY)]PVPS[Phospho (STY)]DLDEK_.2	248709	183371	216956	210852	201795	162305	170816	199258	7	212840	195878	179375	151211	145337	159671	213135	179635	7	1.10923	0.588859	0	219255	174362	152973	165034	146201	135853	128080	160251	7	275913	164892	178345	175048	135680	159687	205348	184987	7	0.866282	0.571631	0
P38266	AIM3	847	_DSSPVPS[Phospho (STY)]DLDEK_.2	11256.4		7790.03					9523.23	2									0			2	13021.6						8049.87	10535.7	2									0			2
P38266	AIM3	855	_YVS[Phospho (STY)]ASGS[Phospho (STY)]IT[Phospho (STY)]PPRPPPSR_.2	27422.5				37563.4			32492.9	2			119415	105343	107208			110655	3	0.293641	0.0212758	-1				89422.8			102594	96008.3	2					117175			117175	1	0.819358	0.632344	1
P38266	AIM3	857	_YVSAS[Phospho (STY)]GS[Phospho (STY)]IT[Phospho (STY)]PPRPPPSR_.2		198646				157725	223300	193224	3	137762	132773		141032			145858	139356	4	1.38655	0.153368	-1					17205.1	123545	138644	93131.4	3	13698.6							13698.6	1	6.79862	0.709244	2
P38266	AIM3	859	_YVSAS[Phospho (STY)]GS[Phospho (STY)]IT[Phospho (STY)]PPRPPPSR_.2		198646				157725	223300	193224	3	137762	132773		141032			145858	139356	4	1.38655	0.153368	-1					17205.1	123545	138644	93131.4	3	13698.6							13698.6	1	6.79862	0.709244	2
P38266	AIM3	859	_YVSASGS[Phospho (STY)]ITPPRPPPSR_.3	63785.8							63785.8	1	175778	44855	40584.6					87072.7	3	0.732558	0.939872	-2	150904					99151.7		125028	2	120428					22093.1		71260.5	2	1.75452	0.729874	0
P38266	AIM3	859	_YVS[Phospho (STY)]ASGS[Phospho (STY)]IT[Phospho (STY)]PPRPPPSR_.2	27422.5				37563.4			32492.9	2			119415	105343	107208			110655	3	0.293641	0.0212758	-1				89422.8			102594	96008.3	2					117175			117175	1	0.819358	0.632344	1
P38266	AIM3	861	_YVSAS[Phospho (STY)]GS[Phospho (STY)]IT[Phospho (STY)]PPRPPPSR_.2		198646				157725	223300	193224	3	137762	132773		141032			145858	139356	4	1.38655	0.153368	-1					17205.1	123545	138644	93131.4	3	13698.6							13698.6	1	6.79862	0.709244	2
P38266	AIM3	861	_YVSASGSIT[Phospho (STY)]PPRPPPSR_.3						168795	186510	177652	2			120508	131943	112492			121648	3	1.46039	0.0945216	-1		81162.3	120119				155211	118831	3	25753.3		87683.8		192513	94488.7	159693	112026	5	1.06074	0.955389	-2
P38266	AIM3	861	_YVS[Phospho (STY)]ASGS[Phospho (STY)]IT[Phospho (STY)]PPRPPPSR_.2	27422.5				37563.4			32492.9	2			119415	105343	107208			110655	3	0.293641	0.0212758	-1				89422.8			102594	96008.3	2					117175			117175	1	0.819358	0.632344	1
P38266	AIM3	868	_YVSASGSITPPRPPPS[Phospho (STY)]R_.3									0									0			0									0		36023.1						36023.1	1			-1
P38266	AIM3	915	_AYS[Phospho (STY)]GDISAADDNLNPFER_.2	294989	257049	299860	278460	272806	245082	233854	268872	7	242067	246926	206127	207122	183096	216495	219091	217275	7	1.23747	0.021104	0	208422	204382	183150	204764	190943	179457	177388	192644	7	190324	198350	151039	186872	179270	173620	193480	181851	7	1.05935	0.49923	0
P38266	AIM3	915	_AYS[Phospho (STY)]GDISAADDNLNPFER_.3	22421.3	7833.14	9699.87		10122.7	7016.82	6921.01	10669.1	6	17810.2	18053.8	6331.25	6253.22	6081.01	6302.39		10138.6	6	1.05232	0.962472	0	14133	8299.27			6601.84	5379.27	7452.82	8373.23	5	14739	7268.91		5812.83			5878.18	8424.73	4	0.993888	0.994211	1
Q99299	AIM44	25	_FPS[Phospho (STY)]NES[Phospho (STY)]LPR_.2	43852.5	42387.7	54317.4	51270.7	44707.7	37324.3	38588.5	44635.5	7	93288.3	128359	122826	123847	102073	130505	113880	116397	7	0.383478	5.81633e-06	0	32813.4	49361.5	45050.4	41208.1	36162.4	42013.7	35516.5	40303.7	7	63283.1	91086.1	79225.2	78871.2	78732.6	77101.7	94595.1	80413.6	7	0.501205	4.92721e-05	0
Q99299	AIM44	25	_FPS[Phospho (STY)]NESLPR_.2	15416.9							15416.9	1									0			1		18882					21464.3	20173.1	2									0			2
Q99299	AIM44	28	_FPS[Phospho (STY)]NES[Phospho (STY)]LPR_.2	43852.5	42387.7	54317.4	51270.7	44707.7	37324.3	38588.5	44635.5	7	93288.3	128359	122826	123847	102073	130505	113880	116397	7	0.383478	5.81633e-06	0	32813.4	49361.5	45050.4	41208.1	36162.4	42013.7	35516.5	40303.7	7	63283.1	91086.1	79225.2	78871.2	78732.6	77101.7	94595.1	80413.6	7	0.501205	4.92721e-05	0
Q99299	AIM44	28	_FPSNES[Phospho (STY)]LPR_.2	15767.7		23728.9	17500.1	20357.8	16630.1	21384.1	19228.1	6	42072.4	92775.5	73752.3	84622.7	70273.3	79960	51621.4	70725.4	7	0.27187	0.00100961	-1	40539.4	30470.5	28688.1	27654.7	24061.4		31306.8	30453.5	6	42470.2	64734.2		62496.8	48903.2	49266.8	47552.3	52570.6	6	0.579287	0.00640227	0
Q99299	AIM44	195	_S[Phospho (STY)]AILPSTQEAK_.2	75393.7	60284.2	65124.7	74421.1	62351.4	56994.4	51277.5	63692.4	7	92919.7	72736.7	69902.5	74123.3	57284	80490.1	87895.8	76478.9	7	0.832811	0.233001	0	41183.2	46317.9	43442.3	44295	44310.2	42928.4	39393.2	43124.3	7	46614.9	49022.7	43809.6	48030.8	39083.1	47291.2	46758.7	45801.6	7	0.941547	0.359389	0
Q99299	AIM44	224	_TIELNNS[Phospho (STY)]VVPK_.2		807.763	974.047			258.174		679.995	3	3431.87	3223.22	4253.94	3778.29	3306.37	2620.9	5000.45	3659.29	7	0.185827	0.00567531	-4		1065.89				462.699		764.295	2	384.867	1956.84	1824.44	1695.03	1310.26		1090.51	1376.99	6	0.555047	0.546736	-4
Q99299	AIM44	358	_YVS[Phospho (STY)]NLQR_.2	20869.3	14503		17559.7		16724.5	13940.9	16719.5	5									0			5	17142.8	10756.7	11626.8	10843.6	12342.9		11462.6	12362.6	6									0			6
Q99299	AIM44	368	_S[Phospho (STY)]LVPVLAPQK_.2	262872	316778	290615	409519	270104	274628	255639	297165	7	407861	282922	300349	336992	240529	361274	485451	345054	7	0.861213	0.577717	0	121550	196223	200845	203312	218854	195126	172342	186893	7	202936	289007	235617	231699	256067	318570	344756	268379	7	0.696378	0.0362333	0
Q99299	AIM44	404	_VGSNT[Phospho (STY)]PRS[Phospho (STY)]PLVSYTPSLR_.3	4580.64							4580.64	1									0			1	3968.73	2790.25						3379.49	2	8015.33						16057.1	12036.2	2	0.280777	0.462812	0
Q99299	AIM44	404	_VGSNT[Phospho (STY)]PRS[Phospho (STY)]PLVSYTPS[Phospho (STY)]LR_.3									0									0			0									0	6186.84						16548.6	11367.7	2			-2
Q99299	AIM44	407	_S[Phospho (STY)]PLVSYTPSLR_.2	369390	378854	377935	402694	387544	327873	303812	364014	7	275338	194866	196498	204964	158388	202914	273206	215168	7	1.69177	0.000566792	0	141499	285291	290942	282740	277470	237976	226048	248852	7	139026	191368	169017	165690	163253	202769	137726	166978	7	1.49033	0.0314911	0
Q99299	AIM44	407	_S[Phospho (STY)]PLVSYTPS[Phospho (STY)]LR_.2	82996.1	78066.9	81439.4	114469	76500.3	81278.6	82200.1	85278.7	7	136740	110672	117470	126993	96522.7	128127	168523	126435	7	0.674485	0.0203507	0	29372.3	58537.9	64899.6	60729.1	63695.5	57176.1	45564.4	54282.1	7	65808.3	118693	105208	103026	116424	138301	81871.8	104190	7	0.52099	0.0060951	0
Q99299	AIM44	407	_S[Phospho (STY)]PLVSYT[Phospho (STY)]PSLR_.2									0	11296.7				9003.19			10149.9	2			-2						5690.71		5690.71	1									0			1
Q99299	AIM44	407	_S[Phospho (STY)]PLVS[Phospho (STY)]YTPSLR_.2	5614.71			9901.42	6949.56			7488.56	3									0			3	4530.98	5520.07	6643				4834.32	5382.09	4			8343.93		10451.6	10544.2		9779.92	3	0.550321	0.0303587	1
Q99299	AIM44	407	_VGSNT[Phospho (STY)]PRS[Phospho (STY)]PLVSYTPSLR_.3	4580.64							4580.64	1									0			1	3968.73	2790.25						3379.49	2	8015.33						16057.1	12036.2	2	0.280777	0.462812	0
Q99299	AIM44	407	_VGSNT[Phospho (STY)]PRS[Phospho (STY)]PLVSYTPS[Phospho (STY)]LR_.3									0									0			0									0	6186.84						16548.6	11367.7	2			-2
Q99299	AIM44	407	_S[Phospho (STY)]PLVSYT[Phospho (STY)]PS[Phospho (STY)]LR_.2									0									0			0									0	10103.8							10103.8	1			-1
Q99299	AIM44	407	_S[Phospho (STY)]PLVSY[Phospho (STY)]TPS[Phospho (STY)]LR_.2	8222.72							8222.72	1									0			1									0							2893.71	2893.71	1			-1
Q99299	AIM44	411	_SPLVS[Phospho (STY)]YTPSLR_.2									0									0			0									0							1349.76	1349.76	1			-1
Q99299	AIM44	411	_S[Phospho (STY)]PLVS[Phospho (STY)]YTPSLR_.2	5614.71			9901.42	6949.56			7488.56	3									0			3	4530.98	5520.07	6643				4834.32	5382.09	4			8343.93		10451.6	10544.2		9779.92	3	0.550321	0.0303587	1
Q99299	AIM44	412	_S[Phospho (STY)]PLVSY[Phospho (STY)]TPS[Phospho (STY)]LR_.2	8222.72							8222.72	1									0			1									0							2893.71	2893.71	1			-1
Q99299	AIM44	413	_SPLVSYT[Phospho (STY)]PSLR_.2			7136.82		6149.18		5072.06	6119.36	3		25326.2		20381.9	15968.2	16649.2	4895.12	16644.1	5	0.367659	0.288481	-2	25732.9	10652.8	9257.45			11239.1	13041.6	13984.8	5	8107.82		22407.8	21359.5	12886.3	8172.84	6435.23	13228.3	6	1.05719	0.949062	-1
Q99299	AIM44	413	_S[Phospho (STY)]PLVSYT[Phospho (STY)]PSLR_.2									0	11296.7				9003.19			10149.9	2			-2						5690.71		5690.71	1									0			1
Q99299	AIM44	413	_SPLVSYT[Phospho (STY)]PS[Phospho (STY)]LR_.2					22430.6	10107.1	19105.4	17214.4	3		10931.9	20501	25104.7		4014.52		15138	4	1.13716	0.916251	-1	8487.2	24093.5			20768		22020.4	18842.3	4			31217.9	31539.5	25232.1	20064.4	7117.49	23034.3	5	0.818009	0.77453	-1
Q99299	AIM44	413	_S[Phospho (STY)]PLVSYT[Phospho (STY)]PS[Phospho (STY)]LR_.2									0									0			0									0	10103.8							10103.8	1			-1
Q99299	AIM44	415	_S[Phospho (STY)]PLVSYTPS[Phospho (STY)]LR_.2	82996.1	78066.9	81439.4	114469	76500.3	81278.6	82200.1	85278.7	7	136740	110672	117470	126993	96522.7	128127	168523	126435	7	0.674485	0.0203507	0	29372.3	58537.9	64899.6	60729.1	63695.5	57176.1	45564.4	54282.1	7	65808.3	118693	105208	103026	116424	138301	81871.8	104190	7	0.52099	0.0060951	0
Q99299	AIM44	415	_SPLVSYTPS[Phospho (STY)]LR_.2	52361	35248.4	47394.2	44081.5	41215.5	45321.9	39994.8	43659.6	7	53593.5	106636	84996.8	100765	75543.2	90638.5	50266.7	80348.6	7	0.543377	0.0166698	0	62895.1	47323.5	45007.4	44810.3	42180.3	45814.2	45928.8	47708.5	7	43956.5	84873	88291.5	81111.2	63036.8	52264.5	43315.6	65264.2	7	0.731006	0.2105	0
Q99299	AIM44	415	_SPLVSYT[Phospho (STY)]PS[Phospho (STY)]LR_.2					22430.6	10107.1	19105.4	17214.4	3		10931.9	20501	25104.7		4014.52		15138	4	1.13716	0.916251	-1	8487.2	24093.5			20768		22020.4	18842.3	4			31217.9	31539.5	25232.1	20064.4	7117.49	23034.3	5	0.818009	0.77453	-1
Q99299	AIM44	415	_VGSNT[Phospho (STY)]PRS[Phospho (STY)]PLVSYTPS[Phospho (STY)]LR_.3									0									0			0									0	6186.84						16548.6	11367.7	2			-2
Q99299	AIM44	415	_S[Phospho (STY)]PLVSYT[Phospho (STY)]PS[Phospho (STY)]LR_.2									0									0			0									0	10103.8							10103.8	1			-1
Q99299	AIM44	415	_S[Phospho (STY)]PLVSY[Phospho (STY)]TPS[Phospho (STY)]LR_.2	8222.72							8222.72	1									0			1									0							2893.71	2893.71	1			-1
Q99299	AIM44	428	_AAS[Phospho (STY)]ILTASATMTPANNK_.2	20345.6	39562.2	22578.4	23732.9	37000.5		47229.6	31741.5	6	14039.5	19907	28411.1	15253.9	48656.3	17523.6	24974.1	24109.3	7	1.31657	0.618678	-1	20664.2	25679.8	24725.9	35503.7	48136.4	41091.4	35470.7	33038.9	7	13519.8	23903.3	20995.6	17315.6	22815.4	19232.8	19646.5	19632.7	7	1.68285	0.0468681	0
Q99299	AIM44	428	_AAS[Phospho (STY)]ILT[Phospho (STY)]ASATMTPANNK_.2	17677.6	9155.85	10429.8	10820.6	9372.28	8636.66	9574.44	10809.6	7	16629.8	11549	9067.28	10158.7	8810.04	9962.96	9414.04	10798.8	7	1.001	0.998822	0	8029.22	7392.17	8402.76	7130.69	7639.63	6874.23	6471.85	7420.08	7	14843.9	11860.8	11606.7	9627.64	8333.22	11384.2	10024.1	11097.2	7	0.668643	0.0104052	0
Q99299	AIM44	431	_AAS[Phospho (STY)]ILT[Phospho (STY)]ASATMTPANNK_.2	17677.6	9155.85	10429.8	10820.6	9372.28	8636.66	9574.44	10809.6	7	16629.8	11549	9067.28	10158.7	8810.04	9962.96	9414.04	10798.8	7	1.001	0.998822	0	8029.22	7392.17	8402.76	7130.69	7639.63	6874.23	6471.85	7420.08	7	14843.9	11860.8	11606.7	9627.64	8333.22	11384.2	10024.1	11097.2	7	0.668643	0.0104052	0
Q99299	AIM44	514	_EEDEYVIDTSS[Phospho (STY)]MR_.2	126751	82738.9	96044.1	94033	88040.7	82199.8	78226.3	92576.3	7	114877	78771	75787.4	71245.7	62032.9	74387	70233.8	78190.7	7	1.18398	0.455347	0	75546.5	76345.7	70905.4	84428.4	80925.9	74309.8	63382	75120.5	7	56547.7	79921.6	65059	65886.4	56075.4	69136.3	68227.5	65836.3	7	1.14102	0.194956	0
Q99299	AIM44	514	_EEDEYVIDTSS[Phospho (STY)]M[Oxidation (M)]R_.2				14450.4	11642.4			13046.4	2									0			2							7957.01	7957.01	1		7723.22						7723.22	1	1.03027		0
Q99299	AIM44	711	_EVDELAELS[Phospho (STY)]PMR_.2	44731.8	34872.9	40281.8	39934.9	36493.3	32615.5	30857.1	37112.5	7	96383	100704	89644.1	92575.2	79348.2	95169.7	75912.6	89962.4	7	0.412533	3.03134e-06	0	40087.1	38472.4	35061.2	39197.6	33440.5	31646.3	34357.1	36037.5	7	78071.6	96665.8	80514.7	87435.3	82552.6	79671.2	84348.7	84180	7	0.4281	1.13144e-07	0
Q99299	AIM44	711	_EVDELAELS[Phospho (STY)]PM[Oxidation (M)]R_.2	2349.49	460.563	1514.03		3188.78	1196.9	1664.69	1729.08	6	9416.36	11073.1	8762.32	10845.4	10076.5	11253.7	12667	10584.9	7	0.163353	4.77304e-06	-1	3478.9	762.977	651.699	850.672	1264.45	1345.12	1135.84	1355.67	7	7850.77	10182.3	8439.05	11480.1	10068.5	11074.3	10859.4	9993.48	7	0.135655	1.26093e-06	0
Q99299	AIM44	717	_KQS[Phospho (STY)]DLS[Phospho (STY)]ITLR_.2	5907.71	8882.52	4246.54	5167.51	5629.34	5461.53	6277.93	5939.01	7	2346.8			1966.26	2191.59	2578.17	1731.03	2162.77	5	2.74602	0.00482402	2	5174.56	3365.12	4390.43	2252.3	3034.21	3863.72	4677.76	3822.59	7			553.399				1351.45	952.426	2	4.01353	0.0605931	5
Q99299	AIM44	720	_KQS[Phospho (STY)]DLS[Phospho (STY)]ITLR_.2	5907.71	8882.52	4246.54	5167.51	5629.34	5461.53	6277.93	5939.01	7	2346.8			1966.26	2191.59	2578.17	1731.03	2162.77	5	2.74602	0.00482402	2	5174.56	3365.12	4390.43	2252.3	3034.21	3863.72	4677.76	3822.59	7			553.399				1351.45	952.426	2	4.01353	0.0605931	5
Q99299	AIM44	751	_SLT[Phospho (STY)]LPVGMK_.2	260935	241411	282346	275657	236088	240861	240275	253939	7	237006	346776	284374	306312	261921	297472	259887	284821	7	0.891573	0.316965	0	176736	227910	229987	226638	216239	219491	221638	216948	7	205222	313145	337318	272782	269006	328680	290416	288081	7	0.753081	0.0241106	0
Q99299	AIM44	751	_SLT[Phospho (STY)]LPVGM[Oxidation (M)]K_.2	42873.9	34865	45454.6	53632.4	45007.1	39658.2	37134.2	42660.8	7	44024.5	49415.4	39432.7	48325.9	43115.9	51268.8	50731.7	46616.4	7	0.915145	0.549788	0	38561.4		29942.6	23979.3	28410.9	28366.9		29852.2	5	33031.5	38419.7	40236.1	45807.4	42796.4	41647.3	42532.1	40638.6	7	0.734578	0.0269209	-2
Q12480	AIM45	76	_SSYS[Phospho (STY)]C[Carbamidomethyl (C)]SNLEK_.2	6217.84							6217.84	1									0			1	1513.14	3732.61				3938.63	3279.51	3115.97	4				3911.49				3911.49	1	0.796622	0.808153	3
Q12156	AIM7	137	_LIEVSSGLEDDS[Phospho (STY)]DVEELR_.2	154458	408347	210895	229153	336126	340888	311759	284518	7	130837	175835	293292	195680	232938	167090	241399	205296	7	1.38589	0.312149	0	95283	196504	175798	301755	228002	254251	213878	209353	7	187393	190444	139418	145027	195323	186166	183915	175384	7	1.19369	0.529931	0
Q12156	AIM7	137	_LIEVSSGLEDDS[Phospho (STY)]DVEELR_.3	5397.53	12219.5			8410.02	9914.43		8985.36	4				5100.13	4962.73			5031.43	2	1.78585	0.465275	2	2731.58			7497.25	6802.16			5677	3	6789.76	3701.6			6103.6			5531.65	3	1.02627	0.978696	0
P40053	AIM9	65	_YTWGS[Phospho (STY)]WLK_.2							1788.41	1788.41	1					1651.52			1651.52	1	1.08289		0		4221.88	1449.4		3161.95		2058.53	2722.94	4		3561.23	2466.88	1697.77	2291.24			2504.28	4	1.08731	0.913586	0
P40507	AIR1	21	_DTT[Phospho (STY)]PTGSDSSSFNK_.2	263071	219776	279727	259821	247238	228807	208702	243877	7	250052	254215	239505	258242	202664	239526	232138	239477	7	1.01837	0.901573	0	301056	251802	243055	271676	230475	241627	208316	249715	7	251730	268480	263742	257340	217859	250417	269866	254205	7	0.982338	0.896538	0
P40507	AIR1	21	_DTT[Phospho (STY)]PTGS[Phospho (STY)]DSSSFNK_.2									0									0			0						20222.7		20222.7	1			19308	22608.9				20958.5	2	0.964896	0.940065	-1
P40507	AIR1	23	_DTTPT[Phospho (STY)]GSDSSSFNK_.2									0							6567.28	6567.28	1			-1									0									0			0
P40507	AIR1	25	_DTT[Phospho (STY)]PTGS[Phospho (STY)]DSSSFNK_.2									0									0			0						20222.7		20222.7	1			19308	22608.9				20958.5	2	0.964896	0.940065	-1
P40507	AIR1	25	_DTTPTGS[Phospho (STY)]DSSSFNK_.2									0				5637.38				5637.38	1			-1									0									0			0
P40507	AIR1	29	_DTTPTGSDSSS[Phospho (STY)]FNK_.2									0		6461.84						6461.84	1			-1									0									0			0
P40507	AIR1	37	_LLAPS[Phospho (STY)]IEDVDANPEELR_.2	17927.2	11767.4	9730.09	19365	9975.03	13308.1	10779.2	13264.6	7	20022	7267.04	6345.52	4835.19	4767.75	5910.24	15031.9	9168.52	7	1.44675	0.487675	0	13149.9	10606.5	8956.94	17491.5	14920.3	10894.5	6882.93	11843.2	7	20182.3	16939.5	10670.9	10423.4	16273.7	18447.2	23226.5	16594.8	7	0.713671	0.247255	0
Q12476	AIR2	15	_NTAPFVVDTAPT[Phospho (STY)]TPPDK_.2									0				110443				110443	1			-1	261534		132802					197168	2				133272				133272	1	1.47943	0.863321	1
Q12476	AIR2	16	_NTAPFVVDTAPTT[Phospho (STY)]PPDK_.2	259288		138618	140749	124415	108237		154262	5	239762					111227	117403	156130	3	0.98803	0.991654	2		143163			125094	123163	118881	127575	4	261310		138464		110164			169979	3	0.750533	0.648042	1
Q12476	AIR2	31	_LVAPSIEEVNS[Phospho (STY)]NPNELR_.2	7816.92	11021.1	8580.58	13495	7431.81	8145.34	9784.03	9467.83	7		4696.29		2858.06			13846.3	7133.55	3	1.32723	0.706864	4		8591.51		10856.2	13881.6	8703.76	8140.86	10034.8	5	9277.01	13446.9	7164.1	6543.32	9364.93	15498	16453.6	11106.8	7	0.903477	0.831335	-2
Q12476	AIR2	49	_YFGVS[Phospho (STY)]DDDKDAIK_.2	172861	216749	165292	195536	169513	174500	184328	182683	7	220836	148023	165738	182038	157768	154727	178031	172452	7	1.05933	0.731947	0	213503	164746	184768	133812	156364	150040	196729	171423	7	188710	129351	197144	157864	175577	206485	244606	185677	7	0.923234	0.726452	0
Q12476	AIR2	49	_YFGVS[Phospho (STY)]DDDKDAIK_.3	11364.1							11364.1	1	9694.75				2936.17			6315.46	2	1.79941	0.820079	-1	13771.6	8146.09	4410.25				3862.15	7547.52	4	11639.7		3565.28					7602.47	2	0.992772	0.99611	2
P38080	AKL1	10	_S[Phospho (STY)]VSAMGHPAVER_.2	61147.3	36202.2	24576.7	35041.1	24449.6	32540.8	37304.3	35894.6	7	48140.9	20420.5	20154.9	23364	17005.9	21984.6	23069.2	24877.1	7	1.44287	0.381123	0	40900.2	22376.5	35697.2	20718.1	30678.7	28259.6	23115.8	28820.9	7	49257.1	25044.3	38166.3	28271.7	24271.4	35125.9	36237	33767.7	7	0.853505	0.597131	0
P38080	AKL1	10	_S[Phospho (STY)]VSAM[Oxidation (M)]GHPAVER_.2									0									0			0									0	6624.77		1641.3					4133.03	2			-2
P38080	AKL1	10	_S[Phospho (STY)]VS[Phospho (STY)]AMGHPAVER_.2	15981.5	8634.66	7589.63	7230.28	7108.91	6162.27	9359.79	8866.72	7						646.735		646.735	1	13.71	0.289315	6	5145.58	5209.76	6315.21	5032.69	5346.64	5118.24	4070.93	5177.01	7									0			7
P38080	AKL1	12	_SVS[Phospho (STY)]AM[Oxidation (M)]GHPAVER_.2	45766.1	29856.4	33450.3	35250.4	29502.3	28242	27203.5	32753	7						334.994		334.994	1	97.7719	0.0393039	6	44568.6	14982.3	16887.8	14857	14408.4	15498.5	17686.3	19841.3	7				1304.64				1304.64	1	15.2083	0.45987	6
P38080	AKL1	12	_SVS[Phospho (STY)]AM[Oxidation (M)]GHPAVER_.3	9227.92							9227.92	1									0			1									0									0			0
P38080	AKL1	12	_SVS[Phospho (STY)]AMGHPAVER_.2	336195	241162	232263	233930	228982	232749	230196	247925	7	11937.3		4858.3	4579.04	5249.12	5226.58	5625.88	6246.03	6	39.6933	2.82277e-06	1	364514	176845	192110	161031	173714	176267	190384	204981	7	12385.1	3776.85	7953.32	6158.95	5145.02	5966.62	7794.93	7025.82	7	29.1753	0.000265629	0
P38080	AKL1	12	_SVS[Phospho (STY)]AMGHPAVER_.3	16948.3							16948.3	1									0			1	11960							11960	1									0			1
P38080	AKL1	12	_S[Phospho (STY)]VS[Phospho (STY)]AMGHPAVER_.2	15981.5	8634.66	7589.63	7230.28	7108.91	6162.27	9359.79	8866.72	7						646.735		646.735	1	13.71	0.289315	6	5145.58	5209.76	6315.21	5032.69	5346.64	5118.24	4070.93	5177.01	7									0			7
P38080	AKL1	403	_LPMNASDGHAAVS[Phospho (STY)]R_.3	187548	103802	104414	105573	105007	107751	105162	117037	7	31395.5	12302.6	12378.6	13570	12271	13280.2	14266	15637.7	7	7.48428	0.000139634	0	186479	77751.7	75259.7	66693.8	68122.5	69523.3	77741.6	88795.9	7	36127.1	14832.7	18571.7	14339.3	15759.3	16629	29262.6	20788.8	7	4.27133	0.0178697	0
P38080	AKL1	403	_LPMNASDGHAAVS[Phospho (STY)]R_.2	93192.4	38710.3	41146.1	38116.4	38684.5	41593.2	40225.5	47381.2	7	18932.2	4935.95	4266.73	4588.03	3818.21		5440.44	6996.93	6	6.77172	0.0117611	1	79261.2	30722.6	34959.9	26468.6	30057.9	25878.1	29904.6	36750.4	7	20939.1	5521.93	6476.78	6087.92	7082.35	4691.64	9622.03	8631.68	7	4.25762	0.0283348	0
P38080	AKL1	403	_LPM[Oxidation (M)]NASDGHAAVS[Phospho (STY)]R_.3	39363	35963.6	38810.8	39797.5	34694	38559.7	28111.6	36471.5	7	5161.87	2647.5		4834.96		3879.33		4130.91	4	8.82891	1.4575e-05	3	39625.6	25503.6	23381.9	21892.7	21245.2	23551	28296.6	26213.8	7	4939.23	2724.08	4503.65	5068.35	6692.93	6359.78	6302.99	5227.29	7	5.0148	8.04561e-05	0
P38080	AKL1	403	_LPM[Oxidation (M)]NASDGHAAVS[Phospho (STY)]R_.2	21943.1			9371.4	8896.89	8348.69	5491.22	10810.3	5	3898.35					606.522		2252.43	2	4.79937	0.465654	3	17477.6	5864.41	6582.49			6013.29	6460.98	8479.75	5	1662.75		1305.35	326.317	1072.49	774.011		1028.18	5	8.24732	0.0808193	0
P38080	AKL1	407	_IPS[Phospho (STY)]QNVGQELEEEK_.2	90818.4	260283	287126	288279	241478	288175	226771	240419	7	29344.4	34212	62519.1	40482.8	46110	45117.8	40981.3	42681.1	7	5.63291	0.000426362	0	179330	184893	219810	238636	175510	202549	215632	202337	7	18879.4	48648.6	50739.7	44531.2	50188.9	52043.3	34997	42861.2	7	4.72076	3.11767e-07	0
P38080	AKL1	407	_IPS[Phospho (STY)]QNVGQELEEEKESQSDQR_.3	250817	218688	172191	187823	190359	179451	166450	195111	7	50891	20345	23801.9	26000	21940.8	23165.6	24907.4	27293.1	7	7.14874	2.38979e-06	0	196579	132971	120337	127744	114102	96887.2	134845	131924	7	64206.4	20164.4	18637.1	22035.5	24597.8	26901.7	54117.1	32951.4	7	4.00358	0.000313565	0
P38080	AKL1	407	_IPS[Phospho (STY)]QNVGQELEEEKESQSDQR_.2	18929.7	12865.8	8763.48	7130.53	9383.11	9583.54	9311.3	10852.5	7	11804.6			10128.9				10966.7	2	0.989582	0.991654	5	25057.2	8673.38	11309.5	8432.44	10840.3	8981.63	9727.18	11860.2	7	9896.13							9896.13	1	1.19847	0.910713	6
P38080	AKL1	420	_IPSQNVGQELEEEKES[Phospho (STY)]QSDQR_.3	4151.36	7782.23		4164.77	4350.26	6228.71	6249.62	5487.82	6	7040.09	3913.35	2498.1	3846.8	3029.57		6349.92	4446.3	6	1.23424	0.663052	0	6228.68	4026.31	5570.45	2872.62	5391.69	4413.19	5556.36	4865.61	7	7351.27			2187.88	7203.62	5588.83	9214.57	6309.24	5	0.771189	0.537395	2
P38080	AKL1	446	_TTSNANSSGT[Phospho (STY)]ANNPQEINTIQSPGIEDK_.3	2281.49							2281.49	1									0			1									0									0			0
P38080	AKL1	458	_TTSNANSSGTANNPQEINTIQS[Phospho (STY)]PGIEDK_.3	22922	15604.9	20662.8	19101.4	16207.5	12360.1	13948.2	17258.1	7	17558.1	10670.6	10644.1	11767	8919.47	9974.57		11589	6	1.48918	0.112139	1	20092	13186.7	12422.2		11672.1	10203.9	13395.8	13495.5	6	12332.2		8723.75	8410.57	9144.47	8318.68	6262.1	8865.29	6	1.52228	0.108329	0
P38080	AKL1	471	_T[Phospho (STY)]PGELYYPSVSELDTYLDK_.3	10916.3	7088.86		4203.97			7532.52	7435.41	4		13373.4	5790.62				4961.94	8042	3	0.924572	0.947023	1	5463.2	5322.87		4457.05				5081.04	3	12839.3		4026.84		3673.36		7138.59	6919.51	4	0.734306	0.771131	-1
P38080	AKL1	495	_QS[Phospho (STY)]SDPTISEQS[Phospho (STY)]PR_.2									0	2709.78							2709.78	1			-1									0									0			0
P38080	AKL1	496	_QSS[Phospho (STY)]DPTISEQSPR_.2	210655	153557	159073	160537	140095	123383	102110	149916	7	180040	138113	114625	119454	108555	118843	150346	132854	7	1.12843	0.665574	0	179549	137778	144056	123263	125259	116632	110245	133826	7	171272	184981	146304	157137	145929	141147	303222	178570	7	0.749431	0.302905	0
P38080	AKL1	496	_QSS[Phospho (STY)]DPTISEQS[Phospho (STY)]PR_.2				5673.57			8256.71	6965.14	2				5812.85	3061.38	13718.9	9103.71	7924.21	4	0.878969	0.93242	-2			6185.06		10664.4	6873.62		7907.7	3		8011.63	10678.6	14079.9	10986.2		9806.73	10712.6	5	0.738168	0.424326	-2
P38080	AKL1	504	_QSSDPTISEQS[Phospho (STY)]PR_.2	94990.4	265556	293276	308670	262318	223621	237656	240870	7	149947	274056	224725	195586	164670	243108	262340	216348	7	1.11335	0.773862	0	113152	251407	258328	227791	211585	216013	192147	210060	7	203614	294830	265231	278251	209679	253810	269824	253606	7	0.828295	0.297684	0
P38080	AKL1	504	_QSS[Phospho (STY)]DPTISEQS[Phospho (STY)]PR_.2				5673.57			8256.71	6965.14	2				5812.85	3061.38	13718.9	9103.71	7924.21	4	0.878969	0.93242	-2			6185.06		10664.4	6873.62		7907.7	3		8011.63	10678.6	14079.9	10986.2		9806.73	10712.6	5	0.738168	0.424326	-2
P38080	AKL1	504	_QS[Phospho (STY)]SDPTISEQS[Phospho (STY)]PR_.2									0	2709.78							2709.78	1			-1									0									0			0
P38080	AKL1	511	_LNTQS[Phospho (STY)]LPQR_.2	5322.96			4684.74		2731.11		4246.27	3				2041.37	2556.81		3324.32	2640.83	3	1.60793	0.460824	0						3175.6		3175.6	1				3084.03		2721.8	4058.7	3288.17	3	0.965765	0.963179	-2
P38080	AKL1	532	_ST[Phospho (STY)]SYGAATIGSDEALANEK_.2	245587	205169	251506	282968	238422	215065	210209	235561	7	144523				91073.2	117457		117684	3	2.00163	0.00552397	4		196235	191784		198789	185392	176949	189830	5	123575		162781		152495	180706		154889	4	1.22558	0.114838	1
P38080	AKL1	538	_STSYGAAT[Phospho (STY)]IGSDEALANEK_.2			16976.4		52533.8		31471.5	33660.6	3		41099.7	42068.6	48832	35200.9			41800.3	4	0.805271	0.748791	-1					54989			54989	1		3621.98	78423.2	33181.5				38408.9	3	1.43167	0.897478	-2
P38080	AKL1	541	_STSYGAATIGS[Phospho (STY)]DEALANEK_.2	103914	78335.4	88536.8	84727.2	80866.2	74878.4	67092.1	82621.5	7	137567	134307	124897	125322	108124	127411	120345	125424	7	0.658735	0.000361862	0	103698	80860.7	68283.8	77528.2	71236.9	77330.9	74871.7	79115.7	7	87673	114573	104165	107241	101399	96997.7	93628.5	100811	7	0.784794	0.022584	0
P38080	AKL1	561	_S[Phospho (STY)]NNPFPK_.2	32361.2	26576.1	25563.2	33205.2	26155.2	27155.6	27020.5	28291	7	27519.6	27306.8	23586.9	25244.7	20686.2	24176.8	31517.4	25719.8	7	1.09997	0.51368	0	23031.5	21351.9	24555.6	24128.5	24987.2	26115.4	21204.3	23624.9	7	22938.8	31179.1	33571.2	32797.2	24358.1	31856.6	37357.5	30579.8	7	0.772566	0.0488982	0
P38080	AKL1	561	_S[Phospho (STY)]NNPFPK_.1	9651.86	607.727	453.691	1315.22	1285.52	954.307	651.29	2131.37	7	11384.4	1164.25	518.879	357.945	563.776	797.376	1709.69	2356.62	7	0.904421	0.972144	0	3685.11	1326.05	1132.84	644.416	1174.97	1260.78	378.696	1371.84	7	8102.85	1171.27	1759.28	1793.21	245.535	1197.7	1712.19	2283.15	7	0.600854	0.712429	0
P38080	AKL1	801	_NEALLIELS[Phospho (STY)]PLK_.2		2334.93	410.893		1183.96	1976.15	1969.02	1574.99	5		4514.77	9734	3784.84	14080.9	2492.22	7560.69	7027.9	6	0.224106	0.159658	-1		238.97	507.652		180.414	1215.73	1408.03	710.161	5	647.07	3706.41	3863.32	2748.19	3873.22	3011.9	2476.28	2903.77	7	0.244565	0.0291074	-2
P38080	AKL1	846	_NGVLNLS[Phospho (STY)]LNEMDLSR_.2	560.294	9127.8	2545.01	1787.8	5054.71	7475.31	6500.5	4721.63	7		2470.92	5213.59		5238.97		3696.59	4155.02	4	1.13637	0.912001	3	190.982	2354.45	2934.56		3351.7	5714.01	4785.3	3221.83	6	2942.99	2433.88	1225.32		2799.42	1262.71		2132.86	5	1.51057	0.593103	1
P38080	AKL1	853	_NGVLNLSLNEMDLS[Phospho (STY)]R_.2									0				1019.21				1019.21	1			-1									0									0			0
P38080	AKL1	985	_NDS[Phospho (STY)]PAPNSHHSYR_.3		4515.12					4762.81	4638.96	2	5345.12	5064.01	3572.23	3593.7	5122.12	2922.02	4769.58	4341.25	7	1.06858	0.887155	-5		2248.89	3223.54			1844.44	5143	3114.97	4			2905.98		5638.4	2950.38	9297.97	5198.18	4	0.599241	0.57856	0
P38080	AKL1	997	_VS[Phospho (STY)]PHASTAITENK_.2	69514.8	46668.4	36421.6	42798.7	35749.4	34988.8	37496.3	43376.8	7	94094.1	31189.8	30347	34716.4	29268.5	33433.3	46014.8	42723.4	7	1.01529	0.98439	0	64630.6	27487.7	30827.8	26598.4	30219.2	29673.8	28238.3	33953.7	7	83322.4	28021.1	34095.3	31657.8	26743.2	32285.3	62269.2	42627.7	7	0.796516	0.693463	0
P38080	AKL1	997	_VS[Phospho (STY)]PHASTAITENK_.3	10756.1	5888.36	5337.74		7087.67			7267.48	4	10167.8		4612.74		4985.02		4766.36	6132.99	4	1.18498	0.824058	0	10990	5344.62	5879.65			4750.27		6741.13	4	7855.3				5426.8		7719.76	7000.62	3	0.962934	0.960581	1
P38080	AKL1	1002	_VSPHAST[Phospho (STY)]AITENK_.3						5287.49		5287.49	1									0			1									0									0			0
P38080	AKL1	1011	_HS[Phospho (STY)]TGHELSTR_.2		10175.5		3384.53	2445.45	8444.28	11319.6	7153.86	5		11908.7	13192.2	13873	15817.5	10215.2	14129	13189.3	6	0.542399	0.0873828	-1		5560.18	8086.86	1327.94	3587.12	8071.79	10862.9	6249.46	6	22260.7		10847.4	790.355	12595.7	8024.86	6870.31	10231.6	6	0.610803	0.565419	0
P38080	AKL1	1011	_HS[Phospho (STY)]TGHELSTR_.3									0		6710.23					14323.6	10516.9	2			-2		2745.38	4966.89			7786.97		5166.41	3			8782.45					8782.45	1	0.588266	0.656155	2
P38080	AKL1	1012	_HST[Phospho (STY)]GHELSTR_.3		3613.28		2403.88				3008.58	2	1103.77					4912.88		3008.32	2	1.00008	0.99991	0					2985.55		9875.75	6430.65	2									0			2
P38080	AKL1	1048	_DKDS[Phospho (STY)]NSS[Phospho (STY)]ITISTSTPSEMR_.3	159802	115843	104583	141035	133648		125904	130136	6	226422	126170	175833	176987	142543	156782	119441	160597	7	0.810328	0.379076	-1	126917	89862.9	110841		114658	96800.6		107816	5	141644	158424	136064	112763	108654	130624	123936	130301	7	0.827435	0.196438	-2
P38080	AKL1	1048	_DKDS[Phospho (STY)]NSS[Phospho (STY)]ITISTSTPSEMR_.2	94176.8	92694.7	77653.6	72143.3	72622.5	87469	81437.4	82599.6	7	143056	90678.5	108355	95450.5	95824.6	106291	82953.3	103230	7	0.800153	0.175908	0	79192	63634.5	75972	70377.2	67754.2	74395.8	78631.9	72851.1	7	94254.1	76925.9	97276.9	79030.8	99573.9	84740.1	93258.6	89294.3	7	0.815853	0.0184979	0
P38080	AKL1	1048	_DKDS[Phospho (STY)]NSS[Phospho (STY)]ITISTSTPSEM[Oxidation (M)]R_.3									0	40414.9	27164.9		35050.9			41286.7	35979.4	4			-4			20761.5					20761.5	1									0			1
P38080	AKL1	1048	_DKDS[Phospho (STY)]NSS[Phospho (STY)]ITISTSTPSEM[Oxidation (M)]R_.2									0	55545.1	18810.3						37177.7	2			-2	32808.9							32808.9	1		17425.5						17425.5	1	1.8828		0
P38080	AKL1	1048	_DKDS[Phospho (STY)]NSSITISTSTPSEMR_.2									0									0			0									0	15977.4				25221.9			20599.6	2			-2
P38080	AKL1	1050	_DKDSNS[Phospho (STY)]S[Phospho (STY)]ITISTSTPSEM[Oxidation (M)]R_.2					13601.1		10797.7	12199.4	2		13806.6	13897.2					13851.9	2	0.880701	0.706199	0			9251.33			10444.1		9847.72	2			13922.9		13241.7		11124.5	12763	3	0.771581	0.32369	-1
P38080	AKL1	1051	_DKDS[Phospho (STY)]NSS[Phospho (STY)]ITISTSTPSEMR_.3	159802	115843	104583	141035	133648		125904	130136	6	226422	126170	175833	176987	142543	156782	119441	160597	7	0.810328	0.379076	-1	126917	89862.9	110841		114658	96800.6		107816	5	141644	158424	136064	112763	108654	130624	123936	130301	7	0.827435	0.196438	-2
P38080	AKL1	1051	_DKDS[Phospho (STY)]NSS[Phospho (STY)]ITISTSTPSEMR_.2	94176.8	92694.7	77653.6	72143.3	72622.5	87469	81437.4	82599.6	7	143056	90678.5	108355	95450.5	95824.6	106291	82953.3	103230	7	0.800153	0.175908	0	79192	63634.5	75972	70377.2	67754.2	74395.8	78631.9	72851.1	7	94254.1	76925.9	97276.9	79030.8	99573.9	84740.1	93258.6	89294.3	7	0.815853	0.0184979	0
P38080	AKL1	1051	_DKDS[Phospho (STY)]NSS[Phospho (STY)]ITISTSTPSEM[Oxidation (M)]R_.3									0	40414.9	27164.9		35050.9			41286.7	35979.4	4			-4			20761.5					20761.5	1									0			1
P38080	AKL1	1051	_DKDS[Phospho (STY)]NSS[Phospho (STY)]ITISTSTPSEM[Oxidation (M)]R_.2									0	55545.1	18810.3						37177.7	2			-2	32808.9							32808.9	1		17425.5						17425.5	1	1.8828		0
P38080	AKL1	1051	_DKDSNS[Phospho (STY)]S[Phospho (STY)]ITISTSTPSEM[Oxidation (M)]R_.2					13601.1		10797.7	12199.4	2		13806.6	13897.2					13851.9	2	0.880701	0.706199	0			9251.33			10444.1		9847.72	2			13922.9		13241.7		11124.5	12763	3	0.771581	0.32369	-1
P38080	AKL1	1055	_DKDSNSSITIS[Phospho (STY)]TSTPSEMR_.3									0							10271	10271	1			-1					7734.25			7734.25	1									0			1
P38080	AKL1	1072	_QS[Phospho (STY)]LDLER_.2	251617	342436	417203	396850	351679	328981	310543	342758	7	248912	321229	322797	300385	265711	317964	397381	310625	7	1.10345	0.624	0	196150	319199	259373	318927	280914	272186	269934	273812	7	135717	274769	259092	258729	229995	266406	269150	241980	7	1.13155	0.528358	0
P38080	AKL1	1072	_ARQS[Phospho (STY)]LDLER_.2	99355.8	196651	73743.9	87375.3	102982	144902	160777	123684	7	292631	64411.9	112713	114604	129855	100337	175821	141482	7	0.874203	0.84485	0	191243	78701.5	96740.4	37158.3	54528.2	78092.7	130325	95255.6	7	132697	24546.6	60936.2	45435	112488	61445.4	197531	90725.5	7	1.04993	0.957761	0
P38080	AKL1	1072	_ARQS[Phospho (STY)]LDLER_.3	27709.6	21556.1	1852.65	8793.82	10029	12567.7	13855.4	13766.3	7	53779.9	5711.22	7047.01	12507.8	13205.5	7495.08	13036.1	16111.8	7	0.854426	0.913052	0	30523.8	5058.01	11302.8	3754.14	6432.29	7377.3	15387.7	11405.1	7	29119.2	617.884	5984.38	4118.92	9583.55	4119.38	18900.6	10349.1	7	1.10204	0.941299	0
P38080	AKL1	1072	_ARQS[Phospho (STY)]LDLER_.1	1596.02	291.62				255.761		714.467	3	8935.57						918.816	4927.19	2	0.145005	0.618568	1	3027.88					173.701		1600.79	2	5809.66						964.582	3387.12	2	0.472611	0.821954	0
P38080	AKL1	1099	_S[Phospho (STY)]FFSVFR_.2	74108	201385	158998	196362	149457	149531	153537	154768	7	213548	137202	200002	169147	163872	197851	342322	203420	7	0.76083	0.443198	0	16078.2	101137	106337	99077.5	115013	88222.1	75768.6	85947.5	7	128744	148944	113132	136552	179161	255888	260478	174700	7	0.491972	0.0467268	0
P39010	AKR1	51	_S[Phospho (STY)]GNEEESGNEQVNHNDEAEEDPLLTR_.3	471928	866068	785588	800862	752174	740360	665344	726046	7	382942	676902	752607	642477	583239	684353	566195	612674	7	1.18505	0.412796	0	414383	541137	501964	536116	614449	567959	500770	525254	7	364833	558744	553138	541502	474902	599900	483632	510950	7	1.02799	0.88511	0
P39010	AKR1	51	_S[Phospho (STY)]GNEEESGNEQVNHNDEAEEDPLLTR_.2	143788	125861	74850.8	87393.6	77664.8	76153.1	67879.2	93370.1	7	132343	77319.9	65572.6	54577.7	63134.7	67681.6	125269	83699.9	7	1.11553	0.827785	0	113507	60578.1	72759.9	44596.2	67718.4	58829.8	59570.3	68222.8	7	105562	59395.8	74216.4	59546.9	52437.4	69018.7	64603	69254.3	7	0.985105	0.972526	0
P39010	AKR1	51	_S[Phospho (STY)]GNEEES[Phospho (STY)]GNEQVNHNDEAEEDPLLTR_.3	536698	928698	1.03068e+06	1.09522e+06	930813	853162	834078	887050	7	507306	871001	791154	617178	604677	992515	808295	741732	7	1.19592	0.478873	0	487223	802207	728210	775888	854598	838027	714649	742972	7	412598	773745	945038	930862	744937	953572	604586	766477	7	0.969334	0.923269	0
P39010	AKR1	51	_S[Phospho (STY)]GNEEES[Phospho (STY)]GNEQVNHNDEAEEDPLLTR_.2	148216	104078	109061	92297	110313	91604	92763.3	106905	7	119535	131837	70312.1	58364	71810.4	93265.7	103802	92703.7	7	1.15319	0.645345	0	144949	105317	96833	74638.6	94198.3	104917	78034.4	99841	7	123521	102452	110109	92639.4	85289.8	116798	61779.3	98941.1	7	1.0091	0.979727	0
P39010	AKR1	51	_S[Phospho (STY)]GNEEES[Phospho (STY)]GNEQVNHNDEAEEDPLLTR_.4	26297.2	35971.9			37453.4	30334.1	27922.5	31595.8	5	18487.8	37037.2	30877.7	22848.5	21089.6	34801	22948.2	26870	7	1.17588	0.595913	-2	21526.6	29500.5	25039.6	27540.3	29322.1	23934.3	28216.7	26440	7	19270.2			31325		29229		26608.1	3	0.993684	0.982909	4
P39010	AKR1	51	_AIRS[Phospho (STY)]GNEEES[Phospho (STY)]GNEQVNHNDEAEEDPLLTR_.3									0					14329.8			14329.8	1			-1									0							148961	148961	1			-1
P39010	AKR1	51	_AIRS[Phospho (STY)]GNEEES[Phospho (STY)]GNEQVNHNDEAEEDPLLTR_.4		1840.11	2587.66	1974.87				2134.21	3			2007.33		2300.06	3147.45	3676.86	2782.92	4	0.766897	0.602712	-1			1868.45					1868.45	1	7071.36				2771.6	4075.66	35014.1	12233.2	4	0.152736	0.820306	-3
P39010	AKR1	51	_AIRS[Phospho (STY)]GNEEESGNEQVNHNDEAEEDPLLTR_.3									0									0			0									0							19297.5	19297.5	1			-1
P39010	AKR1	51	_AIRS[Phospho (STY)]GNEEESGNEQVNHNDEAEEDPLLTR_.4									0									0			0									0							8385.31	8385.31	1			-1
P39010	AKR1	57	_SGNEEES[Phospho (STY)]GNEQVNHNDEAEEDPLLTR_.3	93807.8	122236	143686	121179	133068	140241	138746	127566	7	48078.3	196955	179405	154213	141112	153851	93696.8	138187	7	0.92314	0.850533	0	238412	139159	157511	131449	160416	159323	159192	163637	7	96764.7	202393	241888	189911	138142	152366	98797.8	160038	7	1.02249	0.958258	0
P39010	AKR1	57	_S[Phospho (STY)]GNEEES[Phospho (STY)]GNEQVNHNDEAEEDPLLTR_.3	536698	928698	1.03068e+06	1.09522e+06	930813	853162	834078	887050	7	507306	871001	791154	617178	604677	992515	808295	741732	7	1.19592	0.478873	0	487223	802207	728210	775888	854598	838027	714649	742972	7	412598	773745	945038	930862	744937	953572	604586	766477	7	0.969334	0.923269	0
P39010	AKR1	57	_S[Phospho (STY)]GNEEES[Phospho (STY)]GNEQVNHNDEAEEDPLLTR_.2	148216	104078	109061	92297	110313	91604	92763.3	106905	7	119535	131837	70312.1	58364	71810.4	93265.7	103802	92703.7	7	1.15319	0.645345	0	144949	105317	96833	74638.6	94198.3	104917	78034.4	99841	7	123521	102452	110109	92639.4	85289.8	116798	61779.3	98941.1	7	1.0091	0.979727	0
P39010	AKR1	57	_S[Phospho (STY)]GNEEES[Phospho (STY)]GNEQVNHNDEAEEDPLLTR_.4	26297.2	35971.9			37453.4	30334.1	27922.5	31595.8	5	18487.8	37037.2	30877.7	22848.5	21089.6	34801	22948.2	26870	7	1.17588	0.595913	-2	21526.6	29500.5	25039.6	27540.3	29322.1	23934.3	28216.7	26440	7	19270.2			31325		29229		26608.1	3	0.993684	0.982909	4
P39010	AKR1	57	_AIRS[Phospho (STY)]GNEEES[Phospho (STY)]GNEQVNHNDEAEEDPLLTR_.3									0					14329.8			14329.8	1			-1									0							148961	148961	1			-1
P39010	AKR1	57	_AIRS[Phospho (STY)]GNEEES[Phospho (STY)]GNEQVNHNDEAEEDPLLTR_.4		1840.11	2587.66	1974.87				2134.21	3			2007.33		2300.06	3147.45	3676.86	2782.92	4	0.766897	0.602712	-1			1868.45					1868.45	1	7071.36				2771.6	4075.66	35014.1	12233.2	4	0.152736	0.820306	-3
P40825	ALA1	278	_LVS[Phospho (STY)]VLQDVR_.2	4337.65	2833.01	4361.99	813.297	3859.25	4585.46	3411.64	3457.47	7	1084.77	5698.82	3786.57	4734.94	4408.22	3970.78	1927.99	3658.87	7	0.944957	0.933264	0	5577.93	7104.52	5012.27	7405.43	6254.47	6840.01	6325.4	6360.01	7	4700.21	9051.37	6744.11	6579.73	6103.37	4465.88	3437.93	5868.94	7	1.08367	0.793006	0
P40825	ALA1	285	_S[Phospho (STY)]NYDTDVFTPLFER_.2	31843.5		22309.3	5839.36	21502.5	21392	20563.9	20575.1	6		33081.4	30537.1	30511.4	28250.7	29571.3	7680.74	26605.4	6	0.773341	0.625707	0	25191.9	35950.5	31430	27791.7	27762.5	37927.2	42188	32606	7	18454.4	32054.5	33895	33779.2	28279.7	20661.6	10948.9	25439	7	1.28173	0.358799	0
P40825	ALA1	293	_SNYDTDVFT[Phospho (STY)]PLFER_.2	10661.8	12544.3	11745	9540.37	10524	9956.52	10404.4	10768	7	8264.47	11686.4	8514.32	8591.35	8314.94	6782.01	8756.07	8701.36	7	1.23751	0.0921156	0	11169.2	9837.69	9253.28	10593.8	10410.5	9918.64	12222.1	10486.5	7	11532.7	11521.1	9753.78	11002.9	10207.1	10910.9	9238.98	10595.4	7	0.989723	0.936213	0
P40825	ALA1	522	_YGS[Phospho (STY)]ANVEGTILK_.2	8770.15	3348.68	7047.17	1861.39	5751.9	5146.88	4650.32	5225.21	7		12761.5	9219.11	10863.1	7900.33	8121.41		9773.08	5	0.534654	0.0566507	2	10174.1	9563.22	9055.49	8338.62	6065.25	10452.2	10594.9	9177.69	7	6950.2	12376.9	13602.7	10336.8	7804.11	5157.05	5508.93	8819.54	7	1.04061	0.924909	0
P40825	ALA1	612	_IIAS[Phospho (STY)]FDELR_.2	4262.71	2455.13	2537.25	1454.25	3877.88	3383.05	3641.07	3087.33	7	1360.42	3206.2	2657.91	2618.96	2503.77	2509.78	2152.98	2430	7	1.27051	0.48297	0	4946.27	5483.52	5209.8	4225.43	5026.11	6591.63	5917.56	5342.9	7	3574.18	9201.42	5788.62	5806.65	6125.74	4441.33	2560.76	5356.96	7	0.997377	0.995072	0
P40825	ALA1	804	_LPFS[Phospho (STY)]PIK_.2	18560.1	51951.3	63668.9	67715.6	51779.1	49211.1	50475.7	50480.3	7	12783.8	53436.8	51277.4	58751.7	46300.6	54220.1	63486.8	48608.2	7	1.03851	0.946245	0	21762.6	57240.2	58611.7	59329.4	55569.2	58422.8	58509.8	52778	7	8588.88	81498.7	78519.1	77820.2	68486	62927.4	59754.9	62513.6	7	0.844264	0.693463	0
P40825	ALA1	904	_S[Phospho (STY)]IYLLAGNDPEGR_.2									0		17561.6		34904.4	20105.9	24365.4		24234.3	4			-4		19205.2	19939.8			18068.2	18119.9	18833.3	4			25237.9					25237.9	1	0.746231	0.0632838	3
P40825	ALA1	975	_DAVDDLES[Phospho (STY)]LFK_.2	82423.8	242836	166711	146481	211347	185782	200544	176589	7	59493.8	163989	202278	147453	186810	126723	133248	145714	7	1.21189	0.623469	0	82677.4	145127	144871	176873	170350	169120	150590	148515	7	114864	174599	115069	115989	146621	142536	175690	140767	7	1.05504	0.844704	0
P47019	ALB1	80	_KNESQNSTAVTLQNASSS[Phospho (STY)]PASITTR_.3									0									0			0									0					14085.6		15177.7	14631.6	2			-2
P47019	ALB1	80	_NESQNSTAVTLQNASSS[Phospho (STY)]PASITTR_.3									0			4814.55	5348.52	4068.22	3753.42	4716.74	4540.29	5			-5			3830.28					3830.28	1		7078.18	5373.08	7534.26		8892.38		7219.47	4	0.530548	0.397938	-3
P40047	ALD5	99	_WS[Phospho (STY)]IVEPEVR_.2	1236.63	698.805	3307.88		1939.53	2908.41	2516.05	2101.22	6		4566.95	4661.87	4681.27	4095.42	4112.24		4423.55	5	0.475007	0.0133016	1	1455.21	5804.18	4723.6	4057.11	3878.72	4892.46	5497.42	4329.82	7		6034.54	3889.06	5013.99	4189.11	3117.66		4448.87	5	0.973239	0.957223	2
P54115	ALD6	2	_T[Phospho (STY)]KLHFDTAEPVK_.3	1571.42	4223.08	2610.26	3551.56	2447.6	2727.42	1729.91	2694.47	7	2424.24	637.288	1027.13	988.26	1019.78	452.275	4423.88	1567.55	7	1.7189	0.39672	0	333.932	905.163	1274.75	1870.19	1783.65	1008.46	1034.2	1172.91	7	1718.81	1392.66		1329.56	1735.26	2129.16	3129.81	1905.88	6	0.615415	0.226236	1
P54115	ALD6	8	_LHFDT[Phospho (STY)]AEPVK_.2	1535.86	3492.53	944.878	1195.8	2960.35	3373.1	3450.33	2421.84	7	4971.8	983.256		1960.72	1980.16	1288.51	2368.23	2258.78	6	1.07219	0.9421	1	4104.76	1651.92	2227.72		557.15	1359.96	3360.48	2210.33	6	5621.61		1445.66	828.929	3167.32		4352.47	3083.2	5	0.716896	0.706767	1
P54115	ALD6	102	_LADELES[Phospho (STY)]QIDLVSSIEALDNGK_.3		9826.91			5353.78	8415.73	7068.81	7666.31	4			4613.77		6301.84		1986.98	4300.86	3	1.7825	0.346385	1				3506.13	2329.75		1934.9	2590.26	3									0			3
P54115	ALD6	210	_PAAVTPLNALYFAS[Phospho (STY)]LC[Carbamidomethyl (C)]K_.2	6312.02				2841.5		2242.71	3798.74	3	2079.26	3614.56		2011.24	3469.52	2707.39		2776.39	5	1.36823	0.705235	-2		3694.11	2334.86	2657.36		3024.63	3915	3125.19	5	8279.5	3874.83	3107.28	3095.81	2819.6	2474.48	3498.83	3878.62	7	0.805749	0.733997	-2
P54115	ALD6	231	_T[Phospho (STY)]VGAALTNDPR_.2	26040.8	7823.49	16633.6	5647.32	13712.1	11059	8927.56	12834.8	7	9066.61	22869.6	18381.8	21314.2	16672.2	18329.5	7345.64	16282.8	7	0.788246	0.6876	0	28367.1	18838.5	17770.7	18559.6	14658.3	18201.8	18334.9	19247.3	7	20102.1	25052.9	28502.2	24976.1	16498.2	13222.7	10050.8	19772.1	7	0.973454	0.951702	0
P54115	ALD6	237	_TVGAALT[Phospho (STY)]NDPR_.2							2532.06	2532.06	1	3047.63	1998.48					1928.29	2324.8	3	1.08915	0.933126	-2	3076.3							3076.3	1	2540.56				2276.64			2408.6	2	1.27721	0.522041	-1
P54115	ALD6	248	_LAFT[Phospho (STY)]GSTEVGK_.2		3565.36						3565.36	1									0			1									0									0			0
P54115	ALD6	250	_LAFTGS[Phospho (STY)]TEVGK_.2	32320.4		29578.6				25811.7	29236.9	3					26834.5		15998.5	21416.5	2	1.36516	0.546485	1	33750.9	37972.9		35424.8		34145.4		35323.5	4	24502.5	41205.5	45655.5	36514.6	31780.6			35931.8	5	0.983072	0.959911	-1
P54115	ALD6	251	_LAFTGST[Phospho (STY)]EVGK_.2			8407.79			7464.38	6024.97	7299.04	3			5595.28				7238.87	6417.08	2	1.13744	0.781913	1	7643.79		5835.1	7013.42		6797.46	5425.33	6543.02	5	7625.24		7335.92			6006.93	8557.1	7381.3	4	0.886432	0.555848	1
P54115	ALD6	256	_S[Phospho (STY)]VAVDSSESNLKK_.2	7247.31				957.37			4102.34	2	2976.46							2976.46	1	1.37826	0.958322	1	7969.2	1553.29				686.961	1050.71	2815.04	4	10847.2		1796.08					6321.66	2	0.4453	0.709244	2
P54115	ALD6	256	_S[Phospho (STY)]VAVDSSESNLK_.2	170294	61065.9	119573	45500.8	98149	95847.7	77144	95367.7	7	54958.2	161312	135958	149145	114455	137444	49367.4	114663	7	0.831723	0.748791	0	182742	139501	125115	131749	98051.5	139936	145140	137462	7	84230.3	157344	187557	161856	104961	83381.9	61198	120076	7	1.14479	0.715097	0
P54115	ALD6	256	_S[Phospho (STY)]VAVDSSESNLK_.1	49771							49771	1	45295.1	576.637						22935.9	2	2.17001	0.851548	-1	32810.9		967.772					16889.3	2	46008.9							46008.9	1	0.367088	0.762173	1
P54115	ALD6	261	_SVAVDS[Phospho (STY)]SESNLK_.2	16219.5							16219.5	1					11702.3			11702.3	1	1.38601		0	18143.8	15880.8				17151.7		17058.8	3		19354.6	19386.6	18047.3				18929.5	3	0.901173	0.298059	0
P54115	ALD6	261	_SVAVDS[Phospho (STY)]SESNLKK_.2									0									0			0							1149.64	1149.64	1									0			1
P54115	ALD6	262	_SVAVDSS[Phospho (STY)]ESNLK_.2	172332	127092	151521	153803	137492		120156	143733	6	150470	140640	125584	128425	93625.3	127238	149033	130716	7	1.09958	0.608191	-1	150057	113775	121668					128500	3	91961.2	136718		125864			122487	119257	4	1.0775	0.803026	-1
P54115	ALD6	262	_SVAVDSS[Phospho (STY)]ESNLKK_.2	14756.9	8133.03	8078				6610.46	9394.6	4	17970.5	3663.47					7929.72	9854.57	3	0.953324	0.973822	1	16115.4						5382.25	10748.8	2	17818		4221.11			3644.43		8561.17	3	1.25553	0.916145	-1
P54115	ALD6	264	_SVAVDSSES[Phospho (STY)]NLK_.2									0	5877.87	10856.1						8367	2			-2									0			78654.1					78654.1	1			-1
P54115	ALD6	264	_SVAVDSSES[Phospho (STY)]NLKK_.2			6369.05	6168.75		5140.13		5892.65	3									0			3					2133.23	3047.12		2590.17	2		2610.76					8361.75	5486.25	2	0.472121	0.722201	0
P54115	ALD6	277	_S[Phospho (STY)]AHLVFDDANIK_.2	11398.4	10846.1	8609.79	1969.89	9801.31	13511.8	16166.7	10329.2	7	9306.71	21334	23325.4	21221.7	23253.1	15951.6	5971.04	17194.8	7	0.600714	0.260994	0	24053.6	18051.9	20003.4	8177.51	11703.8	17950.5	32940	18983	7	35097.7	12629.3	22697.1	21498.8	27737	12056.4	14471.1	20883.9	7	0.908975	0.868134	0
P54115	ALD6	290	_T[Phospho (STY)]LPNLVNGIFK_.2	7418.56	1271.41	4605.86		4411.58	3567.23	2879.8	4025.74	6	1658.45	6510.35	6365.8	5582.42	5619.08	5369.92	1459.91	4652.27	7	0.865327	0.847251	-1	8904.89	7830.58	6313.37	5957.17	5653.68	9001.49	9955.16	7659.48	7	6714.04	9160.97	7934.92	6555.37	5823.18	3886.94		6679.24	6	1.14676	0.652033	1
P54115	ALD6	307	_NAGQIC[Carbamidomethyl (C)]S[Phospho (STY)]SGSR_.2	1651.67	3317.3	14675.7			8926.02	13800.9	8474.32	5	1974.38	33849.6	16839.8	17806.4	12480.1	32871.7		19303.6	6	0.439001	0.399704	-1	1000.72	18965.5	20991.7	14545.2	14122.4	19643.8	21659.4	15847	7	3181.94	39361.2	25975.3	31606	14978.7		6113.78	20202.8	6	0.784393	0.768867	1
P54115	ALD6	308	_NAGQIC[Carbamidomethyl (C)]SS[Phospho (STY)]GSR_.2									0									0			0									0						11955.3		11955.3	1			-1
P54115	ALD6	310	_NAGQIC[Carbamidomethyl (C)]SSGS[Phospho (STY)]R_.2			16070.3					16070.3	1									0			1									0									0			0
P54115	ALD6	455	_AGT[Phospho (STY)]VWINT[Phospho (STY)]YNDFDSR_.2					5440.57	3786.18		4613.38	2	3815.75							3815.75	1	1.20904	0.882099	1									0									0			0
P54115	ALD6	460	_AGT[Phospho (STY)]VWINT[Phospho (STY)]YNDFDSR_.2					5440.57	3786.18		4613.38	2	3815.75							3815.75	1	1.20904	0.882099	1									0									0			0
Q08548	ALE1	510	_DIS[Phospho (STY)]ASSPNLGGILK_.2									0	2803.09		2551.88					2677.49	2			-2									0									0			0
Q08548	ALE1	513	_DISASS[Phospho (STY)]PNLGGILK_.2	688641	617996	682632	43482.2	621589	137396	14642.4	400911	7	691378	647568	553839	37834.2	18402.2	553316	602117	443493	7	0.903984	0.93161	0	569188	39160.8	527981	581985	514285	29091.6	303340	366433	7	591434	52222.9	129788	199068	560585	574458	634300	391694	7	0.935509	0.946053	0
Q08548	ALE1	605	_MS[Phospho (STY)]FSGYSPK_.2	81867.4	531657	611720	575481	517383	549479	567522	490730	7	585950	567682	537878	545906	464914	530884	51075.1	469184	7	1.04592	0.945935	0	568534	528324	529561	590793	40381.7	474828	480909	459048	7	380406	665171	226432	163298	517161	20849.6	305417	325534	7	1.41014	0.56198	0
Q08548	ALE1	605	_MS[Phospho (STY)]FSGYSPK_.1	81400	13940.8	11359.1				14916.2	30404	4	63205.8	17551.6			11957.5		17344.4	27514.8	4	1.105	0.966178	0	59185	17698.6				11489.9		29457.9	3	36773.4	20015.4	17244.6	17792.2	17201.1	12890.6		20319.6	6	1.44973	0.728632	-3
Q08548	ALE1	605	_M[Oxidation (M)]S[Phospho (STY)]FSGYSPK_.2	69224.5	55111.2	71354.5	100709	62442.1	59122.9	61755.9	68531.5	7	55917.8	50100.7	53018.7	64919.1	47684.4	66370.5	92356.5	61481.1	7	1.11468	0.73973	0	69699.1	50050.3	50158.9	45185.7	52438	48170.9	49087.8	52113	7	42740.4	57070.3	58083.8	61462.6	60776.9	63316.9	24867.8	52617	7	0.990422	0.977601	0
Q08548	ALE1	605	_KM[Oxidation (M)]S[Phospho (STY)]FSGYSPK_.2	7020.27	20615.8	8067.15	7986.51	13535	15684.4	17603.5	12930.4	7	29201.9	6175.19	10936.1	15300.8	13225.1	11233.3	20307.1	15197.1	7	0.850846	0.810839	0	30576.7	5782.04	13052.8	2900.14		10013.2	18818.9	13524	6	33383.9		7797.82	7259.71	28688.5	8362.55	21680.5	17862.2	6	0.75713	0.774416	0
Q08548	ALE1	605	_MS[Phospho (STY)]FSGYS[Phospho (STY)]PKPISK_.2	17295.5		13051.8		11795.5			14047.6	3	22210	13533.4	12825.7	13906.7		10443.1	13186.5	14350.9	6	0.978864	0.972515	-3	14968.4	13468.2	13366.7			9688.54	10842.4	12466.9	5	16126.6	14978.1	13433.2	12604	14368.6			14302.1	5	0.87168	0.427825	0
Q08548	ALE1	605	_KMS[Phospho (STY)]FSGYS[Phospho (STY)]PK_.2									0					3907.06			3907.06	1			-1									0	4313.76					4534.59		4424.17	2			-2
Q08548	ALE1	605	_KMS[Phospho (STY)]FSGYSPK_.2	78392.1	260562	43690	56525.8	71410.2	189920	226211	132387	7	474231	68960.5	161465	137648	135941	111643	176353	180892	7	0.731859	0.76192	0	331427	91947.9	144719	24614.7	49877.5	105991	230268	139835	7	508630	27914.2	70431.7	43919.8	358411	61559.7	300303	195881	7	0.713876	0.779263	0
Q08548	ALE1	605	_KMS[Phospho (STY)]FSGYSPK_.1									0	18746.3							18746.3	1			-1									0	18772.2							18772.2	1			-1
Q08548	ALE1	610	_MS[Phospho (STY)]FSGYS[Phospho (STY)]PKPISK_.2	17295.5		13051.8		11795.5			14047.6	3	22210	13533.4	12825.7	13906.7		10443.1	13186.5	14350.9	6	0.978864	0.972515	-3	14968.4	13468.2	13366.7			9688.54	10842.4	12466.9	5	16126.6	14978.1	13433.2	12604	14368.6			14302.1	5	0.87168	0.427825	0
Q08548	ALE1	610	_KMS[Phospho (STY)]FSGYS[Phospho (STY)]PK_.2									0					3907.06			3907.06	1			-1									0	4313.76					4534.59		4424.17	2			-2
Q08548	ALE1	610	_MSFSGYS[Phospho (STY)]PK_.2									0		3811.93		2499.66	3066.58	2851.87	451.531	2536.31	5			-5	4040.95	2367.27	1304.15	949.41			2529.36	2238.23	5		3843.7	5171.26	3630.25	2281.47			3731.67	4	0.599793	0.358118	1
Q08548	ALE1	610	_M[Oxidation (M)]SFSGYS[Phospho (STY)]PK_.2	6480.9				6774.35			6627.63	2									0			2		103.996						103.996	1	2826.4							2826.4	1	0.0367944		0
P53904	ALF1	250	_DEESAEVEDVHDDVES[Phospho (STY)]DDEI_.2			2262.28	7045.86			28353.4	12553.8	3		21253.5	44096	25300.1	11836.6	29081.2	9434.54	23500.3	6	0.534199	0.630803	-3		3038.6		12652.2	14411.8	6781.58	5162.17	8409.27	5		3216.77	8763	13999.8	21160.8	4234.57		10275	5	0.818421	0.855527	0
P38179	ALG3	6	_M[Acetyl (Protein N-term)]EGEQS[Phospho (STY)]PQGEK_.2				953.843			3901.87	2427.86	2	1005.05	2613.08	2654.2	2391.63	1454.74	2913.77	1904.14	2133.8	7	1.13781	0.90524	-5		279.402			1636.8	119.796		678.668	3			1039.14	3378.86	3385.51	245.659	167.541	1643.34	5	0.41298	0.692224	-2
P43633	ALK1	76	_MRES[Phospho (STY)]DAS[Phospho (STY)]LNVTTGNNTSR_.3	10381.3	9290.44	9161.65	7461.19	10157.5	9619.12	9186.76	9322.57	7	20483.2	8992.93	10593.8	13897.2	12770.3	11570.6	10693.8	12714.6	7	0.733221	0.227666	0	9927.56	7289.77	4759.21	5958.24	5974.17	4898.78	7413.65	6603.05	7	22387.8	9276.9	10982.7	13160.5	21102.1	9959.52	13581.3	14350.1	7	0.46014	0.03232	0
P43633	ALK1	76	_MRES[Phospho (STY)]DAS[Phospho (STY)]LNVTTGNNTSR_.2	6113.5	5791.07	3379.6		3806.68	5222.25	4945.84	4876.49	6	15269.9	4968.11	7205.05	7701.98	6904.13	7565.71	6536.02	8021.56	7	0.607923	0.260386	-1	8489.31	3031.46	4162.96			3439.99	3929.39	4610.62	5	17584.8	5713.16	6738.01	5340.55	9387.52	8538.72	8753.06	8865.11	7	0.520086	0.26951	-2
P43633	ALK1	76	_MRES[Phospho (STY)]DASLNVT[Phospho (STY)]TGNNTSR_.2	6451.8							6451.8	1									0			1									0									0			0
P43633	ALK1	76	_ES[Phospho (STY)]DAS[Phospho (STY)]LNVTTGNNTSR_.2			4968.95				6253.77	5611.36	2		7966.59			6291.69			7129.14	2	0.787101	0.643134	0									0			10967.6	9745.48	10047.2			10253.4	3			-3
P43633	ALK1	79	_ESDAS[Phospho (STY)]LNVTTGNNTSR_.2	38193.6	30407.1	32754.3	30622.7	30565.2		24629.1	31195.3	6	76095	72237	76598.9	75202	56044.1	74507.1	61155.2	70262.7	7	0.443981	4.41879e-05	-1	42644.6	26333.9		23678.9	24801.4	25268.8	22029.3	27459.5	6	36527.7	43474.1	46977.6	37981.5	33637.5	38731.4	34571.2	38843	7	0.706935	0.0592203	-1
P43633	ALK1	79	_MRES[Phospho (STY)]DAS[Phospho (STY)]LNVTTGNNTSR_.3	10381.3	9290.44	9161.65	7461.19	10157.5	9619.12	9186.76	9322.57	7	20483.2	8992.93	10593.8	13897.2	12770.3	11570.6	10693.8	12714.6	7	0.733221	0.227666	0	9927.56	7289.77	4759.21	5958.24	5974.17	4898.78	7413.65	6603.05	7	22387.8	9276.9	10982.7	13160.5	21102.1	9959.52	13581.3	14350.1	7	0.46014	0.03232	0
P43633	ALK1	79	_MRES[Phospho (STY)]DAS[Phospho (STY)]LNVTTGNNTSR_.2	6113.5	5791.07	3379.6		3806.68	5222.25	4945.84	4876.49	6	15269.9	4968.11	7205.05	7701.98	6904.13	7565.71	6536.02	8021.56	7	0.607923	0.260386	-1	8489.31	3031.46	4162.96			3439.99	3929.39	4610.62	5	17584.8	5713.16	6738.01	5340.55	9387.52	8538.72	8753.06	8865.11	7	0.520086	0.26951	-2
P43633	ALK1	79	_ES[Phospho (STY)]DAS[Phospho (STY)]LNVTTGNNTSR_.2			4968.95				6253.77	5611.36	2		7966.59			6291.69			7129.14	2	0.787101	0.643134	0									0			10967.6	9745.48	10047.2			10253.4	3			-3
P43633	ALK1	83	_MRES[Phospho (STY)]DASLNVT[Phospho (STY)]TGNNTSR_.2	6451.8							6451.8	1									0			1									0									0			0
P43633	ALK1	119	_WS[Phospho (STY)]VLS[Phospho (STY)]SSFTSESHK_.2									0							2428.26	2428.26	1			-1									0		4425.48	6438.3	6088.23		7384.18		6084.05	4			-4
P43633	ALK1	122	_WS[Phospho (STY)]VLS[Phospho (STY)]SSFTSESHK_.2									0							2428.26	2428.26	1			-1									0		4425.48	6438.3	6088.23		7384.18		6084.05	4			-4
P43633	ALK1	126	_WSVLSSSFT[Phospho (STY)]S[Phospho (STY)]ESHK_.2			1554.41					1554.41	1					10146			10146	1	0.153205		0									0									0			0
P43633	ALK1	127	_WSVLSSSFT[Phospho (STY)]S[Phospho (STY)]ESHK_.2			1554.41					1554.41	1					10146			10146	1	0.153205		0									0									0			0
P43633	ALK1	170	_S[Phospho (STY)]STGLS[Phospho (STY)]LR_.2		13140.5						13140.5	1	23049	33022.9			20626.3			25566.1	3	0.513983	0.600505	-2									0									0			0
P43633	ALK1	170	_S[Phospho (STY)]ST[Phospho (STY)]GLS[Phospho (STY)]LR_.2									0	1169.17							1169.17	1			-1									0				20944.5				20944.5	1			-1
P43633	ALK1	171	_SS[Phospho (STY)]TGLSLR_.2	58370.5	50368.6		61228.7	52258.8	54598	46643.6	53911.4	6	78202.6	104126	88333.3	91030.8	75888.9	98709.5	110128	92345.6	7	0.5838	0.00103492	-1	45482.9	52915.3		55631	56457.4	56584.3		53414.2	5	116735	166883	150816		134194	157267	161699	147932	6	0.361072	7.99688e-05	-1
P43633	ALK1	171	_SS[Phospho (STY)]TGLS[Phospho (STY)]LR_.2						13023.9		13023.9	1						28600.2	33575.7	31088	2	0.418938	0.480984	-1	8150.56							8150.56	1	20893.4	37043.3			25655.1	32284.1	37040.1	30583.2	5	0.266504	0.215776	-4
P43633	ALK1	171	_SS[Phospho (STY)]T[Phospho (STY)]GLS[Phospho (STY)]LR_.2						845.986		845.986	1	833.463							833.463	1	1.01503		0					7004.92			7004.92	1									0			1
P43633	ALK1	172	_SST[Phospho (STY)]GLSLR_.2	228173	209112	202415	218675	200807	204204	193969	208194	7	195151	292724	242393	261846	206381	237873	247698	240581	7	0.865379	0.190939	0	196183	159721	171308	165649	165444	171584	166519	170915	7	279798	347962	359564	363524	278996	334078	324547	326924	7	0.522799	7.78791e-06	0
P43633	ALK1	172	_SST[Phospho (STY)]GLSLR_.1	7479.16							7479.16	1									0			1	5987.46							5987.46	1									0			1
P43633	ALK1	172	_SST[Phospho (STY)]GLS[Phospho (STY)]LR_.2	73694.7	111820	110138	123695	110476	108326	110727	106982	7	105325	176091	165394	169574	134382	172782	173059	156658	7	0.682904	0.0177703	0	58210	94817.2	97791.2	88669.4	91482	94123.1	87397.6	87498.6	7	128398	198532	215693	195737	167549	195233	182698	183406	7	0.477077	0.000125344	0
P43633	ALK1	172	_SST[Phospho (STY)]GLS[Phospho (STY)]LR_.1	12749.1	2749.68		2784.24				6094.33	3	16792.3	5286.74	5357	4619.76	4246.6	5863.63		7027.67	6	0.867191	0.933611	-3	10632.9				3197.73	4426.83		6085.82	3	22278.6	6736.83	9243.28	7340.49	5883.92		8060.3	9923.9	6	0.613249	0.678584	-3
P43633	ALK1	172	_SS[Phospho (STY)]T[Phospho (STY)]GLS[Phospho (STY)]LR_.2						845.986		845.986	1	833.463							833.463	1	1.01503		0					7004.92			7004.92	1									0			1
P43633	ALK1	172	_S[Phospho (STY)]ST[Phospho (STY)]GLS[Phospho (STY)]LR_.2									0	1169.17							1169.17	1			-1									0				20944.5				20944.5	1			-1
P43633	ALK1	175	_SST[Phospho (STY)]GLS[Phospho (STY)]LR_.2	73694.7	111820	110138	123695	110476	108326	110727	106982	7	105325	176091	165394	169574	134382	172782	173059	156658	7	0.682904	0.0177703	0	58210	94817.2	97791.2	88669.4	91482	94123.1	87397.6	87498.6	7	128398	198532	215693	195737	167549	195233	182698	183406	7	0.477077	0.000125344	0
P43633	ALK1	175	_SST[Phospho (STY)]GLS[Phospho (STY)]LR_.1	12749.1	2749.68		2784.24				6094.33	3	16792.3	5286.74	5357	4619.76	4246.6	5863.63		7027.67	6	0.867191	0.933611	-3	10632.9				3197.73	4426.83		6085.82	3	22278.6	6736.83	9243.28	7340.49	5883.92		8060.3	9923.9	6	0.613249	0.678584	-3
P43633	ALK1	175	_SSTGLS[Phospho (STY)]LR_.2	122426	97573.6	108744	105702	98279.6	85645.8	91616.3	101427	7	134633	140512	120807	122841	119466	137794	158988	133577	7	0.759311	0.0114907	0	91473	86091.7	76326.3	86316.5	84000.3	81725.9	81377.4	83901.6	7	180258	191601	200663	155540	146229	182008	176943	176178	7	0.476233	3.11046e-06	0
P43633	ALK1	175	_S[Phospho (STY)]STGLS[Phospho (STY)]LR_.2		13140.5						13140.5	1	23049	33022.9			20626.3			25566.1	3	0.513983	0.600505	-2									0									0			0
P43633	ALK1	175	_SS[Phospho (STY)]TGLS[Phospho (STY)]LR_.2						13023.9		13023.9	1						28600.2	33575.7	31088	2	0.418938	0.480984	-1	8150.56							8150.56	1	20893.4	37043.3			25655.1	32284.1	37040.1	30583.2	5	0.266504	0.215776	-4
P43633	ALK1	175	_SS[Phospho (STY)]T[Phospho (STY)]GLS[Phospho (STY)]LR_.2						845.986		845.986	1	833.463							833.463	1	1.01503		0					7004.92			7004.92	1									0			1
P43633	ALK1	175	_S[Phospho (STY)]ST[Phospho (STY)]GLS[Phospho (STY)]LR_.2									0	1169.17							1169.17	1			-1									0				20944.5				20944.5	1			-1
P43633	ALK1	212	_KNS[Phospho (STY)]SIASTSSENR_.2							1363.5	1363.5	1		3080.65			1481	3287.75	2037.17	2471.64	4	0.551658	0.684406	-3			1896.34		1840.05	2099.16	941.188	1694.18	4		4481.09	5914.03	4859.07	1896.47	5916.26		4613.38	5	0.367232	0.0850602	-1
P43633	ALK1	219	_NSSIASTSS[Phospho (STY)]ENR_.2									0					7106.48			7106.48	1			-1			7717.07					7717.07	1	2212.58		16154.5		19157.3			12508.1	3	0.616964	0.875149	-2
P43633	ALK1	251	_RPTSQPQQQQPLYNAS[Phospho (STY)]LSSR_.3									0	18333.4							18333.4	1			-1									0									0			0
P43633	ALK1	253	_RPTSQPQQQQPLYNASLS[Phospho (STY)]SR_.3									0									0			0							30484.9	30484.9	1	61974.3							61974.3	1	0.491896		0
P43633	ALK1	254	_RPTSQPQQQQPLYNASLSS[Phospho (STY)]R_.3									0									0			0									0					97044.4			97044.4	1			-1
P43633	ALK1	257	_RS[Phospho (STY)]S[Phospho (STY)]ISSTVSSSSSSK_.2	4868.71	3752.94	3115.11	2891.21	3194.63	3470.16	1927.5	3317.18	7	5241.92	4322.17	4871.79	4237.01	4155.38	4484.11	3641.99	4422.05	7	0.750145	0.119434	0	4382.39	2550.5	3190.17	1941.03	1482.37	2478.79	2296.9	2617.45	7	5855.5	5521.69	6322.35	6010.14	5794.7	5308.77	4013.39	5546.65	7	0.471898	0.000768116	0
P43633	ALK1	257	_S[Phospho (STY)]SISS[Phospho (STY)]TVS[Phospho (STY)]SSSSSK_.2									0									0			0									0						14973.3		14973.3	1			-1
P43633	ALK1	258	_SS[Phospho (STY)]ISS[Phospho (STY)]TVSSSSSSK_.2	27897.3							27897.3	1	30371.9	37056.5		34785		34111.4		34081.2	4	0.818553	0.46706	-3			20532.4			19297		19914.7	2		53572.4	52101	45469.2		53215.8	24429.7	45757.6	5	0.435222	0.192644	-3
P43633	ALK1	258	_RS[Phospho (STY)]S[Phospho (STY)]ISSTVSSSSSSK_.2	4868.71	3752.94	3115.11	2891.21	3194.63	3470.16	1927.5	3317.18	7	5241.92	4322.17	4871.79	4237.01	4155.38	4484.11	3641.99	4422.05	7	0.750145	0.119434	0	4382.39	2550.5	3190.17	1941.03	1482.37	2478.79	2296.9	2617.45	7	5855.5	5521.69	6322.35	6010.14	5794.7	5308.77	4013.39	5546.65	7	0.471898	0.000768116	0
P43633	ALK1	258	_RSS[Phospho (STY)]ISS[Phospho (STY)]TVSSSSSSK_.2									0									0			0									0	3024.95						4945.54	3985.25	2			-2
P43633	ALK1	258	_SS[Phospho (STY)]ISSTVSSSSSSK_.2	46393.4							46393.4	1	47692.9							47692.9	1	0.972752		0									0	48554.6							48554.6	1			-1
P43633	ALK1	261	_SS[Phospho (STY)]ISS[Phospho (STY)]TVSSSSSSK_.2	27897.3							27897.3	1	30371.9	37056.5		34785		34111.4		34081.2	4	0.818553	0.46706	-3			20532.4			19297		19914.7	2		53572.4	52101	45469.2		53215.8	24429.7	45757.6	5	0.435222	0.192644	-3
P43633	ALK1	261	_SSISS[Phospho (STY)]TVS[Phospho (STY)]SSSSSK_.2									0				6532.26	4543.5			5537.88	2			-2									0			11886.8		6163.15			9025	2			-2
P43633	ALK1	261	_SSISS[Phospho (STY)]T[Phospho (STY)]VSSSSSSK_.2	5651.77		3496.64				3101.12	4083.18	3		6901.73						6901.73	1	0.591616	0.573702	2	9400.71						4540.32	6970.52	2	5525.08			9595.57				7560.32	2	0.921987	0.952926	0
P43633	ALK1	261	_RSS[Phospho (STY)]ISS[Phospho (STY)]TVSSSSSSK_.2									0									0			0									0	3024.95						4945.54	3985.25	2			-2
P43633	ALK1	261	_S[Phospho (STY)]SISS[Phospho (STY)]TVS[Phospho (STY)]SSSSSK_.2									0									0			0									0						14973.3		14973.3	1			-1
P43633	ALK1	262	_SSISS[Phospho (STY)]T[Phospho (STY)]VSSSSSSK_.2	5651.77		3496.64				3101.12	4083.18	3		6901.73						6901.73	1	0.591616	0.573702	2	9400.71						4540.32	6970.52	2	5525.08			9595.57				7560.32	2	0.921987	0.952926	0
P43633	ALK1	264	_SSISS[Phospho (STY)]TVS[Phospho (STY)]SSSSSK_.2									0				6532.26	4543.5			5537.88	2			-2									0			11886.8		6163.15			9025	2			-2
P43633	ALK1	264	_S[Phospho (STY)]SISS[Phospho (STY)]TVS[Phospho (STY)]SSSSSK_.2									0									0			0									0						14973.3		14973.3	1			-1
P43633	ALK1	265	_SSISSTVSS[Phospho (STY)]SSSSK_.2									0									0			0									0					23302.6			23302.6	1			-1
P43633	ALK1	267	_SSISSTVSSSS[Phospho (STY)]SSK_.2	16064.7	11187.7						13626.2	2	19761.4		9604.93		9305.53		14222.5	13223.6	4	1.03044	0.976345	-2	16982.9	8804.62				8212.65	10244.4	11061.1	4	16594.3		10603.5			11639.4		12945.7	3	0.854421	0.793336	1
P43633	ALK1	291	_NQTPALLQPDHHS[Phospho (STY)]LK_.3		4441.35	638.567	848.782	1228.47	4282.99	4946.18	2731.06	6	7341.98	1219.09	3639.68	4261.78	3581.77	1860.59	5006.31	3844.46	7	0.710388	0.695218	-1	4291.94	1260.09	2935.36			2795.73	6438.48	3544.32	5	15168.1	251.798		1064.53	13574.4	2948.91	8831.97	6973.29	6	0.508271	0.603958	-1
P43633	ALK1	303	_DS[Phospho (STY)]MTPVEPR_.2	157451	114960	139965	134928	122883	118349	130552	131298	7	71324.1	77963.8	64163.5	74366.3	55626.8	73548.1	62560.6	68507.6	7	1.91655	3.52935e-05	0	118936	128445	144764	125001	123340	118375	105048	123416	7	127149	163912	140060	135336	109970	136084	127417	134275	7	0.919124	0.486851	0
P43633	ALK1	303	_DS[Phospho (STY)]M[Oxidation (M)]TPVEPR_.2	12259.7	19849.5	20870	27482.8	22313.7	18390.5	20136.8	20186.2	7		10062.7	4477.27	10577.9	7696.08	10730.1	14117.4	9610.25	6	2.10048	0.0111423	1		14561.5	16278.2	11336	12836.3	16178.7	12694.6	13980.9	6	8272.53	17591.8	17300.5	19495.1	13941.1	22070.2		16445.2	6	0.850151	0.593138	0
P43633	ALK1	303	_RDS[Phospho (STY)]M[Oxidation (M)]TPVEPR_.2	10239.2	3511.97	5679.46	9331.22	3155.32		10185.2	7017.07	6	14038.4		8073.39	11982	8651.04		13722.8	11293.5	5	0.621335	0.256183	1	9323.74	5699.08		3803.31	6857.3	7369.27		6610.54	5	20040.9	10943.1	13064.5	13773.4	15179.7	19982.5	20213.9	16171.1	7	0.408786	0.00764441	-2
P43633	ALK1	303	_RDS[Phospho (STY)]MT[Phospho (STY)]PVEPR_.2	816.11	790.747	1553.69	2568.49	1839.4	210.003	2449.6	1461.15	7	1497.75	5751.54	2218.46	769.015	1364.78	4884.09	1797.53	2611.88	7	0.559423	0.520203	0	2224.86	2478.16	2129.38	2327.26	3562.33	2174.46	552.747	2207.03	7	1141.57	11881.3	8324.54	11161.5	5591.35	6220.04	1668.8	6569.88	7	0.335931	0.123152	0
P43633	ALK1	303	_RDS[Phospho (STY)]MTPVEPR_.2	92593.3	60154.9	37008.1	44069.5	44011.1	57482.9	63981.9	57043.1	7	135857	58398.4	61091.9	78521.7	65255.8	51933.7	62456.8	73359.3	7	0.777585	0.588267	0	110145	46097.6	61034.7	31271.6	44776.6	49944.8	48119.2	55912.8	7	194288	67368.1	120619	77976.6	83017.6	96834.6	146631	112391	7	0.497486	0.0946456	0
P43633	ALK1	303	_RDS[Phospho (STY)]MTPVEPR_.3	12512.2	1525.01					1720.54	5252.57	3	14482.1						568.891	7525.49	2	0.697971	0.919975	1	8300.68	600.342	2137.1					3679.37	3	21202.2	1528.41						11365.3	2	0.323737	0.706083	1
P43633	ALK1	305	_DSMT[Phospho (STY)]PVEPR_.2	9926.85	10451.4	14907.9	12208	12965	11729.7	10016.4	11743.6	7	18774.4	24279	22364.8	20559.3	18233.3	19757.4	20784.6	20679	7	0.567901	0.00012287	0	16039.6	14400.7	12593.4	16427.6	12334.3	11855.1	13072.6	13817.6	7	40173.3	42277.6	30555.2	43223.1	30621.2	28082.6	28232.2	34737.9	7	0.397768	0.000160987	0
P43633	ALK1	305	_RDS[Phospho (STY)]MT[Phospho (STY)]PVEPR_.2	816.11	790.747	1553.69	2568.49	1839.4	210.003	2449.6	1461.15	7	1497.75	5751.54	2218.46	769.015	1364.78	4884.09	1797.53	2611.88	7	0.559423	0.520203	0	2224.86	2478.16	2129.38	2327.26	3562.33	2174.46	552.747	2207.03	7	1141.57	11881.3	8324.54	11161.5	5591.35	6220.04	1668.8	6569.88	7	0.335931	0.123152	0
P43633	ALK1	305	_DSM[Oxidation (M)]T[Phospho (STY)]PVEPR_.2			980.559				574.87	777.715	2			1873.65				2849.49	2361.57	2	0.329321	0.378885	0	1178.79				776.182			977.484	2	2775.21	4594.36	2359.93	4787.03	4766.76	3560.83	3293.96	3734.01	7	0.261778	0.061222	-5
P43633	ALK1	318	_TS[Phospho (STY)]FSDFHK_.2	118243	320895	168773	204610	217669	266914	270441	223935	7	358701	219905	334953	349792	287500	321290	384892	322433	7	0.694516	0.0991417	0	227056	211091	271758	128009	181080	209121	271758	214268	7	286464	180124	337853	291896	135217	348530	391649	281676	7	0.760688	0.380032	0
P43633	ALK1	351	_AS[Phospho (STY)]SSS[Phospho (STY)]LSLNVLK_.2	75432.4	65764.7	78184.9	83566.9	66121.5	58274.3	60633.3	69711.2	7	78273	86614.5	76036.6	77422.9	62667.3	81119.9	93586.2	79388.6	7	0.8781	0.349057	0	54835.8	64265.8	70921.7	67163.5	62471.8	59083.9	53573.3	61759.4	7	57828.5	137679	111461	115797	104010	115984	99859.2	106088	7	0.582151	0.00807538	0
P43633	ALK1	351	_NKAS[Phospho (STY)]SSS[Phospho (STY)]LSLNVLK_.2	33446.2	45481.7	28998.2	32458.3	36440	32614.8	33779.2	34745.5	7	49489.2	26293.3	36065.2	32056.5	34577.9	27977.2	36717.5	34739.5	7	1.00017	0.999701	0	29770.7	29524.5	34585.7	22639.3	21986.2	23164.5	33371.8	27863.3	7	86424.6	28562.5	34089.1	33092.5	56023.7	41888.1	62808	48984.1	7	0.568823	0.133975	0
P43633	ALK1	351	_NKAS[Phospho (STY)]SSS[Phospho (STY)]LS[Phospho (STY)]LNVLK_.2	17912.2	16199.2	16100.2	17568.7				16945.1	4	17377.2	10477				11780.1	11257.1	12722.8	4	1.33186	0.236409	0	15101.8	13811.9	14365.2			13333.3	12142.9	13751	5	22804.5	21356.8	22142.8	15166.2	19209.1	20564.8	21966.1	20458.6	7	0.672138	0.00515018	-2
P43633	ALK1	351	_AS[Phospho (STY)]SSSLSLNVLK_.2	6538.11				7454.24		5499.84	6497.4	3		12492.2		10380.1		10973.3		11281.8	3	0.575916	0.0525485	0	8923.37			5976.03		7429.62	7474.12	7450.78	4	8066.87	18343.3	17398.4	17526.8	14590.8	13166.3	14775	14838.2	7	0.502134	0.0322129	-3
P43633	ALK1	352	_ASS[Phospho (STY)]SSLS[Phospho (STY)]LNVLK_.2							1853.29	1853.29	1									0			1									0									0			0
P43633	ALK1	353	_ASSS[Phospho (STY)]SLS[Phospho (STY)]LNVLK_.2	1288.2							1288.2	1	5897.24	5035.59			4650.07		5315.66	5224.64	4	0.246562	0.0680195	-3									0	4758.6			4727.69	3999.08	4290.69	5114.62	4578.14	5			-5
P43633	ALK1	354	_AS[Phospho (STY)]SSS[Phospho (STY)]LSLNVLK_.2	75432.4	65764.7	78184.9	83566.9	66121.5	58274.3	60633.3	69711.2	7	78273	86614.5	76036.6	77422.9	62667.3	81119.9	93586.2	79388.6	7	0.8781	0.349057	0	54835.8	64265.8	70921.7	67163.5	62471.8	59083.9	53573.3	61759.4	7	57828.5	137679	111461	115797	104010	115984	99859.2	106088	7	0.582151	0.00807538	0
P43633	ALK1	354	_NKAS[Phospho (STY)]SSS[Phospho (STY)]LSLNVLK_.2	33446.2	45481.7	28998.2	32458.3	36440	32614.8	33779.2	34745.5	7	49489.2	26293.3	36065.2	32056.5	34577.9	27977.2	36717.5	34739.5	7	1.00017	0.999701	0	29770.7	29524.5	34585.7	22639.3	21986.2	23164.5	33371.8	27863.3	7	86424.6	28562.5	34089.1	33092.5	56023.7	41888.1	62808	48984.1	7	0.568823	0.133975	0
P43633	ALK1	354	_NKAS[Phospho (STY)]SSS[Phospho (STY)]LS[Phospho (STY)]LNVLK_.2	17912.2	16199.2	16100.2	17568.7				16945.1	4	17377.2	10477				11780.1	11257.1	12722.8	4	1.33186	0.236409	0	15101.8	13811.9	14365.2			13333.3	12142.9	13751	5	22804.5	21356.8	22142.8	15166.2	19209.1	20564.8	21966.1	20458.6	7	0.672138	0.00515018	-2
P43633	ALK1	354	_ASSSS[Phospho (STY)]LSLNVLK_.2	6205.15	6639.32	8197.42	7238.62	8756.2	6592.31	6634.29	7180.47	7	9700.21	10380.3	9787.63	9170.29	10116.7	9396.74	11018.3	9938.61	7	0.722483	0.00117822	0	8354.2	8057.66	6908.57	6934.45	7935.23	8505.46	9004.31	7957.13	7	13545.9	18197.7	15864.1	13303.6	12883.7	13202.8	13254.9	14321.8	7	0.555596	0.00015017	0
P43633	ALK1	354	_ASSSS[Phospho (STY)]LS[Phospho (STY)]LNVLK_.2	3563.09	2346.7						2954.9	2				2555.02			3473.98	3014.5	2	0.980227	0.983074	0	3984.67		3065.66			2914.8	1736.49	2925.41	4		4794.2			3588.44	4174.74	3900.89	4114.57	4	0.710988	0.269745	0
P43633	ALK1	356	_NKAS[Phospho (STY)]SSS[Phospho (STY)]LS[Phospho (STY)]LNVLK_.2	17912.2	16199.2	16100.2	17568.7				16945.1	4	17377.2	10477				11780.1	11257.1	12722.8	4	1.33186	0.236409	0	15101.8	13811.9	14365.2			13333.3	12142.9	13751	5	22804.5	21356.8	22142.8	15166.2	19209.1	20564.8	21966.1	20458.6	7	0.672138	0.00515018	-2
P43633	ALK1	356	_ASSSS[Phospho (STY)]LS[Phospho (STY)]LNVLK_.2	3563.09	2346.7						2954.9	2				2555.02			3473.98	3014.5	2	0.980227	0.983074	0	3984.67		3065.66			2914.8	1736.49	2925.41	4		4794.2			3588.44	4174.74	3900.89	4114.57	4	0.710988	0.269745	0
P43633	ALK1	356	_ASSS[Phospho (STY)]SLS[Phospho (STY)]LNVLK_.2	1288.2							1288.2	1	5897.24	5035.59			4650.07		5315.66	5224.64	4	0.246562	0.0680195	-3									0	4758.6			4727.69	3999.08	4290.69	5114.62	4578.14	5			-5
P43633	ALK1	356	_ASS[Phospho (STY)]SSLS[Phospho (STY)]LNVLK_.2							1853.29	1853.29	1									0			1									0									0			0
P43633	ALK1	419	_IS[Phospho (STY)]LPVPDQVSR_.2	182357	183338	202701	237332	177964	188003	180497	193170	7	281229	371488	327364	363870	276982	337235	325616	326255	7	0.592084	0.000150464	0	135201	178510	206556	187416	180902	175735	164719	175577	7	284386	543063	490663	459307	412694	458004	386080	433457	7	0.405062	0.000146255	0
P43633	ALK1	419	_IS[Phospho (STY)]LPVPDQVS[Phospho (STY)]R_.2	3750.73	6161.24	8539.4	8678.86	6295.43	7209.25	7012.86	6806.82	7	4902.21	11856.4	10329.4	11525	8563.07	10254.6	10714.7	9735.07	7	0.699207	0.148844	0	922.861	5038.51	7598.41	5673.6	6467.18	6324.87	4293.54	5188.42	7	3020.81	14991.8	13084	11881.3	11761.3	11572.1	7312.16	10517.6	7	0.493307	0.0724793	0
P43633	ALK1	427	_ISLPVPDQVS[Phospho (STY)]R_.2	86101	92101.3	85230.1	111919	83747.2	73181.3	72643.1	86417.6	7	136250	60973.8	61346.8	55527.2	51804.2	58227.8	132731	79551.6	7	1.08631	0.872797	0	62676.4	60044.5	50449.1	74974.8	70917.6	55780.4	52319.2	61023.1	7	102526	112558	75252.1	72881.2	102469	103757	129286	99818.4	7	0.611341	0.0077866	0
P43633	ALK1	427	_IS[Phospho (STY)]LPVPDQVS[Phospho (STY)]R_.2	3750.73	6161.24	8539.4	8678.86	6295.43	7209.25	7012.86	6806.82	7	4902.21	11856.4	10329.4	11525	8563.07	10254.6	10714.7	9735.07	7	0.699207	0.148844	0	922.861	5038.51	7598.41	5673.6	6467.18	6324.87	4293.54	5188.42	7	3020.81	14991.8	13084	11881.3	11761.3	11572.1	7312.16	10517.6	7	0.493307	0.0724793	0
P43633	ALK1	440	_YSTS[Phospho (STY)]LLS[Phospho (STY)]LNSK_.2	56391.9	45294.9	54213.1	58218.1	50526.5	44208	47896.8	50964.2	7	78085.9	79919.8	72917.4	79269.7	63755.1	80382.4	84380.5	76958.7	7	0.662227	0.000232675	0	42430.6	49689.6	45631.7	48320.9	46149.1	42533.3	40291.6	45006.7	7	95589.1	122448	109086	106061	98869.2	112973	96401.6	105918	7	0.424919	3.93651e-07	0
P43633	ALK1	440	_YSTS[Phospho (STY)]LLSLNSK_.2									0	9334.88							9334.88	1			-1									0	14858.4	12787.9						13823.1	2			-2
P43633	ALK1	440	_YSTS[Phospho (STY)]LLS[Phospho (STY)]LNS[Phospho (STY)]K_.2	14231.5		9805.52					12018.5	2	13533.4				2560.07			8046.72	2	1.49359	0.831516	0			6039.74		7227.66			6633.7	2	11569.8	16187.8	17424.6	11409.5	13033.4	12634.8		13710	6	0.483859	0.0728517	-4
P43633	ALK1	443	_YSTS[Phospho (STY)]LLS[Phospho (STY)]LNSK_.2	56391.9	45294.9	54213.1	58218.1	50526.5	44208	47896.8	50964.2	7	78085.9	79919.8	72917.4	79269.7	63755.1	80382.4	84380.5	76958.7	7	0.662227	0.000232675	0	42430.6	49689.6	45631.7	48320.9	46149.1	42533.3	40291.6	45006.7	7	95589.1	122448	109086	106061	98869.2	112973	96401.6	105918	7	0.424919	3.93651e-07	0
P43633	ALK1	443	_YSTSLLS[Phospho (STY)]LNSK_.2	30774.9	22283.4	29037	22743.6	24431.5	21186.2	22024.4	24640.1	7	35143.3	46912.5	35117.6	41068.1	36871.3	39019.2	31515.5	37949.6	7	0.649285	0.00291485	0	35794.5	31150.2	24846.6	34989	22219.6	24812.5	29384.8	29028.2	7	46636.6	71354.9	68115.6	64829.9	48745.2	49653.6	46108.4	56492	7	0.513845	0.00146126	0
P43633	ALK1	443	_YSTSLLS[Phospho (STY)]LNS[Phospho (STY)]K_.2	10010.7	15360.4	19293.6	15909.5	14567.8	14686.6	15555.9	15054.9	7	7436.43	23134.6	21645.1	24459.8	17919.6	21747.8	16841.2	19026.4	7	0.791267	0.441724	0	14338.4	18381.7	19194.5	18987.4	17345.2	18247.4	16882.7	17625.3	7	9699.75	40416.3	36858.3	34548.8	29432.3	26058.3	13099.9	27159.1	7	0.648966	0.245884	0
P43633	ALK1	443	_YSTS[Phospho (STY)]LLS[Phospho (STY)]LNS[Phospho (STY)]K_.2	14231.5		9805.52					12018.5	2	13533.4				2560.07			8046.72	2	1.49359	0.831516	0			6039.74		7227.66			6633.7	2	11569.8	16187.8	17424.6	11409.5	13033.4	12634.8		13710	6	0.483859	0.0728517	-4
P43633	ALK1	446	_YSTSLLS[Phospho (STY)]LNS[Phospho (STY)]K_.2	10010.7	15360.4	19293.6	15909.5	14567.8	14686.6	15555.9	15054.9	7	7436.43	23134.6	21645.1	24459.8	17919.6	21747.8	16841.2	19026.4	7	0.791267	0.441724	0	14338.4	18381.7	19194.5	18987.4	17345.2	18247.4	16882.7	17625.3	7	9699.75	40416.3	36858.3	34548.8	29432.3	26058.3	13099.9	27159.1	7	0.648966	0.245884	0
P43633	ALK1	446	_YSTSLLSLNS[Phospho (STY)]K_.2	9108.1					8134.59	7855.43	8366.04	3		12836.3		14355.8	9821.02	10018.3	8323.22	11070.9	5	0.755677	0.427414	-2	12165.7		12018.9		9634.05	9190.44	9138.67	10429.6	5		18573					6034.26	12303.6	2	0.847683	0.83615	3
P43633	ALK1	446	_YSTS[Phospho (STY)]LLS[Phospho (STY)]LNS[Phospho (STY)]K_.2	14231.5		9805.52					12018.5	2	13533.4				2560.07			8046.72	2	1.49359	0.831516	0			6039.74		7227.66			6633.7	2	11569.8	16187.8	17424.6	11409.5	13033.4	12634.8		13710	6	0.483859	0.0728517	-4
P43633	ALK1	449	_SS[Phospho (STY)]LPMNK_.2	151062	78024.3	100391	99519.3	97662.5	101951	93339.2	103136	7	131286	145643	124066	132184	108289	123337	124482	127041	7	0.811831	0.182314	0	141755	93282.3	105863	120098	102830	92462.3	95081.6	107339	7	142410	229879	221643		169083	183187	137808	180668	6	0.594122	0.0118594	1
P43633	ALK1	449	_SS[Phospho (STY)]LPMNK_.1			4764.68				4671.09	4717.88	2	30564.9							30564.9	1	0.154356	0.0274912	1	19484.3	5446.99					5074.29	10001.8	3	28402.2				11186.8	10683.5		16757.5	3	0.596859	0.71787	0
P32789	ALK2	70	_GSAEDESQSFFTSSDS[Phospho (STY)]PTSK_.2									0									0			0									0			36377.9					36377.9	1			-1
P32789	ALK2	72	_GSAEDESQSFFTSSDSPT[Phospho (STY)]SK_.2	6480.81							6480.81	1									0			1									0									0			0
P32789	ALK2	231	_S[Phospho (STY)]VNDQDPNFVQPK_.2	40673.7	31967.3	35461	40869.9	33062.9	33924.7	30581.8	35220.2	7	45719.2	33538.4	32462.6	34993.3	29381.8	41453.4	40952.5	36928.7	7	0.953734	0.816211	0	27546.3	32862.8	37983.2	37043.9	36644.1	33688.8	29209.1	33568.3	7	32337	38364	35002.6	32393.5	34683.8	41539.8	39886.7	36315.3	7	0.924357	0.516262	0
P32789	ALK2	292	_HS[Phospho (STY)]SSNLS[Phospho (STY)]FR_.2									0							526.714	526.714	1			-1	4626.12							4626.12	1									0			1
P32789	ALK2	292	_HS[Phospho (STY)]SSNLSFR_.2		5320.01				1563.89	2831.79	3238.56	3	9172.73		3776.57					6474.65	2	0.500191	0.637264	1	12330.5		2688.53				5035.25	6684.75	3	11541.9				5823.96		6519.07	7961.65	3	0.839618	0.892911	0
P32789	ALK2	297	_HS[Phospho (STY)]SSNLS[Phospho (STY)]FR_.2									0							526.714	526.714	1			-1	4626.12							4626.12	1									0			1
P54783	ALO1	378	_TNTS[Phospho (STY)]PGPVYGNVC[Carbamidomethyl (C)]R_.2	19468.4	9223.61	9173.25	9010.78	9560.89	7688.43	7433.04	10222.6	7	14126.2	7110.86	5880.38	6305.8	6319.82	6387.44	8449.49	7797.14	7	1.31107	0.587846	0	4915.28	8374.49	7728.14	7118.45	6490.03	8474.7	8701.01	7400.3	7	13762.5	7666.13	9577.4	9327.5	3187.42	9700.92	7828.49	8721.48	7	0.848515	0.647379	0
P54783	ALO1	394	_PFLDNT[Phospho (STY)]PSHC[Carbamidomethyl (C)]R_.2							5235.82	5235.82	1									0			1									0						4587.92	7670.65	6129.28	2			-2
P54783	ALO1	396	_PFLDNTPS[Phospho (STY)]HC[Carbamidomethyl (C)]R_.2		10021.5	4405.69	7503.43		7864.95		7448.9	4	11380.8	4420.23			5429.17	5224.94	7208.34	6732.7	5	1.10638	0.888453	-1	7263.24	7054.91			5422.91	6281.84	9178.13	7040.21	5	13090		8593.05	7118.18	5934.96			8684.05	4	0.810706	0.640949	1
P54783	ALO1	525	_QWAIINGIIDPSELS[Phospho (STY)]D_.2									0		1536.27					1066.44	1301.35	2			-2						1300.79		1300.79	1	828.242				2041.28			1434.76	2	0.906626	0.970435	-1
Q08269	ALR1	17	_S[Phospho (STY)]NSLANT[Phospho (STY)]M[Oxidation (M)]VS[Phospho (STY)]MK_.2									0									0			0				3702.49				3702.49	1			5032.35					5032.35	1	0.735737		0
Q08269	ALR1	17	_S[Phospho (STY)]NSLANT[Phospho (STY)]MVSMK_.2		1377.93	3327.11		3309.71			2671.58	3		5702.55	2817.64	3350.33	3992.83	3546.17	1784.24	3532.29	6	0.756331	0.709654	-3				4375.34	4549.53		4945.67	4623.51	3		7211.75		7029.59	4381.69	2673.07		5324.02	4	0.868425	0.834938	-1
Q08269	ALR1	19	_SNS[Phospho (STY)]LANTMVSMK_.2	118915	42449	48481.1	45318.9	44511.3	41071.3	45141.2	55126.8	7	78132.9	47329.6	42138.1	42447.8	36196	41738	36129.2	46301.7	7	1.1906	0.782165	0	113221	61652.2	57253.9	57257.4	55391.9	52203	53224.3	64314.8	7	110660	74080.8	67493.2	69265.8	53497.6	55751.7	63747.8	70642.4	7	0.910428	0.813215	0
Q08269	ALR1	19	_SNS[Phospho (STY)]LANT[Phospho (STY)]MVS[Phospho (STY)]MKT[Phospho (STY)]EDHTGLYDHR_.3		39987.8	20744.3		28471.4	33348.1	34973.8	31505.1	5	24970.4	14035.6	27088	25035.8	24703.7	19294.5		22521.3	6	1.3989	0.218706	-1	16020.9	22457		24332.9		23963.7	28642.1	23083.3	5	26520	12329.4	13882.2	12734.3	29328.9	19794.6	23031.8	19660.2	7	1.17412	0.67212	-2
Q08269	ALR1	19	_SNS[Phospho (STY)]LANT[Phospho (STY)]MVS[Phospho (STY)]MKT[Phospho (STY)]EDHTGLYDHR_.4	2668.2	2466.77		2999.9			2690.11	2706.25	4									0			4	2618.68	2267.15		2408.74			4379.25	2918.45	4									0			4
Q08269	ALR1	19	_SNS[Phospho (STY)]LANT[Phospho (STY)]MVS[Phospho (STY)]MK_.2	34629.7	15683.3	21698.7	14412.1	16942.8	15834.5	14348.4	19078.5	7	41958.2	16659.8	14964.1	15253.9	11362.2	13957.7	8464.64	17517.2	7	1.08913	0.917325	0	27543.6	24996.2	19407	22689.7	19836.1	17285.8	13450.7	20744.1	7	32696.2	24414.9	21860.4	17076.3	14898.7	19131.6	20749.9	21546.9	7	0.962745	0.916918	0
Q08269	ALR1	19	_SNS[Phospho (STY)]LANT[Phospho (STY)]MVS[Phospho (STY)]M[Oxidation (M)]KT[Phospho (STY)]EDHTGLYDHR_.3						7659.36		7659.36	1									0			1									0									0			0
Q08269	ALR1	19	_SNS[Phospho (STY)]LANTMVS[Phospho (STY)]MK_.2	20973.5	7300.08	6599.58	7955.5	6739.01	6331.47	6444.81	8906.28	7	23769.4	5600.39	5311.84	5678.42	3976.86	6533.33	5658.08	8075.47	7	1.10288	0.935445	0	15741	8854.86	7110.32	8071.97	7741.69	7822.37	5811.06	8736.18	7	20342	9574.57	8485.88	7468.28	7024.84	6977.48	8867.41	9820.07	7	0.889625	0.841491	0
Q08269	ALR1	19	_SNS[Phospho (STY)]LANT[Phospho (STY)]M[Oxidation (M)]VS[Phospho (STY)]MKT[Phospho (STY)]EDHTGLYDHR_.3									0					8347.02		9020.91	8683.96	2			-2							10608.2	10608.2	1							5795.07	5795.07	1	1.83056		0
Q08269	ALR1	19	_SNS[Phospho (STY)]LANT[Phospho (STY)]M[Oxidation (M)]VS[Phospho (STY)]MK_.2	5613.22		5135.76			3423.74		4724.24	3				3992.66	3469.61	4723.75		4062.01	3	1.16303	0.756425	0									0	5980.21				4905.67		4857.97	5247.95	3			-3
Q08269	ALR1	19	_SNS[Phospho (STY)]LANT[Phospho (STY)]MVSMK_.2	7509.01							7509.01	1									0			1	14053.1							14053.1	1									0			1
Q08269	ALR1	23	_SNS[Phospho (STY)]LANT[Phospho (STY)]MVS[Phospho (STY)]MKT[Phospho (STY)]EDHTGLYDHR_.3		39987.8	20744.3		28471.4	33348.1	34973.8	31505.1	5	24970.4	14035.6	27088	25035.8	24703.7	19294.5		22521.3	6	1.3989	0.218706	-1	16020.9	22457		24332.9		23963.7	28642.1	23083.3	5	26520	12329.4	13882.2	12734.3	29328.9	19794.6	23031.8	19660.2	7	1.17412	0.67212	-2
Q08269	ALR1	23	_SNS[Phospho (STY)]LANT[Phospho (STY)]MVS[Phospho (STY)]MKT[Phospho (STY)]EDHTGLYDHR_.4	2668.2	2466.77		2999.9			2690.11	2706.25	4									0			4	2618.68	2267.15		2408.74			4379.25	2918.45	4									0			4
Q08269	ALR1	23	_SNS[Phospho (STY)]LANT[Phospho (STY)]MVS[Phospho (STY)]MK_.2	34629.7	15683.3	21698.7	14412.1	16942.8	15834.5	14348.4	19078.5	7	41958.2	16659.8	14964.1	15253.9	11362.2	13957.7	8464.64	17517.2	7	1.08913	0.917325	0	27543.6	24996.2	19407	22689.7	19836.1	17285.8	13450.7	20744.1	7	32696.2	24414.9	21860.4	17076.3	14898.7	19131.6	20749.9	21546.9	7	0.962745	0.916918	0
Q08269	ALR1	23	_SNS[Phospho (STY)]LANT[Phospho (STY)]MVS[Phospho (STY)]M[Oxidation (M)]KT[Phospho (STY)]EDHTGLYDHR_.3						7659.36		7659.36	1									0			1									0									0			0
Q08269	ALR1	23	_SNS[Phospho (STY)]LANT[Phospho (STY)]M[Oxidation (M)]VS[Phospho (STY)]MKT[Phospho (STY)]EDHTGLYDHR_.3									0					8347.02		9020.91	8683.96	2			-2							10608.2	10608.2	1							5795.07	5795.07	1	1.83056		0
Q08269	ALR1	23	_S[Phospho (STY)]NSLANT[Phospho (STY)]M[Oxidation (M)]VS[Phospho (STY)]MK_.2									0									0			0				3702.49				3702.49	1			5032.35					5032.35	1	0.735737		0
Q08269	ALR1	23	_SNS[Phospho (STY)]LANT[Phospho (STY)]M[Oxidation (M)]VS[Phospho (STY)]MK_.2	5613.22		5135.76			3423.74		4724.24	3				3992.66	3469.61	4723.75		4062.01	3	1.16303	0.756425	0									0	5980.21				4905.67		4857.97	5247.95	3			-3
Q08269	ALR1	23	_S[Phospho (STY)]NSLANT[Phospho (STY)]MVSMK_.2		1377.93	3327.11		3309.71			2671.58	3		5702.55	2817.64	3350.33	3992.83	3546.17	1784.24	3532.29	6	0.756331	0.709654	-3				4375.34	4549.53		4945.67	4623.51	3		7211.75		7029.59	4381.69	2673.07		5324.02	4	0.868425	0.834938	-1
Q08269	ALR1	23	_SNS[Phospho (STY)]LANT[Phospho (STY)]MVSMK_.2	7509.01							7509.01	1									0			1	14053.1							14053.1	1									0			1
Q08269	ALR1	23	_SNSLANT[Phospho (STY)]MVS[Phospho (STY)]MK_.2	3114.68		192.824		513.389			1273.63	3		2899.63	1178.13	1755.3	961.591	1242.83		1607.5	5	0.792308	0.889537	-2	10873.5	783.537	2154.89	1781.15	214.102	615.824	1296.7	2531.39	7	1058.17	4005.35	3954.08	1789.14	1024.76			2366.3	5	1.06977	0.974628	2
Q08269	ALR1	26	_SNS[Phospho (STY)]LANT[Phospho (STY)]MVS[Phospho (STY)]MKT[Phospho (STY)]EDHTGLYDHR_.3		39987.8	20744.3		28471.4	33348.1	34973.8	31505.1	5	24970.4	14035.6	27088	25035.8	24703.7	19294.5		22521.3	6	1.3989	0.218706	-1	16020.9	22457		24332.9		23963.7	28642.1	23083.3	5	26520	12329.4	13882.2	12734.3	29328.9	19794.6	23031.8	19660.2	7	1.17412	0.67212	-2
Q08269	ALR1	26	_SNS[Phospho (STY)]LANT[Phospho (STY)]MVS[Phospho (STY)]MKT[Phospho (STY)]EDHTGLYDHR_.4	2668.2	2466.77		2999.9			2690.11	2706.25	4									0			4	2618.68	2267.15		2408.74			4379.25	2918.45	4									0			4
Q08269	ALR1	26	_SNS[Phospho (STY)]LANT[Phospho (STY)]MVS[Phospho (STY)]MK_.2	34629.7	15683.3	21698.7	14412.1	16942.8	15834.5	14348.4	19078.5	7	41958.2	16659.8	14964.1	15253.9	11362.2	13957.7	8464.64	17517.2	7	1.08913	0.917325	0	27543.6	24996.2	19407	22689.7	19836.1	17285.8	13450.7	20744.1	7	32696.2	24414.9	21860.4	17076.3	14898.7	19131.6	20749.9	21546.9	7	0.962745	0.916918	0
Q08269	ALR1	26	_SNS[Phospho (STY)]LANT[Phospho (STY)]MVS[Phospho (STY)]M[Oxidation (M)]KT[Phospho (STY)]EDHTGLYDHR_.3						7659.36		7659.36	1									0			1									0									0			0
Q08269	ALR1	26	_SNS[Phospho (STY)]LANTMVS[Phospho (STY)]MK_.2	20973.5	7300.08	6599.58	7955.5	6739.01	6331.47	6444.81	8906.28	7	23769.4	5600.39	5311.84	5678.42	3976.86	6533.33	5658.08	8075.47	7	1.10288	0.935445	0	15741	8854.86	7110.32	8071.97	7741.69	7822.37	5811.06	8736.18	7	20342	9574.57	8485.88	7468.28	7024.84	6977.48	8867.41	9820.07	7	0.889625	0.841491	0
Q08269	ALR1	26	_SNS[Phospho (STY)]LANT[Phospho (STY)]M[Oxidation (M)]VS[Phospho (STY)]MKT[Phospho (STY)]EDHTGLYDHR_.3									0					8347.02		9020.91	8683.96	2			-2							10608.2	10608.2	1							5795.07	5795.07	1	1.83056		0
Q08269	ALR1	26	_S[Phospho (STY)]NSLANT[Phospho (STY)]M[Oxidation (M)]VS[Phospho (STY)]MK_.2									0									0			0				3702.49				3702.49	1			5032.35					5032.35	1	0.735737		0
Q08269	ALR1	26	_SNS[Phospho (STY)]LANT[Phospho (STY)]M[Oxidation (M)]VS[Phospho (STY)]MK_.2	5613.22		5135.76			3423.74		4724.24	3				3992.66	3469.61	4723.75		4062.01	3	1.16303	0.756425	0									0	5980.21				4905.67		4857.97	5247.95	3			-3
Q08269	ALR1	26	_SNSLANT[Phospho (STY)]MVS[Phospho (STY)]MK_.2	3114.68		192.824		513.389			1273.63	3		2899.63	1178.13	1755.3	961.591	1242.83		1607.5	5	0.792308	0.889537	-2	10873.5	783.537	2154.89	1781.15	214.102	615.824	1296.7	2531.39	7	1058.17	4005.35	3954.08	1789.14	1024.76			2366.3	5	1.06977	0.974628	2
Q08269	ALR1	26	_SNSLANTMVS[Phospho (STY)]MK_.2	2956.49	1546.61			1167.98	1280.12		1737.8	4									0			4	5653.09	1671.6		1066.27		11409.5	1505.61	4261.22	5	3650.12						16024.4	9837.27	2	0.433171	0.600859	3
Q08269	ALR1	29	_SNS[Phospho (STY)]LANT[Phospho (STY)]MVS[Phospho (STY)]MKT[Phospho (STY)]EDHTGLYDHR_.3		39987.8	20744.3		28471.4	33348.1	34973.8	31505.1	5	24970.4	14035.6	27088	25035.8	24703.7	19294.5		22521.3	6	1.3989	0.218706	-1	16020.9	22457		24332.9		23963.7	28642.1	23083.3	5	26520	12329.4	13882.2	12734.3	29328.9	19794.6	23031.8	19660.2	7	1.17412	0.67212	-2
Q08269	ALR1	29	_SNS[Phospho (STY)]LANT[Phospho (STY)]MVS[Phospho (STY)]MKT[Phospho (STY)]EDHTGLYDHR_.4	2668.2	2466.77		2999.9			2690.11	2706.25	4									0			4	2618.68	2267.15		2408.74			4379.25	2918.45	4									0			4
Q08269	ALR1	29	_SNS[Phospho (STY)]LANT[Phospho (STY)]MVS[Phospho (STY)]M[Oxidation (M)]KT[Phospho (STY)]EDHTGLYDHR_.3						7659.36		7659.36	1									0			1									0									0			0
Q08269	ALR1	29	_SNS[Phospho (STY)]LANT[Phospho (STY)]M[Oxidation (M)]VS[Phospho (STY)]MKT[Phospho (STY)]EDHTGLYDHR_.3									0					8347.02		9020.91	8683.96	2			-2							10608.2	10608.2	1							5795.07	5795.07	1	1.83056		0
Q08269	ALR1	79	_YNS[Phospho (STY)]HVDVGSVPSR_.2	20041.3	29799.9	16397.2	19653.9	20925	25750.9	19864	21776	7	38096	13768.2	19635.9	22473	20336.8	19964.7	18302.8	21796.8	7	0.999048	0.998822	0	44080.1	20468.3	21906.8	14630.9	17120.3	19407.3	26567.1	23454.4	7	48858.6	16891.7	34054.1	19785.8	45125	29398.3	28153.4	31752.4	7	0.738666	0.486282	0
Q08269	ALR1	79	_YNS[Phospho (STY)]HVDVGSVPSR_.3	6802.8	13832.5	6291.65	7723.29	8632.99	9293.81	8433.47	8715.79	7	11928.5	6469.66		10601.2	8987.21	11075.1	8186.62	9541.39	6	0.913472	0.811703	1	12504.4	7628.49				8650.87	11162.3	9986.52	4	17420.2	6135.57	11617.5	6677.66	11382.8	7289.04	14834.7	10765.4	7	0.927653	0.902657	-3
Q08269	ALR1	85	_YNSHVDVGS[Phospho (STY)]VPS[Phospho (STY)]R_.2	16701.7	30421	14134.3	19542.8	19764.8	24955.2	20533	20864.7	7	31585.6	11604.3	16949.8	17135.4	16901.2	17370.8	18536.1	18583.3	7	1.12276	0.781251	0	19220.5	12212.4	18295.6	10679.9	12335	12224	19645.9	14944.8	7	22650.9	7299.66	7682.89	8516.18	20871.5	11685.8	17802.4	13787	7	1.08397	0.87658	0
Q08269	ALR1	85	_YNSHVDVGS[Phospho (STY)]VPS[Phospho (STY)]R_.3			4964.36	5008.82	6132.56	5639.51	7929.07	5934.86	5	11020.3	2210.69		5111	7603.57	3870.85	6237.44	6008.98	6	0.987665	0.988596	-1	7304.82	5175.11	5536.92	3857.97	2559.13	3716.8	4315.95	4638.1	7	9155.41			3195.88	5020.34		8930.45	6575.52	4	0.705358	0.478785	3
Q08269	ALR1	85	_YNSHVDVGS[Phospho (STY)]VPSR_.3		9252.26			3643.89	7555.13		6817.09	3	7550.61		6144.27	5213.02	5459.84		5954.6	6064.47	5	1.1241	0.84189	-2	6249.19					3596.39	8076.39	5973.99	3	8263.43				10809.6			9536.53	2	0.626433	0.454542	1
Q08269	ALR1	85	_YNSHVDVGS[Phospho (STY)]VPSR_.2		2935.98						2935.98	1									0			1			3515.98				4770.1	4143.04	2	6379.57				6522.15		3876.42	5592.71	3	0.740793	0.632418	-1
Q08269	ALR1	88	_YNSHVDVGS[Phospho (STY)]VPS[Phospho (STY)]R_.2	16701.7	30421	14134.3	19542.8	19764.8	24955.2	20533	20864.7	7	31585.6	11604.3	16949.8	17135.4	16901.2	17370.8	18536.1	18583.3	7	1.12276	0.781251	0	19220.5	12212.4	18295.6	10679.9	12335	12224	19645.9	14944.8	7	22650.9	7299.66	7682.89	8516.18	20871.5	11685.8	17802.4	13787	7	1.08397	0.87658	0
Q08269	ALR1	88	_YNSHVDVGS[Phospho (STY)]VPS[Phospho (STY)]R_.3			4964.36	5008.82	6132.56	5639.51	7929.07	5934.86	5	11020.3	2210.69		5111	7603.57	3870.85	6237.44	6008.98	6	0.987665	0.988596	-1	7304.82	5175.11	5536.92	3857.97	2559.13	3716.8	4315.95	4638.1	7	9155.41			3195.88	5020.34		8930.45	6575.52	4	0.705358	0.478785	3
Q08269	ALR1	143	_QLYVESNIHT[Phospho (STY)]PPK_.3		8451.98			3651.77	5353.2	6869.25	6081.55	4		6269.92	9345.6	7280.21	10167.5		8695.48	8351.73	5	0.728178	0.3914	-1			5952.16	2367.54	3817.12	4679.94	7882.58	4939.87	5	10454.3	5062.61	9892.63	10588.9	22844.9	11032.1	20194.9	12867.2	7	0.383912	0.13517	-2
Q08269	ALR1	160	_DYTMSSST[Phospho (STY)]ASSGNK_.2									0							4728.36	4728.36	1			-1									0									0			0
Q08269	ALR1	162	_DYTMSSSTAS[Phospho (STY)]SGNK_.2	23037.1							23037.1	1									0			1	18003.1						4023.14	11013.1	2									0			2
Q08269	ALR1	172	_LSAS[Phospho (STY)]SSAS[Phospho (STY)]PITK_.2	44801.2	32704.9	35664.8	38813.8	37288.4	30542.7	28039.9	35407.9	7	55011.9	40017.9	35367.2	36860.3	27999.4	40043.3	48493.3	40541.9	7	0.873367	0.575803	0	41866.3	35053.3	34220.2	44885.1	35157	35824.9	33089.7	37156.6	7	62976.7	70527.3	59084.7	68670.4	58294.8	63029.3	68413.4	64428.1	7	0.576715	8.60987e-06	0
Q08269	ALR1	172	_LSAS[Phospho (STY)]SSASPITK_.2	6711.75	3614.1	4806.66	3542.91	4380.87	4573.87	3706.14	4476.61	7	5303.43	6386.52	4089.47	4821.15	4752.12	4542.57	5085.32	4997.23	7	0.89582	0.672962	0	11360.5	4841.62	4639.85	5831.29	4570.96	5255.48		6083.29	6	7671.03	9239.47	6798.56	7437.88	6930.52	6941.19	6879.48	7414.02	7	0.820512	0.547394	-1
Q08269	ALR1	173	_LSASS[Phospho (STY)]S[Phospho (STY)]ASPITK_.2							3317.15	3317.15	1							4831.94	4831.94	1	0.686506		0		2999.32					3278.94	3139.13	2					4785.35			4785.35	1	0.655988	0.331084	1
Q08269	ALR1	174	_LSASSS[Phospho (STY)]ASPITK_.2	23329.3	17170.7	15714.6	19787.1	14844.9	17430.9	14918.4	17599.4	7	19259.1	12862.3	10442.4	11690.6	10685.4	12351.4	18099.5	13627.3	7	1.29149	0.246066	0	26492.2	16615.3	17966.3	20332.9	18453.6	17186.8	14833.4	18840.1	7	19393.1	20319.3	19468.6	17083.7	15350	20873.6	22899.3	19341.1	7	0.974095	0.913937	0
Q08269	ALR1	174	_LSASS[Phospho (STY)]S[Phospho (STY)]ASPITK_.2							3317.15	3317.15	1							4831.94	4831.94	1	0.686506		0		2999.32					3278.94	3139.13	2					4785.35			4785.35	1	0.655988	0.331084	1
Q08269	ALR1	174	_LSASSS[Phospho (STY)]AS[Phospho (STY)]PITK_.2	3530.55							3530.55	1	4399.16							4399.16	1	0.802551		0				15319.2		12169.7		13744.5	2	6185.64	15837.3	7066.84	13089.5				10544.8	4	1.30344	0.725065	-2
Q08269	ALR1	176	_LSAS[Phospho (STY)]SSAS[Phospho (STY)]PITK_.2	44801.2	32704.9	35664.8	38813.8	37288.4	30542.7	28039.9	35407.9	7	55011.9	40017.9	35367.2	36860.3	27999.4	40043.3	48493.3	40541.9	7	0.873367	0.575803	0	41866.3	35053.3	34220.2	44885.1	35157	35824.9	33089.7	37156.6	7	62976.7	70527.3	59084.7	68670.4	58294.8	63029.3	68413.4	64428.1	7	0.576715	8.60987e-06	0
Q08269	ALR1	176	_LSASSS[Phospho (STY)]AS[Phospho (STY)]PITK_.2	3530.55							3530.55	1	4399.16							4399.16	1	0.802551		0				15319.2		12169.7		13744.5	2	6185.64	15837.3	7066.84	13089.5				10544.8	4	1.30344	0.725065	-2
Q08269	ALR1	176	_LSASSSAS[Phospho (STY)]PITK_.2	96111.7	67526.4	67837	73038.5	62820.6	56825.8	59871.5	69147.3	7	112226	58774.2	52880.2	54521.6	47162.8	54665.5	93174.9	67629.3	7	1.02245	0.964465	0	105779	68887.1	69173.2	82010	73806.1	70037.8	68712.2	76915.1	7	129139	125938	114304	115230	103987	136768	137141	123215	7	0.624233	0.000608976	0
Q08269	ALR1	184	_S[Phospho (STY)]SLVSPVLEIPHESK_.3		211699						211699	1		117503						117503	1	1.80165		0									0									0			0
Q08269	ALR1	185	_SS[Phospho (STY)]LVSPVLEIPHESK_.2			126958					126958	1							149034	149034	1	0.851874		0		165934	236007	119289	164666	173881		171955	5			146881				119591	133236	2	1.2906	0.598537	3
Q08269	ALR1	185	_KSS[Phospho (STY)]LVS[Phospho (STY)]PVLEIPHESK_.3				1552.38			10455.2	6003.79	2	5333.64						6627.76	5980.7	2	1.00386	0.999151	0			7763		1128.43	3159.04	13704.1	6438.64	4		796.275	2604.79	1453.23	21752	2544.34	19055	8034.27	6	0.801397	0.914154	-2
Q08269	ALR1	185	_KSS[Phospho (STY)]LVSPVLEIPHESK_.3									0			21353					21353	1			-1	14884.7		13736.7				44481.1	24367.5	3	19809.4				124148		39774.5	61243.8	3	0.397877	0.65037	0
Q08269	ALR1	188	_KSS[Phospho (STY)]LVS[Phospho (STY)]PVLEIPHESK_.3				1552.38			10455.2	6003.79	2	5333.64						6627.76	5980.7	2	1.00386	0.999151	0			7763		1128.43	3159.04	13704.1	6438.64	4		796.275	2604.79	1453.23	21752	2544.34	19055	8034.27	6	0.801397	0.914154	-2
Q08269	ALR1	188	_SSLVS[Phospho (STY)]PVLEIPHESK_.2			1220.9					1220.9	1	5682.72				2421.62		2971.29	3691.88	3	0.330698	0.695239	-2	6649.22						6173.3	6411.26	2	9137.96				8998.62			9068.29	2	0.706998	0.067262	0
Q08269	ALR1	188	_SSLVS[Phospho (STY)]PVLEIPHESK_.3							2767.22	2767.22	1		1963.3	2886.28		2646.37		2873.84	2592.45	4	1.06742	0.910615	-3	3215.75	2078.99	2610		1711.29		4869.28	2897.06	5	4927.29		2807.1	2673.33	7175.19	3340.21	5561.26	4414.07	6	0.656325	0.42669	-1
Q08269	ALR1	214	_TYS[Phospho (STY)]TTSAHSSINPAVLLTK_.3	3356.16							3356.16	1									0			1	10683.6							10683.6	1	15212.4						7528.98	11370.7	2	0.939576	0.977412	-1
Q08269	ALR1	214	_TYS[Phospho (STY)]TTSAHSSINPAVLLTK_.2									0									0			0	10060.3							10060.3	1	8811.44						3300.94	6056.19	2	1.66116	0.803367	-1
Q08269	ALR1	217	_TYSTTS[Phospho (STY)]AHS[Phospho (STY)]S[Phospho (STY)]INPAVLLTK_.3	30314.2		57659			41699.6	39300.9	42243.4	4			52111.5		42716.6		16009.9	36946	3	1.14338	0.873103	1	53410.9	9352.44		60746.1	34579		29356.3	37488.9	5	19253.2				51726.3			35489.7	2	1.05633	0.968072	3
Q08269	ALR1	220	_TYSTTS[Phospho (STY)]AHS[Phospho (STY)]S[Phospho (STY)]INPAVLLTK_.3	30314.2		57659			41699.6	39300.9	42243.4	4			52111.5		42716.6		16009.9	36946	3	1.14338	0.873103	1	53410.9	9352.44		60746.1	34579		29356.3	37488.9	5	19253.2				51726.3			35489.7	2	1.05633	0.968072	3
Q08269	ALR1	220	_TYSTTSAHS[Phospho (STY)]S[Phospho (STY)]INPAVLLTK_.3	13597.7	15938.4		11563.7	13875.1		15280.6	14051.1	5	18230.6	12318.1		13408.4			16382.1	15084.8	4	0.931472	0.797354	1	22720.7	14933.9	14698.8	12235	11805.5	11057.3	15715.3	14738.1	7	11521.7		11115.3	9649.19	10890.6		11889.6	11013.3	5	1.33821	0.274148	2
Q08269	ALR1	221	_TYSTTS[Phospho (STY)]AHS[Phospho (STY)]S[Phospho (STY)]INPAVLLTK_.3	30314.2		57659			41699.6	39300.9	42243.4	4			52111.5		42716.6		16009.9	36946	3	1.14338	0.873103	1	53410.9	9352.44		60746.1	34579		29356.3	37488.9	5	19253.2				51726.3			35489.7	2	1.05633	0.968072	3
Q08269	ALR1	221	_TYSTTSAHS[Phospho (STY)]S[Phospho (STY)]INPAVLLTK_.3	13597.7	15938.4		11563.7	13875.1		15280.6	14051.1	5	18230.6	12318.1		13408.4			16382.1	15084.8	4	0.931472	0.797354	1	22720.7	14933.9	14698.8	12235	11805.5	11057.3	15715.3	14738.1	7	11521.7		11115.3	9649.19	10890.6		11889.6	11013.3	5	1.33821	0.274148	2
Q08269	ALR1	233	_STS[Phospho (STY)]QKS[Phospho (STY)]DADDDTLER_.2	1786.63	2985.61		4558.67	2923.24	3124.45	14179.9	4926.42	6	5501.12	8405.06	13065.2	7097.31	5463.03	5600.5	7575.04	7529.6	7	0.654273	0.588859	-1	2369.19	1693	926.023	5050.27	3910.17	1329.01	1480.82	2394.07	7	1412.99		4402.14	5985.33	8764.16	2735.1	3784.39	4514.02	6	0.530363	0.333251	1
Q08269	ALR1	236	_STS[Phospho (STY)]QKS[Phospho (STY)]DADDDTLER_.2	1786.63	2985.61		4558.67	2923.24	3124.45	14179.9	4926.42	6	5501.12	8405.06	13065.2	7097.31	5463.03	5600.5	7575.04	7529.6	7	0.654273	0.588859	-1	2369.19	1693	926.023	5050.27	3910.17	1329.01	1480.82	2394.07	7	1412.99		4402.14	5985.33	8764.16	2735.1	3784.39	4514.02	6	0.530363	0.333251	1
Q08269	ALR1	255	_AS[Phospho (STY)]FDSDVSQASR_.2	41090.8	34079.6	39195.9	39983	33040.4	30741.1	30431.2	35508.8	7	33259.7	30441.6	27936.9	27204.1	24176.6	33368	38583.3	30710	7	1.15626	0.338774	0	33258.9	31252.4	28808.4	28058.6	29298.1	29500.8	27361.6	29648.4	7	24875.6	27609.9	24554.7	26820.8	21000.7	23697.6	27210.3	25110	7	1.18074	0.0232526	0
Q08269	ALR1	306	_S[Phospho (STY)]QFLASLQVPNEQK_.2									0							6014	6014	1			-1									0									0			0
Q08269	ALR1	311	_SQFLAS[Phospho (STY)]LQVPNEQK_.2	86579.3	86865.6	79568.1	89289.8	74597.9	82647.7	80823.7	82910.3	7	97421.3	100015	82068.5	87102.9	76266.9	80771	99309.3	88993.6	7	0.931643	0.51483	0	88530.4	83142.5	102949	87114.9	90487.5	83701.2	81519.2	88206.4	7	105543	112969	109661	102493	104910	117140	116952	109953	7	0.802221	0.00108435	0
Q08269	ALR1	357	_SES[Phospho (STY)]TNETEIHEK_.2	15794.8	21113.7	27665	84021.3	45184.7	33947.6	146657	53483.5	7	53413.6	126189	114082	84128.1	49725.2	118566	71142.5	88178	7	0.60654	0.45062	0	25963.8	31233.6	18044.6	35221.5	86190.5	39739	22810.9	37029.1	7	14485.5	19599.4	57606.9	80259.5	72149.4	33363.4	14351.3	41687.9	7	0.888246	0.897228	0
Q08269	ALR1	357	_SES[Phospho (STY)]TNETEIHEK_.3					2057.99		5322.36	3690.18	2		5461.53	6644.08	2769.28	2352.1	4673.79	5277.83	4529.77	6	0.81465	0.839062	-4		1601.9			3836.18			2719.04	2				5851.56				5851.56	1	0.46467	0.665666	1
Q08269	ALR1	817	_S[Phospho (STY)]VISSFLPK_.2	37245.9	49399.4	47026.4	56182.7	41491.5	46271.6	42557.2	45739.2	7	35855	39472.6	41133.5	43523.4	34894.9	46446.7	48580.6	41415.2	7	1.10441	0.523571	0	27019.2	52064.7	61856.4	50946.5	56068.7	50017.1	41955.8	48561.2	7	49717.5	79799.2	77346.7	66933.2	70202.1	86313.4	73579.5	71984.5	7	0.674606	0.0259925	0
Q08269	ALR1	817	_S[Phospho (STY)]VIS[Phospho (STY)]SFLPK_.2		8724.89					12741.4	10733.1	2				9257.24				9257.24	1	1.15943	0.911388	1		8986.78						8986.78	1	12461.5		23097.7		24268.3	34241.2	28397	24493.1	5	0.36691	0.438423	-4
Q08269	ALR1	817	_S[Phospho (STY)]VISS[Phospho (STY)]FLPK_.2	3011.38		1408.14	3310.9			2620.98	2587.85	4	1455.98	1562.41					2001.61	1673.33	3	1.54653	0.458369	1			8415.83				2616.9	5516.36	2		10585				11613.3	11366.4	11188.2	3	0.493051	0.308305	-1
Q08269	ALR1	820	_SVIS[Phospho (STY)]SFLPK_.2		21155.3			18881.6	26940.5	26300.6	23319.5	4		34283.2	32366.6	41991.3	32667			35327	4	0.660103	0.0701234	0	24076.1	35878.2	51926.8	38950.1	45349.1	42562.7	37820.6	39509.1	7	31204.4	88352.2	89958.2	67679.7	68063.8	74403	69654.3	69902.2	7	0.565205	0.0274827	0
Q08269	ALR1	820	_SVIS[Phospho (STY)]S[Phospho (STY)]FLPK_.2			15934.6			19818.1	24323.9	20025.5	3		22050.3	24786.2	43470.8	29730	33540.5		30715.6	5	0.651967	0.369957	-2	17597.6	28287	56462.7	43339.9	39376.7	39359.5	31004.2	36489.7	7	21780.7	84753.4	107375	66979.7	80364.4	63149.8	50232.8	67805	7	0.538156	0.109437	0
Q08269	ALR1	820	_S[Phospho (STY)]VIS[Phospho (STY)]SFLPK_.2		8724.89					12741.4	10733.1	2				9257.24				9257.24	1	1.15943	0.911388	1		8986.78						8986.78	1	12461.5		23097.7		24268.3	34241.2	28397	24493.1	5	0.36691	0.438423	-4
Q08269	ALR1	821	_SVISS[Phospho (STY)]FLPK_.2	43605.5	64921.5	47431.5	71277.7	44668.8	62068.6	64351.9	56903.6	7	31598	60384.9	61336.4	68335.8	57471.8	69343.7	60151.1	58374.5	7	0.974803	0.941902	0	53106.1	84342	110783	103890	110717	95535	89767.6	92591.6	7	75115.6	129271	107496	113101	133086	114999	114836	112558	7	0.822614	0.30399	0
Q08269	ALR1	821	_SVIS[Phospho (STY)]S[Phospho (STY)]FLPK_.2			15934.6			19818.1	24323.9	20025.5	3		22050.3	24786.2	43470.8	29730	33540.5		30715.6	5	0.651967	0.369957	-2	17597.6	28287	56462.7	43339.9	39376.7	39359.5	31004.2	36489.7	7	21780.7	84753.4	107375	66979.7	80364.4	63149.8	50232.8	67805	7	0.538156	0.109437	0
Q08269	ALR1	821	_S[Phospho (STY)]VISS[Phospho (STY)]FLPK_.2	3011.38		1408.14	3310.9			2620.98	2587.85	4	1455.98	1562.41					2001.61	1673.33	3	1.54653	0.458369	1			8415.83				2616.9	5516.36	2		10585				11613.3	11366.4	11188.2	3	0.493051	0.308305	-1
Q08269	ALR1	847	_S[Phospho (STY)]VASLPSR_.2	27213.1	23488.1	29418.8	29188.2	28484.5	25175.7	23334.7	26614.7	7	24099.9	31749.3	26621.3	29158	23319.3	26398.4	31469	27545	7	0.966227	0.832738	0	30285.9	25993.9	26373.6	26285.9	25054.3	25802.4	27891.2	26812.5	7	16841.4	28350.1	34393.7	33180.1	26071.4	25223.2	27331.6	27341.6	7	0.980646	0.933293	0
Q08269	ALR1	847	_S[Phospho (STY)]VAS[Phospho (STY)]LPS[Phospho (STY)]R_.2		1028.47	6056.62	6629.36	5591.11	7931.81	7728.54	5827.65	6	1305.86	13962	4086.76	6577.63	5063.74	10584.5	6061.36	6805.99	7	0.856254	0.85881	-1	4661.1	10086.9	14338	13972.6	17630.2	14397.3	6325.91	11630.3	7	11902.7	24547.3	33397.5	20326.7	13117.8	22950.7	14228.7	20067.3	7	0.579562	0.16132	0
Q08269	ALR1	847	_S[Phospho (STY)]VAS[Phospho (STY)]LPSR_.2	74821.2	61606.7	58771.2	69278.2	61703.5	67979.4	57864.6	64575	7	62768.9	60780	61644.2	63647.5	45753.5	62041.3	69249.4	60840.7	7	1.06138	0.675527	0	40195.5	58099.3	65800.7	72303.3	70922.4	64748.3	55073.5	61020.4	7	63413.5	79806.8	83851.3	74717.7	70665	76501	95376.3	77761.7	7	0.784711	0.0873672	0
Q08269	ALR1	847	_S[Phospho (STY)]VAS[Phospho (STY)]LPSR_.1	7050.63		637.947			144.037		2610.87	3	8567.36	6154.24			127.322		7737.95	5646.72	4	0.46237	0.696262	-1	4493.82							4493.82	1	6627.6					6899.55	433.486	4653.55	3	0.965676	0.989637	-2
Q08269	ALR1	850	_SVAS[Phospho (STY)]LPSR_.2	452651	375051	364503	412646	322971	375145	365233	381172	7	339560	386338	334916	364437	303491	359730	411844	357188	7	1.06714	0.623469	0	553449	405309	477146	463377	468634	450301	444611	466118	7	478698	563808	557991	532308	436711	509748	605365	526375	7	0.885524	0.223043	0
Q08269	ALR1	850	_SVAS[Phospho (STY)]LPSR_.1	12077.6		1723.77	2654.65	1516.41		1949.4	3984.36	5	12449.3	2129.96	1243.41		1765.86		2134.03	3944.51	5	1.0101	0.997778	0	12966.4	2583.5	4104.14	2116.42	2636.97	2199.13	2170.2	4110.97	7	12251.9	2565.84	4160.97	2875.1		3060.5	3303.84	4703.03	6	0.874112	0.918706	1
Q08269	ALR1	850	_SVAS[Phospho (STY)]LPS[Phospho (STY)]R_.2	75815.1	48603.8	42563.2	55008.6	45391.7	55553.5	51826.9	53537.6	7	47141.8	74510.8	59037.6	75442.4	54307	68995.1	51721.3	61593.7	7	0.869205	0.554871	0	81089.4	70122.8	84646.2	85896.6	82274.8	88725.7	78896.2	81664.5	7	81163.7	126218	128151	120998	89626.6	88796.8	88828.1	103398	7	0.789811	0.123253	0
Q08269	ALR1	850	_SVAS[Phospho (STY)]LPS[Phospho (STY)]RYS[Phospho (STY)]R_.2				10523.5			8120.59	9322.06	2	7475.83	8720.41	9683.45	12599	8739.87	11828	7639.96	9526.64	7	0.978525	0.968905	-5	8450.07	11258.9	14649.6	11559.1	12919.5	15219.8		12342.8	6	15200.4	20390.7	22966.7	15438.9	17045.8	20286.1	16111.4	18205.7	7	0.677965	0.0303717	-1
Q08269	ALR1	850	_S[Phospho (STY)]VAS[Phospho (STY)]LPS[Phospho (STY)]R_.2		1028.47	6056.62	6629.36	5591.11	7931.81	7728.54	5827.65	6	1305.86	13962	4086.76	6577.63	5063.74	10584.5	6061.36	6805.99	7	0.856254	0.85881	-1	4661.1	10086.9	14338	13972.6	17630.2	14397.3	6325.91	11630.3	7	11902.7	24547.3	33397.5	20326.7	13117.8	22950.7	14228.7	20067.3	7	0.579562	0.16132	0
Q08269	ALR1	850	_S[Phospho (STY)]VAS[Phospho (STY)]LPSR_.2	74821.2	61606.7	58771.2	69278.2	61703.5	67979.4	57864.6	64575	7	62768.9	60780	61644.2	63647.5	45753.5	62041.3	69249.4	60840.7	7	1.06138	0.675527	0	40195.5	58099.3	65800.7	72303.3	70922.4	64748.3	55073.5	61020.4	7	63413.5	79806.8	83851.3	74717.7	70665	76501	95376.3	77761.7	7	0.784711	0.0873672	0
Q08269	ALR1	850	_S[Phospho (STY)]VAS[Phospho (STY)]LPSR_.1	7050.63		637.947			144.037		2610.87	3	8567.36	6154.24			127.322		7737.95	5646.72	4	0.46237	0.696262	-1	4493.82							4493.82	1	6627.6					6899.55	433.486	4653.55	3	0.965676	0.989637	-2
Q08269	ALR1	853	_SVAS[Phospho (STY)]LPS[Phospho (STY)]R_.2	75815.1	48603.8	42563.2	55008.6	45391.7	55553.5	51826.9	53537.6	7	47141.8	74510.8	59037.6	75442.4	54307	68995.1	51721.3	61593.7	7	0.869205	0.554871	0	81089.4	70122.8	84646.2	85896.6	82274.8	88725.7	78896.2	81664.5	7	81163.7	126218	128151	120998	89626.6	88796.8	88828.1	103398	7	0.789811	0.123253	0
Q08269	ALR1	853	_SVASLPS[Phospho (STY)]R_.2			4167.37				4641.48	4404.43	2		31625.8		25638.9	16962.5	16197		22606	4	0.194834	0.191854	-2	90003	21502.3	25817.1	24814	17578.1	25387.8	31361.9	33780.6	7		46017.4	62194.8		25450	5748.75		34852.7	4	0.969238	0.980685	3
Q08269	ALR1	853	_SVAS[Phospho (STY)]LPS[Phospho (STY)]RYS[Phospho (STY)]R_.2				10523.5			8120.59	9322.06	2	7475.83	8720.41	9683.45	12599	8739.87	11828	7639.96	9526.64	7	0.978525	0.968905	-5	8450.07	11258.9	14649.6	11559.1	12919.5	15219.8		12342.8	6	15200.4	20390.7	22966.7	15438.9	17045.8	20286.1	16111.4	18205.7	7	0.677965	0.0303717	-1
Q08269	ALR1	853	_S[Phospho (STY)]VAS[Phospho (STY)]LPS[Phospho (STY)]R_.2		1028.47	6056.62	6629.36	5591.11	7931.81	7728.54	5827.65	6	1305.86	13962	4086.76	6577.63	5063.74	10584.5	6061.36	6805.99	7	0.856254	0.85881	-1	4661.1	10086.9	14338	13972.6	17630.2	14397.3	6325.91	11630.3	7	11902.7	24547.3	33397.5	20326.7	13117.8	22950.7	14228.7	20067.3	7	0.579562	0.16132	0
Q08269	ALR1	856	_SVAS[Phospho (STY)]LPS[Phospho (STY)]RYS[Phospho (STY)]R_.2				10523.5			8120.59	9322.06	2	7475.83	8720.41	9683.45	12599	8739.87	11828	7639.96	9526.64	7	0.978525	0.968905	-5	8450.07	11258.9	14649.6	11559.1	12919.5	15219.8		12342.8	6	15200.4	20390.7	22966.7	15438.9	17045.8	20286.1	16111.4	18205.7	7	0.677965	0.0303717	-1
P52893	ALT1	77	_S[Phospho (STY)]LSGQSSLNDLR_.2	6239.31			7962.43			7796.92	7332.89	3									0			3									0		7340.31				6759.34	7219.32	7106.32	3			-3
P52893	ALT1	79	_SLS[Phospho (STY)]GQSSLNDLR_.2	15991	16974	16074.1	16428.7	14792.3	13863	12574.6	15242.5	7	10400	10876.1	11518.2	11171.7	9381.75	11078.9	12194	10945.8	7	1.39255	0.0013325	0	14102.6	12964.3	12795.2	13050.3	12972.9	12203.1	12615.9	12957.8	7	10421.1	13804.7	11777.8	12509.6	11403.9	12202.3	12245.2	12052.1	7	1.07515	0.274836	0
P36117	ALY1	174	_DNSNLS[Phospho (STY)]LDAYER_.2	3979.15	4780.83	5482.49	5865.33	7381.3		5414.9	5484	6	7620.23	9313.25	6626.29	8647	6347.69	6190.37	8773.62	7645.49	7	0.717286	0.0819718	-1	4061.37	5145.6	4882.17	3961.72	4471.43	6028.96	4929.15	4782.91	7	2497.32	5015.62	5608.97	5492.54	4956.36	5730.35	5416.41	4959.65	7	0.964364	0.893553	0
P36117	ALY1	182	_NS[Phospho (STY)]LSSDNLSNKPVSSDVSHDDSK_.3	6662.7	11251.9	7586.4	6687.37	6575.27	10438.7	10610.6	8544.71	7	9843.61		6756.58	7549.57	6896.51	6026.92	6814.07	7314.54	6	1.16818	0.602812	1	11626.5		11132.5		6532.21	8399.78	9829.8	9504.16	5		3109.62		3844	8397.07	6084.56	9442.74	6175.6	5	1.53899	0.26595	0
P36117	ALY1	184	_NSLS[Phospho (STY)]SDNLSNKPVSSDVSHDDSK_.3	62508.5	139593	90170.4		96927	119082		101656	5	228533	79128.1	148391	153218		143193	149794	150376	6	0.676013	0.338613	-1		78712.4	112838	75513.1	73501.8	90816.4	132310	93948.6	6		72261.9	103218	90970.9	159868			106580	4	0.881487	0.789013	2
P36117	ALY1	184	_NSLS[Phospho (STY)]SDNLSNKPVSSDVSHDDSK_.2									0	14957.5							14957.5	1			-1	7618.54							7618.54	1	12397.7							12397.7	1	0.614515		0
P36117	ALY1	185	_NSLSS[Phospho (STY)]DNLSNKPVSSDVSHDDSK_.3							111977	111977	1									0			1									0									0			0
P36117	ALY1	569	_EVLSS[Phospho (STY)]PVLSPNVQK_.2	108823	73391.9	100942	86839.9	89423.2	63608.5	59578.2	83229.5	7	150302	96212.6	78187.7	81152.9	71113	84452	106167	95369.6	7	0.872705	0.695218	0	113340	83503.4	68847.8	79859.2	70081.6	66372.2	75334.5	79619.8	7	91429.9	73712.7	62160.1	81944.9	66997.4	72767.8	80328.6	75620.2	7	1.05289	0.819032	0
P36117	ALY1	569	_EVLSS[Phospho (STY)]PVLS[Phospho (STY)]PNVQK_.2			1673.14					1673.14	1						2740.02		2740.02	1	0.61063		0				716.479		1364.48		1040.48	2					1171.3			1171.3	1	0.888314	0.946882	1
P36117	ALY1	573	_EVLSSPVLS[Phospho (STY)]PNVQK_.2	21165.7	14177.9	21837.3	19330.8	18072.1	13809.6	13657.6	17435.9	7	28004.3	22746.1	18858.9	19422.1	16418.3	19602.4	22026.3	21011.2	7	0.829835	0.369657	0	20184.6	16440.1	15454.1	17042.5	15137.3	13415.8	14752.1	16060.9	7	18181.3	17436.7	14151.7	18347.2	14719.6	14360	17229.3	16346.5	7	0.982529	0.92206	0
P36117	ALY1	573	_EVLSS[Phospho (STY)]PVLS[Phospho (STY)]PNVQK_.2			1673.14					1673.14	1						2740.02		2740.02	1	0.61063		0				716.479		1364.48		1040.48	2					1171.3			1171.3	1	0.888314	0.946882	1
P36117	ALY1	585	_IPS[Phospho (STY)]DLPVVR_.2	281590	254432	349762	349070	311121	277078	238446	294500	7					3210.82		3464.48	3337.65	2	88.2357	0.00144627	5	239006	255391	226974	269811	229584	213428	222716	236702	7		3402.21		3695.91	5695.83	5799.27		4648.3	4	50.9221	3.93651e-07	3
P36117	ALY1	824	_SQS[Phospho (STY)]LNFNK_.2	37631	29010.2	35789.5	33199.4	33603.4	28545.3	26018.4	31971	7	44775.1	38029.3	32712	36649.5	31059.5	33629	43028.3	37126.1	7	0.861147	0.306043	0	40229.7	30815.2	27228.1	29152.4	29134.8	29284.8	28886.3	30675.9	7	42413.4	40582.6	42554.6	35428.8	35022	42678.6	49206.6	41126.7	7	0.745889	0.0140644	0
P47029	ALY2	9	_PMDQSISS[Phospho (STY)]PLFPMEK_.2	31417.4			15466.3				23441.9	2	26771.3							26771.3	1	0.875632	0.950704	1	17225		12188.6		11846.3			13753.3	3	22420.2	22535.5	16261.8	16499.3	13224.1	15452.4	19373.2	17966.6	7	0.765491	0.374095	-4
P47029	ALY2	155	_TLS[Phospho (STY)]DNETITS[Phospho (STY)]R_.2	12027.6	11223	12475.7	14790.3	11854.5	11331.4	10452	12022.1	7	8320.01	11297.6	9370.78	9749.13	7676.55	10327.5	11978.9	9817.22	7	1.22459	0.121086	0	9029.05		11887.9	10182.8	11075.5	11029.4	9164.36	10394.8	6	12016	14043.5			11144.5	12003.2	10061.3	11853.7	5	0.876925	0.3364	1
P47029	ALY2	155	_TLS[Phospho (STY)]DNETITSR_.2	275703	175472	197051	213593	200787	186949	166354	202273	7	243967	216852	187634	195580	159607	198498	227208	204192	7	0.990599	0.972965	0	274621	192045	181023	201307	185990	187546	169501	198862	7	243469	238544	201907	222806	202996	209582	228097	221057	7	0.899593	0.442414	0
P47029	ALY2	155	_TLS[Phospho (STY)]DNETITSR_.1	8177.14							8177.14	1		1031.83		1857.93	1912.16	1500.54		1575.61	4	5.18981	0.0123994	-3	2313.23							2313.23	1	5315.34	995.544		628.382				2313.09	3	1.00006	0.999991	-2
P47029	ALY2	162	_TLSDNETITS[Phospho (STY)]R_.2	409863	254923	260710	297182	253416	241825	242038	279994	7	278290	226604	197062	224815	158766	217906	243934	221054	7	1.26663	0.254901	0	271048	189141	228078	209048	222021	221620	187190	218307	7	269025	281821	278990	254260	216923	259668	288337	264146	7	0.826461	0.0565151	0
P47029	ALY2	162	_TLS[Phospho (STY)]DNETITS[Phospho (STY)]R_.2	12027.6	11223	12475.7	14790.3	11854.5	11331.4	10452	12022.1	7	8320.01	11297.6	9370.78	9749.13	7676.55	10327.5	11978.9	9817.22	7	1.22459	0.121086	0	9029.05		11887.9	10182.8	11075.5	11029.4	9164.36	10394.8	6	12016	14043.5			11144.5	12003.2	10061.3	11853.7	5	0.876925	0.3364	1
P47029	ALY2	168	_KNSIS[Phospho (STY)]GLSSLNLSPLGAPGNSSVNVK_.3							38087.1	38087.1	1			33467.8		22584.9			28026.4	2	1.35897	0.784653	-1					16206.2		33028.2	24617.2	2					39701.2		26047.9	32874.5	2	0.748822	0.786593	0
P47029	ALY2	201	_SSS[Phospho (STY)]VTSSNGPSR_.2		34153.8	42215.7	59053	40120.1	40995	65604	47023.6	6	19052	106869	57864.2	71399.2	32955.5	120633	48102	65267.9	7	0.720471	0.636202	-1		30265.4	58302.9	40406.8	54113.4	50882.8	38873.6	45474.1	6	12113.9	127192	77627.1	89398.9	83644.5	66763.7		76123.4	6	0.597374	0.310928	0
P47029	ALY2	201	_SSS[Phospho (STY)]VTS[Phospho (STY)]SNGPSR_.2							12187	12187	1									0			1					7660.1			7660.1	1				10758.8	13974.6			12366.7	2	0.619412	0.65548	-1
P47029	ALY2	203	_SSSVT[Phospho (STY)]SSNGPSR_.2									0									0			0									0		9218.34	8388.17					8803.25	2			-2
P47029	ALY2	204	_SSSVTS[Phospho (STY)]SNGPSR_.2							2897.12	2897.12	1			3441.62		3132.32	6479.31		4351.08	3	0.66584	0.828937	-2			7499.88		4707.51		3999.09	5402.16	3	1085.32				4775.84			2930.58	2	1.84337	0.610816	1
P47029	ALY2	204	_SSS[Phospho (STY)]VTS[Phospho (STY)]SNGPSR_.2							12187	12187	1									0			1					7660.1			7660.1	1				10758.8	13974.6			12366.7	2	0.619412	0.65548	-1
P47029	ALY2	213	_NLS[Phospho (STY)]PINLLK_.2	170611	199164	298457	236658	235010	178604	166985	212213	7	205149	189667	187205	197369	171987	204601	255076	201579	7	1.05275	0.851548	0	170250	237601	172526	207483	174742	170468	196171	189892	7	149601	233645	178152	203134	191687	188466	214047	194105	7	0.978296	0.911323	0
P47029	ALY2	581	_EVLS[Phospho (STY)]S[Phospho (STY)]PVLSPNVQPLDILIPHLPSTSLTR_.3	7835.79					1317.6		4576.7	2			893.806					893.806	1	5.12046	0.85978	1		6102.14	1665.1				1396.06	3054.43	3									0			3
P47029	ALY2	582	_EVLS[Phospho (STY)]S[Phospho (STY)]PVLSPNVQPLDILIPHLPSTSLTR_.3	7835.79					1317.6		4576.7	2			893.806					893.806	1	5.12046	0.85978	1		6102.14	1665.1				1396.06	3054.43	3									0			3
P47029	ALY2	586	_EVLSSPVLS[Phospho (STY)]PNVQPLDILIPHLPSTSLTR_.3						17615.8	77637.6	47626.7	2					9955.67			9955.67	1	4.78388	0.845567	1			7110.23					7110.23	1						6737.42		6737.42	1	1.05533		0
P47029	ALY2	723	_HPT[Phospho (STY)]PPSLK_.2		19339.1		8605.58	7503.21	10675.7	14139.8	12052.7	5	41088.9	10003.4	15805.3	10637.3	15843.8		22784.3	19360.5	6	0.622541	0.579006	-1	40425.8		8499.8	7838.5	2135.62	3758.98	14368.3	12837.8	6	57463.7	4693.14	21122.8	13593.1	27777.7	16744.5	39662.2	25865.3	7	0.496334	0.478721	-1
P47029	ALY2	726	_HPTPPS[Phospho (STY)]LK_.2						603.568	1604.8	1104.18	2	3086.13						2082.85	2584.49	2	0.427234	0.515734	0	3699.1		1498.79		914.422	584.318	1315.57	1602.44	5	5079.37				2470.3		3857.69	3802.45	3	0.421422	0.238335	2
P47029	ALY2	774	_S[Phospho (STY)]LSTPQR_.2		29370.4	27906.4	37782.1	27944.6	29084.5	27800.9	29981.5	6	10620.2	20898	20954.1	23980.7	14975.3	23246.1	30999.3	20810.5	7	1.44069	0.103233	-1		19476	24670.2		25287.4	21886.6	19649.1	22193.8	5			17720.3			18041.5	19415.7	18392.5	3	1.20668	0.264368	2
P47029	ALY2	776	_SLS[Phospho (STY)]TPQR_.2	11878	9829.2	11713.3	12815.3	8820.46	12949.7	10363.7	11195.7	7	7221.03	11841	11780.7	12055.8	7302.77	10463.7	14411.1	10725.2	7	1.04387	0.888299	0	6769.61	8189.33	9736.41	10137.3	9989.98	9517.39	7985.81	8903.69	7	7022.71	6329.52	5768.8	5839.33	8082.7		6208.69	6541.96	6	1.36101	0.0289075	1
P47029	ALY2	777	_SLST[Phospho (STY)]PQR_.2	34654.2	205339	255137	326814	215918	180429	231550	207120	7	141947	479173	314180	297234	241099	451022	316891	320221	7	0.646804	0.303467	0	33734.7	201027	304821	252682	260684	256378	202028	215908	7	154969	860253	594867	723895	634346	593909	302562	552114	7	0.391056	0.0441896	0
P47029	ALY2	777	_SLST[Phospho (STY)]PQREESK_.2									0									0			0									0	13549.8	3486.73	3471.48	4301.77		4703.27	7139.89	6108.82	6			-6
P47029	ALY2	838	_RES[Phospho (STY)]VQDNLPSTIR_.3	16468.3	52631.2	5824.52	12098.9	10449	25941.4	37216.3	22947.1	7	51188.7	10806.5	26323	39653.7	26701.7	22773.1	28301.5	29392.6	7	0.78071	0.758446	0	36187.8	11837.6	31612	5212.1	10827.3	25649.8	33892	22174.1	7	54585.9	6594.89	15506.9	12428.1	29509.9	18695	26014.4	23333.6	7	0.950308	0.95768	0
P47029	ALY2	838	_RES[Phospho (STY)]VQDNLPSTIR_.2	10139.1	44095.6	6145.53	7390.93	9572.09	25374.6	26584.6	18471.8	7	33675.1	12577.3	22028.3	27848.6	22681.4	16444.7	18488.7	21963.4	7	0.841024	0.830788	0	26304.2	9449.85	21482.4	1951.19	8620.26	13165.7	22517.1	14784.4	7	38827	3606.94	12223.5	6316.3	27016.5	11427.3	29063.3	18354.4	7	0.805496	0.808153	0
P47029	ALY2	838	_ES[Phospho (STY)]VQDNLPSTIR_.2	27635.9			18839.7				23237.8	2	23829.3							23829.3	1	0.975179	0.984973	1	21369.1							21369.1	1	24204							24204	1	0.882875		0
P47029	ALY2	890	_S[Phospho (STY)]SFDYSGINISK_.2		104874		108585	98005.1			103822	3	47710.9			47437.9	42579.2			45909.3	3	2.26145	0.00228723	0			74281.6				73151.7	73716.6	2	59992.6					95530.3	87440.8	80987.9	3	0.910218	0.847176	-1
P47029	ALY2	891	_SS[Phospho (STY)]FDYSGINISK_.2							95337.5	95337.5	1							64261	64261	1	1.4836		0					80989.1			80989.1	1									0			1
P47029	ALY2	895	_SSFDYS[Phospho (STY)]GINISK_.2									0									0			0									0			44045.4					44045.4	1			-1
P47029	ALY2	900	_SSFDYSGINIS[Phospho (STY)]K_.2	39797.6	40609.5	43881.8	43380.1	43920.7	44067.6	40237.1	42270.6	7	51358.3	85842.6	73753.9	74032.6	67112.4	71910.8	71081	70727.4	7	0.597656	0.000511483	0	39154.8	42928.4	39660.5	44121.4	42611.5	41445.6	40826.9	41535.6	7	42544.7	95396.2	89187.7	84483	76370.4	78154.2	56212.6	74621.2	7	0.556619	0.00815908	0
P47029	ALY2	911	_LNMEPLLS[Phospho (STY)]K_.2	14210.6	12542.4	12180.2	14109.8	12977.7	11988.9	11882	12841.7	7	21161.1	24567.7	20498	21437	17843.9	21472.7	24147.4	21589.7	7	0.594805	5.7307e-05	0	12233.4	14381.2	14911.1	13249.1	14328.4	14385.7	12204.7	13670.5	7	8122.39	22807.3	18921.8	17644.9	15538.8	16884.7	9936.28	15693.7	7	0.871081	0.643441	0
P47029	ALY2	1022	_FISRLS[Phospho (STY)]S[Phospho (STY)]PEK_.2									0	8791.07				200.577	761.964		3251.2	3			-3							971.583	971.583	1	21940.5				1901.09	1999.01	8007.77	8462.09	4	0.114816	0.788155	-3
P47029	ALY2	1023	_FISRLS[Phospho (STY)]S[Phospho (STY)]PEK_.2									0	8791.07				200.577	761.964		3251.2	3			-3							971.583	971.583	1	21940.5				1901.09	1999.01	8007.77	8462.09	4	0.114816	0.788155	-3
P15274	AMD1	50	_IGDEQAGVVVDDET[Phospho (STY)]PPLEQQDSHES[Phospho (STY)]LAADSR_.3									0				67308.4				67308.4	1			-1									0									0			0
P15274	AMD1	50	_IGDEQAGVVVDDET[Phospho (STY)]PPLEQQDSHESLAADSR_.3									0	1544.41				1479.72	2562.16		1862.09	3			-3				2332.88			3359.69	2846.28	2			2051.44	2903.87				2477.66	2	1.14878	0.846915	0
P15274	AMD1	58	_IGDEQAGVVVDDETPPLEQQDS[Phospho (STY)]HES[Phospho (STY)]LAADSR_.3		66942.6	55337.2			60110.7		60796.8	3			56720.1					56720.1	1	1.07187	0.848713	2									0	81985.8	70372.9			50869.5			67742.7	3			-3
P15274	AMD1	58	_IGDEQAGVVVDDETPPLEQQDS[Phospho (STY)]HES[Phospho (STY)]LAADSR_.4						7074.88		7074.88	1	11683.4	8486.35						10084.9	2	0.701532	0.781018	-1		7478.29						7478.29	1									0			1
P15274	AMD1	58	_IGDEQAGVVVDDETPPLEQQDS[Phospho (STY)]HESLAADSR_.3			17817.9	18308.9	30434.4		31861.9	24605.8	4							18646.2	18646.2	1	1.31961	0.812687	3			17819.4	68714.2		27814.1	23868	34553.9	4						13309.5	13938.3	13623.9	2	2.53627	0.61116	2
P15274	AMD1	61	_IGDEQAGVVVDDET[Phospho (STY)]PPLEQQDSHES[Phospho (STY)]LAADSR_.3									0				67308.4				67308.4	1			-1									0									0			0
P15274	AMD1	61	_IGDEQAGVVVDDETPPLEQQDS[Phospho (STY)]HES[Phospho (STY)]LAADSR_.3		66942.6	55337.2			60110.7		60796.8	3			56720.1					56720.1	1	1.07187	0.848713	2									0	81985.8	70372.9			50869.5			67742.7	3			-3
P15274	AMD1	61	_IGDEQAGVVVDDETPPLEQQDS[Phospho (STY)]HES[Phospho (STY)]LAADSR_.4						7074.88		7074.88	1	11683.4	8486.35						10084.9	2	0.701532	0.781018	-1		7478.29						7478.29	1									0			1
P15274	AMD1	61	_IGDEQAGVVVDDETPPLEQQDSHES[Phospho (STY)]LAADSR_.3									0			15862.3					15862.3	1			-1									0									0			0
P15274	AMD1	138	_TLS[Phospho (STY)]ASAQHILPETLK_.2	333085	390986	342828	323739	400078	319954	356345	352431	7	789351	376227	333402	317142	325513	263655	401221	400930	7	0.879033	0.78918	0	807280	549036	465445	380947	408355	420108	539605	510111	7	39973.1	399513	484521	458988	540396	597375	546079	438121	7	1.16432	0.731678	0
P15274	AMD1	138	_TLS[Phospho (STY)]ASAQHILPETLK_.3	123512	78849	70098.3	95685.1	93161.9	81669.2	88720.6	90242.3	7	220471	116219	89971.9	83056.9	78095.4	51676.3	86227.2	103674	7	0.870443	0.820454	0	301979	169436	105839	96317.8	87138.3	96585.8	118526	139403	7	485029	120804	108037	113598	120309	113139	333641	199222	7	0.699736	0.678248	0
P15274	AMD1	151	_S[Phospho (STY)]FAGAPVVNK_.2	7207.02		4665.36	1955.85	4577.19	4359.03	3771.65	4422.68	6		6192.32	4868.38		5097.65	5839.95	3742.99	5148.26	5	0.859064	0.748791	1	5373.63	6985.35	4833.72	5579.72	4294.58	5924.18	5832.36	5546.22	7	4658.5	6154.1	7585.24	6815.3	4240.18	4067.24	3644.34	5309.27	7	1.04463	0.892735	0
P38313	AME1	41	_EENS[Phospho (STY)]PIQSPVQPILS[Phospho (STY)]SPK_.2	67637.3							67637.3	1	80786.9							80786.9	1	0.837231		0									0	54478.5							54478.5	1			-1
P38313	AME1	41	_EENS[Phospho (STY)]PIQSPVQPILSS[Phospho (STY)]PK_.2									0									0			0									0		59528.4	49153.2					54340.8	2			-2
P38313	AME1	41	_EENS[Phospho (STY)]PIQSPVQPILSSPK_.2	46727.8	22993.2	30800.4	36406	20386	25196.2	23634.4	29449.1	7	44197.4	37473.4	28676.7	32612.5	26157.3	38531.4	35808	34779.5	7	0.846738	0.588696	0	44162.7	25926.2	31066.3	26062	25234	23821.4	20424.1	28099.5	7	45092.4	44934.4	49004.5	48196.9	35698.6	41744.2	45529	44314.3	7	0.634096	0.00656365	0
P38313	AME1	41	_EENS[Phospho (STY)]PIQSPVQPILSSPK_.3	10014.5							10014.5	1					3785.95			3785.95	1	2.64519		0									0	9119.88				3308.97		6456.13	6294.99	3			-3
P38313	AME1	41	_EENS[Phospho (STY)]PIQS[Phospho (STY)]PVQPILSSPK_.2	15795		9740.29	10919.2				12151.5	3	17143.3			10908.1		12844		13631.8	3	0.891407	0.845868	0	12494.4							12494.4	1	18098.2	17740.1	15863.2	14944.1			13394.1	16008	5	0.780513	0.478328	-4
P38313	AME1	41	_EENS[Phospho (STY)]PIQS[Phospho (STY)]PVQPILSS[Phospho (STY)]PK_.2				37033.3	37536			37284.6	2		29710.7				32683	24615.2	29003	3	1.28554	0.325524	-1	64710.6	32021.6	25396.1		30837.2			38241.4	4		42633.7	37347.8			34326.5		38102.7	3	1.00364	0.99611	1
P38313	AME1	41	_EENS[Phospho (STY)]PIQS[Phospho (STY)]PVQPILSS[Phospho (STY)]PK_.3	8373.86							8373.86	1	1792.84							1792.84	1	4.67072		0	6527.53	145.164			459.798			2377.5	3	1883.76						217.883	1050.82	2	2.26252	0.860271	1
P38313	AME1	45	_EENSPIQS[Phospho (STY)]PVQPILS[Phospho (STY)]S[Phospho (STY)]PK_.2	73095.4	27467.1		142627	226056		200192	133887	5	239733	199855	201316	206145	181550	132779	202504	194840	7	0.687165	0.399704	-2	211101		217311		248593			225669	3	289496		258978	175284				241253	3	0.935404	0.874215	0
P38313	AME1	45	_EENSPIQS[Phospho (STY)]PVQPILSS[Phospho (STY)]PK_.2		20489.1	19514.1				16053.8	18685.7	3									0			3					14941.5			14941.5	1							19533.5	19533.5	1	0.764915		0
P38313	AME1	45	_EENSPIQS[Phospho (STY)]PVQPILS[Phospho (STY)]SPK_.2									0				17367.9				17367.9	1			-1									0									0			0
P38313	AME1	45	_EENS[Phospho (STY)]PIQS[Phospho (STY)]PVQPILSSPK_.2	15795		9740.29	10919.2				12151.5	3	17143.3			10908.1		12844		13631.8	3	0.891407	0.845868	0	12494.4							12494.4	1	18098.2	17740.1	15863.2	14944.1			13394.1	16008	5	0.780513	0.478328	-4
P38313	AME1	45	_EENS[Phospho (STY)]PIQS[Phospho (STY)]PVQPILSS[Phospho (STY)]PK_.2				37033.3	37536			37284.6	2		29710.7				32683	24615.2	29003	3	1.28554	0.325524	-1	64710.6	32021.6	25396.1		30837.2			38241.4	4		42633.7	37347.8			34326.5		38102.7	3	1.00364	0.99611	1
P38313	AME1	45	_EENS[Phospho (STY)]PIQS[Phospho (STY)]PVQPILSS[Phospho (STY)]PK_.3	8373.86							8373.86	1	1792.84							1792.84	1	4.67072		0	6527.53	145.164			459.798			2377.5	3	1883.76						217.883	1050.82	2	2.26252	0.860271	1
P38313	AME1	52	_EENSPIQS[Phospho (STY)]PVQPILS[Phospho (STY)]S[Phospho (STY)]PK_.2	73095.4	27467.1		142627	226056		200192	133887	5	239733	199855	201316	206145	181550	132779	202504	194840	7	0.687165	0.399704	-2	211101		217311		248593			225669	3	289496		258978	175284				241253	3	0.935404	0.874215	0
P38313	AME1	52	_EENSPIQSPVQPILS[Phospho (STY)]SPK_.2									0									0			0									0					149035			149035	1			-1
P38313	AME1	52	_EENSPIQSPVQPILS[Phospho (STY)]SPK_.3					7311.41			7311.41	1	18188.7							18188.7	1	0.401976		0		4666.17	2232.9					3449.54	2	13377.3		2893.97					8135.61	2	0.424005	0.757915	0
P38313	AME1	52	_EENS[Phospho (STY)]PIQSPVQPILS[Phospho (STY)]SPK_.2	67637.3							67637.3	1	80786.9							80786.9	1	0.837231		0									0	54478.5							54478.5	1			-1
P38313	AME1	52	_EENSPIQS[Phospho (STY)]PVQPILS[Phospho (STY)]SPK_.2									0				17367.9				17367.9	1			-1									0									0			0
P38313	AME1	53	_EENSPIQS[Phospho (STY)]PVQPILS[Phospho (STY)]S[Phospho (STY)]PK_.2	73095.4	27467.1		142627	226056		200192	133887	5	239733	199855	201316	206145	181550	132779	202504	194840	7	0.687165	0.399704	-2	211101		217311		248593			225669	3	289496		258978	175284				241253	3	0.935404	0.874215	0
P38313	AME1	53	_EENSPIQSPVQPILSS[Phospho (STY)]PK_.2		159301	207208			160459		175656	3		195292		179665		182152		185703	3	0.945898	0.834053	0		159156				152255		155705	2	184434	181773	178874					181694	3	0.856966	0.0400041	-1
P38313	AME1	53	_EENS[Phospho (STY)]PIQSPVQPILSS[Phospho (STY)]PK_.2									0									0			0									0		59528.4	49153.2					54340.8	2			-2
P38313	AME1	53	_EENSPIQS[Phospho (STY)]PVQPILSS[Phospho (STY)]PK_.2		20489.1	19514.1				16053.8	18685.7	3									0			3					14941.5			14941.5	1							19533.5	19533.5	1	0.764915		0
P38313	AME1	53	_EENS[Phospho (STY)]PIQS[Phospho (STY)]PVQPILSS[Phospho (STY)]PK_.2				37033.3	37536			37284.6	2		29710.7				32683	24615.2	29003	3	1.28554	0.325524	-1	64710.6	32021.6	25396.1		30837.2			38241.4	4		42633.7	37347.8			34326.5		38102.7	3	1.00364	0.99611	1
P38313	AME1	53	_EENS[Phospho (STY)]PIQS[Phospho (STY)]PVQPILSS[Phospho (STY)]PK_.3	8373.86							8373.86	1	1792.84							1792.84	1	4.67072		0	6527.53	145.164			459.798			2377.5	3	1883.76						217.883	1050.82	2	2.26252	0.860271	1
P38313	AME1	59	_LANS[Phospho (STY)]FEFPITTNNVNAQDR_.2	55256.5	36175.3	43021.9	42178.3	40044.6	35767.2	35307.2	41107.3	7	70415.4	51589.5	46684.5	44125.8	39995.3	45561.4	62259.5	51518.8	7	0.797908	0.278944	0	43504.2	37352.1	33280.4	33115.8	35221.4	33283.7	30896	35236.2	7	14672.6	16108	12705	12407.8				13973.4	4	2.52167	0.000172967	3
P38313	AME1	59	_LANS[Phospho (STY)]FEFPITTNNVNAQDR_.3	10769.8	5218.42	5614.56	4801.67	4019.69	3156.27	3295.66	5268.01	7	14724.5	9907.7	3354.74	5191.8	2909.93		7443.99	7255.43	6	0.726078	0.692836	1	9263.15	4802.65						7032.9	2									0			2
P38313	AME1	278	_IMSQDS[Phospho (STY)]EDDSIR_.2	11541.2	8467.68	8054.9	11549.8	8806.95	9587.99	9475.48	9640.57	7	9254.59	7318.2	5305.7	4342.19	4852.84	5768.3	9838.84	6668.67	7	1.44565	0.0928735	0	8852.99	6662.06	7750.79	8960.43	10467.3	8806.13	6204.09	8243.4	7	6218.71	15693.1	9850.75	9315.01	10937.3	11739.6	10273.9	10575.5	7	0.779483	0.302283	0
P38285	AMN1	23	_DIQSLES[Phospho (STY)]PC[Carbamidomethyl (C)]TR_.2	9907.75	10467	10584.7	13770.2	10136	9706.7	10229.4	10686	7					3023.58			3023.58	1	3.53421	0.0288482	6		10079.4	9188.81	9363.26		9805.3	9693.81	9626.12	5									0			5
P38285	AMN1	33	_MS[Phospho (STY)]PSPSFTSLK_.2	6280.63	4710.73	8534	5805.59	7434.46	6501.04	4981.05	6321.07	7			1128.8				2471.07	1799.93	2	3.51184	0.0402659	5	6604.21	6158.53	4785.2	6050.42	5073.87	4197.65	4535.06	5343.56	7									0			7
P38285	AMN1	37	_MSPSPS[Phospho (STY)]FTSLK_.2	21054.5					17124.4	16500.6	18226.5	3									0			3									0									0			0
P38285	AMN1	39	_MSPSPSFT[Phospho (STY)]SLK_.2									0							7315.71	7315.71	1			-1									0									0			0
P38285	AMN1	105	_SC[Carbamidomethyl (C)]NEYLST[Phospho (STY)]PEAT[Phospho (STY)]PLK_.2	57966.8	34105.8	37262.5	50120.4	35587.4	36562.5	38879	41497.8	7	15399	13496.9	9692.66	12913.1	12195.4	12553.8	12228.8	12640	7	3.28306	0.000148196	0	19482.3	35284.8	33840.9	35395.7	33546.1	36767.6	31180.2	32213.9	7	13655.7	14476.2	14623.8	12724.9	8261.43	13269.1	13966	12996.8	7	2.47861	0.000123273	0
P38285	AMN1	105	_SC[Carbamidomethyl (C)]NEYLST[Phospho (STY)]PEATPLK_.2	75039.7	55729.8	56816.5	65010.3	53352.9	46971.2	51585.3	57786.5	7	19707.4				14067.2	13269.9	16490.3	15883.7	4	3.6381	0.000574153	3	24761.6	50321.6	46635.9	49127.7	46686	45593.1	49148.3	44610.6	7	17346.4	15258.9	15497.9			15146.9		15812.5	4	2.82122	0.00260326	3
P38285	AMN1	109	_SC[Carbamidomethyl (C)]NEYLST[Phospho (STY)]PEAT[Phospho (STY)]PLK_.2	57966.8	34105.8	37262.5	50120.4	35587.4	36562.5	38879	41497.8	7	15399	13496.9	9692.66	12913.1	12195.4	12553.8	12228.8	12640	7	3.28306	0.000148196	0	19482.3	35284.8	33840.9	35395.7	33546.1	36767.6	31180.2	32213.9	7	13655.7	14476.2	14623.8	12724.9	8261.43	13269.1	13966	12996.8	7	2.47861	0.000123273	0
P38285	AMN1	109	_SC[Carbamidomethyl (C)]NEYLSTPEAT[Phospho (STY)]PLK_.2	20575.7	13815.4	13033.7	16135.3	10441.2	11746.7	13408.3	14165.2	7			2835.73	3436.74	3083.89	2667.27	2888.57	2982.44	5	4.74953	0.000896173	2	4602.22	12655	14567.2	11726.9	12045.9	14671.8	12554.1	11831.9	7		3919.03	4359.64	2817.55			5830.52	4231.69	4	2.79602	0.0237228	3
P38285	AMN1	127	_VVS[Phospho (STY)]ASSLSIVTPTEIK_.2	43528.9	54351.1	54619.6	63388.4	47461.9	45834.6	46573.7	50822.6	7									0			7	28912.5	36922.5	31627.9	40883	32919.6	29738.5	30201.2	33029.3	7									0			7
P38285	AMN1	127	_VVS[Phospho (STY)]ASSLSIVT[Phospho (STY)]PTEIK_.2	35999.2	31382.1	33923.6	33592.9	30204.7	31896.9	32017.3	32716.7	7									0			7	25821.4	22440.1	22311.9	30621.8	24845.8	20982.9	19841.5	23837.9	7									0			7
P38285	AMN1	135	_VVSASSLSIVT[Phospho (STY)]PTEIK_.2	34328		24568.8	44232.8	31285.4	38914.9	39700.5	35505.1	6	14476	5886.81		4898.12	5226.28		15800.1	9257.47	5	3.83529	0.00218008	1	25367.5	20496.5	23523.6	30455.8	31889.4	26401.7	20153.4	25469.7	7	12200.5	8936.83	4978.67	4554.57	7975.98	11053.7		8283.36	6	3.0748	0.000252322	1
P38285	AMN1	135	_VVS[Phospho (STY)]ASSLSIVT[Phospho (STY)]PTEIK_.2	35999.2	31382.1	33923.6	33592.9	30204.7	31896.9	32017.3	32716.7	7									0			7	25821.4	22440.1	22311.9	30621.8	24845.8	20982.9	19841.5	23837.9	7									0			7
P38285	AMN1	360	_LSQS[Phospho (STY)]IPNLK_.2	9956.87	9341.88	10726.6	9374.88	9418.81	7768.01	7939.24	9218.04	7									0			7	5053.75	7038.66	4521.36	6156.35	5757.95	6021.8	6188.47	5819.76	7									0			7
P38285	AMN1	527	_INS[Phospho (STY)]LVALK_.2	20951.8	21399.3	31553.3	23449.6	28204.5	19824.5	20080.6	23637.6	7	3281.01	3438.22	1952.74	1966.67	2295.4	2452.34	4089.86	2782.32	7	8.49566	7.42081e-06	0	13148.1	18090.4	12499.2	16766.3	13997.9	14882.7	15552.9	14991.1	7	758.224		497.256	1131.38	767.049	480.091	518.012	692.002	6	21.6633	3.53872e-07	1
P16550	APA1	17	_S[Phospho (STY)]AFDNGNLK_.2	18869	6182.38	11143.2	5407.4	10516.5	10417.6	9857.42	10341.9	7	6194	14699.9	12956.6	15132.7	12726.9	14554.1	5438.35	11671.8	7	0.886063	0.830424	0	19634.4	14953.1	15029.8	14444.3	13462.6	16898.3	15964.8	15769.6	7	10363.7	15948.3	17653.8	16617	11528.8	10624.5		13789.4	6	1.14361	0.523512	1
P16550	APA1	60	_GQT[Phospho (STY)]PEGEDPLGKPEEELTVIPEFGGADNK_.3	77516.8	131332	107734	102699	111949	109666	93450	104907	7	83412.3	84554.7	106173	100841	79360.1	72078.2	75914	86047.6	7	1.21917	0.209529	0	94739.3	99194.4	98357.5	109944	107081	96180.4	124240	104248	7	101986	103511	85523.2	79481.2	113022	100660	102573	98108	7	1.06259	0.634876	0
P16550	APA1	245	_S[Phospho (STY)]YNLMLTK_.2	20794.1	3831.86	10091.9	2255.11	8735.62	8509.64	8129.92	8906.87	7	4680.09	12671.7	11848.3	12116.2	11503.1	12518.3		10889.6	6	0.817923	0.784715	1	17512.9	17363.9	13121.6	11392	10756.8	14199.2	15341.5	14241.1	7	15854.5	18334.6	19215.7	13979.5	10123.3	9017.6	9081.92	13658.2	7	1.04268	0.91092	0
P53886	APC1	269	_STS[Phospho (STY)]INSNSHDFNAAER_.3	16861.4		22076.7	21271.5	23360.4	23236	22322.9	21521.5	6				3363.21	2766.99	3522.85	2370.83	3005.97	4	7.15958	3.92299e-05	2	23025.8	15439.3	19834	13516.5		18223.6	21817.6	18642.8	6	3396.4			2699.88			3941.75	3346.01	3	5.57165	0.00380532	3
P53886	APC1	269	_STS[Phospho (STY)]INSNSHDFNAAER_.2	9496.49	6185.46	4359.27			6973.5	5191.04	6441.15	5	610.613							610.613	1	10.5487	0.275371	4	14509.1			3337.12	4829.44	6631.53		7326.81	4	2161.04		1094.02					1627.53	2	4.5018	0.51337	2
P53886	APC1	269	_STS[Phospho (STY)]INS[Phospho (STY)]NSHDFNAAER_.3	11551.7							11551.7	1									0			1			4240.74		4014.58	4668.16		4307.83	3									0			3
P53886	APC1	272	_STSINS[Phospho (STY)]NSHDFNAAER_.2									0									0			0	1813.86							1813.86	1									0			1
P53886	APC1	272	_STS[Phospho (STY)]INS[Phospho (STY)]NSHDFNAAER_.3	11551.7							11551.7	1									0			1			4240.74		4014.58	4668.16		4307.83	3									0			3
P53886	APC1	308	_S[Phospho (STY)]LS[Phospho (STY)]ATLDR_.2	13808.8	15619.9	15447	14660.1	14531.1	13952.6	9904.42	13989.1	7									0			7	4140	10191.2	8789.53	9475.27	8031.76	6999.59	6716.18	7763.36	7									0			7
P53886	APC1	310	_SLS[Phospho (STY)]ATLDR_.2	203191	161060	179892	183786	178584	163615	147150	173897	7	9183.92	8254.16	7703.56	8656.46	6858.32	8094.04	8669.21	8202.81	7	21.1997	4.04621e-08	0	179957	161744	148603	155474	158026	159019	155008	159690	7	14574.5	14527.4	13549.8	13895.4	12753.3	13054	14472.5	13832.4	7	11.5446	1.20552e-10	0
P53886	APC1	310	_SLS[Phospho (STY)]ATLDR_.1	8624.25	942.432	2212.05	1606.48		1746.32	1950.92	2847.08	6	1277.96				281.035			779.495	2	3.65246	0.715459	4	7668.53		2668.88	747.989	1499.68	1408.87	961.844	2492.63	6	2719.53							2719.53	1	0.916569	0.9793	5
P53886	APC1	310	_S[Phospho (STY)]LS[Phospho (STY)]ATLDR_.2	13808.8	15619.9	15447	14660.1	14531.1	13952.6	9904.42	13989.1	7									0			7	4140	10191.2	8789.53	9475.27	8031.76	6999.59	6716.18	7763.36	7									0			7
P53886	APC1	1436	_SDVS[Phospho (STY)]GVTQVTSNTNTPGNSDR_.2									0		4579						4579	1			-1			10029.5	9858.77	6760.85			8883.02	3				6462.32	22486.4			14474.4	2	0.613707	0.725065	1
P53886	APC1	1439	_SDVSGVT[Phospho (STY)]QVTSNTNTPGNSDR_.2		3448.37						3448.37	1									0			1									0									0			0
P53886	APC1	1442	_SDVSGVTQVT[Phospho (STY)]S[Phospho (STY)]NTNTPGNSDR_.2									0		13077.4				12583.2		12830.3	2			-2									0		13999.7						13999.7	1			-1
P53886	APC1	1443	_SDVSGVTQVTS[Phospho (STY)]NTNTPGNSDR_.2	13314.9							13314.9	1	16972.2							16972.2	1	0.784517		0	20729.1							20729.1	1									0			1
P53886	APC1	1443	_SDVSGVTQVTS[Phospho (STY)]NT[Phospho (STY)]NTPGNSDR_.2			4818.81			3576.43	3311.44	3902.22	3	12237.7	11427.3	12385.9		10065.3	12296.2		11682.5	5	0.334023	0.000964718	-2			1939.6	1868.13		4930		2912.57	3		12676.7			9568.55		8550.03	10265.1	3	0.283736	0.075473	0
P53886	APC1	1443	_SDVSGVTQVT[Phospho (STY)]S[Phospho (STY)]NTNTPGNSDR_.2									0		13077.4				12583.2		12830.3	2			-2									0		13999.7						13999.7	1			-1
P53886	APC1	1445	_SDVSGVTQVTSNT[Phospho (STY)]NTPGNSDR_.2					15709.7	11282.6		13496.2	2		12997.1						12997.1	1	1.0384	0.974261	1							6222.57	6222.57	1		4632.31			10798.4			7715.34	2	0.806518	0.935227	-1
P53886	APC1	1445	_SDVSGVTQVTS[Phospho (STY)]NT[Phospho (STY)]NTPGNSDR_.2			4818.81			3576.43	3311.44	3902.22	3	12237.7	11427.3	12385.9		10065.3	12296.2		11682.5	5	0.334023	0.000964718	-2			1939.6	1868.13		4930		2912.57	3		12676.7			9568.55		8550.03	10265.1	3	0.283736	0.075473	0
P53886	APC1	1462	_VDETAAS[Phospho (STY)]LDDER_.2		18296.4	18701.2	34678.5	17687.8	16194.8	31868.2	22904.5	6	15461.6	34505.6	24003.1	22046.5	16497.2	34037.6	24027.7	24368.5	7	0.939923	0.910702	-1	13553.9	22302	20254.3	21597.6	31204.1	24821.2	21695.9	22204.1	7	8475.77	20053.8	26420.4	27623.3	18795.5	17768	17373.4	19501.5	7	1.13859	0.706225	0
Q12107	APC9	36	_ANFNNFTT[Phospho (STY)]PLR_.2	7397.14	5991.45	7657.1	6776.91	6860.15	5852.8	4987.37	6503.27	7	9561.17	9709.95	7723.62	8107.62	8306.29	10344.9	9178.37	8990.28	7	0.723367	0.00758945	0	7602.42	7711.23	6012.73	5965.82	6080.33	6090.93	6168.73	6518.88	7	15190.2	16250.7	15907.9	15207.7	13947.3	15511.4	13210.9	15032.3	7	0.433658	1.87859e-07	0
P32454	APE2	460	_SS[Phospho (STY)]HPIEVPVK_.2	6223.42					3374.67	3798.65	4465.58	3	3565.8			6930.75				5248.27	2	0.850866	0.882099	1	10082.4	5211.9	4956.95				6039.18	6572.62	4	7354.67		6527.32					6940.99	2	0.946927	0.944327	2
P32454	APE2	536	_S[Phospho (STY)]VMNIWTK_.2	6428.58	1378.9			2661.75	1913.17	2010.04	2878.49	5		3671.49		3998.59	3154.67	3744.42		3642.29	4	0.790296	0.788548	1	3027.73	3849.82	2738.08	3885.67	2484.83	3176.08	3709.43	3267.38	7	5240.76	4507.39	4457.57	3490.11		1758.16	2429.9	3647.32	6	0.89583	0.775429	1
P32454	APE2	569	_YLS[Phospho (STY)]TADVKPDEDK_.2	22137.1	19831.3	16488.3	16004.3	17406.6	16280.5	16631.3	17825.6	7	26670.6	13809.9	16079.1	19482.1	11889.5	15403.5	16182	17073.8	7	1.04403	0.899431	0		15792.3	18577.1	15909.2	14980.4	16198.5	19438.7	16816	6	18948.5	13423.6	22162	15099.7	17401.3	15507.4	20236.3	17539.8	7	0.958734	0.840339	-1
P37302	APE3	194	_DYAS[Phospho (STY)]VVPPR_.2	79817.1	46388.9	75339.3	39343	61276.8	54592.2	56111.1	58981.2	7	38366.8	92525.1	81062.3	96014.4	76449.3	82141.9	40244.9	72400.7	7	0.81465	0.581399	0	68102.3	85970.8	80744.1	73307.4	61590.5	85087.2	89330.2	77733.2	7	55089.6	104167	65634.2	110512	65425.4	62067	57099.4	74284.9	7	1.04642	0.89085	0
P53940	APJ1	166	_YNS[Phospho (STY)]NDEDHHLDR_.3	3135.72	7781.68				8510.2	7915.97	6835.9	4	6827.59	2878.26		6384.7	5831.29	2584.43	8918.79	5570.84	6	1.22708	0.765388	-2	2710.18	3682.14	4985.15			4988.02	8361.04	4945.31	5	11711.1		3900.52		8721.9	3033.08	12628.7	7999.07	5	0.618235	0.509613	0
P27351	APL1	652	_T[Phospho (STY)]AMMDDYDKPAEK_.2	12489.8	13697.4	9428.83	19920.4	11980.8	14969.5	11494.6	13425.9	7	13601.5	8624.06	11526.3		7423.13		10173.7	10269.7	5	1.30733	0.396558	2	11215.3	12152.9	12365.8		12932.8	10601.5	11328.9	11766.2	6	15880.4	17379.1	16125.9	13091.5	12277.8	19190.7		15657.6	6	0.751471	0.050611	0
P36000	APL2	623	_HIEELES[Phospho (STY)]MAK_.2	371.005	661.288				622.395	598.96	563.412	4	2696.1		333.844	378.761	502.996		651.214	912.583	5	0.617382	0.804631	-1	1640.55		306.691			403.561	748.373	774.794	4	3310.99							3310.99	1	0.234006	0.176461	3
P38065	APL3	699	_LGSLPASAGSTTLINTPSEASS[Phospho (STY)]STPDLLSK_.3		9632.22					8704.71	9168.46	2									0			2							8126.59	8126.59	1									0			1
P38065	APL3	700	_LGSLPASAGSTTLINTPSEASSS[Phospho (STY)]TPDLLSK_.3	9075.66		6856.99	8007.98	7479.74			7855.1	4	14168.8	14926.4	16405.9			13986.7	17028.4	15303.2	5	0.513296	0.00120938	-1	8540.34	8778.52	8435.33		8934.11	10017.8		8941.22	5	19156.9	19641.6	15535	13728.1		17751.1	19266.6	17513.2	6	0.510542	0.00070976	-1
P38065	APL3	714	_S[Phospho (STY)]IMVPMPPPSR_.2	21195.8	14625		18603.6	12293.5	10090.4	12622.7	14905.2	6	20276.7						14144.1	17210.4	2	0.866055	0.810857	4		12770.4	14168.8		13701.1	12420.3	8161.45	12244.4	5	17196.1	15642.8	13158.4	12583.1	15660.8	16925.3	11697.8	14694.9	7	0.833243	0.335961	-2
P38065	APL3	723	_SIMVPMPPPS[Phospho (STY)]R_.2	79195.1	37095.6	30470.8	42984.5	24969	31415.9	39724.8	40836.5	7	70505.8	55361.3	43221.3	52632.2	36310.9	42713.4	39495.8	48605.8	7	0.840157	0.705055	0	75805.8	49307.6	62744.2	43606.7	47470.8	46039.2	40334.5	52187	7	100997	111254	112185	73239	64544.5	76365.8	76383.8	87852.6	7	0.594029	0.0189927	0
P38065	APL3	723	_SIM[Oxidation (M)]VPMPPPS[Phospho (STY)]R_.2	15164.3	16651.4	14367.5	12828.4	10555.4	11617.2	14522.1	13672.3	7	11715.9	24083.8	18364.7	24533.7	19912.5	22319.3	18645.7	19939.4	7	0.685695	0.0563118	0	23929.5	15030.2	32925	15070.2	18795.3	19870.7	20373.4	20856.3	7	18319.4	40995.8	44359.7	32114.2	34904.5	39257.7	28147.3	34014.1	7	0.613167	0.0589615	0
P38065	APL3	727	_RNT[Phospho (STY)]IDDVNSK_.2	2839.36	1432.92	1661.28	5905.94	1969.15		5967.06	3295.95	6	3604.31	6749.01	4234.23	1610.91	2530.45	6588.4	2699.05	4002.34	7	0.823506	0.820404	-1	3236.77	2133.9	3837.99	2865.42	5987.24	4464.53	2626.62	3593.21	7	2237.06	6837.8	8201.27	7451.55	2190.59	5140.73	1764.9	4831.98	7	0.74363	0.621118	0
P38065	APL3	736	_IS[Phospho (STY)]SSEDFSGK_.2		8426.3	9248.77	7922.85	9872.42	9647.41	8079.71	8866.24	6	4156.34	9788.31	9257.16	9563.99	7350.66	8896.93	9003.25	8288.09	7	1.06976	0.806494	-1		10972.9	12496.9	11969.7	10966.7	12313.2	9547.62	11377.8	6		18336.1	18438.9	15484.3	14591.3	14991.9	16828.1	16445.1	6	0.691868	0.00205767	0
P38065	APL3	737	_ISS[Phospho (STY)]SEDFSGK_.2	2625.86	2063.33						2344.59	2	4579.33	3097.33		3547.65	2401.02			3406.33	4	0.688305	0.561239	-2	2774.7					1953.09		2363.9	2	4140.17	3675.83	4454.08	4536.28		4148.33		4190.94	5	0.56405	0.0286095	-3
Q08951	APL5	700	_FVDDS[Phospho (STY)]DTS[Phospho (STY)]YEEK_.2		173321	167372	257405	144533	110280	185564	173079	6	75867.6	231162	171886	149960	103171	210093	162769	157844	7	1.09652	0.849948	-1		168501	175833	186669	190792	169471	137739	171501	6	45630.1	202046	158309	193388	159438	144548	130527	147698	7	1.16116	0.62823	-1
Q08951	APL5	700	_FVDDS[Phospho (STY)]DTSYEEK_.2	97921	76368.4	78384.2	94863.8	76450.4	79012.5	70282.6	81897.5	7	63153.7	76012.6	63677.5	63045.2	54734.9	63798.3	73448.6	65410.1	7	1.25206	0.0511198	0	91036.5	66273.7	66801.6	67996.5	67675.6	65410.3	61397	69513	7	97840.8	101196	95727.7	98240.1	83276.8	89948.6	107739	96281.3	7	0.721979	0.00203774	0
Q08951	APL5	700	_FVDDS[Phospho (STY)]DT[Phospho (STY)]S[Phospho (STY)]YEEK_.2						25238		25238	1			9780.17	32999.2	32245.5	61255.1	31001.7	33456.3	5	0.754357	0.892424	-4	11142.3		11536.8	41574.6	48199.3		15171.7	25525	5	37842.8		71563.9		55486.8		51149.7	54010.8	4	0.47259	0.181774	1
Q08951	APL5	700	_FVDDS[Phospho (STY)]DT[Phospho (STY)]S[Phospho (STY)]YEEKEK_.2			2258.07		4015.67			3136.87	2									0			2			2198.48					2198.48	1	25990.6	3775.23			4084.65		21003.3	13713.5	4	0.160315	0.730198	-3
Q08951	APL5	700	_FVDDS[Phospho (STY)]DTS[Phospho (STY)]YEEKEK_.2									0									0			0									0	5865.87						2343.22	4104.54	2			-2
Q08951	APL5	702	_FVDDSDT[Phospho (STY)]SYEEK_.2									0									0			0									0							19356.8	19356.8	1			-1
Q08951	APL5	702	_FVDDS[Phospho (STY)]DT[Phospho (STY)]S[Phospho (STY)]YEEK_.2						25238		25238	1			9780.17	32999.2	32245.5	61255.1	31001.7	33456.3	5	0.754357	0.892424	-4	11142.3		11536.8	41574.6	48199.3		15171.7	25525	5	37842.8		71563.9		55486.8		51149.7	54010.8	4	0.47259	0.181774	1
Q08951	APL5	702	_FVDDS[Phospho (STY)]DT[Phospho (STY)]S[Phospho (STY)]YEEKEK_.2			2258.07		4015.67			3136.87	2									0			2			2198.48					2198.48	1	25990.6	3775.23			4084.65		21003.3	13713.5	4	0.160315	0.730198	-3
Q08951	APL5	703	_FVDDS[Phospho (STY)]DTS[Phospho (STY)]YEEK_.2		173321	167372	257405	144533	110280	185564	173079	6	75867.6	231162	171886	149960	103171	210093	162769	157844	7	1.09652	0.849948	-1		168501	175833	186669	190792	169471	137739	171501	6	45630.1	202046	158309	193388	159438	144548	130527	147698	7	1.16116	0.62823	-1
Q08951	APL5	703	_FVDDSDTS[Phospho (STY)]YEEK_.2			19257.7	24137.4				21697.6	2		21342.4	17384.8	17921.4		21594.3	21080.7	19864.7	5	1.09227	0.736456	-3			15777.6		18095.6	16692.7		16855.3	3			18368.4		17543.2	18810.1		18240.6	3	0.924056	0.429017	0
Q08951	APL5	703	_FVDDS[Phospho (STY)]DT[Phospho (STY)]S[Phospho (STY)]YEEK_.2						25238		25238	1			9780.17	32999.2	32245.5	61255.1	31001.7	33456.3	5	0.754357	0.892424	-4	11142.3		11536.8	41574.6	48199.3		15171.7	25525	5	37842.8		71563.9		55486.8		51149.7	54010.8	4	0.47259	0.181774	1
Q08951	APL5	703	_FVDDS[Phospho (STY)]DT[Phospho (STY)]S[Phospho (STY)]YEEKEK_.2			2258.07		4015.67			3136.87	2									0			2			2198.48					2198.48	1	25990.6	3775.23			4084.65		21003.3	13713.5	4	0.160315	0.730198	-3
Q08951	APL5	703	_FVDDS[Phospho (STY)]DTS[Phospho (STY)]YEEKEK_.2									0									0			0									0	5865.87						2343.22	4104.54	2			-2
Q08951	APL5	727	_MS[Phospho (STY)]NPYYLGEEDEER_.2	54355.9	27223.8	35019.9	29604.5	30973.2	28799.1	27557	33361.9	7	43495.4	32531.7	30335.6	29040.5	26504.7	30654.2	27265.6	31404	7	1.06235	0.86968	0	37743.4	31860.7	31297.1	31513.5	30065.8	29138.5	27231.8	31264.4	7	39795.1	36971.7	31775.3	32693.9	31466.7	30091.4	33210.7	33715	7	0.927315	0.506863	0
Q08951	APL5	727	_M[Oxidation (M)]S[Phospho (STY)]NPYYLGEEDEER_.2		5300.37		6519.15	5560.08		4838.53	5554.53	4				4633.02	4919.15		6916.6	5489.59	3	1.01183	0.979107	1		4151.09	4239.97		4300.44		4405.96	4274.37	4				5894.18	5532.57	4985.15	3845.15	5064.26	4	0.844026	0.40181	0
Q08951	APL5	755	_DLLDLNEEESS[Phospho (STY)]DKKPETIR_.3		61088.3					40036.8	50562.6	2	54021.7				29958		36127.5	40035.7	3	1.26294	0.767491	-1	46172.4	22242	39252.4		19090.5	25519.4	54004.7	34380.2	6	59866.7		19730.5	16103.4	47873.5		47803.5	38275.5	5	0.89823	0.883155	1
Q08951	APL5	770	_TDNS[Phospho (STY)]LNS[Phospho (STY)]LSLSTTEISR_.2	86619	87430.9	89195.4	95489	85229.2		80494.6	87409.7	6	86822	76591.3	79089.2	83154.7		78093	91421.8	82528.7	6	1.05914	0.475003	0	57065.7			91879.7	80274.1	82356		77893.9	4	71988.2	85472.1		71713.4	77310.1	84439.5	67085.3	76334.8	6	1.02042	0.935425	-2
Q08951	APL5	770	_TDNS[Phospho (STY)]LNSLSLSTTEISR_.2				9990.13	14075.8	19469.8	10335.8	13467.9	4	2859.46	19576.6	24999.8	22047		18055.4	10522.1	16343.4	6	0.824056	0.818553	-2	5270.92	8890.32		16648.2		7045.02	12696.1	10110.1	5			4739.39	9166.51	17064.9			10323.6	3	0.97932	0.983681	2
Q08951	APL5	773	_TDNS[Phospho (STY)]LNS[Phospho (STY)]LSLSTTEISR_.2	86619	87430.9	89195.4	95489	85229.2		80494.6	87409.7	6	86822	76591.3	79089.2	83154.7		78093	91421.8	82528.7	6	1.05914	0.475003	0	57065.7			91879.7	80274.1	82356		77893.9	4	71988.2	85472.1		71713.4	77310.1	84439.5	67085.3	76334.8	6	1.02042	0.935425	-2
Q08951	APL5	773	_TDNSLNS[Phospho (STY)]LSLSTTEISR_.2		2476.09		1462.84		3072.24	2960.48	2492.91	4		3449.98	3240.32	3312.42	3147.86	2790.52	2799.07	3123.36	6	0.798151	0.358865	-2		3054.98	3400.59		3357.32	3514.06	3949.2	3455.23	5			2331.66		2970.48	2690.25		2664.13	3	1.29695	0.101835	2
Q08951	APL5	777	_TDNSLNSLSLS[Phospho (STY)]TTEISR_.2					5045.24			5045.24	1									0			1	3391.74							3391.74	1				3562.65			2794.39	3178.52	2	1.06708	0.925027	-1
Q08951	APL5	798	_VQVLS[Phospho (STY)]DEPVIEAAPK_.2	162630	151095	167257	183952	151443	136759	134571	155386	7	193905	148013	122244	130753	108990	143775	193168	148693	7	1.04502	0.866752	0	159168	138879	139137	143854	142135	138390	122114	140525	7	146794	179668	151963	148805	149211	161806	187126	160768	7	0.874089	0.115039	0
Q08951	APL5	857	_GS[Phospho (STY)]QEEGNLR_.2	505.001	448.547	1968.78	1341	1116.53	1888.09	10957.2	2603.59	7	3729.03	8095.33	8900.42	13726	4069.41	5615.03	14720.2	8407.91	7	0.30966	0.150372	0	680.782		1136.2	1200.02	3821.29	3540.66	1183.76	1927.12	6	306.333	484.051	2466.88	10221.6	14272.4	4117.25	188.77	4579.62	7	0.420803	0.598015	-1
Q08951	APL5	872	_KEDELELS[Phospho (STY)]R_.2	625.74	2714.55	2985.87	3662.82	2000.05	2457.04	2900.93	2478.14	7	1222.58	11233.3	7724.51	4314.68	5445.49	11214.7	6330.78	6783.73	7	0.365306	0.0929856	0	688.576	3130.97	2934.99	2188.15	2603.31	1858.74	1623.29	2146.86	7									0			7
Q08951	APL5	888	_DEKDNLS[Phospho (STY)]DTEEVIVIK_.2	7142.92	21133.8			10577.2	18140.9	13772.6	14153.5	5	12638.9		12801.6	15283.7	13190.3		10558.4	12894.6	5	1.09763	0.866147	0	9930.54	8896.23	7894.36			8230.89	15708.7	10132.1	5	9306.89	2597.91	3191.69		11620.9	5796.04	26458.5	9828.66	6	1.03088	0.980434	-1
Q08951	APL5	888	_DEKDNLS[Phospho (STY)]DTEEVIVIK_.3	4532.44	18033.8		6402.74	10241	15168.9	9917	10716	6	16015.5		9537	13990.2	9263.06	9846.81	8638.42	11215.2	6	0.955491	0.949406	0	7374.01	8155.96	6177.32	5369.55	5116.5	7681.49	15077.2	7850.29	7	7142.43			4090.61	10411.5	4289.28	21413.8	9469.51	5	0.829007	0.832059	2
Q08951	APL5	888	_DNLS[Phospho (STY)]DT[Phospho (STY)]EEVIVIK_.2	2356.57	1519.68	2527.89	3315.83	2690.71	3274.24	1671.7	2479.52	7	2469.62	4205.41	2569.9	3054.18	2360.44	3729.1	1509.08	2842.53	7	0.872292	0.748791	0	2051.54	3725.4	2231.81	2796.67	3966.89	3611.47	1995.87	2911.38	7	764.249	4663.06	4893.72	2906.78	1357.32	2709.23	2355.98	2807.19	7	1.03711	0.95602	0
Q08951	APL5	888	_DNLS[Phospho (STY)]DTEEVIVIK_.2	297520	345551	212334	253761	258668	316377	202891	269586	7	355254	159127	311538	294721	274184	283292	192830	267278	7	1.00864	0.98308	0	285703	219554	190548	308840	217405	209367	217419	235548	7	251083	239452	227158	166110	217111	199192	153027	207591	7	1.13468	0.53604	0
Q08951	APL5	888	_DNLS[Phospho (STY)]DTEEVIVIK_.3	5542.19				2947.09	3738.98		4076.08	3	5657.01			3523.45	3070.55	2981.4		3808.1	4	1.07037	0.930959	-1	5038.5						2400.44	3719.47	2	4579.74							4579.74	1	0.812158	0.912608	1
Q08951	APL5	890	_DNLS[Phospho (STY)]DT[Phospho (STY)]EEVIVIK_.2	2356.57	1519.68	2527.89	3315.83	2690.71	3274.24	1671.7	2479.52	7	2469.62	4205.41	2569.9	3054.18	2360.44	3729.1	1509.08	2842.53	7	0.872292	0.748791	0	2051.54	3725.4	2231.81	2796.67	3966.89	3611.47	1995.87	2911.38	7	764.249	4663.06	4893.72	2906.78	1357.32	2709.23	2355.98	2807.19	7	1.03711	0.95602	0
Q08951	APL5	918	_NS[Phospho (STY)]PEPNEFLR_.2	540732	433110	508631	531820	464466	469105	402828	478670	7	426456	504157	415290	445392	373344	466996	483245	444983	7	1.0757	0.56843	0	404439	440619	453595	472592	431360	441219	418554	437483	7	253972	496252	473248	476757	408951	453320	224951	398207	7	1.09863	0.689191	0
Q08951	APL5	918	_AKNS[Phospho (STY)]PEPNEFLR_.2	99344.1	350576	77823.9	90919	124053	288342	256498	183937	7	443249	64872.8	205042	183662	181698	172577	217093	209742	7	0.876967	0.882099	0	320767	102922	212120	36006.8	63265.7	132155	262767	161429	7	320276	24797.8	111921	53423.3	234477	96776.5	258498	157167	7	1.02712	0.980413	0
Q08951	APL5	918	_AKNS[Phospho (STY)]PEPNEFLR_.3	13877.9	45261.2	7762.81	15968.2	15574.2	33231.5	32460.8	23448.1	7	61285.3	12608.2	21601.3	25244.4	29490.8	20915.1	27284.8	28347.1	7	0.827178	0.817079	0	44222.6	9107.67	10216.2	5049.07	8973.52	11274.6	23318.2	16023.1	7	52963.7	5082.96		6100.15	37283.5	8614.35	57499.3	27924	6	0.573812	0.606871	1
P46682	APL6	10	_IAS[Phospho (STY)]ALDTAK_.2	602092	603771	702348	678282	651734	583605	543799	623662	7	407192	393267	406039	370815	347740	381356	502863	401325	7	1.55401	0.000241477	0	407657	485269	352212	465758	394793	397989	400061	414820	7	387340	396322	379883	447066	424706	398670	525515	422786	7	0.981157	0.908825	0
P46682	APL6	10	_IAS[Phospho (STY)]ALDTAK_.1	28016.4	7485	8615.76	7708.46	8888.48	7732.14	7525.93	10853.2	7	21069.5	5284.22	4293.59	4667.66	4892.71	3184.12	8283.48	7382.18	7	1.47018	0.712598	0	18730.2	6721.48	6071.41	4455.1	5044.66	5325.21	6544.39	7556.07	7	16924.5	4588.26		5375.16	5911.97	4683.8	8450.31	7655.67	6	0.986991	0.989101	1
P46682	APL6	209	_VIS[Phospho (STY)]C[Carbamidomethyl (C)]AVLAY[Phospho (STY)]K_.2	18206.4		3006.83		6153.24	45390.1	2580.82	15067.5	5	15584.3	44240.1			41635.5	654.191		25528.5	4	0.590221	0.765527	1	24894.4	51724.8	784.826	2621.18	63418.7	53628	53350.1	35774.6	7	18039.2			45946.4	1955.1	3227.41		17292	4	2.06885	0.574642	3
P46682	APL6	215	_VIS[Phospho (STY)]C[Carbamidomethyl (C)]AVLAY[Phospho (STY)]K_.2	18206.4		3006.83		6153.24	45390.1	2580.82	15067.5	5	15584.3	44240.1			41635.5	654.191		25528.5	4	0.590221	0.765527	1	24894.4	51724.8	784.826	2621.18	63418.7	53628	53350.1	35774.6	7	18039.2			45946.4	1955.1	3227.41		17292	4	2.06885	0.574642	3
P46682	APL6	698	_SFSSQS[Phospho (STY)]FITNNSAR_.2	35102.7	27938	31800.2	26822.9	29835.7	25366.1	25141.7	28858.2	7	31317.8	24009.9	20447.4	20094	22767.3	18677.9	27020.9	23476.4	7	1.22924	0.186393	0	34966.8	27160.1	23444.7	23311.7	22096.1	22750.7	24410.9	25448.7	7	30412.5	22888	20764.2	27242	25418	25488	26946.7	25594.2	7	0.994316	0.980546	0
P46682	APL6	726	_LTGINDGDSNS[Phospho (STY)]ISGK_.2	602067	478811	482392	602501	470140	460903	417208	502003	7	169710	366987	355912	373053	307853	388739	518785	354434	7	1.41635	0.0862773	0	537499	442130	431905	549866	480321	444727	395229	468811	7	556884	511605	462953	460894	469486	550103	491874	500543	7	0.936606	0.570603	0
P46682	APL6	726	_LTGINDGDSNS[Phospho (STY)]ISGK_.1	20324.5		6265.58		5185.42			10591.8	3	17950.2	5942.75			5214.87	5381.05		8622.23	4	1.22843	0.906969	-1	16380.2	7285.62	9835.41		6602.8	7944.74	5940.19	8998.17	6	16836.3	7240.67	7889.06	6762.51	6778.07	7363.65	6455.49	8475.11	7	1.06172	0.927359	-1
P46682	APL6	748	_LQS[Phospho (STY)]LDEFFSDIPER_.2	9982.24	12357.1	10764.4	12616.9	11486.5	13416.5	11693	11759.5	7	5270.39	8287.73	10292.5	7406.62	8594.43	6930.03	7930.47	7816.02	7	1.50454	0.00393931	0	8941.66	12699.6	12575.1	14579.2	14099.9	12862.5	13890	12806.9	7	11548.2	10623.4	5546.43	9172.34	11390.9	12408.2	13499.5	10598.4	7	1.20837	0.332595	0
P46682	APL6	754	_LQSLDEFFS[Phospho (STY)]DIPER_.2				5759.88			5065.68	5412.78	2			1068.54	2600.01			9206.31	4291.62	3	1.26124	0.914077	-1					4147.54		4133.01	4140.28	2	6857.36	4913.82			4757.91	7479.99	11312.6	7064.34	5	0.586081	0.51188	-3
P38700	APM2	352	_DEEKNS[Phospho (STY)]DDDAGLQAATDAR_.3	5580.67	14328.7	21897.6	17725.7	17429.2	16432.6	15576.5	15567.3	7	5421.05	21889.3	15841.3	13474.8	14022.1	16366.8	17524.6	14934.3	7	1.04239	0.939722	0	8475.23	15728	16806.8	16396.7	16783.6	15664.4	14187.6	14863.2	7	4886.73	20931.9	21971.3	18047.6	11963.7	18726.7	4764	14470.3	7	1.02715	0.961703	0
P38700	APM2	352	_DEEKNS[Phospho (STY)]DDDAGLQAATDAR_.2	2569.95		1286.84	326.224		1197.07		1345.02	4		2223.04					787.458	1505.25	2	0.893556	0.953341	2	3696.32	902.831		921.314			399.237	1479.93	4	1206.94	1980.59	2049.13	1388.72				1656.34	4	0.893489	0.935425	0
Q99186	APM4	179	_S[Phospho (STY)]SSFLGQGDSTSDFYDNNK_.2		16747						16747	1			16383.2					16383.2	1	1.02221		0									0	20969.7	16973.9	12994					16979.2	3			-3
Q99186	APM4	180	_RSS[Phospho (STY)]S[Phospho (STY)]FLGQGDSTSDFYDNNK_.3			2927.5			3069.8		2998.65	2		3278.32		3010.19	2365.13	1847.98	3067.61	2713.85	5	1.10495	0.821492	-3			4684.93		3517.49		4595.39	4265.94	3	7133.2							7133.2	1	0.59804	0.262385	2
Q99186	APM4	181	_SSS[Phospho (STY)]FLGQGDSTSDFYDNNK_.2		212870	262147	240674	243440	207946	191321	226399	6	180984	148690	158207	159277	133009	145577	148841	153512	7	1.4748	0.00191694	-1	221098	185948	183199	199989	191053		180891	193696	6		174812	166452	181366	167066	174900	139368	167328	6	1.15759	0.0858078	0
Q99186	APM4	181	_RSS[Phospho (STY)]S[Phospho (STY)]FLGQGDSTSDFYDNNK_.3			2927.5			3069.8		2998.65	2		3278.32		3010.19	2365.13	1847.98	3067.61	2713.85	5	1.10495	0.821492	-3			4684.93		3517.49		4595.39	4265.94	3	7133.2							7133.2	1	0.59804	0.262385	2
P22936	APN1	4	_PST[Phospho (STY)]PSFVR_.2	44874.3	24220.9	30416.2	29473	27890.1	22960	25900.6	29390.7	7	40393	28638.3	25657.6	26897	24290.9	26380.9	31777.3	29147.9	7	1.00833	0.983313	0		23353.6	22925.3	25684	24564.5	25585.6	25924.2	24672.9	6	42835.2	33262.1	33647.5	34035.2	32359.7	31038.3	34856.7	34576.4	7	0.713576	0.00176264	-1
P22936	APN1	297	_S[Phospho (STY)]ESELLEDK_.2					1548.35		5005.38	3276.86	2		3180.24	3699.59	3519.36	2432.36	3255.52	5956.15	3673.87	6	0.891938	0.915095	-4									0					3220.69			3220.69	1			-1
P49435	APT1	68	_IDYIVGLES[Phospho (STY)]R_.2	6422.29		5319.51		4441.21	4499.85	4746.26	5085.83	5	2718.37	8146.88	6238.65	7117.13	6106.35	6039.16	2959.53	5618.01	7	0.905272	0.844043	-2	11082.1	8809.62	8084.33	7039.07	6777.09	8855.06	9561.06	8601.19	7	5901.04	12032.7	14104.6	12738.5	7349.71	7939.61	5940.24	9429.49	7	0.912159	0.810491	0
P49435	APT1	109	_EYGS[Phospho (STY)]DLFEIQK_.2	14393.2	8515.99	13896.3	8644.62	11762.8	11171.5	11321.5	11386.6	7	8367.47	16340.8	13460.3	15823.1	12336.3	15263.1	8938.8	12932.8	7	0.880438	0.676403	0	17834.4	20105.8	19747	18018.7	17081.1	19220.8	19844.3	18836	7	13726.2	23244.9	22525.2	21172.5	16239.5	14590.3	10631.2	17447.1	7	1.07961	0.759723	0
P53943	AQR1	28	_EYT[Phospho (STY)]KPDGQTK_.2		4644.62		14551.3	9995.75		14086.6	10819.6	4	5401.74	15932		5012.83	5031.38	19696.8	6402.18	9579.5	6	1.12945	0.914077	-2	4407.69	17968.6	25203.3	19287.7	26027.5	26060.6	17292.9	19464	7		64183.4	33037.2	38424.4	17704.7	23057.5	11916.4	31387.3	6	0.620126	0.435986	1
P38115	ARA1	112	_S[Phospho (STY)]LNESLK_.2	12392.1	3921.04	10699.7	2882.35	9008.84	9181.91	7248.39	7904.91	7	1904.28	18996.4	14843.8	17706	13347	15239.8	3323.22	12194.4	7	0.648243	0.504249	0	15048.9	13354.2	12612.9	13798.4	10153	14057.2	14252	13325.2	7	8525.26	15196.5	16703.6	15553.1	9971.52	8513.33	4492.94	11279.5	7	1.18137	0.603324	0
P38115	ARA1	151	_GISGLVKT[Phospho (STY)]PVDDSGK_.2	3284.71	1783.58						2534.14	2	5939.87							5939.87	1	0.426633	0.589193	1	4395.82							4395.82	1	13916.6						16330.8	15123.7	2	0.290658	0.387703	-1
P38115	ARA1	151	_GISGLVKT[Phospho (STY)]PVDDSGK_.3									0									0			0	1721.49							1721.49	1	4529.61						6671.23	5600.42	2	0.307385	0.600964	-1
P38115	ARA1	293	_IS[Phospho (STY)]SSIEFASLTK_.2		3803.59						3803.59	1					2657.59			2657.59	1	1.43122		0							2510.01	2510.01	1									0			1
P38115	ARA1	294	_ISS[Phospho (STY)]SIEFASLTK_.2	46404.7	36981	44957.6	41235.9	38091.2	36528.7	35023.4	39888.9	7	27634	34641.3	29785	32906.1	27661.2	31096.9	28030.3	30250.7	7	1.31861	0.00743437	0	40605.7	37782.5	33406.3	35190.5	33917.7	32333	33994.5	35318.6	7	36678.4	40886.2	37714.1	35032.5	31811.6	35966.2	41602.7	37098.8	7	0.952014	0.628934	0
P38115	ARA1	295	_ISSS[Phospho (STY)]IEFASLTK_.2									0									0			0									0		3300.81						3300.81	1			-1
P40024	ARB1	43	_EAAAEES[Phospho (STY)]EVDAAAR_.2	2472.98	4499.37	5851.36	22875.6	10369.4	9996.99	37097.1	13309	7	7839.61	35032.1	34551.3	28999.2	14832.5	33058.1	26750.7	25866.2	7	0.514532	0.305281	0	4844.05	9421.69	4403.91	11282	24672.9	10326.2	7136.16	10298.1	7	3346.03	5529.37	15263.5	27811.2	40875.5	9754.48	5661.21	15463	7	0.665984	0.702403	0
P40024	ARB1	70	_VVT[Phospho (STY)]GVLSSLETSR_.2	2733.51	4671.04	3808.9	3721.18	3974.86	4375.68	3999.74	3897.84	7		3085.17			2026.76			2555.96	2	1.525	0.202334	5		4341.82	3886.21	3592.33	4084.33	3328.64	3610.23	3807.26	6			3757.38		3116.56	4015.65		3629.87	3	1.04887	0.799695	3
P40024	ARB1	74	_VVTGVLS[Phospho (STY)]SLETSR_.2	15852.5	15283.6	14324.9	18349.2	14966.9	15473.2	14369.8	15517.2	7	18611	9953.8	8947.41		7773.53		14472.7	11951.7	5	1.29832	0.326165	2	13754.1	14543.8	12779.9	16200	15321.4	14753.4	13655	14429.7	7	17694.4	20993.7	14482.7	13074.7	16590.5	19600.2	22089.4	17789.4	7	0.811139	0.15028	0
P40024	ARB1	75	_VVTGVLSS[Phospho (STY)]LETSR_.2	5671.6					5954.56		5813.08	2									0			2		7064.7		7253.64		7935.38		7417.91	3		9330.22				5637.97	4985.13	6651.11	3	1.11529	0.83157	0
P40024	ARB1	446	_IMTGELT[Phospho (STY)]PQSGR_.2	28237.9	17981.4	15705.8	21097.5	16315.6	16154	17633.2	19017.9	7	29446.7		6887.67				17596.3	17976.9	3	1.05791	0.945569	4	20133.4	14237.4	13512.4		18342.3	14190.2	13037.2	15575.5	6	27419.6	23726.1	15830.8	14973.2	18234.2	19808.6	26553.9	20935.2	7	0.743986	0.205724	-1
P40024	ARB1	449	_IMTGELTPQS[Phospho (STY)]GR_.2	4885.35	1816.96					1981.52	2894.61	3	2868.8						1320.08	2094.44	2	1.38204	0.849644	1	3043.73					2457.92		2750.83	2	2571.03	3034.13			2670.56	1879.31	2756.71	2582.35	5	1.06524	0.85774	-3
P40024	ARB1	464	_LGVYS[Phospho (STY)]QHS[Phospho (STY)]QDQLDLT[Phospho (STY)]K_.2									0									0			0		9587.35						9587.35	1									0			1
P40024	ARB1	467	_LGVYS[Phospho (STY)]QHS[Phospho (STY)]QDQLDLT[Phospho (STY)]K_.2									0									0			0		9587.35						9587.35	1									0			1
P40024	ARB1	474	_LGVYS[Phospho (STY)]QHS[Phospho (STY)]QDQLDLT[Phospho (STY)]K_.2									0									0			0		9587.35						9587.35	1									0			1
P40024	ARB1	476	_S[Phospho (STY)]ALEFVR_.2	26868.7	12668	26725	8058.42	23391.8	24588.4	20548.7	20407	7	6406.85	33558.4	28582.2	32365	30552.9	35320.3	9742.21	25218.3	7	0.809216	0.722458	0	27224.3	44409.3	32702.8	35426.2	28820.9	37822.2	44404.6	35830.1	7	21433.4	41846.1	53944.1	37304.2	31473.9	24288.4	19695.6	32855.1	7	1.09055	0.821764	0
P40024	ARB1	596	_WDGS[Phospho (STY)]ILQYK_.2	7914.05	3424.69	5685.44		4537.85	4421.16	4255.48	5039.78	6	1936.22	8020.06	7712.39	8097.62	5859.75	6255.85	1643.17	5646.44	7	0.892559	0.866813	-1	6065.94	9628.96	7564.11	7109.34	6579.53	7671.42	7889.94	7501.32	7	7972.92	11370	10238.7	9249.88	7155.76	3712.06	4982.85	7811.74	7	0.960263	0.918706	0
P46672	ARC1	10	_FES[Phospho (STY)]LIISK_.2	8143.24	4057.45	9066.25	2238.23	7599.05	5871.44	5942.29	6131.14	7	2015.22	15103.8	11811.2	13504.2	11380.7	11335.3	3078.49	9747	7	0.629028	0.420343	0	9781.29	14079.5	13085.4	11707.1	8459.88	12267.9	14864.4	12035.1	7	6536.79	15843.8	18516.3	15339.6	10030.1	6901.32	4737.78	11129.4	7	1.08138	0.874872	0
P46672	ARC1	14	_FESLIIS[Phospho (STY)]K_.2	10951	3801.83	11519.8		9489.36	7667.33	7668.58	8516.32	6		17953.5	14305.1	17386.6	14031	14442.2		15623.7	5	0.545091	0.0158894	1	13747.2	16753.7	14677.4	12893.3	9919.19	15692.8	16935.8	14374.2	7	9108.05	19303.4	21599.3	20015	13285.1	8731.42		15340.4	6	0.937016	0.875271	1
P46672	ARC1	33	_EQSAQAAQWES[Phospho (STY)]VLK_.2			284.816		395.684			340.25	2		194.055	769.217			258.525		407.266	3	0.835449	0.931502	-1	2051.73	2358.08	527.81	914.073	698.917	64.7941	1213.02	1118.35	7									0			7
P46672	ARC1	37	_S[Phospho (STY)]GQIQPHLDQLNLVLR_.3		204.765				226.27	517.336	316.124	3			1610.12	309.058	1157.5		169.298	811.495	4	0.389557	0.643259	-1	477.552	473.159	839.967		272.036	800.554	2105.16	828.072	6	231.838						758.871	495.355	2	1.67167	0.793336	4
P46672	ARC1	243	_T[Phospho (STY)]VC[Carbamidomethyl (C)]SGLVK_.2	36954.9	31099.7	39926.5	35708.2	33674.1	34577.7	33057.4	34999.8	7	26350.9	39021.8	33039.3	35605.9	31058.8	37664.8	35013.3	33965	7	1.03047	0.848054	0		37246	38156.9	37948	34772.7	35684.2	40222.5	37338.4	6	20116.6	43505.7	48266.8	49200.8	27630.7	42738.4	16722.8	35454.5	7	1.05313	0.900906	-1
P46672	ARC1	246	_TVC[Carbamidomethyl (C)]S[Phospho (STY)]GLVK_.2		3467.59		3652.2		4657.53		3925.77	3		5939.01	5188.98	5808.88	5179.55	5038.41	2644.93	4966.63	6	0.790431	0.564907	-3		6646.02			4746.42	5930.66	7087.53	6102.66	4	3730.93		8834.61	7711.25		4755.59	6078.86	6222.25	5	0.98078	0.970741	-1
P46672	ARC1	369	_VAS[Phospho (STY)]IANAQVR_.2	10909.2	4829.56	8263.06	3322.98	7257.75	8821.29	6955.71	7194.22	7	4140.22	9446.24	7537.95	9407.28	8164.49	8587.08	4728.56	7430.26	7	0.968233	0.953322	0	14565.5	10208	9078.75	12036.1	9492.49	12618	10778.3	11253.9	7	11607.7	15301.8	15911.8	13363.5	10066.6	8224.02	9507.44	11997.6	7	0.938013	0.820786	0
P40518	ARC15	17	_IDIDAFDPES[Phospho (STY)]GR_.2	8626.77	8305.29	10666.2	10350.6	9541.72	8987.12	8430.15	9272.55	7	7765.69	9981.77	8789.37	9894.19	7306.36	9762.87	9692.72	9027.57	7	1.02714	0.874925	0	7010.08	7800.46	7013.01	6617.15	7459.81	7224.81	7367.65	7213.28	7	4136.16	10293	7958.71	8241.36	7885.87	7965.88	8324.01	7829.28	7	0.921321	0.704411	0
P40518	ARC15	80	_S[Phospho (STY)]VLEALTQVR_.2	18865.2	9918.09	18459.5	6037.42	18418.2	16889.7	14879.2	14781.1	7	6123.51	27131.6	24913	25477.9	22562.2	23070.3	6100.04	19339.8	7	0.764281	0.627495	0	14502.8	24779	20664.7		16408.3	21234.8	24677.3	20377.8	6	15886.9			22613.9		12240.5	13499.5	16060.2	4	1.26884	0.459527	2
P53731	ARC35	143	_FIELS[Phospho (STY)]QQQPAPVEAEITGGEVAANGDNTLFTIK_.3							12085.7	12085.7	1					9246.45			9246.45	1	1.30706		0						4639.67		4639.67	1									0			1
P53731	ARC35	155	_FIELSQQQPAPVEAEIT[Phospho (STY)]GGEVAANGDNTLFTIK_.3							12188.7	12188.7	1									0			1									0									0			0
P25628	ARE1	31	_HSVT[Phospho (STY)]YDNVILPQESMEVSPR_.3									0									0			0									0							4964.77	4964.77	1			-1
P25628	ARE1	45	_HSVTYDNVILPQESMEVS[Phospho (STY)]PR_.3	1602.97	27895	2159.82	1893.49	5189.47	18369.5	16620.5	10533	7	6636.87			11076.3	11551.2	9578.58	10828.5	9934.31	5	1.06026	0.970347	2	11376.3	5163.89			2829.45	7070.74	32909.8	11870	5	9256.9				59314.3	5757.69	21769.1	24024.5	4	0.49408	0.672505	1
P53629	ARE2	175	_S[Phospho (STY)]SPDAVDSVGK_.2	868866	1.07144e+06	1.34538e+06	1.35683e+06	707987	690163	1.00038e+06	1.00586e+06	7	973303	978986	996343	1096859	909787	649681	1.33846e+06	991917	7	1.01406	0.973822	0	847163	1.01679e+06	1.09764e+06	1.18554e+06	1136766	1.01632e+06	981270	1.04021e+06	7	1.02243e+06	1.18112e+06	1.07127e+06	1.00312e+06	1.02586e+06	1186649	1.16335e+06	1.0934e+06	7	0.951356	0.647507	0
P53629	ARE2	175	_S[Phospho (STY)]SPDAVDSVGK_.1	53134.6	15068.7	21236.5	25274.5	20190.8	20963	21443.5	25330.2	7	68617.6	18518.3	15523.7	15731.2	14048.3	17660.2	31195.3	25899.2	7	0.978029	0.984742	0	43365.6	21450.6	27823.7	18747.8	20527.1	20742.1	23457.4	25159.2	7	74576.2	21749.6	26030.2	22156.1	22890.4	27118.3	24313.9	31262.1	7	0.804783	0.744787	0
P53629	ARE2	175	_KS[Phospho (STY)]S[Phospho (STY)]PDAVDSVGK_.2	3252.11	8223.76	9153.24	16837.4	7712.32	5525.08	11960.1	8952	7	3395.11	8964.43	5798.78	4722.77	4007.08	9873.47	7271.75	6290.49	7	1.4231	0.540091	0	5270.16	8469.56	10763.7	7962.48	11022.1	10266.5	7389.56	8734.88	7		8560.21	8164.23	11016.3	7253.3	8470.52	3671.2	7855.96	6	1.11188	0.768683	1
P53629	ARE2	175	_KS[Phospho (STY)]SPDAVDSVGK_.2	183724	96191.2	196556	213109	164794	126181	173665	164889	7	118098	143922	153928	116470	107585	111891	196996	135556	7	1.21639	0.499471	0	29581.9	131675	132581	75502.1	140285	116996	107077	104814	7	196376	137394	154571	155354	154583	144416	174847	159649	7	0.656529	0.0557547	0
P53629	ARE2	175	_KS[Phospho (STY)]SPDAVDSVGK_.1	4913.19							4913.19	1		1160.38			633.854	924.864		906.367	3	5.42075	0.0601141	-2		1106.81	1782.01		278.862	1422.9		1147.64	4	5911.58		1921.55	1913.4		1820.12	950.575	2503.45	5	0.458426	0.545487	-1
P53629	ARE2	176	_SS[Phospho (STY)]PDAVDSVGK_.2		29107.1	33175.1					31141.1	2		31453					22003.3	26728.1	2	1.16511	0.785321	0		30379.1		30475.2		29765.3	29896.9	30129.1	4		28293.6	30146.1	27208.5				28549.4	3	1.05533	0.320935	1
P53629	ARE2	176	_KS[Phospho (STY)]S[Phospho (STY)]PDAVDSVGK_.2	3252.11	8223.76	9153.24	16837.4	7712.32	5525.08	11960.1	8952	7	3395.11	8964.43	5798.78	4722.77	4007.08	9873.47	7271.75	6290.49	7	1.4231	0.540091	0	5270.16	8469.56	10763.7	7962.48	11022.1	10266.5	7389.56	8734.88	7		8560.21	8164.23	11016.3	7253.3	8470.52	3671.2	7855.96	6	1.11188	0.768683	1
P53629	ARE2	182	_SSPDAVDS[Phospho (STY)]VGK_.2		15085	16059.6	24048	11395.3	10562.6	15096.7	15374.5	6	5620.84	17257.4	12320.8	9757.46	6830.54	17981.2	14854	12088.9	7	1.27179	0.606148	-1		11855.2	11824.8	9316.58	11818.7	11070.6	8390.15	10712.7	6	828.934	13198.6	12208.9	15151.4	10832.6	12793.6	6682.43	10242.3	7	1.04592	0.935256	-1
P40994	ARF3	109	_EELYS[Phospho (STY)]IIGEK_.2	2096.35			2396.63	2806.38		2308.44	2401.95	4									0			4		2798.36	3062.07			2860.26	1834.07	2638.69	4		3467.12				2516.26		2991.69	2	0.882007	0.783942	2
Q01217	ARG5,6	358	_S[Phospho (STY)]SIGEFPSADALR_.2		237654	228791	267725		221792		238991	4		239147		230328	195581	238049		225776	4	1.05853	0.733018	0				267092				267092	1					279319			279319	1	0.956226		0
Q01217	ARG5,6	359	_SS[Phospho (STY)]IGEFPSADALR_.2									0									0			0									0							191772	191772	1			-1
Q04728	ARG7	5	_ISS[Phospho (STY)]TLLQR_.2	9693.72	8349.09	10997.2	8665.56	10014.4	9472.16	7328.22	9217.18	7									0			7	6238.41	6590.07	6473.01	6706.98	6783.13	7453.48	6208.66	6636.25	7									0			7
Q04728	ARG7	174	_S[Phospho (STY)]IC[Carbamidomethyl (C)]TTDTFPK_.2	9474.67		6632.58		5547.08	4869.75	6012.06	6507.23	5		8930.46	7866.35	10602.6	8595.98	8163.56		8831.79	5	0.736796	0.216859	0		9869.29	9867.13	6544.73	5642.63	9615	14129.5	9278.05	6		8065.05	12619.4	9640.28				10108.2	3	0.917871	0.874862	3
P07250	ARG82	95	_LS[Phospho (STY)]DSTDNLDSIPVK_.2	20800.5	16015	19542	21323.8	18635	15704.3	16345.5	18338	7	17686.2	18684.4	18196.1		12896.5	18690	19534	17614.5	6	1.04107	0.842286	1	20155.2	19041.8	18114.3	19126.7	16585.8	19801.6	16868.2	18527.7	7	13584.1	24254	23232.6	22302.3	18797.4	21032.3	20483.6	20526.6	7	0.902616	0.498404	0
P07250	ARG82	97	_LSDS[Phospho (STY)]TDNLDSIPVK_.2	73102.7	60418.5	73252.5	78156.5	64408.6	69151.8	55829.1	67759.9	7	119472	131306	110077	115872	98684.9	123080	112860	115907	7	0.584604	4.18744e-05	0	53871.3	56139.1	52640.5	56497.9	52400.9	51496.2	49374.7	53203	7	79346.9	94384.6	89259.5	87961.6	70742.9	79521.8	90968.6	84598	7	0.628892	2.93396e-05	0
P53111	ARI1	129	_VIVT[Phospho (STY)]SS[Phospho (STY)]TAALVT[Phospho (STY)]PTDM[Oxidation (M)]NK_.2									0									0			0									0					9700.87		11117.9	10409.4	2			-2
P53111	ARI1	131	_VIVT[Phospho (STY)]SS[Phospho (STY)]TAALVT[Phospho (STY)]PTDM[Oxidation (M)]NK_.2									0									0			0									0					9700.87		11117.9	10409.4	2			-2
P53111	ARI1	137	_VIVT[Phospho (STY)]SS[Phospho (STY)]TAALVT[Phospho (STY)]PTDM[Oxidation (M)]NK_.2									0									0			0									0					9700.87		11117.9	10409.4	2			-2
P53974	ARK1	478	_S[Phospho (STY)]LGSYSTR_.2	140684	106477	113050	127871	115155	108882	98193	115759	7	140572	87655.5	80021.5	89848.3	72879.9	109980	141109	103152	7	1.12222	0.667294	0	60202.9	73494	90875.1	77335.1	86618.7	77445.1	68517.9	76355.5	7	88980.9	92169.1	87870	80446	80267.1	127406	104889	94575.4	7	0.807351	0.165127	0
P53974	ARK1	478	_S[Phospho (STY)]LGSYSTR_.1	5931.38							5931.38	1									0			1									0									0			0
P53974	ARK1	478	_S[Phospho (STY)]LGSYS[Phospho (STY)]TR_.2		6030.51					5945.27	5987.89	2	7065.52				3514			5289.76	2	1.13198	0.905887	0									0	5072.59							5072.59	1			-1
P53974	ARK1	483	_SLGSYS[Phospho (STY)]TR_.2	12323.8		8133.09					10228.5	2									0			2					9255.21		10887.6	10071.4	2				14025.8			8448.82	11237.3	2	0.896248	0.892766	0
P53974	ARK1	483	_S[Phospho (STY)]LGSYS[Phospho (STY)]TR_.2		6030.51					5945.27	5987.89	2	7065.52				3514			5289.76	2	1.13198	0.905887	0									0	5072.59							5072.59	1			-1
P53974	ARK1	499	_ESLT[Phospho (STY)]SSSLPGTSFTPTSTK_.2									0				6690.88				6690.88	1			-1									0									0			0
P53974	ARK1	522	_HENS[Phospho (STY)]PFK_.2	2079.83		1033.53	246.885	1776.9	1.5064	1957.33	1182.66	6	4361.34	3111.59	233.446		449.021	1905.58	867.659	1821.44	6	0.649302	0.750255	0	930.771	185.666	72.3255		795.642	1045.14	660.69	615.04	6	2387.73	8426.47	5126.12	5033.21	446.079	2535.34	1490.31	3635.03	7	0.169198	0.129841	-1
P53974	ARK1	568	_LNS[Phospho (STY)]SEESFNAR_.2		2895.5						2895.5	1		6201.84			3749.55			4975.7	2	0.581928	0.799541	-1					2615.38			2615.38	1			3803.81			3730.65		3767.23	2	0.694244	0.181526	-1
P53974	ARK1	569	_LNSS[Phospho (STY)]EESFNAR_.2	4904.42				2612.89	3028.85		3515.38	3	5358.88			4630.23			5528.99	5172.7	3	0.679603	0.375104	0		2054.39				2140.49	2033.52	2076.14	3				3270.45	3278.38		3896.74	3481.86	3	0.596273	0.027069	0
P38731	ARN1	3	_M[Acetyl (Protein N-term)]ES[Phospho (STY)]VHS[Phospho (STY)]RDPVKEEK_.3	67124.6	31630.2	30830.2	27124.3	32870	28015.1	30974.6	35509.9	7	52698.7	20585.4	22409.8	21464.7	18515.4	19007.5	24195.2	25553.8	7	1.38961	0.527908	0	72879	30895.9	27730.1	25835.3	24125.9	25594.9	25821.2	33268.9	7	81973.1	23984	29597.9	25680.2	26380.1	28386.6	58179.3	39168.8	7	0.849374	0.823387	0
P38731	ARN1	3	_M[Acetyl (Protein N-term)]ES[Phospho (STY)]VHS[Phospho (STY)]RDPVKEEK_.2	23473.3	1945.81	1753.59	1186.65	2581.8	1841.91	2962.6	5106.53	7	23117.3	1563.29	1849.47	1101.3	1685.35	669.788	2562.83	4649.91	7	1.0982	0.974542	0	17944.5	3225.57	3310.71	2451.36	3045.43	2716.66	2350	5006.32	7	32477.1	2146.53	3531.66	2584.87	2706.4	3867.91	8295.52	7944.29	7	0.630179	0.796308	0
P38731	ARN1	3	_M[Acetyl (Protein N-term)]ES[Phospho (STY)]VHSR_.2	20119.4	13173.9	28494.1	16054.2	23806.5	24928	22939.8	21359.4	7	12744.7	38304.1	34167	38876.5	31310	33575.3	15413	29198.7	7	0.73152	0.404842	0	39698.8	36052.6	35586	40340.2	31168.5	34338.8	40750.6	36848	7	40908.2	52877	64846.9	55328.3	33835.7	34457.4	23364.7	43659.7	7	0.84398	0.570178	0
P38731	ARN1	3	_M[Acetyl (Protein N-term)]ES[Phospho (STY)]VHS[Phospho (STY)]R_.2	2191.45	1135.7	4610.41	4187.17	10239.5	4581.33	17948.8	6413.48	7	9335.09	8242.39	13183.5	7318.18	6041.06	13111.6	9852.71	9583.5	7	0.669221	0.57457	0	5006.43	7016.61	2030.17	11338.4	16657.3	6281.76	9618.3	8278.43	7	5629.31	7477.68	15063.5	17279.4	24076.6	9398.11	18046.1	13853	7	0.597593	0.33749	0
P38731	ARN1	3	_M[Acetyl (Protein N-term)]ES[Phospho (STY)]VHS[Phospho (STY)]RDPVK_.2	164409	77342.9	98821	89142.5	85597.6	83897.4	79578.9	96969.8	7	130819	63993.5	63516.5	59897.8	55466.6	61098.7	71500.8	72327.5	7	1.34071	0.451697	0	153561	99969.6	82138.3	93096.7	83528.8	73704.9	72657.6	94093.8	7	126155	101288	91521.2	85830.1	83227	86875.5	102872	96824.1	7	0.971801	0.934277	0
P38731	ARN1	3	_M[Acetyl (Protein N-term)]ES[Phospho (STY)]VHS[Phospho (STY)]RDPVK_.3	12663.3	1895.33	1023.12	606.666	704.961			3378.68	5	10372.6						154.627	5263.59	2	0.641897	0.894528	3	9583.25	90.3205	608.535	230.517	267.377	168.76	563.111	1644.55	7	4831.51		566.789	770.66	504.604	238.467		1382.41	5	1.18963	0.957932	2
P38731	ARN1	6	_M[Acetyl (Protein N-term)]ES[Phospho (STY)]VHS[Phospho (STY)]RDPVKEEK_.3	67124.6	31630.2	30830.2	27124.3	32870	28015.1	30974.6	35509.9	7	52698.7	20585.4	22409.8	21464.7	18515.4	19007.5	24195.2	25553.8	7	1.38961	0.527908	0	72879	30895.9	27730.1	25835.3	24125.9	25594.9	25821.2	33268.9	7	81973.1	23984	29597.9	25680.2	26380.1	28386.6	58179.3	39168.8	7	0.849374	0.823387	0
P38731	ARN1	6	_M[Acetyl (Protein N-term)]ES[Phospho (STY)]VHS[Phospho (STY)]RDPVKEEK_.2	23473.3	1945.81	1753.59	1186.65	2581.8	1841.91	2962.6	5106.53	7	23117.3	1563.29	1849.47	1101.3	1685.35	669.788	2562.83	4649.91	7	1.0982	0.974542	0	17944.5	3225.57	3310.71	2451.36	3045.43	2716.66	2350	5006.32	7	32477.1	2146.53	3531.66	2584.87	2706.4	3867.91	8295.52	7944.29	7	0.630179	0.796308	0
P38731	ARN1	6	_M[Acetyl (Protein N-term)]ESVHS[Phospho (STY)]R_.2	37606.3	20994	33242.3	25161.5	32265.1	28317.7	27396.5	29283.3	7	25825.2	43617.1	35680.1	38625.8	32476.1	36531.3	25946.7	34100.3	7	0.858741	0.50324	0	61673.5	36879.5	45536.2	42356.6	37979.9	39354.4	41108.9	43555.6	7	19941.1	68511.9	64207	57007	44734.1	38748	22107.2	45036.6	7	0.967114	0.948005	0
P38731	ARN1	6	_M[Acetyl (Protein N-term)]ES[Phospho (STY)]VHS[Phospho (STY)]R_.2	2191.45	1135.7	4610.41	4187.17	10239.5	4581.33	17948.8	6413.48	7	9335.09	8242.39	13183.5	7318.18	6041.06	13111.6	9852.71	9583.5	7	0.669221	0.57457	0	5006.43	7016.61	2030.17	11338.4	16657.3	6281.76	9618.3	8278.43	7	5629.31	7477.68	15063.5	17279.4	24076.6	9398.11	18046.1	13853	7	0.597593	0.33749	0
P38731	ARN1	6	_M[Acetyl (Protein N-term)]ESVHS[Phospho (STY)]RDPVK_.2			4624.81	4717.64	3547.89	4936.91	4367.68	4438.99	5	11584.3			5842.43	4684.99		4825.21	6734.24	4	0.659166	0.499471	1	16349.9	6513.76				6088.72	7774.88	9181.83	4	11791.8	6108.92	10619.8	8513.43		6044.01	10806.5	8980.74	6	1.02239	0.976761	-2
P38731	ARN1	6	_M[Acetyl (Protein N-term)]ES[Phospho (STY)]VHS[Phospho (STY)]RDPVK_.2	164409	77342.9	98821	89142.5	85597.6	83897.4	79578.9	96969.8	7	130819	63993.5	63516.5	59897.8	55466.6	61098.7	71500.8	72327.5	7	1.34071	0.451697	0	153561	99969.6	82138.3	93096.7	83528.8	73704.9	72657.6	94093.8	7	126155	101288	91521.2	85830.1	83227	86875.5	102872	96824.1	7	0.971801	0.934277	0
P38731	ARN1	6	_M[Acetyl (Protein N-term)]ES[Phospho (STY)]VHS[Phospho (STY)]RDPVK_.3	12663.3	1895.33	1023.12	606.666	704.961			3378.68	5	10372.6						154.627	5263.59	2	0.641897	0.894528	3	9583.25	90.3205	608.535	230.517	267.377	168.76	563.111	1644.55	7	4831.51		566.789	770.66	504.604	238.467		1382.41	5	1.18963	0.957932	2
P38731	ARN1	6	_M[Acetyl (Protein N-term)]ESVHS[Phospho (STY)]RDPVKEEK_.3									0									0			0									0	5448.82						3654.1	4551.46	2			-2
P08566	ARO1	148	_T[Phospho (STY)]AIDTPLGK_.2	1454.64	1765.75			2195.8			1805.4	3		2280.14			1406.1			1843.12	2	0.979533	0.980313	1	2804.87	2154.99	2096.61				2714.08	2442.64	4		3395.13	7473.65	2127.03	1376.16		362.563	2946.91	5	0.828881	0.893577	-1
P08566	ARO1	152	_TAIDT[Phospho (STY)]PLGK_.2	3591.96	1799.05		2385.86	1970.18	2156.9	2441.97	2390.99	6	3546.82	2916.49	2466.14	2245.16	2575.24	2255.32	3858.97	2837.74	7	0.842569	0.591436	-1	4085.7			3175.26		2542.65	2176.56	2995.04	4	4739.78	3492.3	3954.96	4371.01	3663.68	3762.11	4835.45	4117.04	7	0.727474	0.132678	-3
P08566	ARO1	317	_YFGILS[Phospho (STY)]PTQVAR_.2	3758.98							3758.98	1							555.722	555.722	1	6.76414		0							1207.82	1207.82	1					1520.03	1706.98	2262.39	1829.8	3	0.660085	0.615038	-2
P08566	ARO1	541	_PIAPLVDS[Phospho (STY)]LR_.2	2610.87	207.886	1931.13		2041.72	1237.83	1187.27	1536.12	6		5291.73	2622.03	3353.85	3139.25	3669.58		3615.29	5	0.424895	0.0517763	1	5763.34	3456.26	2068.69	2700.71	1063.07	3624.31	3000.66	3096.72	7	2125.22	4223.01	6038.74	5163.31	2931.16	1683.62		3694.18	6	0.83827	0.779744	1
P08566	ARO1	827	_VAM[Oxidation (M)]SFS[Phospho (STY)]LLAGMVNS[Phospho (STY)]QNER_.3	29745.4	1679.44						15712.4	2									0			2	42468.4		36566					39517.2	2							35499.2	35499.2	1	1.11318	0.813921	1
P08566	ARO1	835	_VAM[Oxidation (M)]SFS[Phospho (STY)]LLAGMVNS[Phospho (STY)]QNER_.3	29745.4	1679.44						15712.4	2									0			2	42468.4		36566					39517.2	2							35499.2	35499.2	1	1.11318	0.813921	1
P08566	ARO1	1321	_S[Phospho (STY)]PILHNTGYEILGLPHK_.3		17870.8					5819.65	11845.2	2	3345.44						4484.47	3914.96	2	3.02563	0.675228	0	2441.27						15712.7	9076.99	2	3471.03				18070.5			10770.8	2	0.842742	0.956506	0
P28777	ARO2	12	_VTT[Phospho (STY)]YGESHC[Carbamidomethyl (C)]K_.2	112690	45834	49590.3	61151.8	46155.6	44620.9	47478.6	58217.3	7	41693.3	48563.4	31045.2	41545.5	37077.4	45260	39794.5	40711.3	7	1.43	0.372989	0	15118.9	48957	58457.3	40604.5	54937.5	57246.6	34966.8	44326.9	7	40597.4	57203.2	95757.4	67782.5	25838.9	88475.4	49521.7	60739.5	7	0.729788	0.464877	0
P28777	ARO2	16	_VTTYGES[Phospho (STY)]HC[Carbamidomethyl (C)]K_.2	5304.63	2733.63	2622	4250.15	2164.67	2888.04	2821.5	3254.94	7	1458.74	1705.23			1284.41	1725.78	1992.66	1633.36	5	1.99279	0.0907511	2		2428.31	2267.48	2960.1	2377.83	2759.63	1688.28	2413.6	6	1479.04	2617.94	3249.66	2830.45	627.194	4029.24	1846.35	2382.84	7	1.01291	0.981689	-1
P28777	ARO2	20	_S[Phospho (STY)]VGC[Carbamidomethyl (C)]IVDGVPPGMSLTEADIQPQLTR_.3									0									0			0						16275.6		16275.6	1									0			1
P28777	ARO2	67	_VEIQS[Phospho (STY)]GT[Phospho (STY)]EFGK_.2	3825.3	10647.1	12296.4	16413.1	11784.1	11190.8	12016.5	11167.6	7	6813.42	14332.7	10753.5	9376.45	7028.46	12106.9	13264.2	10525.1	7	1.06105	0.903916	0	4181.74	11541.5	13331.3	13508.7	11729.6	13258.6	10572.6	11160.6	7	7154.14	15747.9	14141.5	12076.6	9907.17	12689.3	4711.74	10918.3	7	1.02219	0.963906	0
P28777	ARO2	67	_VEIQS[Phospho (STY)]GTEFGK_.2		7129.57	7038.8	5689.72	6674.61	7143.16	6531.46	6701.22	6	5798.49	8126.6	6101.95	7630.58	6082.82	7404.96	6133.14	6754.08	7	0.992174	0.971174	-1	9193.2	7799.34	8133.68	8471.1		8750.57	8773.43	8520.22	6		9760.33		10245.4	7469.96	7708.27	7211.85	8479.16	5	1.00484	0.980871	1
P28777	ARO2	69	_VEIQS[Phospho (STY)]GT[Phospho (STY)]EFGK_.2	3825.3	10647.1	12296.4	16413.1	11784.1	11190.8	12016.5	11167.6	7	6813.42	14332.7	10753.5	9376.45	7028.46	12106.9	13264.2	10525.1	7	1.06105	0.903916	0	4181.74	11541.5	13331.3	13508.7	11729.6	13258.6	10572.6	11160.6	7	7154.14	15747.9	14141.5	12076.6	9907.17	12689.3	4711.74	10918.3	7	1.02219	0.963906	0
P28777	ARO2	135	_VAS[Phospho (STY)]GAIAEK_.2	20972.9	13486	16036.3	16168.2	13955.8	15331.5	14079.2	15718.6	7	391.019	2522.72	2365.25	2759.24	1748.36	1554.57		1890.2	6	8.31584	9.70459e-06	1	24306.4	17683.2	18346	18483.8	17094.8	17046.1	16107	18438.2	7	2719.29	3573.81	3257.56	3288.96	1960.23	1610.24	1902.45	2616.08	7	7.04803	5.98249e-07	0
P28777	ARO2	135	_VAS[Phospho (STY)]GAIAEK_.1	2482.04	671.805		1152.85	751.799	1153.38	833.505	1174.23	6									0			6	3674.79	695.907	1062.87	917.948	1054.85	1071.06	1016.48	1356.27	7									0			7
P28777	ARO2	186	_VDS[Phospho (STY)]MGPIR_.2	8566.27		2181.34		1275.17	1298.54	1614.69	2987.2	5	1353.24	5535.93	4681.62	5537.84	4337.26	2811.81	363.564	3517.32	7	0.849283	0.904678	-2	11676.3	5233.65	4055.52	4193.81	3104.77	4736.85	4678.41	5382.75	7	4410.89	6384.55	8200.77	6362.8	3807.59	1543.74	1149.94	4551.47	7	1.18264	0.81634	0
P28777	ARO2	214	_DS[Phospho (STY)]IGGVVTC[Carbamidomethyl (C)]VVR_.2	4712.67	2296.03	4309.61		3481.88	3767.06	4315.29	3813.76	6		9235.7	6745.13	5682.97	7147.67	5592.82	1015.17	5903.24	6	0.646044	0.397275	0	1592.23	7068.56	6930.14	4714.98	4856.91	6125.51	7388.37	5525.25	7	5242.19	7179.64	8034.76	7371.46	2998.15	4943.07	3450.27	5602.79	7	0.986159	0.980413	0
P28777	ARO2	259	_GFEIGS[Phospho (STY)]GFQGVSVPGSK_.2	9923.04	6812.52				8648.14	7595.98	8244.92	4		15181		13606.2	10495.8	13300.6		13145.9	4	0.627186	0.0629104	0	8365.25			12771.5	10150.8		11520.1	10701.9	4	7524.56	14412.5	14494.8	13001.1	10485.4			11983.7	5	0.893039	0.761112	-1
P28777	ARO2	265	_GFEIGSGFQGVS[Phospho (STY)]VPGSK_.2				5169.29			7856.81	6513.05	2			12485.8					12485.8	1	0.521635	0.594102	1									0	4288.04							4288.04	1			-1
P28777	ARO2	312	_S[Phospho (STY)]VATISQEQK_.2	39496.8	12783.7	25260.1	10242.5	22623.1	19105.9		21585.3	6	15163.1	34580.8	27801.7	35720.4	27362.5	31345.6	11862.6	26262.4	7	0.821911	0.744699	-1	53253.1	30759.3	30198.2	29256.3	24120.6	30920.6	31437.2	32849.3	7	37386.1	34637.1	41823	38342.1	23829.4	21830.1	20451.4	31185.6	7	1.05335	0.896592	0
P28777	ARO2	315	_SVAT[Phospho (STY)]ISQEQK_.2	5467.46	3134.71	3236.27	3325.75		2885.52	2468.09	3419.63	6	3604.47	2520.91	1774.04	1783.65	2326.89	2699.51		2451.58	6	1.39487	0.361654	0	4974.79	2852.77	3058.99	2758.91	2876.08	2944.88	2748.3	3173.53	7	3561.33	3067.42	2908.42	3035.02		2847.93	3627.94	3174.68	6	0.999639	0.998967	1
P28777	ARO2	322	_T[Phospho (STY)]ATYDGEEGILAAK_.2		2124.99						2124.99	1									0			1									0									0			0
P28777	ARO2	343	_HDPAVT[Phospho (STY)]PR_.2	6185.81	5708.95	16631.2	10644.1	10573	4629.32	14884.3	9893.81	7	6121.44	13272.7		4588.91		6853.66	6566.6	7480.65	5	1.32259	0.697536	2	6527.63	8424.41	6509.64	9593.78	12538.3	10226.2	6771.45	8655.92	7		19669.2	11576.6	16185.3	5361.56	8466.59	4617.32	10979.4	6	0.788376	0.674345	1
P14843	ARO3	26	_GYDPLT[Phospho (STY)]PPDLLQHEFPISAK_.3			6601.68		7923.38		11626.9	8717.32	3		9805.75			8714.06			9259.9	2	0.941406	0.933264	1				5958.38	9021.28	8599.92	13173	9188.14	4	8833.47			10949.8		10619	13835.1	11059.3	4	0.830804	0.657593	0
P14843	ARO3	103	_AY[Phospho (STY)]LEKPR_.2	4216.02		1630.12			1273.66	1154.38	2068.54	4		1297.64	767.457	275.744	2245.85	1303.84		1178.11	5	1.75582	0.623838	-1	1330.56	2767.46			2235.89	2053.85	1363.13	1950.18	5			4563.77	2606.26			1694.14	2954.72	3	0.66002	0.523449	2
P14843	ARO3	177	_TTES[Phospho (STY)]QLHR_.2		7450.91	17779	10007.5	11306.7	6108.4	11893.8	10757.7	6	5173.02	17390.6	9296.14	8214.11	8664.7	18408	5960.32	10443.8	7	1.03005	0.971597	-1	2600.91	16986.6	22148.9	14492.9	16262.8	20695.7	12628.3	15116.6	7	6808.3	27275.9	25124.2	28104.5	8802.73	14832.9	4047.74	16428	7	0.92017	0.915928	0
P14843	ARO3	185	_ELAS[Phospho (STY)]GLSFPIGFK_.2	4680.79	1462.63			4036.42	2648.69	2776.31	3120.97	5		7510.59	8215.79	7346.02	6107.98	5047.66		6845.61	5	0.455908	0.0231433	0	5405.3	6631.03	5731.84		4266.82	5840	6860.23	5789.2	6	5071.25	7232.1	6550.6	6119.18	5651.91	2704.05	1811.59	5020.1	7	1.15321	0.712163	-1
P14843	ARO3	188	_ELASGLS[Phospho (STY)]FPIGFK_.2					3732.2	3581.62	3622.56	3645.46	3		6039.61	4523.3	4321.51	4901.23	3982.11	2651.17	4403.15	6	0.82792	0.64947	-3	2013	5553.56	4955.85	3927.38	4531.06	5114.96	6917.73	4716.22	7	3896.56	5749.57	4937.57	5449.71	5872.92	3512.74	3968.85	4769.7	7	0.988787	0.978864	0
P32449	ARO4	33	_ILGYDPLAS[Phospho (STY)]PALLQVQIPATPTSLETAK_.3		19909.1	29777.6	58125.1	28249.4	24933.8	23957.1	30825.3	6	24057		53684.1	22004.4	37601.1	15317.3	70498.3	37193.7	6	0.828779	0.823037	0	85231.1	26900.9	18612.9		26808.7		73645.3	46239.8	5		20942.8		32796.6	25187.9	12397.8	9219.23	20108.9	5	2.29947	0.360532	0
P32449	ARO4	103	_GDLS[Phospho (STY)]IIMR_.2	2791.12		2471.98		2754.31	1278.61	1897.63	2238.73	5		5529.55	4693.74	5429.64	4741.5	3132.03		4705.29	5	0.47579	0.0210535	0	5096.36	5306.65	4554.98	3599.81	3410.5	5162.36	6711.46	4834.59	7	3418.64	8006.72	8178.87	7172.41	4408.35	2303.21	1645.53	5019.1	7	0.963237	0.953495	0
P32449	ARO4	192	_ELAS[Phospho (STY)]GLSFPVGFK_.2	23289.8	12937.9	26741.7	7507.44	22125.3	19806.5	21043.5	19064.6	7	6286.48	45817.2	40560.5	44713.2	37182.2	33788.4	8108.66	30922.4	7	0.616531	0.401967	0	34196.2	46824.2	37886.5	37383	31366.7	38952.3	48589.8	39314.1	7	20134.1	51365.1	50705.8	45619.8	37392.6	22980.7	16112.6	34901.5	7	1.12643	0.764438	0
P32449	ARO4	195	_ELASGLS[Phospho (STY)]FPVGFK_.2	29897.2	10688.1	21330.2	18700.2	13498.2	11542.3	12836.2	16927.5	7	21929.8	27068.2	17924.8	22263.3	15214.4	20832	17503.5	20390.9	7	0.830151	0.62973	0	24917	25188.6	22503.4	20585.4	15945	16757.8	22529.3	21203.8	7	19638.8	37253.4	33516	36534.8	19956.2	23486.5	32678.7	29009.2	7	0.730933	0.173746	0
P32178	ARO7	79	_FES[Phospho (STY)]PDETPFFPDK_.2	16011.6	10803.7			9305.32			12040.2	3	12804.3		9700.17	12986.2	8637.62	11025.4		11030.8	5	1.09151	0.849633	-2	20446.6		12034.4			9561.53		14014.2	3	9854.26	12877.3	13602.5	11187.5	10253.6	11259.7		11505.8	6	1.21801	0.634557	-3
P53090	ARO8	90	_S[Phospho (STY)]ANPSNDIPLSR_.2	80334.4	46220.9	73793.3	29388.5	59725.7	55084.8	37259.4	54543.9	7	32979.9	88546.4	88215.8	94504.5	79091.9	77540	32511.8	70484.3	7	0.773844	0.572314	0	79533.9	90357.4	70964.3	79873.9	54313.1	71280.6	84078.9	75771.7	7	48793.5	82831.1	82987.7	75760.5	50184	44434.5	24852.6	58549.1	7	1.29416	0.335629	0
P53090	ARO8	94	_SANPS[Phospho (STY)]NDIPLSR_.2	7411.04	4776.91	7904.57	4577.81	7152.18	5434.2	3201.54	5779.75	7	5919.4	7645.32	8612.12	8199.34	7461.15	7534.72	5854.48	7318.08	7	0.789791	0.317425	0	9008.81	7967.46	6457.44	6547.55	7810.7	9003.3	8415.56	7887.26	7	8043.77	10003.8	10495.7	10234.6	5535.17			8862.6	5	0.889948	0.627884	2
P53090	ARO8	100	_SANPSNDIPLS[Phospho (STY)]R_.2	18378	9970.21	15595.8	9699.48	13784.1	11829.2	9878.26	12733.6	7	11567.1	18352.2	17912.3	18245.8	16822.6	18846.3	9636.31	15911.8	7	0.800259	0.425713	0	28030.7	20594.3	17825.9	18610.4	15796.2	19283.3	21016.4	20165.3	7	17489.3	20152.2	22223.4	21234.1	14004.9	12781.3	8629.1	16644.9	7	1.2115	0.464602	0
P53090	ARO8	283	_S[Phospho (STY)]LANTFLSLDTEGR_.2	13982.7	8883.57	10796.8	2289.44	13177.1	13317.1	11117.7	10509.2	7	3091.15	17130.5	22245.5	18103.8	19875.1	12409.5	3169.79	13717.9	7	0.766094	0.701886	0	13325	20158	15544.1	16882.4	14380.9	19212.7	22180.8	17383.4	7	15291.5	14959.2	14925.5	12766.3	13555.1	7428.21	8461.76	12483.9	7	1.39246	0.101515	0
P53090	ARO8	319	_LGWITGS[Phospho (STY)]SK_.2	18528.5							18528.5	1	5191.75		19347					12269.4	2	1.51014	0.890407	-1		25144.5	16332.2					20738.4	2		26293.1		22606.9	13399.5		14675.6	19243.8	4	1.07767	0.921916	-2
P53090	ARO8	320	_LGWITGSS[Phospho (STY)]K_.2						6001.7		6001.7	1		13203.7		10786.4				11995	2	0.500348	0.569858	-1							13840.9	13840.9	1	11143.2		17168.3					14155.8	2	0.97776	0.984891	-1
P53090	ARO8	442	_GVLVVPGS[Phospho (STY)]WFK_.2	8423.98	7857.37	11301.4	2351.83	11644.4	10585.2	10867.6	9004.54	7	1883.13	18711.8	20951.5	18732.5	22372.5	13338.2	3378.67	14195.5	7	0.634325	0.487675	0	11135	21710.3	15363.6	18185.1	14843.8	18861.6	24905.1	17857.8	7	9225.84	18126.1	14746.3	14771.5	12970.7	8453.09	9885.78	12597	7	1.41762	0.176816	0
P53090	ARO8	462	_EVS[Phospho (STY)]NPNIIFFR_.2	4089.83	1969.91	3764.78	2019.92	2954.76	2403.73	2622.77	2832.24	7	1963.69	4988.7	3438.38	5112.64	5580.1	3908.25	1413.06	3772.12	7	0.750836	0.544075	0	5370.18	6005.86	4883.53	3678.41	3857.81	3514.88	5550.38	4694.44	7	3840.43	4961.54	4679.05	5901.53	4704.84	2605.4	3282.61	4282.2	7	1.09627	0.761112	0
P53090	ARO8	477	_GTYAAVS[Phospho (STY)]PEK_.2	8823.47	5489.39	7519.35	5389.5	7150.45	6171.53	5365.39	6558.44	7	5470.75	7331.91	6387.44	7426.9	6384.6	7660.01	6756.56	6774.02	7	0.968175	0.898784	0	12012.9	7354.23	6161.45	8485.86	6144.38	7418.85	7042.46	7802.87	7	8474.26	7953.71	7256.6	8733.81	6583.18	7809.67	10422.4	8176.23	7	0.954336	0.871744	0
P53090	ARO8	499	_LGDTLYEEFGIS[Phospho (STY)]K_.2									0					4538.52			4538.52	1			-1		4009.97					5472.15	4741.06	2			1996.32					1996.32	1	2.3749	0.593264	1
Q04052	ARO80	806	_ESS[Phospho (STY)]LEGQDLTK_.2	15313.3	10044.1	12722.9	13276.8	12178.2	12184.6	11593.3	12473.3	7	11481.2	13661	12088.6	13074.4	10651.9	13069.6	12610.1	12376.7	7	1.00781	0.967121	0	18255.7	13202.9	12729.1	12614	12774	13521.6	12403.6	13643	7	11536.9	12302.9	12315.8	11707.4	9751.95	11912.7	11373.8	11557.4	7	1.18046	0.163783	0
P38840	ARO9	5	_TAGS[Phospho (STY)]APPVDYTSLK_.2	39351.3		32029.6	31523.9	25758.8	24948.4	23042.1	29442.3	6	29451.5	29958.9	23276.1	24933.1	18727.5	23551.4	25022.3	24988.7	7	1.17823	0.460171	-1	32551.7	28955.5	29239.8	29016.7	23194.5	28034.5	27273.5	28323.8	7	29436.2	30079.2	26664.2	26678.9	23857.3	28165.1	29989.4	27838.6	7	1.01743	0.892911	0
P53946	ARP5	7	_DAS[Phospho (STY)]LT[Phospho (STY)]PLK_.2	4527.66	5566.93	5607.86	7840.35	5326.83	5420.64	4951.81	5606.01	7	4298.46	10868	9217.5	9241.26	8236.38	8952.47	8184.26	8428.33	7	0.665139	0.0679988	0	4095.1	5464.69	5495.76	5332.14	4344.43	5019.68	3871.64	4803.35	7	3699.54	8487.26	7678.46	8075.9	5767.76	5979.63	4990.78	6382.76	7	0.752551	0.22121	0
P53946	ARP5	7	_DAS[Phospho (STY)]LTPLK_.2	45568.7	36904.7	47150.3	49425.4	42817.2	38499.9	39229.7	42799.4	7	32228.7	51712.5	49583.9	52824.1	37339.3	48421.7	43325.6	45062.3	7	0.949784	0.808042	0	38862.2	38352.2	36718.2	42487	37343.3	38882.5	39641.7	38898.1	7	29257.2	44482.5	43002.4	43334.6	38745.4	35430.9	40540.4	39256.2	7	0.990879	0.953288	0
P53946	ARP5	7	_DAS[Phospho (STY)]LTPLK_.1	8615.38							8615.38	1									0			1									0									0			0
P53946	ARP5	9	_DASLT[Phospho (STY)]PLK_.2	173592	159320	183394	182267	168774	152011	147578	166705	7	165406	193483	187984	193220	154722	189918	199713	183492	7	0.908514	0.308842	0	153887	130947	139938	142681	142494	131508	146536	141142	7	173956	218161	193641	216806	180996	197353	218992	199986	7	0.705756	0.000184464	0
P53946	ARP5	9	_DAS[Phospho (STY)]LT[Phospho (STY)]PLK_.2	4527.66	5566.93	5607.86	7840.35	5326.83	5420.64	4951.81	5606.01	7	4298.46	10868	9217.5	9241.26	8236.38	8952.47	8184.26	8428.33	7	0.665139	0.0679988	0	4095.1	5464.69	5495.76	5332.14	4344.43	5019.68	3871.64	4803.35	7	3699.54	8487.26	7678.46	8075.9	5767.76	5979.63	4990.78	6382.76	7	0.752551	0.22121	0
P53946	ARP5	24	_QT[Phospho (STY)]PEPFDEQSAY[Phospho (STY)]NPQS[Phospho (STY)]PIAIDFGS[Phospho (STY)]S[Phospho (STY)]K_.4									0				3981.84			4705.15	4343.49	2			-2						6913.73		6913.73	1							2526.45	2526.45	1	2.73654		0
P53946	ARP5	34	_QT[Phospho (STY)]PEPFDEQSAY[Phospho (STY)]NPQS[Phospho (STY)]PIAIDFGS[Phospho (STY)]S[Phospho (STY)]K_.4									0				3981.84			4705.15	4343.49	2			-2						6913.73		6913.73	1							2526.45	2526.45	1	2.73654		0
P53946	ARP5	38	_QTPEPFDEQSAYNPQS[Phospho (STY)]PIAIDFGSSK_.3	15810.8		15677	14582.5				15356.8	3	15110.4	12601.6		14654.7	12004.4			13592.8	4	1.12977	0.437499	-1	14395.4	10728.5	12346.7			9300.01		11692.6	4	14006.7		14656.1	14728.6	12780.5	11874.3	17913	14326.5	6	0.816152	0.326368	-2
P53946	ARP5	38	_QT[Phospho (STY)]PEPFDEQSAY[Phospho (STY)]NPQS[Phospho (STY)]PIAIDFGS[Phospho (STY)]S[Phospho (STY)]K_.4									0				3981.84			4705.15	4343.49	2			-2						6913.73		6913.73	1							2526.45	2526.45	1	2.73654		0
P53946	ARP5	46	_QT[Phospho (STY)]PEPFDEQSAY[Phospho (STY)]NPQS[Phospho (STY)]PIAIDFGS[Phospho (STY)]S[Phospho (STY)]K_.4									0				3981.84			4705.15	4343.49	2			-2						6913.73		6913.73	1							2526.45	2526.45	1	2.73654		0
P53946	ARP5	47	_QT[Phospho (STY)]PEPFDEQSAY[Phospho (STY)]NPQS[Phospho (STY)]PIAIDFGS[Phospho (STY)]S[Phospho (STY)]K_.4									0				3981.84			4705.15	4343.49	2			-2						6913.73		6913.73	1							2526.45	2526.45	1	2.73654		0
P53946	ARP5	383	_AQMVEAEDDS[Phospho (STY)]HLDEMNEDK_.3	6293.83	4642.9	4149.87	2750.34	4662.9	4339.67	4301.33	4448.69	7	5065.38	4072.94	4587.04	5815.92	4250.99	4498.78	4190.69	4640.25	7	0.958718	0.884145	0	4815.95	3002.38	2727.77	2639.18	4241.05	3674.65	3533.76	3519.25	7	1655.66						1189.65	1422.65	2	2.47372	0.078325	5
Q12386	ARP8	65	_S[Phospho (STY)]VTGLSVDPR_.2	357006	351782	334013	362718	304772	298553	282688	327362	7	365020	292598	298021	309518	262281	333548	410819	324544	7	1.00868	0.970041	0	219453	265607	255100	281456	256210	250745	235577	252021	7	229961	344470	334140	312706	316954	369541	232812	305798	7	0.824143	0.162603	0
Q12386	ARP8	65	_S[Phospho (STY)]VTGLS[Phospho (STY)]VDPR_.2	4006.27		5849.57					4927.92	2	4739.99	4990.41	7824.97		6232.73	6502.67	6604.89	6149.28	6	0.801382	0.604495	-4		3775.12			4406.04	3391.57		3857.58	3	2466.73			5092.5		4534.56	2308.9	3600.67	4	1.07135	0.916145	-1
Q12386	ARP8	70	_S[Phospho (STY)]VTGLS[Phospho (STY)]VDPR_.2	4006.27		5849.57					4927.92	2	4739.99	4990.41	7824.97		6232.73	6502.67	6604.89	6149.28	6	0.801382	0.604495	-4		3775.12			4406.04	3391.57		3857.58	3	2466.73			5092.5		4534.56	2308.9	3600.67	4	1.07135	0.916145	-1
Q12386	ARP8	70	_SVTGLS[Phospho (STY)]VDPR_.2									0				4895.82				4895.82	1			-1	3659.83		3209.76					3434.8	2									0			2
Q12386	ARP8	320	_EQS[Phospho (STY)]EEFNNIK_.2	6867.82	4308.91	4196.86	4273.73	4930.06	4513.42	3230.21	4617.29	7	4615.21	4013.52	3222.55	3155.18	2698.48	3363.99	3561.52	3518.64	7	1.31224	0.237325	0	6711.47	5041.99	4395.12	3723.37	4392.13	3843.34	4743.51	4692.99	7	4460.09	4205.91	4643.89	4191.02	3610.96	3994.86	3456.5	4080.46	7	1.15011	0.456903	0
Q12386	ARP8	695	_PENYGNT[Phospho (STY)]LK_.2		4481.03	5182.65	4805.84	4459.57	4125.14	3123.28	4362.92	6		7671.01	6101.7	6318.76		6041.73	6841.04	6594.85	5	0.661565	0.00929111	1		4905.86	6592.52	5699.4	5453.32	5717.11	6043.35	5735.26	6		9849.42	7235.18	9566.37	7342.68	7435.68	6892.85	8053.7	6	0.712127	0.0260504	0
P53244	ART5	158	_SLS[Phospho (STY)]SPVFNK_.2	7180.61	133308	157233	144684	125356	129454	119510	116675	7	74214.2	77440.4	73023.5	76660.6	64091.3	2041.76	84633.7	64586.5	7	1.80649	0.203406	0	13035.4	110115	100097	128538	6703.72		117213	79283.5	6	71402.4	92778.8	84806.6	98891	78055.3	84841.5	114533	89329.8	7	0.887538	0.85258	-1
P53244	ART5	158	_SLS[Phospho (STY)]SPVFNK_.1	18018.9	3638.36	4950.39	2319.35	3860.37	4304.14	2893.7	5712.17	7							1908.5	1908.5	1	2.99301	0.817012	6	15967.7		4651.12		3366.35	3986.02	4444.31	6483.09	5	8477.14	4098.04	2065.07	2386.33	2702.25	2449.88		3696.45	6	1.75387	0.596364	-1
P53244	ART5	159	_SLSS[Phospho (STY)]PVFNK_.2	18325.3	18458.3	18524.9	16063.4	19501	13950.1	13129.4	16850.3	7	19347.3	19940.8	17633.6	20598	18534.8	22202.4	20872	19875.6	7	0.847791	0.135751	0	17274.9	17005	14285.7	15999.5	15196.4	16669.2	17460.5	16270.2	7	17271.5	23893.7	19065.7	22068.3	20706.1	18793.4	21379.6	20454	7	0.79545	0.0117874	0
P53244	ART5	203	_SSS[Phospho (STY)]SNTLNNNSHSYSNR_.2			2721.58					2721.58	1	8816.39							8816.39	1	0.308695		0	11435.8							11435.8	1	10964.7							10964.7	1	1.04296		0
P53244	ART5	203	_SSS[Phospho (STY)]SNTLNNNSHSYSNR_.3									0									0			0						2667.35		2667.35	1	9318.1							9318.1	1	0.286254		0
Q03862	ARX1	233	_S[Phospho (STY)]YNC[Carbamidomethyl (C)]GVVPGSR_.2	16343.9		8929.96		6392.64		6256.47	9480.73	4	4782.77	9764.4	8621.48	9442.27	8802.95	10427.3	2483.92	7760.73	7	1.22163	0.780069	-3	7231.55	14736.8	10785.1	12012.9	9118.89	13499.8	14033.2	11631.2	7	14452.5	12627	16843.5	13853.9	6502.46	7773.9	7354.24	11343.9	7	1.02532	0.956739	0
Q03862	ARX1	579	_S[Phospho (STY)]VETSNGGVEETMK_.2									0				3486.68				3486.68	1			-1						3485.92		3485.92	1	1341.31	3003.96			1869.12			2071.47	3	1.68283	0.602964	-2
Q03862	ARX1	582	_SVET[Phospho (STY)]SNGGVEETMK_.2									0									0			0		3149.05	3913.73					3531.39	2									0			2
Q03862	ARX1	582	_SVET[Phospho (STY)]SNGGVEETM[Oxidation (M)]K_.2									0									0			0									0		1698.77						1698.77	1			-1
Q03862	ARX1	583	_SVETS[Phospho (STY)]NGGVEETMK_.2	6472.75	1126.11	2007.46				2170.59	2944.23	4	2658.01	3765.66					1833.48	2752.38	3	1.0697	0.970293	1	6572.72							6572.72	1									0			1
Q06822	ASA1	5	_GFS[Phospho (STY)]NEIILK_.2	1757.85	2528.7	1217.85	1734.44	2091.31	2146.21	2150.83	1946.74	7	840.603	1714.01	894.647	1282.16	1543.93	2281.64	2041.42	1514.06	7	1.28578	0.43447	0	2420.43	2016.09	1445.04	800.122	1339.3	516.106	2485.76	1574.69	7	1061.83	847.304	3058.1	2160.83	1463.82	2097.65	2909.4	1942.7	7	0.810567	0.714728	0
Q06822	ASA1	15	_TLT[Phospho (STY)]LSDFTLR_.2	7648.29	6472.82	5743.86	5377.9	5591.27	6220.46	6584.96	6234.22	7	3963.55	5862.02	6366.48	6623.02	5714.1	6850.12	4008.72	5626.86	7	1.10794	0.636202	0	5865.31	5960.2	6912.76	4584.99	6877.76	6473.11	6855.9	6218.58	7	7328.48	10240	7618.01	7236.19	6230.33	7891.48	7192.09	7676.66	7	0.810063	0.141099	0
P38011	ASC1	96	_LWDVAT[Phospho (STY)]GETYQR_.2									0									0			0									0							7794.67	7794.67	1			-1
P38011	ASC1	99	_LWDVATGET[Phospho (STY)]YQR_.2						6125.64	6115.12	6120.38	2		4294						4294	1	1.42533	0.038973	1			6534.27				4729.96	5632.12	2					6169.11	7378.4		6773.76	2	0.831461	0.705433	0
P38011	ASC1	100	_LWDVATGETY[Phospho (STY)]QR_.2			11410.6					11410.6	1									0			1		14734	13060.5			15004.7	12281.5	13770.2	4		18217.7			13658.3		10137.9	14004.6	3	0.98326	0.968981	1
P38011	ASC1	108	_S[Phospho (STY)]DVMSVDIDK_.2	146672	67672.2	120994	62710.6	99226.8	97489.5	84504.2	97038.5	7	63117.1	158572	146807	152361	120298	136720	49736.9	118230	7	0.820759	0.66778	0	161644	178642	168954	180417	141116	169390	162913	166154	7	76942.3	229068	229813	191192	129903	110653	50578.8	145450	7	1.14234	0.753866	0
P38011	ASC1	108	_S[Phospho (STY)]DVMSVDIDKK_.2	60383.2	24740.5	26510.1	12156.1	26186.1	28496.3	25329.3	29114.5	7	36397.4	27741	40754.9	46948.8	37143.4	35712.5	13362.7	34008.7	7	0.856091	0.792294	0	93159.8	45912.1	48812.8	35379.7	33809.3	41347.5	59460.7	51126	7	93780.6	32280.2	50664.7	40350.9	37421.4	25635.3	14759.4	42127.5	7	1.2136	0.760472	0
P38011	ASC1	108	_S[Phospho (STY)]DVM[Oxidation (M)]SVDIDKK_.2	6103.64	1367.3	2924.83		3239.95	1955.71	2260.15	2975.26	6	2810.81	2693.39	3231.97	4359.08	3203.84	3090.99	1094	2926.3	7	1.01673	0.98439	-1	12473.8	4307.91	4350.33	2385.67	2808.64	4331.36	4745.6	5057.62	7	7463.7	2826.46	4611.1	3746.76	3135.36	2520.42	917.055	3602.98	7	1.40373	0.663426	0
P38011	ASC1	108	_S[Phospho (STY)]DVM[Oxidation (M)]SVDIDK_.2	6629.61	3022.14	5274.46		5379.96	4475.92	3076.79	4643.15	6	1975.72	6814.4	6034.43	6522.98	5555.33	6582.67		5580.92	6	0.831968	0.694575	0	10914.2	5952.16	6923.4	6674.53	5491.12	130.068	6442.42	6075.41	7	2752.69	6209.53	8421.03	3948.6	4817.48			5229.87	5	1.16168	0.837716	2
P38011	ASC1	112	_SDVMS[Phospho (STY)]VDIDK_.2	14597.2	5225.88	12575.7		9578.79	10074.6	8176.35	10038.1	6	4161.68	20253.5	17326.3	19010	14467.9	17650.9		15478.4	6	0.648524	0.333886	0	16892.9	20852.6	21303.3	22686.9	18004.4	21068.4	21714.2	20360.4	7	9599.08	28840.4	30740.3	24686.4	15684.8	10224.5	5265.65	17863	7	1.13981	0.793336	0
P38011	ASC1	112	_SDVMS[Phospho (STY)]VDIDKK_.2	3129.33							3129.33	1	2164.68							2164.68	1	1.44563		0	7636.04		2955.37					5295.7	2	5819		2835.12					4327.06	2	1.22386	0.907735	0
P38011	ASC1	112	_SDVM[Oxidation (M)]S[Phospho (STY)]VDIDK_.2									0			701.789		825.944	1114		880.578	3			-3	2045.66	1839.28	160.08		438.942	1211.63	1401.83	1182.9	6	525.576	712.553	1174.62	2781.04	1519.56			1342.67	5	0.88101	0.905045	1
P38011	ASC1	120	_AS[Phospho (STY)]MIISGSR_.2	362350	71029.2	145536	51085.5	118232	104058	125787	139725	7	110057	181300	147805	153156	171389	157858	52601.5	139167	7	1.00402	0.997778	0	507252	261673	212160	222454	173270	219843	259995	265235	7	411411	309674	390027	235421	178566	139875	193968	265563	7	0.998765	0.99817	0
P38011	ASC1	120	_AS[Phospho (STY)]M[Oxidation (M)]IISGSR_.2	13702.3	7562.87	12920.5	4710.43	17695.9	12771.3	14244.6	11944	7		15144.2	14179.1	14530.2	17419.6	17256.5	6046.34	14096	6	0.847333	0.725975	1		17845.9	17206.8	17465.3	11759.7	16867.6	24621.2	17627.7	6	15653.6	20582.1	26611.3	20311.4	16412.4	11998.6	16511.8	18297.3	7	0.963407	0.920072	-1
P38011	ASC1	120	_KAS[Phospho (STY)]MIISGSR_.2	1170.18	3770.85			884.951	3288.01	3738.81	2570.56	5	7146.51		2161.63	1590.95	2353.2		3697.46	3389.95	5	0.758289	0.8011	0	9888.77	1422.33	3653.88		1153.09	2321.4	3786.75	3704.37	6	9639.04			697.58	6560.84		4906.35	5450.95	4	0.679582	0.741705	2
P38011	ASC1	124	_ASMIIS[Phospho (STY)]GSR_.2	151366	37413.5	96211.1	24910.3	80163.5	60039	77826.4	75418.5	7	43162.9	84889.5	75217.9	67578.2	111518	102136	27690.5	73170.3	7	1.03073	0.971913	0	241488	170153	109674	142970	105999	122906	171023	152031	7	176961	164453	251279	116823	102093	84804.6	102994	142772	7	1.06485	0.903357	0
P38011	ASC1	124	_ASM[Oxidation (M)]IIS[Phospho (STY)]GSR_.2									0						14049.4		14049.4	1			-1			8264.72		9580.58		18712.4	12185.9	3	12219.7				13007.4	11336.7	14836.5	12850.1	4	0.948315	0.935256	-1
P38011	ASC1	126	_ASMIISGS[Phospho (STY)]R_.2	81933							81933	1	20786.2	41349.4	33297.2		53310.8			37185.9	4	2.20334	0.296279	-3	131748	74413.5	50200.5	58346.8	45961	51358.4		68671.3	6	103527	74909.6	108359	52410.6	45526		38876.9	70601.4	6	0.972662	0.969609	0
P38011	ASC1	126	_ASM[Oxidation (M)]IISGS[Phospho (STY)]R_.2	19550.7	11063	22230.8	4122.48	16019.7	12161	13799.5	14135.3	7		17691.2	12780.3	15073.3	23516.8	22126.4	7328.06	16419.4	6	0.860894	0.799844	1		28833.2	18095.3	26191.1	15517.7	27652.5	37471.8	25626.9	6	19939.3		39256.2	24505.5		13700.3	13262.8	22132.8	5	1.15787	0.799354	1
P38011	ASC1	152	_GQC[Carbamidomethyl (C)]LATLLGHNDWVS[Phospho (STY)]QVR_.3		7120.95			2140.09	5947.97	10028.4	6309.34	4		5110.75	10874.1	5949.7	8261.76	2400.08	409.659	5501	6	1.14694	0.908317	-2		6216.49	7041.78	1420.35	3688.05	8447.86	25123.4	8656.33	6	5051.58	537.079		2449.24	9961.02	1598.94	5432.29	4171.69	6	2.07502	0.573783	0
P38011	ASC1	166	_ADDDS[Phospho (STY)]VTIISAGNDK_.2	875124	603304	763105	815606	665534	654975	532066	701388	7	772462	692015	621314	661892	514065	659290	588560	644228	7	1.08873	0.676403	0	998185	780870	722822	828457	724496	705376	696174	779483	7	741614	794547	802879	736424	545995	690288	675102	712407	7	1.09415	0.539708	0
P38011	ASC1	168	_ADDDSVT[Phospho (STY)]IISAGNDK_.2	882921		308436	333468				508275	3	54695.2			279035	213543	264736		203002	4	2.50379	0.446687	-1	1.00163e+06		732599			267826		667352	3									0			3
P38011	ASC1	171	_ADDDSVTIIS[Phospho (STY)]AGNDK_.2	42750.2		30220.8	14496.9		23134.5		27650.6	4	14382.6	46707.8	33434.7	39288.8	27762.7	38092.8	10292.9	29994.6	7	0.921852	0.92478	-3	67900	50747.3	42095	43607.2	35499.5	43190.3	49508.2	47506.8	7	28700.2	50523.3	65162.9	50121.9	30143.1	25804.7		41742.7	6	1.13809	0.738331	1
P38011	ASC1	250	_Y[Phospho (STY)]WLAAATATGIK_.2	6441.24	6571.48	7389.51	2146.66	7744.07	7132.81	10053.8	6782.8	7	1565.65	5582.13	6977.99	4885.2	7828.35	4676.45	4134.18	5092.85	7	1.33183	0.523797	0	2097.16	9838.3	9022.84	6730.69	9395.75	9169.77	9361.6	7945.16	7	11087.4	9391.5	8232.68	7199.33	8010.93	9603.84	14216.3	9677.43	7	0.820998	0.550098	0
P50275	ASE1	3	_M[Acetyl (Protein N-term)]ET[Phospho (STY)]ATSS[Phospho (STY)]PLPIK_.2									0		21531.3	17376	20745.2	14383	21781.3	14255.3	18345.4	6			-6			6886.9					6886.9	1		48637.1	45014.9	33581.4	34195.1	36232.3		39532.1	5	0.17421	0.0866729	-4
P50275	ASE1	6	_M[Acetyl (Protein N-term)]ETATS[Phospho (STY)]S[Phospho (STY)]PLPIK_.2	16204.1							16204.1	1	91666.4	64806	62201.7	68209.9	50645.5	66778.5		67384.7	6	0.240472	0.128838	-5	32898		20818.8		18002.4	11751.6		20867.7	4	75213.1	91749.9	89106.6	70713.3	66009.6	63953.2	18827.7	67939.1	7	0.307153	0.045301	-3
P50275	ASE1	7	_M[Acetyl (Protein N-term)]ETATS[Phospho (STY)]S[Phospho (STY)]PLPIK_.2	16204.1							16204.1	1	91666.4	64806	62201.7	68209.9	50645.5	66778.5		67384.7	6	0.240472	0.128838	-5	32898		20818.8		18002.4	11751.6		20867.7	4	75213.1	91749.9	89106.6	70713.3	66009.6	63953.2	18827.7	67939.1	7	0.307153	0.045301	-3
P50275	ASE1	7	_M[Acetyl (Protein N-term)]ETATSS[Phospho (STY)]PLPIK_.2	18172.4	9442.32					9469.58	12361.4	3	52586.6	31056	29712.8	32505.7	23245.5	30805.2	32791.4	33243.3	7	0.371847	0.0657977	-4	18118.7		13054.9		11405.6	10039.4		13154.7	4	68419.8	74553.8	68805	73947.6	52034.2	56830.3	43525.1	62588	7	0.210179	0.000606429	-3
P50275	ASE1	7	_M[Acetyl (Protein N-term)]ET[Phospho (STY)]ATSS[Phospho (STY)]PLPIK_.2									0		21531.3	17376	20745.2	14383	21781.3	14255.3	18345.4	6			-6			6886.9					6886.9	1		48637.1	45014.9	33581.4	34195.1	36232.3		39532.1	5	0.17421	0.0866729	-4
P50275	ASE1	55	_EFMKLT[Phospho (STY)]PVR_.2									0									0			0									0	5727.36							5727.36	1			-1
P50275	ASE1	64	_DFGS[Phospho (STY)]PLK_.2	106871	114165	117577	124711	116036	112389	104579	113761	7	312533	388014	365756	410225	309623	398410	411626	370884	7	0.30673	1.24868e-06	0	119473	120336	115065	133631	135829	123955	127134	125060	7	397292	563807	527466	543585	482124	508573	564635	512497	7	0.244021	1.53693e-07	0
P50275	ASE1	64	_DFGS[Phospho (STY)]PLK_.1	14011.7	5495.61	3565.98	3360.36	4085.93	4025.24	3246.48	5398.76	7	49994.6	13870.2	12248.6	13339.2	11998.6	13224.9	17139.7	18830.8	7	0.286698	0.188168	0	13455.2	4183.06	4609.37	3971.34	3934.21	4104.37	4034.55	5470.3	7	50150	20574.8	21165.9	18662	18943.4	18287.2	22534.2	24331.1	7	0.224828	0.0160303	0
P50275	ASE1	675	_VPIGLNLNDANITYKT[Phospho (STY)]PSK_.3									0	3800.99							3800.99	1			-1									0	8348.74						11377	9862.84	2			-2
P50275	ASE1	690	_NDLS[Phospho (STY)]QENSLAR_.2	3846.57	3924.12	4262.94	3637.05	286.314	6313.69	4578.79	3835.64	7	6367.92	6005.89	4989.26	6267.12	4931.57		4160.34	5453.68	6	0.703312	0.323921	1		4208.76	6097.28	3375.1	4560.44	4218.65	477.559	3822.97	6	4801.26	397.024	322.593		3155.32			2169.05	4	1.76251	0.55284	2
P50275	ASE1	694	_NDLSQENS[Phospho (STY)]LAR_.2	13069.9	6099.72	7925.01	6836.91	7710.76	7568.45	5214.82	7775.08	7	12967.9	10866.3	9415.75	9839.34	8826.62	11084.3	10383.2	10483.3	7	0.74166	0.182114	0	13499.7	8346.24	9463.71	7829.89	8382.06	9071.6	8442.49	9290.81	7	10747.6	11412.9	11693.3	9879.21	8746.68	10252.4	7720.7	10064.7	7	0.92311	0.711578	0
P50275	ASE1	745	_SSDLSSS[Phospho (STY)]PR_.2					684.857		2560.3	1622.58	2	10482.7	907.137	4799.72	3569.82	2816.66		4792.5	4561.42	6	0.355717	0.634128	-4					1382.48			1382.48	1		532.493	2446.6	8428.16	15966.1	4634.99	14998.2	7834.43	6	0.176461	0.703364	-5
P50275	ASE1	809	_KSS[Phospho (STY)]LEDYAQK_.2	15747.8	20809.4	9969.48	9390.55	13663.9	17165.1	17940.6	14955.3	7	4216.88				1859.41		2252.89	2776.39	3	5.38658	0.0210273	4	18540.8		11029		7185.06	11233.2	13646.7	12326.9	5	8083.44		2609.73				6008.23	5567.13	3	2.21423	0.226669	2
P50275	ASE1	819	_LSS[Phospho (STY)]PYKEPEHSIYK_.3									0	1204.3			1218.49				1211.39	2			-2									0	6941.19				14699.4		6333.74	9324.76	3			-3
P50275	ASE1	832	_LS[Phospho (STY)]MSPEGK_.2	9042.18	5579.32	6698.39	6519.44	6336.01	6915.5	6759.19	6835.72	7	5568.18		4779.07				5476.66	5274.64	3	1.29596	0.243119	4	7143.82	5969.83	6212.7	6069.76	5740.44	5407.28	4849.67	5913.36	7	11790.6	18537.8	17527.8	14604.7	13266	15248.4	16542.5	15359.7	7	0.384992	1.87087e-05	0
P50275	ASE1	832	_LS[Phospho (STY)]MS[Phospho (STY)]PEGK_.2	176.42	853.407	2856.57	3755.16	1922.23	884.284	3563.06	2001.59	7	308.838	6202.88	4288.71	3060.22	2948.02	5157.02	4345.23	3758.7	7	0.532521	0.327929	0		2913.03	3948.61	3068.67	3585.86	3203.59	2526.87	3207.77	6		13290.6	9401.12	10928.9	9878.53	9085.58	4417.53	9500.37	6	0.337647	0.00601852	0
P50275	ASE1	834	_LSMS[Phospho (STY)]PEGK_.2	18408.9		10670.3	9395.42	9285.64	8145.2	8764.3	10778.3	6	15301.7	14524.4	13352.4	13941.4	11864.8	14972.3	11837.1	13684.9	7	0.787606	0.361704	-1	25201.2	12088.3	14490.1	14290.6	13588.2	12115.7	12583.5	14908.2	7	14242.9	17223.9	17502	14034.3	11872.3	11997.7	12210.1	14154.7	7	1.05323	0.884077	0
P50275	ASE1	834	_LS[Phospho (STY)]MS[Phospho (STY)]PEGK_.2	176.42	853.407	2856.57	3755.16	1922.23	884.284	3563.06	2001.59	7	308.838	6202.88	4288.71	3060.22	2948.02	5157.02	4345.23	3758.7	7	0.532521	0.327929	0		2913.03	3948.61	3068.67	3585.86	3203.59	2526.87	3207.77	6		13290.6	9401.12	10928.9	9878.53	9085.58	4417.53	9500.37	6	0.337647	0.00601852	0
P32447	ASF1	264	_IEGGS[Phospho (STY)]TDIESTPK_.2	87060.9	62618.6	66423.8	70950.6	58961.7	61342.6	52528.6	65698.1	7	62213.4	67504	62472.7	62625.2	48080.5	58564.5	54112.7	59367.6	7	1.10663	0.570971	0	80140.9	60098.3	63771.8	70751.7	63027	61464.9	60731.6	65712.3	7		71069.2	55109.6	55661.3	53536.1	57106.2	35790.9	54712.2	6	1.20105	0.249883	1
P32447	ASF1	264	_KIEGGS[Phospho (STY)]TDIESTPK_.2	5720.02	5277.63	3511.15		3138.12	3609.03	3029.95	4047.65	6	6181.98			2409.18	2447.65	2442.57	4041.73	3504.62	5	1.15495	0.815123	1	6685.97		3594.5		3320.98		3352.65	4238.53	4	7344.1				2799.32		9731.76	6625.06	3	0.639772	0.594908	1
P32447	ASF1	264	_KIEGGS[Phospho (STY)]T[Phospho (STY)]DIESTPK_.2		3540.59	4282.26	3593.02	3368.22	2809.34	3282.27	3479.28	6	1326.05	4607.59	4152.44	2834.57	3024.05	4641.55	3649.3	3462.22	7	1.00493	0.993026	-1	1291.61	3658.35	3600.81	3509.2	3790.65	3271.35	2897.09	3145.58	7	4274.33	3786.94	4438.62	4524.77	2522.67	4000.66	5542.79	4155.82	7	0.756909	0.244858	0
P32447	ASF1	264	_IEGGS[Phospho (STY)]T[Phospho (STY)]DIESTPK_.2		6288.99	6884.91	11120	5332.39	4137.29	9860.54	7270.69	6		13417	10890.9	8363.53	4384.57	13308.3	8459.19	9803.92	6	0.74161	0.535027	0	7247.61	8145.47	8302.71	8414.37	12233.5	8641.98	6328.21	8473.41	7		9077.53	8814.79	11017.5	7878.46	6482.41	1728.95	7499.95	6	1.1298	0.775429	1
P32447	ASF1	265	_IEGGST[Phospho (STY)]DIESTPK_.2	199814	164666	183512	177196	172463	167332	152424	173915	7	156499	190005	175456	184874	150557	183227	172504	173303	7	1.00353	0.982174	0	251648	161281	163942	174287	162856	155034	157309	175194	7	118736	167299	160636	166640	140274	142355	95808.4	141678	7	1.23656	0.266741	0
P32447	ASF1	265	_KIEGGST[Phospho (STY)]DIESTPK_.2	18828		14158.6		13008.2			15331.6	3	24163.2			14116.1	12973.4		14827.8	16520.1	4	0.928057	0.909654	-1	21700.4							21700.4	1	26445.7			10148.8		8911.37	30555.4	19015.3	4	1.1412	0.941239	-3
P32447	ASF1	265	_IEGGST[Phospho (STY)]DIEST[Phospho (STY)]PK_.2			2585.72	10716.7	5395.5		13890.3	8147.08	4	7125.87	20844.5	14568.6	10123.1	4907.03	21597	9578.19	12677.7	7	0.642628	0.624444	-3		6054.7	4225.4	6174.35		7403.71	5747.18	5921.07	5		7171.19	10899.9	14728.3	18096.9		5166.61	11212.6	5	0.528074	0.259777	0
P32447	ASF1	265	_KIEGGST[Phospho (STY)]DIEST[Phospho (STY)]PK_.2			4658.3	7375.84			5126.07	5720.07	3		8775.68				6751.91	5127.25	6884.95	3	0.830808	0.758446	0	3500.1		5059.25		5455.5	5104.23		4779.77	4	3097.51	7897.9	7529.12	9361.37	5035.24	5925.33	5026.75	6267.6	7	0.762615	0.53638	-3
P32447	ASF1	265	_KIEGGS[Phospho (STY)]T[Phospho (STY)]DIESTPK_.2		3540.59	4282.26	3593.02	3368.22	2809.34	3282.27	3479.28	6	1326.05	4607.59	4152.44	2834.57	3024.05	4641.55	3649.3	3462.22	7	1.00493	0.993026	-1	1291.61	3658.35	3600.81	3509.2	3790.65	3271.35	2897.09	3145.58	7	4274.33	3786.94	4438.62	4524.77	2522.67	4000.66	5542.79	4155.82	7	0.756909	0.244858	0
P32447	ASF1	265	_IEGGS[Phospho (STY)]T[Phospho (STY)]DIESTPK_.2		6288.99	6884.91	11120	5332.39	4137.29	9860.54	7270.69	6		13417	10890.9	8363.53	4384.57	13308.3	8459.19	9803.92	6	0.74161	0.535027	0	7247.61	8145.47	8302.71	8414.37	12233.5	8641.98	6328.21	8473.41	7		9077.53	8814.79	11017.5	7878.46	6482.41	1728.95	7499.95	6	1.1298	0.775429	1
P32447	ASF1	269	_IEGGSTDIES[Phospho (STY)]TPK_.2									0				25525.4				25525.4	1			-1									0									0			0
P32447	ASF1	269	_IEGGSTDIES[Phospho (STY)]T[Phospho (STY)]PK_.2									0									0			0									0	246.604							246.604	1			-1
P32447	ASF1	269	_KIEGGSTDIES[Phospho (STY)]TPK_.2		7418.31						7418.31	1									0			1									0									0			0
P32447	ASF1	270	_IEGGSTDIEST[Phospho (STY)]PK_.2	172896	126998	143615	146121	131569	134757	122652	139801	7	131601	158895	126593	138751	111643	151757	128394	135376	7	1.03269	0.856299	0	266610	152232	165469	160286	160882	162121	153301	174414	7	185883	194771	207323	180837	157595	178844	123246	175500	7	0.993816	0.982909	0
P32447	ASF1	270	_IEGGST[Phospho (STY)]DIEST[Phospho (STY)]PK_.2			2585.72	10716.7	5395.5		13890.3	8147.08	4	7125.87	20844.5	14568.6	10123.1	4907.03	21597	9578.19	12677.7	7	0.642628	0.624444	-3		6054.7	4225.4	6174.35		7403.71	5747.18	5921.07	5		7171.19	10899.9	14728.3	18096.9		5166.61	11212.6	5	0.528074	0.259777	0
P32447	ASF1	270	_KIEGGST[Phospho (STY)]DIEST[Phospho (STY)]PK_.2			4658.3	7375.84			5126.07	5720.07	3		8775.68				6751.91	5127.25	6884.95	3	0.830808	0.758446	0	3500.1		5059.25		5455.5	5104.23		4779.77	4	3097.51	7897.9	7529.12	9361.37	5035.24	5925.33	5026.75	6267.6	7	0.762615	0.53638	-3
P32447	ASF1	270	_IEGGSTDIES[Phospho (STY)]T[Phospho (STY)]PK_.2									0									0			0									0	246.604							246.604	1			-1
P32447	ASF1	270	_KIEGGSTDIEST[Phospho (STY)]PK_.3				9279.97		7293.98		8286.98	2	11074		5247.21		5754.45	4170.62	7766.4	6802.54	5	1.21822	0.80195	-3		5376.94			4901.97	5318.29		5199.07	3	17242.9	5350	5316.89	5743.28	5193.64		17933.5	9463.37	6	0.549388	0.611802	-3
P32447	ASF1	270	_KIEGGSTDIEST[Phospho (STY)]PK_.2	12211.9			6986.08				9598.97	2	14877.8				6812.04		8375.43	10021.7	3	0.957814	0.974261	-1	16276.7		8682.83			7169.34		10709.6	3			9296.88					9296.88	1	1.15196	0.934669	2
P40467	ASG1	166	_RDS[Phospho (STY)]QSFLDDTVK_.2									0									0			0	2967.81		1603.77					2285.79	2	3220.28							3220.28	1	0.709812	0.813215	1
P40467	ASG1	199	_NS[Phospho (STY)]T[Phospho (STY)]PDEFLPNMK_.2	9891.64	1213.62		1014.82		337.003	2298.24	2951.06	5	3889.7		1380.03	2026.19	1151.27			2111.8	4	1.39742	0.889456	1	10001.6	2667.04		1347.91	2150.32	2278.34	1107.95	3258.85	6	4926.32				1175.67			3051	2	1.06813	0.979511	4
P40467	ASG1	200	_NST[Phospho (STY)]PDEFLPNMK_.2	77326.7	25121.2	35470.6	28733.1	32529.4	28883.6	27647.4	36530.3	7	63523.9	33025.3	27427.7		23860.9	26722.9	23082.1	32940.5	6	1.10898	0.89712	1	90257.6	33313.3	31304.3	31717	30458.2	29296	28802.2	39306.9	7	56130	42062.1		38855.5	33558.4	35234.8	25285.9	38521.1	6	1.0204	0.979114	1
P40467	ASG1	200	_NS[Phospho (STY)]T[Phospho (STY)]PDEFLPNMK_.2	9891.64	1213.62		1014.82		337.003	2298.24	2951.06	5	3889.7		1380.03	2026.19	1151.27			2111.8	4	1.39742	0.889456	1	10001.6	2667.04		1347.91	2150.32	2278.34	1107.95	3258.85	6	4926.32				1175.67			3051	2	1.06813	0.979511	4
P40467	ASG1	223	_EQDS[Phospho (STY)]VDTYSNIPVGR_.2		42122.5	48408.9	50960.4	44647.6	43458.4	41588.4	45197.7	6	26523.1	64871.9	43869	49142.4	42054.6	47751	51413.9	46518	7	0.971618	0.930234	-1	33048.7	51110.4		56452.6	49144.6	51238.4	48814.5	48301.5	6	18547.8	61659		59505.3	49848.9	48439.4	34673.4	45445.6	6	1.06284	0.883155	0
P40467	ASG1	713	_NS[Phospho (STY)]FSLAK_.2	10651.6	9175.17	11549.4	11152	11929.7	10276	9485.08	10602.7	7	19165.9	21166.2	20783.9	17902.7	17059.5	19519.3	24130	19961.1	7	0.531169	4.52486e-05	0	11741.1	10607.2		9915.38	9082.04	10629.5	8733.34	10118.1	6	2304.01							2304.01	1	4.39153	0.0154041	5
P40467	ASG1	900	_IDNNSPSY[Phospho (STY)]EGFPQLQIPLSQDNLNIEDK_.3	15571.1	48951.7	20809			33708	39694	31746.8	5	9250.25	23886.9	4238.68		29245.3		21377.3	17599.7	5	1.80383	0.39443	0	11145	18844.1	17367.8			26682.7	29195.9	20647.1	5	9685.71	21609.4		11956.9		10234.5		13371.6	4	1.5441	0.428224	1
P40467	ASG1	924	_EEMS[Phospho (STY)]PNIEIK_.2	42691.8	39352.6	53922.7	49545.6	41178	44746.6	46111.8	45364.2	7	34231.3	58744	49983.3	50287.5	44260	46655.4	44166.1	46903.9	7	0.967172	0.873489	0	41789.9	47777.1	51509.1	57309.3	49936.5	50677.7	46920.9	49417.2	7	22848.9	87733.8	73973.7	75481.2	64008	64145.8	29964	59736.5	7	0.827253	0.606644	0
P40467	ASG1	924	_EEM[Oxidation (M)]S[Phospho (STY)]PNIEIK_.2	3898.16	3746.11	6227.75	8305.22	5434.65	5358.31	4903.45	5410.52	7	4118.35	7144.74	4758.75	5510.04	5148.43	6500.29	6856.81	5719.63	7	0.945956	0.882311	0	4362.14	4238.86	4199.27	4956.98	5589.5	4161.05	5040.81	4649.8	7	2556.46	6939.58	6030.29	8495.79	7913.17	6909.36	2372.08	5888.1	7	0.789694	0.534484	0
P40467	ASG1	963	_YLPLNYPS[Phospho (STY)]E_.2	214605	161518	167779	214031	148684	138300	141421	169477	7	238305	124940	122182	119205	101230	119918	164171	141422	7	1.19838	0.572583	0	121803	148758	120782	154336	138559	111994	105462	128813	7	235003	159016	126488	121816	147137	163627	183638	162389	7	0.793238	0.257707	0
P40467	ASG1	963	_YLPLNYPS[Phospho (STY)]E_.1	158306	51379.6	57375.9	73388.8	54872.6	48429.9	55554.1	71329.5	7	170655	48116	31539.8	39173.6	33944.8	43957.3	62282.4	61381.3	7	1.16207	0.884566	0	101696	49191	45114.8	49467.6	46188.2	38087.6	40839.8	52940.7	7	170721	56234.2	46475.9	48719.6	47244.5	58507.7	75545.1	71921.1	7	0.736094	0.65037	0
P46993	ASG7	121	_VMQNFS[Phospho (STY)]DSNS[Phospho (STY)]EEYYESK_.2				139877	35940.5	48946.7		74921.4	3									0			3	14118.8							14118.8	1	18467.2							18467.2	1	0.764535		0
P46993	ASG7	121	_VMQNFS[Phospho (STY)]DS[Phospho (STY)]NSEEYYESK_.2			30604.3			27525.7	60703.4	39611.1	3					16125.8	34733.3		25429.5	2	1.55768	0.750669	1				44112.6		54234.9	41545	46630.8	3			28384.7	44694	57354.9		44389	43705.6	4	1.06693	0.889614	-1
P46993	ASG7	121	_VM[Oxidation (M)]QNFS[Phospho (STY)]DS[Phospho (STY)]NSEEYYESK_.2			10430.6					10430.6	1									0			1	10798.9					11705.8		11252.3	2	11736.9			8191.68	9385.63	11831.5		10286.4	4	1.0939	0.783634	-2
P46993	ASG7	123	_VMQNFSDS[Phospho (STY)]NSEEYYESK_.2									0									0			0									0	57707.9							57707.9	1			-1
P46993	ASG7	123	_VMQNFS[Phospho (STY)]DS[Phospho (STY)]NSEEYYESK_.2			30604.3			27525.7	60703.4	39611.1	3					16125.8	34733.3		25429.5	2	1.55768	0.750669	1				44112.6		54234.9	41545	46630.8	3			28384.7	44694	57354.9		44389	43705.6	4	1.06693	0.889614	-1
P46993	ASG7	123	_VM[Oxidation (M)]QNFS[Phospho (STY)]DS[Phospho (STY)]NSEEYYESK_.2			10430.6					10430.6	1									0			1	10798.9					11705.8		11252.3	2	11736.9			8191.68	9385.63	11831.5		10286.4	4	1.0939	0.783634	-2
P46993	ASG7	125	_VMQNFSDSNS[Phospho (STY)]EEYYESK_.2	131018	214535	114594	187373	144654	162247	144005	156918	7	130664	53941.2	58045.7	50734	49448.2	51199.6	122156	73741.2	7	2.12796	0.0141932	0	125325	129648	103601	165442	179328	153885	119683	139559	7	163847	156491	90506	96097	143219	181669	176389	144031	7	0.968949	0.924685	0
P46993	ASG7	125	_VMQNFS[Phospho (STY)]DSNS[Phospho (STY)]EEYYESK_.2				139877	35940.5	48946.7		74921.4	3									0			3	14118.8							14118.8	1	18467.2							18467.2	1	0.764535		0
P46993	ASG7	125	_VM[Oxidation (M)]QNFSDSNS[Phospho (STY)]EEYYESK_.2	18940.8	39006.7	27572.9	43880	34193.3	34205.8	29711.5	32501.6	7		10608.2	11750.7	10450.7			30223.8	15758.3	4	2.0625	0.108001	3		25790.2	21484.5				26699.5	24658.1	3	27592.4	29186.7	20053.8	22640.6	36120.5	40412.2	30083.4	29441.4	7	0.837531	0.621962	-4
P46993	ASG7	138	_DGMPSS[Phospho (STY)]FLNVNTEQVEDENDTLK_.2						27590.5		27590.5	1									0			1		32357.7		41327.2				36842.4	2			24022.4			23478.3		23750.4	2	1.55124	0.347151	0
P46993	ASG7	138	_DGMPSS[Phospho (STY)]FLNVNTEQVEDENDTLKK_.3		13228.6	8163.62		12643	12105.6	10084.6	11245.1	5			7568.74				6065.7	6817.22	2	1.64951	0.230669	3	10473.5	15498.2	10305	13322.3	13465.3	13840.7	16468.5	13339.1	7	15220		5235.95		12734.8	9903.07	11868.6	10992.5	5	1.21347	0.51818	2
P46993	ASG7	144	_DGMPSSFLNVNT[Phospho (STY)]EQVEDENDT[Phospho (STY)]LK_.2		18329.7	10970.4	9665.55	10063	9840.47	14143	12168.7	6		12954.7	11037.5	9147.54	10175.6	10136.4	13555.1	11167.8	6	1.08962	0.816583	0		10895.1	14313.7	9836.58	11630.5	12343.4	12722.5	11957	6	4772.6	13116.9	11120.3	17655.4	16094.8	11509.9	20344.4	13516.3	7	0.884632	0.765124	-1
P46993	ASG7	153	_DGMPSSFLNVNT[Phospho (STY)]EQVEDENDT[Phospho (STY)]LK_.2		18329.7	10970.4	9665.55	10063	9840.47	14143	12168.7	6		12954.7	11037.5	9147.54	10175.6	10136.4	13555.1	11167.8	6	1.08962	0.816583	0		10895.1	14313.7	9836.58	11630.5	12343.4	12722.5	11957	6	4772.6	13116.9	11120.3	17655.4	16094.8	11509.9	20344.4	13516.3	7	0.884632	0.765124	-1
P34233	ASH1	56	_NNITTDNNINSAS[Phospho (STY)]PR_.2	123926	87194.1	104856	102115	96622.6	81484.2	70566.2	95251.8	7	194926	175931	175488	192188	157036	200554	149559	177955	7	0.535259	0.00014295	0	144843	84441.3	84325.7	92739.5	86710.6	84806.7	86358.3	94889.3	7	109754	135748	130317	118387	105580	121005	84209.7	115000	7	0.825125	0.310364	0
P34233	ASH1	148	_LS[Phospho (STY)]SVSLSK_.2		3441.42	5291.21	3760.91		4240.15	2807.71	3908.28	5	1375.77	1834.29	1943.43		1607.73		2400.79	1832.4	5	2.13287	0.0249889	0	2796.32	2650.51			1070.69	1884.25		2100.44	4									0			4
P34233	ASH1	149	_LSS[Phospho (STY)]VS[Phospho (STY)]LSK_.2		123742	128641		128383	123998	114240	123801	5	84830	109095	108067	116858	92739.3	122196	151678	112209	7	1.1033	0.634357	-2		104123	101859	107381	100746	102508	86537.6	100526	6	65852.8	121718		112254	109812		129702	107868	5	0.931935	0.773181	1
P34233	ASH1	149	_LSS[Phospho (STY)]VS[Phospho (STY)]LSK_.1	14726.2	4896.9	4980.18	3075.17	4616.97	4991.6	5995.54	6183.22	7	14897.1	9704.53	4413.77	4740.25	3412.65	4915.6	8670.51	7250.62	7	0.852785	0.85679	0	7203.53	3750.71	6198.04	4600.69	4598.89	5760.86	5161.65	5324.91	7	9235.07	6402.82	6914.21	6854.66	6195.66	6473.52	8984.62	7294.36	7	0.730003	0.0770018	0
P34233	ASH1	149	_LSS[Phospho (STY)]VSLSK_.2	28830.2	16403	17625.3	21400.6	18892.4	19262.7	15992.6	19772.4	7	26847	7619.31		7285.16	5087.67	8600.1	8984.81	10737.3	6	1.84146	0.171802	1		13026.2	13569.7	14869.7	14499.6	14521.3	12045.6	13755.3	6	2227.22	2729.61		2724.47	2704.88		2934.75	2664.19	5	5.16305	4.99358e-07	1
P34233	ASH1	151	_LSS[Phospho (STY)]VS[Phospho (STY)]LSK_.2		123742	128641		128383	123998	114240	123801	5	84830	109095	108067	116858	92739.3	122196	151678	112209	7	1.1033	0.634357	-2		104123	101859	107381	100746	102508	86537.6	100526	6	65852.8	121718		112254	109812		129702	107868	5	0.931935	0.773181	1
P34233	ASH1	151	_LSS[Phospho (STY)]VS[Phospho (STY)]LSK_.1	14726.2	4896.9	4980.18	3075.17	4616.97	4991.6	5995.54	6183.22	7	14897.1	9704.53	4413.77	4740.25	3412.65	4915.6	8670.51	7250.62	7	0.852785	0.85679	0	7203.53	3750.71	6198.04	4600.69	4598.89	5760.86	5161.65	5324.91	7	9235.07	6402.82	6914.21	6854.66	6195.66	6473.52	8984.62	7294.36	7	0.730003	0.0770018	0
P34233	ASH1	151	_LSSVS[Phospho (STY)]LSK_.2									0									0			0									0									0			0
P34233	ASH1	290	_DLSNNAWSITPPVT[Phospho (STY)]PPMSPPTNR_.3		3321.94	7804.64	11041		6102.8	8097.35	7273.54	5		1605.61						1605.61	1	4.53008	0.469519	4	21443.5			11212.6		2592.58	7764.33	10753.3	4									0			4
P34233	ASH1	290	_DLSNNAWSITPPVT[Phospho (STY)]PPMS[Phospho (STY)]PPTNR_.3	11332.7							11332.7	1	13160.7							13160.7	1	0.861099		0	15109.9							15109.9	1	3360.15							3360.15	1	4.49679		0
P34233	ASH1	294	_DLSNNAWSITPPVTPPMS[Phospho (STY)]PPTNR_.3	112347	59840.8	65711.1	62447.6	60160.8	54819.6	65015.3	68620.3	7	115706	70763.4	61132.7	62970.6	43621.5	46851.1	57617.9	65523.4	7	1.04726	0.931189	0	106190	52964.3	57786.6	54537	53751.9	43585.3	46792.2	59372.5	7	75025	49123.8	35946.9	31708.2	39318.4	37462.3	36337.2	43560.3	7	1.363	0.405496	0
P34233	ASH1	294	_DLSNNAWSITPPVT[Phospho (STY)]PPMS[Phospho (STY)]PPTNR_.3	11332.7							11332.7	1	13160.7							13160.7	1	0.861099		0	15109.9							15109.9	1	3360.15							3360.15	1	4.49679		0
P34233	ASH1	429	_LDNASYSSVSASSSPSPST[Phospho (STY)]PTK_.2		24038.6				22475.9	22763.1	23092.6	3	55793.9	51308.5	51999		49939.2		56061.2	53020.4	5	0.435541	0.000128659	-2		4653.01	18912.9					11783	2	30417.2	29568.9			42594.4	36300.3	30874.3	33951	5	0.347058	0.0788157	-3
P34233	ASH1	431	_LDNASYSSVSASSSPSPSTPT[Phospho (STY)]K_.2									0									0			0					5312.27			5312.27	1									0			1
P34233	ASH1	450	_AYT[Phospho (STY)]PS[Phospho (STY)]PR_.2	12867	46779.4	58892.3	69740.4	45467.4	42218.1	51124	46727	7	54093.1	293035	236877	198534	145717	298692	207028	204854	7	0.228099	0.00860312	0	19161.8	63479.6	64482.7	62861.5	68251.3	65317.3	51655	56458.5	7	15734.6	229943	198992	235209	185802	177764	73824.6	159610	7	0.353727	0.059692	0
P34233	ASH1	450	_AYT[Phospho (STY)]PSPR_.2	79948	52351.6	55495.8	48712.7	54584.7	56634	43245.7	55853.2	7	125025	168674	170441	87979.2	147842	194146	219583	159098	7	0.351061	0.0017744	0	60087.1	51645.8	51028.2	61180.8	51765.4	50888.6	53445.6	54291.6	7	100088	189728	136134	160905	147978	123390	157791	145145	7	0.374051	0.000105303	0
P34233	ASH1	452	_AYT[Phospho (STY)]PS[Phospho (STY)]PR_.2	12867	46779.4	58892.3	69740.4	45467.4	42218.1	51124	46727	7	54093.1	293035	236877	198534	145717	298692	207028	204854	7	0.228099	0.00860312	0	19161.8	63479.6	64482.7	62861.5	68251.3	65317.3	51655	56458.5	7	15734.6	229943	198992	235209	185802	177764	73824.6	159610	7	0.353727	0.059692	0
P34233	ASH1	452	_AYTPS[Phospho (STY)]PR_.2	55430	38448.4	47261.2	40301.8	46830.4	40614.3	29961.3	42692.5	7	30288.5		21201.9			9758.69		20416.4	3	2.09109	0.0610355	4	35221.7	34463.7	23742.4	36147	28506.6	25458.2	31554.2	30727.7	7	31122.9			4991.53		28446.2	29298.9	23464.9	4	1.30952	0.498404	3
P34233	ASH1	465	_FALDS[Phospho (STY)]PPQS[Phospho (STY)]PR_.2	444277	405860	421602	552734	409500	385246	354531	424822	7	965532	554593	534897	533928	453937	570064	902277	645033	7	0.658605	0.131372	0	294522	301759	269586	365605	319981	294047	248918	299202	7	427449	563851	432323	400170	448794	510304	611473	484909	7	0.617028	0.00212133	0
P34233	ASH1	465	_FALDS[Phospho (STY)]PPQSPR_.2	303117	275549	283957	333899	254757	253344	239891	277788	7	108373	69107.5	58844.5	60596.8	52615.7	58804.2	116262	74943.4	7	3.70663	4.38346e-06	0	203038	186962	174322	217802	197549	179383	176764	190831	7	38987.2	49898.6	37081.2	40852.1	38753.4	40726.8	50851.1	42450	7	4.49544	1.19807e-08	0
P34233	ASH1	469	_FALDS[Phospho (STY)]PPQS[Phospho (STY)]PR_.2	444277	405860	421602	552734	409500	385246	354531	424822	7	965532	554593	534897	533928	453937	570064	902277	645033	7	0.658605	0.131372	0	294522	301759	269586	365605	319981	294047	248918	299202	7	427449	563851	432323	400170	448794	510304	611473	484909	7	0.617028	0.00212133	0
P34233	ASH1	469	_FALDSPPQS[Phospho (STY)]PR_.2	130770	114721	97546.8	140644	101088	102244	96787.6	111972	7	120233	72555.5	56936.6	62597.4	56403.4	56956.8	116085	77395.4	7	1.44675	0.134495	0	106885	68761.3	64357.6	105170	90697.2	82195.8	67288	83622.1	7	81218.6	100294	78383.9	62325.8	73467.4	90020.2	93624	82762	7	1.01039	0.970604	0
P53895	ASI2	69	_NMS[Phospho (STY)]STSNINR_.2	14107.7	3183.43	5930.73	3964.22	5366.83	4711	4191.99	5922.26	7	2836.95							2836.95	1	2.08755	0.778194	6	9087.12	4374.79	2741.6	3461.84	2815.23	3689.66	3407.06	4225.33	7	1836	715.501	1184.69				1249.48	1246.42	4	3.38998	0.157548	3
P53983	ASI3	475	_S[Phospho (STY)]LELLLPEDDSSK_.2	45011.5	42565.5	42623.8	48421.6	38804.6	37727.5	35655.9	41544.3	7	51916.5	33693.6	30442.3	29774.5	24479.9	35826.5	41581.3	35387.8	7	1.17397	0.451792	0	20835.5	36829.4	31115.2	32062.4	32236.8	28384	25990.2	29636.2	7	29112.4	34339.2	28437.7	29723.5	27661.8	38255.7	35488.9	31859.9	7	0.930206	0.696125	0
P35734	ASK1	26	_IDS[Phospho (STY)]NLSFC[Carbamidomethyl (C)]FHK_.2		7760.02			3387.74	5760.71	7318.23	6056.68	4	7114.66	3326.45		4900.33	3660.45		4141.55	4628.69	5	1.30851	0.614838	-1		4540.52	5194.77			4921.24	8075.44	5682.99	4	13116		4499.82	4080.57		5862.79	8417.38	7195.32	5	0.789818	0.759005	-1
P35734	ASK1	107	_QS[Phospho (STY)]QTDNGPNEADSAVHVNR_.3		11181.4			9360.94			10271.2	2	9842.87							9842.87	1	1.04352	0.94566	1	9074.13		8630.09		8772.95			8825.72	3	11896.5		9089.34				12092.6	11026.2	3	0.800435	0.320623	0
P35734	ASK1	109	_QSQT[Phospho (STY)]DNGPNEADSAVHVNR_.3				6427.57		7120.24	6406.3	6651.37	3			7245.41	6230.61	6072.17	7518.14	6619.04	6737.07	5	0.987279	0.949406	-2		5671.79		5209.07				5440.43	2		5505.57						5505.57	1	0.988169	0.961703	1
P35734	ASK1	109	_QSQT[Phospho (STY)]DNGPNEADSAVHVNR_.2	6891.41		1989.4					4440.4	2							2009.13	2009.13	1	2.21011	0.877739	1	6133.31							6133.31	1							2833.54	2833.54	1	2.16454		0
P35734	ASK1	118	_QSQTDNGPNEADS[Phospho (STY)]AVHVNR_.2		1558.21		1496.42	2449.61	2784.53	2731.94	2204.14	5			2059.16		2738.9			2399.03	2	0.918763	0.898954	3		1439.76	2205.06	3429.81	2322.76	1748.17		2229.11	5			1216.04	1829.86				1522.95	2	1.46368	0.602426	3
P35734	ASK1	155	_LPDS[Phospho (STY)]SDEDTGSEAVPSR_.2	247692	205114	225325	240201	212336	197297	189008	216711	7	192292		180116	188422	165460	202999	204897	189031	6	1.14643	0.164335	1	218264	195740	203791	215870	191814	199054	185012	201364	7	226246	274967	263005	264657	227431		281749	256343	6	0.785525	0.0039002	1
P35734	ASK1	155	_LPDS[Phospho (STY)]S[Phospho (STY)]DEDT[Phospho (STY)]GSEAVPSR_.2		285163	335960	381550	281865	227528	245858	292987	6	19244.1	517187	411825	343879	254410	504935	307096	336940	7	0.869555	0.826418	-1	146169	321000	317256	346374	332492	334396	251052	292677	7	180914	488118	431150	454538	311748	342340	329668	362639	7	0.807075	0.468736	0
P35734	ASK1	155	_LPDS[Phospho (STY)]S[Phospho (STY)]DEDTGS[Phospho (STY)]EAVPSR_.2									0									0			0	19312.9							19312.9	1									0			1
P35734	ASK1	155	_LPDS[Phospho (STY)]S[Phospho (STY)]DEDT[Phospho (STY)]GS[Phospho (STY)]EAVPSR_.2		10167.7	19767.2	121920	26468.3	6521.54	66093.7	41823.1	6		172994	141295	113845	53236	191739	11737.2	114141	6	0.366415	0.287119	0		30705.6	4952.33	87058.4	18235.4	37961.6	49671	38097.4	6		92127.1	4185.55	109610	52880.9	6115.88	49873.6	52465.4	6	0.726142	0.778845	0
P35734	ASK1	155	_LPDS[Phospho (STY)]S[Phospho (STY)]DEDTGSEAVPSR_.2	1.33115e+06	1221829	1.46581e+06	1.60216e+06	1.29234e+06	1221613	1.07726e+06	1.31602e+06	7	933560	1.22912e+06	1.18114e+06	1.17105e+06	898839	1.21477e+06	1.11808e+06	1.10665e+06	7	1.18919	0.177004	0	1412077	1.3309e+06	1244447	1.43804e+06	1.30992e+06	1.28772e+06	1.14454e+06	1.30966e+06	7	1.2185e+06	1.51952e+06	1.51782e+06	1.36762e+06	1.0433e+06	1.31332e+06	1572410	1.36464e+06	7	0.959713	0.778476	0
P35734	ASK1	155	_LPDS[Phospho (STY)]S[Phospho (STY)]DEDTGSEAVPSR_.3	60669.3		15898.2		17508.9			31358.8	3	45106.9			15157.4	11038.2		13133.2	21108.9	4	1.48557	0.815689	-1	46712.6	18221.9		20207.6	19136.1		15168.4	23889.3	5	54515.4		18096.8	17600.9	10015		20178	24081.2	5	0.99203	0.994211	0
P35734	ASK1	156	_LPDSS[Phospho (STY)]DEDTGSEAVPSR_.2	264630							264630	1									0			1									0						236269		236269	1			-1
P35734	ASK1	156	_LPDS[Phospho (STY)]S[Phospho (STY)]DEDT[Phospho (STY)]GSEAVPSR_.2		285163	335960	381550	281865	227528	245858	292987	6	19244.1	517187	411825	343879	254410	504935	307096	336940	7	0.869555	0.826418	-1	146169	321000	317256	346374	332492	334396	251052	292677	7	180914	488118	431150	454538	311748	342340	329668	362639	7	0.807075	0.468736	0
P35734	ASK1	156	_LPDS[Phospho (STY)]S[Phospho (STY)]DEDTGS[Phospho (STY)]EAVPSR_.2									0									0			0	19312.9							19312.9	1									0			1
P35734	ASK1	156	_LPDS[Phospho (STY)]S[Phospho (STY)]DEDT[Phospho (STY)]GS[Phospho (STY)]EAVPSR_.2		10167.7	19767.2	121920	26468.3	6521.54	66093.7	41823.1	6		172994	141295	113845	53236	191739	11737.2	114141	6	0.366415	0.287119	0		30705.6	4952.33	87058.4	18235.4	37961.6	49671	38097.4	6		92127.1	4185.55	109610	52880.9	6115.88	49873.6	52465.4	6	0.726142	0.778845	0
P35734	ASK1	156	_LPDS[Phospho (STY)]S[Phospho (STY)]DEDTGSEAVPSR_.2	1.33115e+06	1221829	1.46581e+06	1.60216e+06	1.29234e+06	1221613	1.07726e+06	1.31602e+06	7	933560	1.22912e+06	1.18114e+06	1.17105e+06	898839	1.21477e+06	1.11808e+06	1.10665e+06	7	1.18919	0.177004	0	1412077	1.3309e+06	1244447	1.43804e+06	1.30992e+06	1.28772e+06	1.14454e+06	1.30966e+06	7	1.2185e+06	1.51952e+06	1.51782e+06	1.36762e+06	1.0433e+06	1.31332e+06	1572410	1.36464e+06	7	0.959713	0.778476	0
P35734	ASK1	156	_LPDS[Phospho (STY)]S[Phospho (STY)]DEDTGSEAVPSR_.3	60669.3		15898.2		17508.9			31358.8	3	45106.9			15157.4	11038.2		13133.2	21108.9	4	1.48557	0.815689	-1	46712.6	18221.9		20207.6	19136.1		15168.4	23889.3	5	54515.4		18096.8	17600.9	10015		20178	24081.2	5	0.99203	0.994211	0
P35734	ASK1	160	_LPDS[Phospho (STY)]S[Phospho (STY)]DEDT[Phospho (STY)]GSEAVPSR_.2		285163	335960	381550	281865	227528	245858	292987	6	19244.1	517187	411825	343879	254410	504935	307096	336940	7	0.869555	0.826418	-1	146169	321000	317256	346374	332492	334396	251052	292677	7	180914	488118	431150	454538	311748	342340	329668	362639	7	0.807075	0.468736	0
P35734	ASK1	160	_LPDS[Phospho (STY)]S[Phospho (STY)]DEDT[Phospho (STY)]GS[Phospho (STY)]EAVPSR_.2		10167.7	19767.2	121920	26468.3	6521.54	66093.7	41823.1	6		172994	141295	113845	53236	191739	11737.2	114141	6	0.366415	0.287119	0		30705.6	4952.33	87058.4	18235.4	37961.6	49671	38097.4	6		92127.1	4185.55	109610	52880.9	6115.88	49873.6	52465.4	6	0.726142	0.778845	0
P35734	ASK1	162	_LPDS[Phospho (STY)]S[Phospho (STY)]DEDTGS[Phospho (STY)]EAVPSR_.2									0									0			0	19312.9							19312.9	1									0			1
P35734	ASK1	162	_LPDS[Phospho (STY)]S[Phospho (STY)]DEDT[Phospho (STY)]GS[Phospho (STY)]EAVPSR_.2		10167.7	19767.2	121920	26468.3	6521.54	66093.7	41823.1	6		172994	141295	113845	53236	191739	11737.2	114141	6	0.366415	0.287119	0		30705.6	4952.33	87058.4	18235.4	37961.6	49671	38097.4	6		92127.1	4185.55	109610	52880.9	6115.88	49873.6	52465.4	6	0.726142	0.778845	0
P35734	ASK1	174	_EQTDLT[Phospho (STY)]GEGHGGADDEQDESTIQR_.3	5668.17	13008.1	15942.5	13677.9	13065.4	10063.8		11904.3	6	3601.35	13756.8	11652.8	8967.46	9155	11967.9	10460	9937.33	7	1.19794	0.676558	-1	12631.7	12865	11659	12808.4	13315.4	11038.9	11046.3	12195	7	1660.14	5923.4	3341.7	4392.11	3496.48	4567.75	3369.36	3821.56	7	3.19109	1.22215e-06	0
P35734	ASK1	188	_EQTDLTGEGHGGADDEQDES[Phospho (STY)]T[Phospho (STY)]IQR_.3		13910.1	47933.8	29420	40751.7	45501.8	39601.3	36186.5	6	1605.25	81525.6	74360.9	71392.3	63820.1	84669	70683.7	64008.1	7	0.565342	0.259562	-1	50261.2	51266.8	59992.7	46750.2	48417.1	56090.3	53111.3	52269.9	7	73823.9	4412.71	121683	108357	22918.8		31092	60381.2	6	0.865665	0.861088	1
P35734	ASK1	188	_EQTDLTGEGHGGADDEQDES[Phospho (STY)]TIQR_.3	29350.4	40700.1	49705.1	44971.3	41375.3	42286.4	35456.1	40549.2	7	33939.9	66406.2	60720.6	60153.7	56453.9	66518.9	48553.6	56106.7	7	0.722717	0.0852135	0	31755.8	37481.7	39946.2	31815.5	37172.4	32956.7	34203.7	35047.4	7	5217.78	7694.66	9362.5	8205.31	6218.27	6889.78	8432.72	7431.57	7	4.71602	2.83976e-08	0
P35734	ASK1	188	_EQTDLTGEGHGGADDEQDES[Phospho (STY)]TIQR_.2									0			2863.76	1921.62	2882.05		3960.02	2906.86	4			-4			2712.12					2712.12	1									0			1
P35734	ASK1	189	_EQTDLTGEGHGGADDEQDES[Phospho (STY)]T[Phospho (STY)]IQR_.3		13910.1	47933.8	29420	40751.7	45501.8	39601.3	36186.5	6	1605.25	81525.6	74360.9	71392.3	63820.1	84669	70683.7	64008.1	7	0.565342	0.259562	-1	50261.2	51266.8	59992.7	46750.2	48417.1	56090.3	53111.3	52269.9	7	73823.9	4412.71	121683	108357	22918.8		31092	60381.2	6	0.865665	0.861088	1
P35734	ASK1	189	_EQTDLTGEGHGGADDEQDEST[Phospho (STY)]IQR_.3		4462.62	4899.15	5744.45	3538.07	3496.13	3024.94	4194.23	6		3061.6	2761.54	1531.24	1565.6	2630.49	1795.56	2224.34	6	1.88561	0.0352633	0	4243.72	5173.83	5882.97	4259.57	5631.93	5041.36	4243.48	4925.27	7		2042.4	4103.55	3031.94	1827.99	2477.4		2696.66	5	1.82643	0.00927863	2
P35734	ASK1	249	_QLAHEEHINNDGDNDDENSNNIES[Phospho (STY)]SPLK_.3				5974.01				5974.01	1			6210.43	8285.34				7247.89	2	0.824242	0.849174	-1					5309.01			5309.01	1		3526.86		4599.25				4063.05	2	1.30666	0.709244	-1
P35734	ASK1	250	_QLAHEEHINNDGDNDDENSNNIESS[Phospho (STY)]PLK_.3		27572.5	29343.6	22435.9	19122.7	34747.6	18842	25344	6		16429.7	25975.1	24393.8	22046.5	25100	16861.6	21801.1	6	1.16251	0.636202	0		12254.6	13681.1	16320.4	17238	22213.1	20419.1	17021	6	9300.6	13114.1	8566.09	17476.5	23559.2	26711.6	14594.7	16189	7	1.0514	0.923257	-1
P35734	ASK1	250	_QLAHEEHINNDGDNDDENSNNIESS[Phospho (STY)]PLK_.4									0							1382.45	1382.45	1			-1									0					3510.22	490.824	2976.2	2325.75	3			-3
P48361	ASK10	21	_PSQTLTPMGNKPS[Phospho (STY)]GGGGGDDASSIHS[Phospho (STY)]K_.2									0	10619.9							10619.9	1			-1	9364.48							9364.48	1									0			1
P48361	ASK10	21	_PSQTLTPM[Oxidation (M)]GNKPS[Phospho (STY)]GGGGGDDASSIHS[Phospho (STY)]K_.3									0									0			0					11119.6			11119.6	1									0			1
P48361	ASK10	21	_PSQTLTPMGNKPS[Phospho (STY)]GGGGGDDASSIHSK_.3	12401.1	11704.3	6506.24					10203.9	3				10226.6				10226.6	1	0.997777	0.998939	2					6406.74			6406.74	1									0			1
P48361	ASK10	30	_PSQTLTPMGNKPSGGGGGDDAS[Phospho (STY)]SIHS[Phospho (STY)]K_.3				114145				114145	1									0			1									0				116139		113829		114984	2			-2
P48361	ASK10	30	_PSQTLTPMGNKPSGGGGGDDAS[Phospho (STY)]S[Phospho (STY)]IHS[Phospho (STY)]K_.3	8448.48						6475.79	7462.13	2	6214							6214	1	1.20086	0.84485	1			12840.8					12840.8	1									0			1
P48361	ASK10	31	_PSQTLTPMGNKPSGGGGGDDASS[Phospho (STY)]IHS[Phospho (STY)]K_.3	164041	146108	117240		102558	122718	122345	129168	6	180150		124342	127963				144152	3	0.896059	0.752011	3	195578	126557	159229	139746	122375		132423	145985	6	182281	125369			160212		124214	148019	4	0.986257	0.967806	2
P48361	ASK10	31	_PSQTLTPMGNKPSGGGGGDDASS[Phospho (STY)]IHS[Phospho (STY)]K_.4									0									0			0	2999.93							2999.93	1									0			1
P48361	ASK10	31	_PSQTLTPM[Oxidation (M)]GNKPSGGGGGDDASS[Phospho (STY)]IHS[Phospho (STY)]K_.3	16802.9	16468.2	16207.1	14041.5	14395.2	17406.3	14696	15716.8	7	22036.4	11378.9	11886.9	17658.4	18411.2	15317.2	18186	16410.7	7	0.957712	0.872797	0	26481.2	13502.7	14829.5	14292.6	10735.2	13208.4	17329.4	15768.4	7	20342.6		16141.5	14381.7	19945.3	12642.4		16690.7	5	0.944742	0.894919	2
P48361	ASK10	31	_PSQTLTPMGNKPSGGGGGDDAS[Phospho (STY)]S[Phospho (STY)]IHS[Phospho (STY)]K_.3	8448.48						6475.79	7462.13	2	6214							6214	1	1.20086	0.84485	1			12840.8					12840.8	1									0			1
P48361	ASK10	31	_PSQTLTPMGNKPSGGGGGDDASS[Phospho (STY)]IHSK_.3									0							6472.21	6472.21	1			-1	25782.2		9476.84					17629.5	2	21819							21819	1	0.807988	0.930697	1
P48361	ASK10	31	_PSQTLTPMGNKPSGGGGGDDASS[Phospho (STY)]IHSK_.4									0					1751.04			1751.04	1			-1			1685.84					1685.84	1	3733.11						1944.5	2838.81	2	0.593855	0.82345	-1
P48361	ASK10	34	_PSQTLTPMGNKPSGGGGGDDASS[Phospho (STY)]IHS[Phospho (STY)]K_.3	164041	146108	117240		102558	122718	122345	129168	6	180150		124342	127963				144152	3	0.896059	0.752011	3	195578	126557	159229	139746	122375		132423	145985	6	182281	125369			160212		124214	148019	4	0.986257	0.967806	2
P48361	ASK10	34	_PSQTLTPMGNKPSGGGGGDDASS[Phospho (STY)]IHS[Phospho (STY)]K_.4									0									0			0	2999.93							2999.93	1									0			1
P48361	ASK10	34	_PSQTLTPMGNKPSGGGGGDDAS[Phospho (STY)]SIHS[Phospho (STY)]K_.3				114145				114145	1									0			1									0				116139		113829		114984	2			-2
P48361	ASK10	34	_PSQTLTPMGNKPS[Phospho (STY)]GGGGGDDASSIHS[Phospho (STY)]K_.2									0	10619.9							10619.9	1			-1	9364.48							9364.48	1									0			1
P48361	ASK10	34	_PSQTLTPM[Oxidation (M)]GNKPSGGGGGDDASS[Phospho (STY)]IHS[Phospho (STY)]K_.3	16802.9	16468.2	16207.1	14041.5	14395.2	17406.3	14696	15716.8	7	22036.4	11378.9	11886.9	17658.4	18411.2	15317.2	18186	16410.7	7	0.957712	0.872797	0	26481.2	13502.7	14829.5	14292.6	10735.2	13208.4	17329.4	15768.4	7	20342.6		16141.5	14381.7	19945.3	12642.4		16690.7	5	0.944742	0.894919	2
P48361	ASK10	34	_PSQTLTPM[Oxidation (M)]GNKPS[Phospho (STY)]GGGGGDDASSIHS[Phospho (STY)]K_.3									0									0			0					11119.6			11119.6	1									0			1
P48361	ASK10	34	_PSQTLTPMGNKPSGGGGGDDAS[Phospho (STY)]S[Phospho (STY)]IHS[Phospho (STY)]K_.3	8448.48						6475.79	7462.13	2	6214							6214	1	1.20086	0.84485	1			12840.8					12840.8	1									0			1
P48361	ASK10	34	_PSQTLTPMGNKPSGGGGGDDASSIHS[Phospho (STY)]K_.3									0									0			0	25680.6							25680.6	1	13679.5							13679.5	1	1.8773		0
P48361	ASK10	34	_PSQTLTPMGNKPSGGGGGDDASSIHS[Phospho (STY)]K_.4							848.48	848.48	1									0			1	3010.46						1106.8	2058.63	2									0			2
P48361	ASK10	223	_MS[Phospho (STY)]LAPHEYKPVQTTESDNTSAASGFVK_.3		13886.8				11603.6	12594.1	12694.8	3							9794.41	9794.41	1	1.29613	0.497418	2			12433.8			7114.22	13622.8	11056.9	3	16782.6				20012			18397.3	2	0.601007	0.308879	1
P48361	ASK10	539	_SSAYSSSVS[Phospho (STY)]IADTYANANNAK_.2	11097.5	12400.5	6093.94				11262	10213.5	4				8210.8	9048.38		10752.9	9337.38	3	1.09383	0.865127	1						9965.3		9965.3	1					8880.67		15810	12345.3	2	0.807211	0.907487	-1
P48361	ASK10	627	_SSS[Phospho (STY)]STYLSGSSQASLPK_.2									0		437629	457532	424529		369930		422405	4			-4				487230				487230	1						481461		481461	1	1.01198		0
P48361	ASK10	630	_SSSSTY[Phospho (STY)]LSGSSQASLPK_.3	8089.75	5725.25	3453.86	4663.27	4026.57	2264.06	3430.69	4521.92	7	6196.47	2694.8	3283.69	2134.72	3521.89	1902.59	4838.76	3510.42	7	1.28814	0.65358	0		3161.08	2891.12	2892.97	2247.66	2081.54	2989.34	2710.62	6		3318.83	3019.41	3571.41	3549.2	3314.33	4288.79	3510.33	6	0.772184	0.0731683	0
P48361	ASK10	630	_SSSSTY[Phospho (STY)]LSGSSQAS[Phospho (STY)]LPK_.2						4366.9	3597.21	3982.05	2					4388.98			4388.98	1	0.907284	0.869291	1									0									0			0
P48361	ASK10	635	_SSSSTYLSGSS[Phospho (STY)]QAS[Phospho (STY)]LPK_.2	7352.96	3904.71		5073.29		2974.66	4243.54	4709.83	5	7073.95	7132.2	4639.86	4940.66	5644.97	6929.46	6623.25	6140.62	7	0.766996	0.37892	-2	3922.51		4733.06		4684.1			4446.56	3	7667.4	7174.3	6449.51	6370.46	6715.62	7395.17		6962.08	6	0.638683	0.00367413	-3
P48361	ASK10	638	_SSSSTYLSGSS[Phospho (STY)]QAS[Phospho (STY)]LPK_.2	7352.96	3904.71		5073.29		2974.66	4243.54	4709.83	5	7073.95	7132.2	4639.86	4940.66	5644.97	6929.46	6623.25	6140.62	7	0.766996	0.37892	-2	3922.51		4733.06		4684.1			4446.56	3	7667.4	7174.3	6449.51	6370.46	6715.62	7395.17		6962.08	6	0.638683	0.00367413	-3
P48361	ASK10	638	_SSSSTY[Phospho (STY)]LSGSSQAS[Phospho (STY)]LPK_.2						4366.9	3597.21	3982.05	2					4388.98			4388.98	1	0.907284	0.869291	1									0									0			0
P48361	ASK10	638	_SSSSTYLSGSSQAS[Phospho (STY)]LPK_.2					3263.32		5003.84	4133.58	2		6614.55	6859.03	5377.07	6375.58		4388.47	5922.94	5	0.697893	0.392942	-3			4547.73			1995.53	3835.05	3459.44	3	3285.81	4980.17	6201.71	4646.11	7609.47	7050.3	4508.54	5468.87	7	0.632569	0.316952	-4
P48361	ASK10	804	_S[Phospho (STY)]KVNT[Phospho (STY)]PAIDDYGNLITVER_.3	7722.98	15138	20910.4	15210.1	18000.6	13832.2	15924.6	15248.4	7	9585.61	9972.08	12127.2	9222.5	11249	8567.59	13760.3	10640.6	7	1.43304	0.134694	0	12466.2	21028.3	17452.5	20287.7	16327.6	16188.8	23139.9	18127.3	7	9923.13	10018		10809.1	17066	12283.1	16410.1	12751.6	6	1.42157	0.107867	1
P48361	ASK10	808	_S[Phospho (STY)]KVNT[Phospho (STY)]PAIDDYGNLITVER_.3	7722.98	15138	20910.4	15210.1	18000.6	13832.2	15924.6	15248.4	7	9585.61	9972.08	12127.2	9222.5	11249	8567.59	13760.3	10640.6	7	1.43304	0.134694	0	12466.2	21028.3	17452.5	20287.7	16327.6	16188.8	23139.9	18127.3	7	9923.13	10018		10809.1	17066	12283.1	16410.1	12751.6	6	1.42157	0.107867	1
P48361	ASK10	808	_VNT[Phospho (STY)]PAIDDYGNLITVER_.2	57716.2	20359.8	80728.3	65310.1	53275.4	18029.4	25301.8	45817.3	7	55468.8	51610.7	26272.7	40238.4	25928.4	44387.5	54449.8	42622.3	7	1.07496	0.919471	0	95196.6	103884	75821.4	72553.6	68265.1	72124.4	75198.7	80434.8	7	60765.7	72652.8	41634.9	68915.5	63441.9	62915.6	63360	61955.2	7	1.29827	0.0897124	0
P48361	ASK10	808	_VNT[Phospho (STY)]PAIDDYGNLITVER_.3									0									0			0	7766.78							7766.78	1	5046.76							5046.76	1	1.53896		0
P48361	ASK10	944	_NS[Phospho (STY)]EGS[Phospho (STY)]S[Phospho (STY)]PC[Carbamidomethyl (C)]YNDDQIR_.2	2539.26	38405.5					31766.9	24237.2	3		63422.8		29648.3			21975	38348.7	3	0.632023	0.766359	0		55207.5	50128.3		43009.9	52536.5	43631.4	48902.7	5		70206.5	95950.1	74978.7		56474.7		74402.5	4	0.657273	0.0901167	1
P48361	ASK10	944	_NS[Phospho (STY)]EGS[Phospho (STY)]SPC[Carbamidomethyl (C)]YNDDQIR_.2	24382.4	16112.6	18876.4	20117.1	18140.3	18691.2	14255.2	18653.6	7	11058.6	10794.3		7805.53				9886.13	3	1.88685	0.0312777	4		18030.4	17458.7	18757.7	15835.7	17618.3	16550.1	17375.1	6	20572.3	17037.6	16611.5		6889.24	15933.9		15408.9	5	1.1276	0.684852	1
P48361	ASK10	944	_NS[Phospho (STY)]EGSS[Phospho (STY)]PC[Carbamidomethyl (C)]YNDDQIR_.2	12052.8	11814	16380			11377.2	10621.2	12449	5	14869					13528.3		14198.7	2	0.876775	0.70508	3		16914.1		13667.9	13448.5	13226.8	12916.1	14034.7	5	22403.6	16528.3		15583.4	6962	16947	16476.3	15816.8	6	0.887328	0.751194	-1
P48361	ASK10	944	_NS[Phospho (STY)]EGSSPC[Carbamidomethyl (C)]YNDDQIR_.2	160709	97354		79305.4	104441	77710.7	44015.5	93922.7	6	109639		77148.7	70559.8	72915.8	72335.3	65509.4	78018.1	6	1.20386	0.717599	0	65023.7	135978		104808	106852	75727.3	67775	92694	6	146495	129588			29844.6	131590	70976	101699	5	0.911456	0.885334	1
P48361	ASK10	947	_NS[Phospho (STY)]EGS[Phospho (STY)]S[Phospho (STY)]PC[Carbamidomethyl (C)]YNDDQIR_.2	2539.26	38405.5					31766.9	24237.2	3		63422.8		29648.3			21975	38348.7	3	0.632023	0.766359	0		55207.5	50128.3		43009.9	52536.5	43631.4	48902.7	5		70206.5	95950.1	74978.7		56474.7		74402.5	4	0.657273	0.0901167	1
P48361	ASK10	947	_NS[Phospho (STY)]EGS[Phospho (STY)]SPC[Carbamidomethyl (C)]YNDDQIR_.2	24382.4	16112.6	18876.4	20117.1	18140.3	18691.2	14255.2	18653.6	7	11058.6	10794.3		7805.53				9886.13	3	1.88685	0.0312777	4		18030.4	17458.7	18757.7	15835.7	17618.3	16550.1	17375.1	6	20572.3	17037.6	16611.5		6889.24	15933.9		15408.9	5	1.1276	0.684852	1
P48361	ASK10	947	_NSEGS[Phospho (STY)]SPC[Carbamidomethyl (C)]YNDDQIR_.2		6829.03	10594.4		8404.59		7120.48	8237.14	4									0			4				8965.16				8965.16	1						9656.48		9656.48	1	0.928408		0
P48361	ASK10	947	_NSEGS[Phospho (STY)]S[Phospho (STY)]PC[Carbamidomethyl (C)]YNDDQIR_.2									0					4854.91			4854.91	1			-1									0	7553.42		10488.8	8583				8875.08	3			-3
P48361	ASK10	948	_NS[Phospho (STY)]EGS[Phospho (STY)]S[Phospho (STY)]PC[Carbamidomethyl (C)]YNDDQIR_.2	2539.26	38405.5					31766.9	24237.2	3		63422.8		29648.3			21975	38348.7	3	0.632023	0.766359	0		55207.5	50128.3		43009.9	52536.5	43631.4	48902.7	5		70206.5	95950.1	74978.7		56474.7		74402.5	4	0.657273	0.0901167	1
P48361	ASK10	948	_NS[Phospho (STY)]EGSS[Phospho (STY)]PC[Carbamidomethyl (C)]YNDDQIR_.2	12052.8	11814	16380			11377.2	10621.2	12449	5	14869					13528.3		14198.7	2	0.876775	0.70508	3		16914.1		13667.9	13448.5	13226.8	12916.1	14034.7	5	22403.6	16528.3		15583.4	6962	16947	16476.3	15816.8	6	0.887328	0.751194	-1
P48361	ASK10	948	_NSEGSS[Phospho (STY)]PC[Carbamidomethyl (C)]YNDDQIR_.2			11222	7357.49	9088.51	6341.15	7308.83	8263.6	5		18408.7	12922.1	14220.8	12529.8	12414.4	12637.7	13855.6	6	0.59641	0.028174	-1	10706.8	12513.6	11331.2	10944.1	10389.8	13362.2	13481.8	11818.5	7		19207.9	21055.3	23349.1	6339.63	14564.9	12011.8	16088.1	6	0.73461	0.360933	1
P48361	ASK10	948	_NSEGS[Phospho (STY)]S[Phospho (STY)]PC[Carbamidomethyl (C)]YNDDQIR_.2									0					4854.91			4854.91	1			-1									0	7553.42		10488.8	8583				8875.08	3			-3
P48361	ASK10	969	_QQQQPLQM[Oxidation (M)]QPLS[Phospho (STY)]R_.2	10990.5	5737.64	8726.22	5381.39	7199.13	4807.45	4634.42	6782.39	7	16711.3		5949.59	4351.14	6207.89		10484.3	8740.85	5	0.775942	0.722458	2	16830.7	5350.94	4690.15	4501.18	4600.67	3756.49	5063.21	6399.05	7	16299.5	6624.79	5000.49	5648.31	6313.94	7856.95	7442.73	7883.81	7	0.81167	0.786653	0
P48361	ASK10	969	_QQQQPLQMQPLS[Phospho (STY)]R_.3	13754.9					1306.16		7530.52	2	15693.8	3124.74		6564.32	1120.45			6625.83	4	1.13654	0.964825	-2	16332.9	5363.4	1688.34				3148.03	6633.17	4	16827.1							16827.1	1	0.394195	0.581154	3
P48361	ASK10	971	_T[Phospho (STY)]SS[Phospho (STY)]SS[Phospho (STY)]VNVTAMR_.2									0									0			0									0							254389	254389	1			-1
P48361	ASK10	971	_T[Phospho (STY)]SSSS[Phospho (STY)]VNVTAMR_.2		36916.7		39872.3		33460.7	34111.8	36090.4	4					38651.1			38651.1	1	0.933748	0.791306	3		48524.1	37710.7		39091.8		36361.7	40422.1	4			50027.6				56164	53095.8	2	0.761304	0.227166	2
P48361	ASK10	971	_T[Phospho (STY)]S[Phospho (STY)]SSSVNVTAMR_.2		13061.6	12151.2		9672.53			11628.4	3									0			3						9954.08		9954.08	1	5797.68							5797.68	1	1.71691		0
P48361	ASK10	971	_T[Phospho (STY)]SSSSVNVTAMR_.2	46153.4							46153.4	1									0			1							32218	32218	1						41824.8	42639.8	42232.3	2	0.762876	0.212614	-1
P48361	ASK10	972	_TS[Phospho (STY)]S[Phospho (STY)]SS[Phospho (STY)]VNVTAMR_.2	376000							376000	1									0			1									0									0			0
P48361	ASK10	972	_TS[Phospho (STY)]S[Phospho (STY)]SSVNVTAMR_.2	197859							197859	1									0			1			120159					120159	1	169245							169245	1	0.709972		0
P48361	ASK10	972	_TS[Phospho (STY)]S[Phospho (STY)]SS[Phospho (STY)]VNVTAM[Oxidation (M)]R_.2						62293.9		62293.9	1	35471.2				40416.5			37943.8	2	1.64174	0.410744	-1									0			82508.3					82508.3	1			-1
P48361	ASK10	972	_TS[Phospho (STY)]SS[Phospho (STY)]S[Phospho (STY)]VNVTAM[Oxidation (M)]R_.2									0									0			0							45358.6	45358.6	1									0			1
P48361	ASK10	972	_TS[Phospho (STY)]SSS[Phospho (STY)]VNVTAMR_.2									0						54462.1	64850.9	59656.5	2			-2									0		63870.6						63870.6	1			-1
P48361	ASK10	972	_TS[Phospho (STY)]SSSVNVTAMR_.2			32068.7	22940.3				27504.5	2	69960.8						45969.2	57965	2	0.474502	0.468029	0	64532.1							64532.1	1	65844.1	55089		58301.6				59744.9	3	1.08013	0.789577	-2
P48361	ASK10	972	_TS[Phospho (STY)]S[Phospho (STY)]SSVNVTAM[Oxidation (M)]R_.2									0									0			0									0						24376.5		24376.5	1			-1
P48361	ASK10	972	_T[Phospho (STY)]S[Phospho (STY)]SSSVNVTAMR_.2		13061.6	12151.2		9672.53			11628.4	3									0			3						9954.08		9954.08	1	5797.68							5797.68	1	1.71691		0
P48361	ASK10	973	_T[Phospho (STY)]SS[Phospho (STY)]SS[Phospho (STY)]VNVTAMR_.2									0									0			0									0							254389	254389	1			-1
P48361	ASK10	973	_TS[Phospho (STY)]S[Phospho (STY)]SS[Phospho (STY)]VNVTAMR_.2	376000							376000	1									0			1									0									0			0
P48361	ASK10	973	_TS[Phospho (STY)]S[Phospho (STY)]SSVNVTAMR_.2	197859							197859	1									0			1			120159					120159	1	169245							169245	1	0.709972		0
P48361	ASK10	973	_TS[Phospho (STY)]S[Phospho (STY)]SS[Phospho (STY)]VNVTAM[Oxidation (M)]R_.2						62293.9		62293.9	1	35471.2				40416.5			37943.8	2	1.64174	0.410744	-1									0			82508.3					82508.3	1			-1
P48361	ASK10	973	_TS[Phospho (STY)]S[Phospho (STY)]SSVNVTAM[Oxidation (M)]R_.2									0									0			0									0						24376.5		24376.5	1			-1
[truncated: 32,258 more rows]

## Sheet: metaphase
GeneName	Site	Peptide detected	CDC5_replicate_1	CDC5_replicate_2	CDC5_replicate_3	CDC5_replicate_4	CDC5_replicate_5	CDC5_replicate_6	CDC5_mean	CDC5_# of replicates detected	cdc5as1_replicate_1	cdc5as1_replicate_2	cdc5as1_replicate_3	cdc5as1_replicate_4	cdc5as1_replicate_5	cdc5as1_replicate_6	cdc5as1_mean	cdc5as1_# of replicates detected	Ratio_CDC5 to cdc5as1	adjusted p-value_CDC5 to cdc5as1	dN_CDC5 to cdc5as1
[truncated: 47,443 more rows]
